# Supplementary material for: Exploration of Alternative Approaches to Phenotyping of Late Leaf Spot and Groundnut Rosette Virus Disease for Groundnut Breeding
Source: Front Plant Sci. 2022 Jun 14;13:912332. doi: 10.3389/fpls.2022.912332 (PMC9238324; doi:10.3389/fpls.2022.912332)
Supplement: Supplementary file 1 [file Table_1.xlsx]

## Sheet: Sheet1
Traits	Phenological stage	MT	PearsonCorrelation
NDVI	R2	Spanish	-0.31
Intensity	R2	Spanish	-0.69
Hue	R2	Spanish	-0.44
Saturation	R2	Spanish	-0.7
Lightness	R2	Spanish	-0.74
a*	R2	Spanish	-0.23
b*	R2	Spanish	-0.71
ab	R2	Spanish	-0.56
NDLab	R2	Spanish	-0.2
u*	R2	Spanish	-0.57
v*	R2	Spanish	-0.69
uv	R2	Spanish	-0.7
NDLuv	R2	Spanish	0.2
GA	R2	Spanish	-0.48
GGA	R2	Spanish	-0.18
CSI	R2	Spanish	-0.7
Canopy Temp	R2	Spanish
NDVI	R2	Valencia	-0.46
Intensity	R2	Valencia	-0.77
Hue	R2	Valencia	-0.72
Saturation	R2	Valencia	-0.88
Lightness	R2	Valencia	-0.92
a*	R2	Valencia	-0.22
b*	R2	Valencia	-0.88
ab	R2	Valencia	-0.6
NDLab	R2	Valencia	-0.14
u*	R2	Valencia	-0.65
v*	R2	Valencia	-0.89
uv	R2	Valencia	-0.81
NDLuv	R2	Valencia	0.43
GA	R2	Valencia	-0.9
GGA	R2	Valencia	-0.65
CSI	R2	Valencia	-0.87
Canopy Temp	R2	Valencia
NDVI	R2	Virginia	-0.07
Intensity	R2	Virginia	-0.67
Hue	R2	Virginia	-0.36
Saturation	R2	Virginia	-0.69
Lightness	R2	Virginia	-0.65
a*	R2	Virginia	-0.44
b*	R2	Virginia	-0.69
ab	R2	Virginia	-0.66
NDLab	R2	Virginia	-0.01
u*	R2	Virginia	-0.67
v*	R2	Virginia	-0.68
uv	R2	Virginia	-0.72
NDLuv	R2	Virginia	0.11
GA	R2	Virginia	-0.41
GGA	R2	Virginia	-0.01
CSI	R2	Virginia	-0.72
Canopy Temp	R2	Virginia
NDVI	R2	All	-0.21
Intensity	R2	All	-0.67
Hue	R2	All	-0.38
Saturation	R2	All	-0.67
Lightness	R2	All	-0.72
a*	R2	All	-0.31
b*	R2	All	-0.68
ab	R2	All	-0.59
NDLab	R2	All	-0.11
u*	R2	All	-0.6
v*	R2	All	-0.67
uv	R2	All	-0.7
NDLuv	R2	All	0.18
GA	R2	All	-0.47
GGA	R2	All	-0.14
CSI	R2	All	-0.7
Canopy Temp	R2	All
NDVI	R4	Spanish	-0.28
Intensity	R4	Spanish	-0.44
Hue	R4	Spanish	-0.33
Saturation	R4	Spanish	0.44
Lightness	R4	Spanish	-0.41
a*	R4	Spanish	0.35
b*	R4	Spanish	0.29
ab	R4	Spanish	0.36
NDLab	R4	Spanish	-0.32
u*	R4	Spanish	0.37
v*	R4	Spanish	-0.14
uv	R4	Spanish	0.39
NDLuv	R4	Spanish	-0.19
GA	R4	Spanish	-0.32
GGA	R4	Spanish	-0.29
CSI	R4	Spanish	-0.25
Canopy Temp	R4	Spanish	-0.27
NDVI	R4	Valencia	0.04
Intensity	R4	Valencia	-0.45
Hue	R4	Valencia	-0.33
Saturation	R4	Valencia	0.46
Lightness	R4	Valencia	-0.42
a*	R4	Valencia	0.33
b*	R4	Valencia	0.61
ab	R4	Valencia	0.34
NDLab	R4	Valencia	-0.31
u*	R4	Valencia	0.35
v*	R4	Valencia	-0.15
uv	R4	Valencia	0.37
NDLuv	R4	Valencia	-0.37
GA	R4	Valencia	-0.31
GGA	R4	Valencia	-0.29
CSI	R4	Valencia	-0.23
Canopy Temp	R4	Valencia	-0.3
NDVI	R4	Virginia	-0.39
Intensity	R4	Virginia	-0.4
Hue	R4	Virginia	-0.23
Saturation	R4	Virginia	0.41
Lightness	R4	Virginia	-0.34
a*	R4	Virginia	0.21
b*	R4	Virginia	0.38
ab	R4	Virginia	0.23
NDLab	R4	Virginia	-0.14
u*	R4	Virginia	0.26
v*	R4	Virginia	0.01
uv	R4	Virginia	0.33
NDLuv	R4	Virginia	-0.39
GA	R4	Virginia	-0.16
GGA	R4	Virginia	-0.15
CSI	R4	Virginia	-0.21
Canopy Temp	R4	Virginia	0.55
NDVI	R4	All	-0.3
Intensity	R4	All	-0.41
Hue	R4	All	-0.29
Saturation	R4	All	0.41
Lightness	R4	All	-0.37
a*	R4	All	0.3
b*	R4	All	0.31
ab	R4	All	0.32
NDLab	R4	All	-0.29
u*	R4	All	0.33
v*	R4	All	-0.11
uv	R4	All	0.36
NDLuv	R4	All	-0.22
GA	R4	All	-0.28
GGA	R4	All	-0.26
CSI	R4	All	-0.15
Canopy Temp	R4	All	0.06
NDVI	R7	Spanish	-0.67
Intensity	R7	Spanish	0.04
Hue	R7	Spanish	-0.04
Saturation	R7	Spanish	0.09
Lightness	R7	Spanish	0.02
a*	R7	Spanish	0
b*	R7	Spanish	0.24
ab	R7	Spanish	0.02
NDLab	R7	Spanish	0.16
u*	R7	Spanish	0.01
v*	R7	Spanish	0.12
uv	R7	Spanish	0.07
NDLuv	R7	Spanish	-0.25
GA	R7	Spanish	-0.09
GGA	R7	Spanish	-0.28
CSI	R7	Spanish	0.61
Canopy Temp	R7	Spanish	0.35
NDVI	R7	Valencia	-0.76
Intensity	R7	Valencia	0.29
Hue	R7	Valencia	0.16
Saturation	R7	Valencia	-0.39
Lightness	R7	Valencia	0.2
a*	R7	Valencia	-0.2
b*	R7	Valencia	0.16
ab	R7	Valencia	-0.23
NDLab	R7	Valencia	0.19
u*	R7	Valencia	-0.22
v*	R7	Valencia	0.18
uv	R7	Valencia	-0.23
NDLuv	R7	Valencia	-0.38
GA	R7	Valencia	0.04
GGA	R7	Valencia	-0.26
CSI	R7	Valencia	0.66
Canopy Temp	R7	Valencia	-0.69
NDVI	R7	Virginia	-0.43
Intensity	R7	Virginia	0.17
Hue	R7	Virginia	0.32
Saturation	R7	Virginia	-0.23
Lightness	R7	Virginia	0.3
a*	R7	Virginia	-0.37
b*	R7	Virginia	0.3
ab	R7	Virginia	-0.35
NDLab	R7	Virginia	0.44
u*	R7	Virginia	-0.38
v*	R7	Virginia	0.34
uv	R7	Virginia	-0.35
NDLuv	R7	Virginia	-0.42
GA	R7	Virginia	0.32
GGA	R7	Virginia	0.23
CSI	R7	Virginia	0.21
Canopy Temp	R7	Virginia	0.47
NDVI	R7	All	-0.73
Intensity	R7	All	0.02
Hue	R7	All	-0.02
Saturation	R7	All	-0.04
Lightness	R7	All	-0.02
a*	R7	All	-0.03
b*	R7	All	0.13
ab	R7	All	-0.01
NDLab	R7	All	0.18
u*	R7	All	-0.03
v*	R7	All	0.05
uv	R7	All	0.01
NDLuv	R7	All	-0.19
GA	R7	All	-0.07
GGA	R7	All	-0.21
CSI	R7	All	0.61
Canopy Temp	R7	All	0.42
NDVI	R8	Spanish	-0.66
Intensity	R8	Spanish	-0.37
Hue	R8	Spanish	-0.58
Saturation	R8	Spanish	-0.51
Lightness	R8	Spanish	-0.58
a*	R8	Spanish	0.34
b*	R8	Spanish	-0.56
ab	R8	Spanish	0.19
NDLab	R8	Spanish	-0.65
u*	R8	Spanish	0.06
v*	R8	Spanish	-0.62
uv	R8	Spanish	-0.17
NDLuv	R8	Spanish	0.04
GA	R8	Spanish	-0.62
GGA	R8	Spanish	-0.52
CSI	R8	Spanish	0.01
Canopy Temp	R8	Spanish	0.11
NDVI	R8	Valencia	-0.67
Intensity	R8	Valencia	-0.48
Hue	R8	Valencia	-0.78
Saturation	R8	Valencia	-0.66
Lightness	R8	Valencia	-0.56
a*	R8	Valencia	0.07
b*	R8	Valencia	-0.67
ab	R8	Valencia	-0.19
NDLab	R8	Valencia	-0.52
u*	R8	Valencia	-0.38
v*	R8	Valencia	-0.7
uv	R8	Valencia	-0.53
NDLuv	R8	Valencia	-0.28
GA	R8	Valencia	-0.78
GGA	R8	Valencia	-0.6
CSI	R8	Valencia	-0.52
Canopy Temp	R8	Valencia	0.08
NDVI	R8	Virginia	-0.47
Intensity	R8	Virginia	-0.36
Hue	R8	Virginia	-0.28
Saturation	R8	Virginia	-0.55
Lightness	R8	Virginia	-0.57
a*	R8	Virginia	0.19
b*	R8	Virginia	-0.64
ab	R8	Virginia	0.2
NDLab	R8	Virginia	-0.23
u*	R8	Virginia	0.02
v*	R8	Virginia	-0.68
uv	R8	Virginia	-0.09
NDLuv	R8	Virginia	-0.39
GA	R8	Virginia	-0.45
GGA	R8	Virginia	-0.36
CSI	R8	Virginia	-0.07
Canopy Temp	R8	Virginia	0.21
NDVI	R8	All	-0.72
Intensity	R8	All	-0.3
Hue	R8	All	-0.6
Saturation	R8	All	-0.55
Lightness	R8	All	-0.62
a*	R8	All	0.46
b*	R8	All	-0.64
ab	R8	All	0.39
NDLab	R8	All	-0.64
u*	R8	All	0.24
v*	R8	All	-0.71
uv	R8	All	0.02
NDLuv	R8	All	-0.08
GA	R8	All	-0.67
GGA	R8	All	-0.6
CSI	R8	All	0.13
Canopy Temp	R8	All	0.29
