# Supplementary material for: Exploration of Alternative Approaches to Phenotyping of Late Leaf Spot and Groundnut Rosette Virus Disease for Groundnut Breeding
Source: Front Plant Sci. 2022 Jun 14;13:912332. doi: 10.3389/fpls.2022.912332 (PMC9238324; doi:10.3389/fpls.2022.912332)
Supplement: Supplementary file 2 [file Table_2.xlsx]

## Sheet: Fig4_Late leaf spot
	R2				R4				R7				R8
Traits	Spanish	Valencia	Virginia	All	Spanish	Valencia	Virginia	All	Spanish	Valencia	Virginia	All	Spanish	Valencia	Virginia	All
NDVI	-0.07	-0.23	0.08	-0.02	-0.44	0.41	-0.01	-0.42	-0.54	-0.22	-0.59	-0.59	-0.89	-0.83	-0.64	-0.85
Intensity	-0.86	-0.73	-0.6	-0.69	-0.4	-0.05	0.17	-0.22	-0.12	-0.26	-0.53	-0.27	-0.52	-0.65	-0.6	-0.47
Hue	-0.19	-0.36	-0.06	-0.14	0.3	0.02	0.45	0.16	-0.67	-0.87	-0.62	-0.66	-0.62	-0.9	-0.04	-0.55
Saturation	-0.7	-0.8	-0.64	-0.66	0.59	-0.08	0.43	0.54	0.06	0.06	0.42	0.16	-0.66	-0.81	-0.74	-0.68
Lightness	-0.76	-0.81	-0.55	-0.69	0.04	-0.05	0.51	0.07	-0.53	-0.57	-0.66	-0.6	-0.74	-0.74	-0.67	-0.74
a	-0.58	-0.55	-0.71	-0.6	-0.24	-0.04	-0.46	-0.12	0.68	0.84	0.61	0.65	0.29	-0.09	-0.04	0.37
b	-0.7	-0.78	-0.61	-0.65	0.55	-0.08	0.53	0.46	-0.56	-0.82	-0.42	-0.54	-0.72	-0.82	-0.75	-0.75
ab	-0.8	-0.77	-0.78	-0.76	-0.23	-0.04	-0.5	-0.13	0.67	0.82	0.63	0.65	0.12	-0.36	-0.03	0.29
NDLab	0.12	0.22	0.29	0.15	0.14	0.06	0.35	0.04	-0.71	-0.88	-0.44	-0.58	-0.57	-0.5	-0.02	-0.55
u	-0.82	-0.79	-0.8	-0.78	-0.17	-0.04	-0.44	-0.06	0.68	0.84	0.61	0.65	-0.05	-0.56	-0.23	0.11
v	-0.66	-0.75	-0.57	-0.61	0.48	0	0.53	0.35	-0.66	-0.82	-0.58	-0.63	-0.77	-0.84	-0.74	-0.8
uv	-0.82	-0.82	-0.73	-0.76	-0.1	-0.04	-0.43	-0.01	0.65	0.82	0.64	0.64	-0.3	-0.7	-0.35	-0.12
NDLuv	-0.1	0.69	0	0.04	0	0	0	0	0.71	0.78	-0.22	0.2	-0.07	-0.08	-0.68	-0.15
GA	-0.3	-0.57	-0.23	-0.27	0.26	0.05	0.48	0.13	-0.64	-0.83	-0.61	-0.64	-0.69	-0.79	-0.31	-0.66
GGA	0.1	-0.18	0.26	0.14	0.19	-0.02	0.44	0.05	-0.52	-0.65	-0.62	-0.59	-0.59	-0.53	-0.23	-0.59
CSI	-0.8	-0.79	-0.73	-0.74	0.72	0.8	0.78	0.76	-0.24	-0.48	0.39	0.02	0.02	-0.71	-0.03	0.14
CT									0.01	0.28	0.25	0.26	0.4	0.64	0.16	0.42

## Sheet: Fig5_Groundnut rosette disease
	R2				R4				R7				R8
Traits	Spanish	Valencia	Virginia	All	Spanish	Valencia	Virginia	All	Spanish	Valencia	Virginia	All	Spanish	Valencia	Virginia	All
NDVI	-0.31	-0.46	-0.07	-0.21	-0.28	0.04	-0.39	-0.3	-0.67	-0.76	-0.43	-0.73	-0.66	-0.67	-0.47	-0.72
Intensity	-0.69	-0.77	-0.67	-0.67	-0.44	-0.45	-0.4	-0.41	0.04	0.29	0.17	0.02	-0.37	-0.48	-0.36	-0.3
Hue	-0.44	-0.72	-0.36	-0.38	-0.33	-0.33	-0.23	-0.29	-0.04	0.16	0.32	-0.02	-0.58	-0.78	-0.28	-0.6
Saturation	-0.7	-0.88	-0.69	-0.67	0.44	0.46	0.41	0.41	0.09	-0.39	-0.23	-0.04	-0.51	-0.66	-0.55	-0.55
Lightness	-0.74	-0.92	-0.65	-0.72	-0.41	-0.42	-0.34	-0.37	0.02	0.2	0.3	-0.02	-0.58	-0.56	-0.57	-0.62
a	-0.23	-0.22	-0.44	-0.31	0.35	0.33	0.21	0.3	0	-0.2	-0.37	-0.03	0.34	0.07	0.19	0.46
b	-0.71	-0.88	-0.69	-0.68	0.29	0.61	0.38	0.31	0.24	0.16	0.3	0.13	-0.56	-0.67	-0.64	-0.64
ab	-0.56	-0.6	-0.66	-0.59	0.36	0.34	0.23	0.32	0.02	-0.23	-0.35	-0.01	0.19	-0.19	0.2	0.39
NDLab	-0.2	-0.14	-0.01	-0.11	-0.32	-0.31	-0.14	-0.29	0.16	0.19	0.44	0.18	-0.65	-0.52	-0.23	-0.64
u	-0.57	-0.65	-0.67	-0.6	0.37	0.35	0.26	0.33	0.01	-0.22	-0.38	-0.03	0.06	-0.38	0.02	0.24
v	-0.69	-0.89	-0.68	-0.67	-0.14	-0.15	0.01	-0.11	0.12	0.18	0.34	0.05	-0.62	-0.7	-0.68	-0.71
uv	-0.7	-0.81	-0.72	-0.7	0.39	0.37	0.33	0.36	0.07	-0.23	-0.35	0.01	-0.17	-0.53	-0.09	0.02
NDLuv	0.2	0.43	0.11	0.18	-0.19	-0.37	-0.39	-0.22	-0.25	-0.38	-0.42	-0.19	0.04	-0.28	-0.39	-0.08
GA	-0.48	-0.9	-0.41	-0.47	-0.32	-0.31	-0.16	-0.28	-0.09	0.04	0.32	-0.07	-0.62	-0.78	-0.45	-0.67
GGA	-0.18	-0.65	-0.01	-0.14	-0.29	-0.29	-0.15	-0.26	-0.28	-0.26	0.23	-0.21	-0.52	-0.6	-0.36	-0.6
CSI	-0.7	-0.87	-0.72	-0.7	-0.25	-0.23	-0.21	-0.15	0.61	0.66	0.21	0.61	0.01	-0.52	-0.07	0.13
CT					-0.27	-0.3	0.55	0.06	0.35	-0.69	0.47	0.42	0.11	0.08	0.21	0.29
