# Supplementary material for: Exploration of Alternative Approaches to Phenotyping of Late Leaf Spot and Groundnut Rosette Virus Disease for Groundnut Breeding
Source: Front Plant Sci. 2022 Jun 14;13:912332. doi: 10.3389/fpls.2022.912332 (PMC9238324; doi:10.3389/fpls.2022.912332)
Supplement: Supplementary file 3 [file Table_3.xlsx]

## Sheet: Dataset
Genotype	MarketType	REP	BLK	Location	Season	Phenological stage	Plantstand	Height	NDVI	Intensity	Hue	Saturation	Lightness	a	b	ab	NDLab	u	v	uv	NDLuv	GA	GGA	CSI	CT	LLS	GRD count	GRDPDI	GRDSEV
SGV 10010 ER	Spanish	1	1	NaSARRI	2020A	R2	8	7	0.28	0.494241	30.9074	0.176648	54.4552	2.10862	22.1545	46.7153	-0.105353	14.665	25.4293	372.921	-3.32314	0.0643372	0.0431903	32.8688
Serenut 14R	Virginia	1	1	NaSARRI	2020A	R2	3	5	0.23	0.480019	28.2236	0.173427	52.7375	3.15309	21.1107	66.5641	-0.227147	15.6209	23.8969	373.29	-4.15239	0.0279028	0.0151908	45.5581
DOK 1T	Spanish	1	1	NaSARRI	2020A	R2	4	3	0.22	0.510597	29.4471	0.168826	55.9276	2.55847	21.8936	56.014	-0.153278	15.3427	25.293	388.063	-3.61959	0.0395796	0.0240059	39.3477
ICGV SM 03590	Spanish	1	1	NaSARRI	2020A	R2	6	6.5	0.32	0.511158	30.5077	0.162435	56.0012	1.82432	21.4694	39.1669	-0.0798561	14.0344	25.0164	351.09	-3.17565	0.0636822	0.0392934	38.2976
ICGV 02501	Spanish	1	1	NaSARRI	2020A	R2	15	10	0.49	0.464097	40.7126	0.252471	53.1185	-0.890876	28.3335	-25.2416	0.125123	12.6778	31.7345	402.323	-2.16448	0.151798	0.102679	32.3578
SGV 0080	Virginia	1	1	NaSARRI	2020A	R2	12	8.5	0.6	0.455662	44.081	0.241367	52.3386	-2.60218	27.3553	-71.1834	0.232718	9.66233	31.0214	299.739	-1.77484	0.196148	0.149663	23.6986
JL 24	Spanish	1	1	NaSARRI	2020A	R2	6	10	0.37	0.480143	36.9224	0.215659	53.9688	0.335146	25.5531	8.56402	0.0507175	13.4511	29.0587	390.87	-2.49943	0.0946311	0.0677928	28.361
Acholi White	Valencia	1	1	NaSARRI	2020A	R2	8	11	0.4	0.447673	40.0283	0.225126	50.9117	-0.96629	25.2544	-24.4031	0.14447	11.1188	28.4428	316.25	-2.10443	0.127444	0.094219	26.0706
ICGV-SM 16502	Spanish	1	1	NaSARRI	2020A	R2	16	13	0.45	0.449804	44.0115	0.251307	51.8524	-2.4737	27.9002	-69.0167	0.221439	10.0269	31.3839	314.684	-1.80753	0.185604	0.136936	26.2214
SGV 0060	Virginia	1	1	NaSARRI	2020A	R2	13	9.5	0.48	0.456297	41.3355	0.235182	52.0861	-1.42422	26.593	-37.8744	0.167089	11.0853	30.024	332.826	-2.01163	0.156525	0.124752	20.299
SGV 0075	Virginia	1	2	NaSARRI	2020A	R2	14	11	0.45	0.437766	37.5064	0.26794	50.1875	1.04292	27.9218	29.1203	-0.0030791	15.1246	30.2952	458.203	-2.74695	0.108083	0.0764349	29.2815
ICGV 01502	Spanish	1	2	NaSARRI	2020A	R2	14	12	0.44	0.459848	34.7431	0.210143	51.5719	1.20911	24.0108	29.0317	-0.0175711	13.8934	26.9516	374.451	-2.83429	0.127138	0.089077	29.9368
SGV 07010	Virginia	1	2	NaSARRI	2020A	R2	9	9	0.4	0.452056	36.5271	0.256922	51.4883	1.42057	27.6328	39.2543	-0.0309102	15.7199	30.2567	475.633	-2.89485	0.0974151	0.067429	30.7818
Serenut 5R	Virginia	1	2	NaSARRI	2020A	R2	4	5	0.23	0.493212	28.233	0.175876	54.1209	3.34525	21.7766	72.848	-0.241388	16.3384	24.7419	404.243	-4.26227	0.027361	0.0174293	36.299
12CS-015	Spanish	1	2	NaSARRI	2020A	R2	9	8	0.33	0.452263	35.5478	0.242311	51.2364	1.58099	26.379	41.7049	-0.0450413	15.4215	29.029	447.671	-2.97454	0.0747357	0.043025	42.4305
DOK 1R	Spanish	1	2	NaSARRI	2020A	R2	12	10.5	0.29	0.438623	32.4815	0.191455	48.9352	1.62986	21.4575	34.9727	-0.0604826	13.1761	23.9308	315.315	-3.07169	0.0964129	0.0582591	39.5734
B7-30-9-3	Spanish	1	2	NaSARRI	2020A	R2	13	12	0.51	0.439224	43.4566	0.268764	50.9117	-2.04762	28.7237	-58.8152	0.191847	10.8931	31.8124	346.536	-1.90269	0.181472	0.134171	26.0651
ICGV-SM 08556	Spanish	1	2	NaSARRI	2020A	R2	13	12	0.4	0.443646	41.4928	0.253341	50.9931	-1.25591	27.4877	-34.522	0.151691	11.5963	30.5681	354.476	-2.06112	0.158294	0.123902	21.7265
Serenut 7T	Virginia	1	2	NaSARRI	2020A	R2	4	9.5	0.29	0.49673	29.2493	0.1668	54.4712	2.48778	21.2341	52.8258	-0.150689	14.8138	24.417	361.71	-3.6056	0.0435515	0.0309616	28.9081
ICGV-SM 01709	Virginia	1	2	NaSARRI	2020A	R2	17	11	0.58	0.434213	42.7941	0.248718	50.0167	-1.913	26.7921	-51.2533	0.196128	10.2608	29.855	306.336	-1.89936	0.182861	0.140434	23.2019
ICGV-SM 95526	Valencia	1	3	NaSARRI	2020A	R2	18	18	0.52	0.459359	42.0139	0.287207	53.2379	-1.07461	31.1066	-33.4276	0.125048	13.4965	34.2646	462.454	-2.14815	0.178293	0.124939	29.9247
ICGV-SM 95355	Virginia	1	3	NaSARRI	2020A	R2	13	12	0.52	0.429238	43.8571	0.293137	50.2128	-1.99653	30.1568	-60.2089	0.180768	11.4392	32.8672	375.975	-1.93092	0.215316	0.168919	21.5482
Serenut 6T	Spanish	1	3	NaSARRI	2020A	R2	14	10	0.45	0.440404	39.3783	0.285053	50.8833	0.351462	29.6062	10.4055	0.0428718	14.8192	32.0784	475.377	-2.51367	0.146372	0.104835	28.3777
ICGV-SM 16520	Spanish	1	3	NaSARRI	2020A	R2	13	9	0.4	0.444938	36.7057	0.277665	51.0108	1.75729	28.9597	50.8906	-0.0537038	16.709	31.2531	522.207	-3.02121	0.103501	0.0674583	34.8235
ICGV 01504	Spanish	1	3	NaSARRI	2020A	R2	12	11.5	0.38	0.437309	39.5464	0.27859	50.4726	0.139335	28.9535	4.03425	0.0577353	14.2022	31.4553	446.734	-2.44656	0.137054	0.0962794	29.751
SGV 0805	Valencia	1	3	NaSARRI	2020A	R2	8	6	0.33	0.444612	35.305	0.259487	50.6017	2.14404	27.3411	58.6205	-0.087341	16.5992	29.6452	492.086	-3.22117	0.0821213	0.0526146	35.9306
ICGV-SM 01731	Virginia	1	3	NaSARRI	2020A	R2	13	9	0.49	0.468723	40.5033	0.253597	53.6069	-0.764735	28.6266	-21.8918	0.116134	13.0315	32.0833	418.093	-2.20004	0.152516	0.112779	26.0545
ICGV-SM 95714	Valencia	1	3	NaSARRI	2020A	R2	10	11.5	0.33	0.445421	38.513	0.264036	51.0603	0.455848	28.1106	12.8142	0.0379799	14.4105	30.7878	443.667	-2.54345	0.113724	0.0760292	33.1458
Serenut 11T	Virginia	1	3	NaSARRI	2020A	R2	11	8.5	0.46	0.441952	40.562	0.244767	50.6053	-0.913128	26.6198	-24.3073	0.1341	11.7246	29.6262	347.355	-2.13479	0.159034	0.121113	23.8446
Serenut 8R	Virginia	1	3	NaSARRI	2020A	R2	5	7.5	0.39	0.466	29.8484	0.173497	51.415	2.34531	20.7913	48.762	-0.138364	14.1504	23.5357	333.04	-3.53249	0.05278	0.0340089	35.5647
ICGV-SM 99568	Spanish	1	4	NaSARRI	2020A	R2	14	12.5	0.43	0.428433	40.7971	0.298959	49.9035	-0.236565	30.2158	-7.14801	0.0786309	14.0546	32.471	456.367	-2.3447	0.161221	0.126268	21.68
ICGV-SM 88710	Virginia	1	4	NaSARRI	2020A	R2	18	11.5	0.43	0.447586	40.4591	0.292319	51.8765	-0.133757	30.7137	-4.10817	0.0711993	14.6223	33.384	488.151	-2.37867	0.171213	0.127801	25.356
SGV 0071	Virginia	1	4	NaSARRI	2020A	R2	12	5.5	0.32	0.467814	32.6508	0.224207	52.3964	2.7252	25.2709	68.8682	-0.14654	16.8038	27.9944	470.412	-3.59278	0.112915	0.0791528	29.9005
SGV 0084	Virginia	1	4	NaSARRI	2020A	R2	16	6.5	0.38	0.4628	39.0664	0.290617	53.357	0.695538	31.2179	21.7132	0.0193172	16.2461	34.0171	552.645	-2.62443	0.149284	0.105973	29.0125
ICGV 01514	Spanish	1	4	NaSARRI	2020A	R2	10	8	0.31	0.459398	34.6364	0.280805	52.3896	3.21338	29.7066	95.4588	-0.161013	19.4	31.9289	619.421	-3.72012	0.0821098	0.0547653	33.3024
RedBeauty	Valencia	1	4	NaSARRI	2020A	R2	14	11.5	0.48	0.465719	37.4667	0.221936	52.5758	0.189077	25.5139	4.8241	0.0616089	13.0934	28.7831	376.867	-2.4492	0.172442	0.128068	25.7329
ICGV-SM 03702	Virginia	1	4	NaSARRI	2020A	R2	11	9	0.45	0.444246	40.5123	0.2716	51.2258	-0.485423	28.8768	-14.0175	0.0978467	13.3149	31.7002	422.084	-2.27054	0.167825	0.128063	23.6929
SGV 0023	Virginia	1	4	NaSARRI	2020A	R2	12	11	0.48	0.44387	42.7596	0.258891	51.2118	-1.81424	28.0858	-50.9542	0.182151	11.0213	31.2692	344.626	-1.94327	0.192652	0.155668	19.1972
SGV 990400	Virginia	1	4	NaSARRI	2020A	R2	7	13	0.43	0.499064	30.4001	0.169269	54.8306	2.07309	21.6439	44.8698	-0.104332	14.405	24.9743	359.754	-3.31735	0.0709418	0.0562127	20.7623
ICGV-SM 16501	Spanish	1	4	NaSARRI	2020A	R2	14	11	0.51	0.445373	44.0106	0.259442	51.4918	-2.39358	28.3369	-67.8267	0.2139	10.2842	31.6774	325.777	-1.8292	0.194098	0.14655	24.4968
ICGVS-SM 0205	Spanish	1	5	NaSARRI	2020A	R2	8	9	0.3	0.44373	34.789	0.25922	50.4546	2.42798	27.2153	66.0783	-0.110751	16.9613	29.4402	499.345	-3.36835	0.0724439	0.0468291	35.3581
ICGV 9555	Spanish	1	5	NaSARRI	2020A	R2	15	9.5	0.34	0.461357	38.5964	0.284017	53.0619	0.829956	30.5532	25.3578	0.0110694	16.1592	33.3379	538.715	-2.6678	0.131457	0.0903183	31.2945
SGV 10005	Spanish	1	5	NaSARRI	2020A	R2	11	10.5	0.35	0.46131	30.8823	0.211811	51.4115	3.20263	23.8009	76.2256	-0.203963	16.7891	26.3118	441.753	-4.00097	0.0765494	0.0537313	29.8083
ICGV 01515	Spanish	1	5	NaSARRI	2020A	R2	9	9.5	0.3	0.48457	30.3876	0.207668	53.7508	3.47651	24.3385	84.6131	-0.226559	17.6735	27.1957	480.643	-4.16922	0.0602584	0.0411974	31.6322
Serenut 4T	Spanish	1	5	NaSARRI	2020A	R2	7	8	0.34	0.475082	30.5151	0.197528	52.6635	2.96069	23.1407	68.5126	-0.185145	16.2493	25.9444	421.579	-3.85163	0.0680637	0.047437	30.305
ICGV 01510	Spanish	1	5	NaSARRI	2020A	R2	16	10.5	0.41	0.467697	39.3047	0.26582	53.5577	0.0848501	29.4572	2.49945	0.060262	14.6453	32.6441	478.083	-2.43644	0.140078	0.0985076	29.6764
Serenut 9T	Virginia	1	5	NaSARRI	2020A	R2	7	9.5	0.3	0.445766	35.6409	0.266114	50.8442	2.09849	27.9618	58.6775	-0.0817838	16.809	30.2631	508.692	-3.18748	0.0883228	0.0569745	35.4928
ICGV-SM 96714	Valencia	1	5	NaSARRI	2020A	R2	10	12.5	0.45	0.460206	40.6932	0.259411	52.7946	-0.768437	28.7118	-22.0632	0.116038	12.982	31.9783	415.141	-2.19841	0.152254	0.112126	26.3558
SGV 0065	Virginia	1	5	NaSARRI	2020A	R2	14	9.5	0.52	0.46048	39.3318	0.184896	51.6726	-1.27588	22.4112	-28.5939	0.184378	9.52044	25.9168	246.739	-1.97957	0.196479	0.150009	23.651
SGV 0047	Virginia	1	5	NaSARRI	2020A	R2	12	8	0.42	0.478203	43.1162	0.234239	54.5669	-2.29883	27.7139	-63.7095	0.212741	10.4399	31.7658	331.631	-1.84565	0.174945	0.133234	23.8424
ICGV-SM 03702	Virginia	2	1	NaSARRI	2020A	R2	16	11	0.58	0.426535	48.4328	0.256328	49.7496	-4.27541	27.5631	-117.844	0.321294	7.07714	30.9605	219.112	-1.48845	0.241115	0.19462	19.2832
Serenut 4T	Spanish	2	1	NaSARRI	2020A	R2	13	10.5	0.42	0.441132	42.0938	0.251127	50.741	-1.5603	27.253	-42.5228	0.171756	11.0285	30.362	334.846	-1.9864	0.166871	0.126002	24.4914
ICGV-SM 99568	Spanish	2	1	NaSARRI	2020A	R2	10	12.5	0.44	0.448798	41.256	0.255063	51.5545	-1.12915	27.8504	-31.4474	0.14204	11.9812	30.9957	371.365	-2.09732	0.154757	0.110603	28.5314
ICGV SM 03590	Spanish	2	1	NaSARRI	2020A	R2	6	10.5	0.43	0.517167	31.3218	0.17668	56.8428	1.99942	23.0054	45.9974	-0.0908317	15.0785	26.6838	402.35	-3.23373	0.0836666	0.0611767	26.8804
12CS-015	Spanish	2	1	NaSARRI	2020A	R2	9	7	0.42	0.447432	38.2285	0.259274	51.1872	0.499468	27.8012	13.8858	0.0353712	14.366	30.5316	438.619	-2.5573	0.128258	0.0832736	35.0736
ICGV-SM 16502	Spanish	2	1	NaSARRI	2020A	R2	13	11	0.42	0.454468	41.1146	0.262935	52.2672	-0.942895	28.7797	-27.1362	0.12648	12.695	31.9542	405.659	-2.15455	0.164665	0.117034	28.9256
SGV 0805	Valencia	2	1	NaSARRI	2020A	R2	4	15.5	0.26	0.468458	34.5398	0.234787	52.7677	1.99819	26.3876	52.7273	-0.0786302	16.213	29.2675	474.514	-3.16486	0.0596695	0.0393761	34.0097
Serenut 9T	Virginia	2	1	NaSARRI	2020A	R2	9	9	0.41	0.452854	39.8545	0.242074	51.683	-0.613838	26.8456	-16.4788	0.113413	12.3606	30.005	370.879	-2.21866	0.146868	0.105666	28.0541
ICGV-SM 08556	Spanish	2	1	NaSARRI	2020A	R2	14	19	0.59	0.464874	45.5069	0.243732	53.4887	-3.26713	28.1508	-91.9725	0.263257	9.08321	32.1388	291.923	-1.67204	0.209778	0.160923	23.2889
Serenut 11T	Virginia	2	1	NaSARRI	2020A	R2	8	13	0.55	0.465911	42.3811	0.225889	53.0653	-2.02245	26.3673	-53.3265	0.20568	10.1836	30.138	306.914	-1.87653	0.168679	0.12477	26.0311
ICGV 01502	Spanish	2	2	NaSARRI	2020A	R2	17	15	0.64	0.426819	50.8423	0.255876	49.9656	-5.25539	27.781	-146	0.36757	5.75339	31.4018	180.667	-1.35675	0.272014	0.209263	23.0691
SGV 990400	Virginia	2	2	NaSARRI	2020A	R2	5	10	0.34	0.488826	35.8291	0.198809	54.5637	0.480324	24.3539	11.6978	0.0417854	13.2003	27.9736	369.261	-2.54696	0.0877771	0.0592511	32.4983
SGV 0071	Virginia	2	2	NaSARRI	2020A	R2	9	11.5	0.45	0.462153	40.0149	0.224021	52.4405	-0.967515	25.7946	-24.9567	0.141741	11.4685	29.258	335.546	-2.1143	0.141025	0.106416	24.5412
ICGV 01510	Spanish	2	2	NaSARRI	2020A	R2	18	11	0.48	0.459293	45.6306	0.245996	52.9352	-3.27652	28.0767	-91.9939	0.264365	8.99574	31.9507	287.42	-1.66756	0.221407	0.165714	25.1539
ICGV-SM 95355	Virginia	2	2	NaSARRI	2020A	R2	12	11.5	0.58	0.47736	47.3848	0.23873	54.9096	-4.18121	28.4987	-119.159	0.307673	7.97058	32.9556	262.675	-1.53651	0.235393	0.185841	21.0508
DOK 1R	Spanish	2	2	NaSARRI	2020A	R2	8	12.5	0.28	0.444014	38.638	0.251015	50.7446	0.138203	27.0171	3.73384	0.0618244	13.4644	29.8015	401.26	-2.4379	0.136698	0.0937204	31.44
ICGVS-SM 0205	Spanish	2	2	NaSARRI	2020A	R2	4	8.5	0.46	0.495434	30.0078	0.174064	54.4775	2.41954	21.8888	52.9607	-0.1387	15.0151	25.0998	376.876	-3.52874	0.0531285	0.0349348	34.2446
Serenut 8R	Virginia	2	2	NaSARRI	2020A	R2	3	8	0.45	0.499389	29.3677	0.159995	54.6847	2.17613	20.7595	45.1755	-0.120115	14.137	24.0227	339.609	-3.41364	0.0492379	0.027211	44.7358
SGV 10010 ER	Spanish	2	2	NaSARRI	2020A	R2	10	9	0.55	0.4599	41.0631	0.221705	52.2569	-1.47639	25.622	-37.8281	0.176266	10.6246	29.1623	309.838	-1.98523	0.161123	0.119609	25.7655
SGV 0060	Virginia	2	2	NaSARRI	2020A	R2	7	9.5	0.55	0.453858	39.7015	0.229371	51.6032	-0.750706	25.8394	-19.3978	0.126908	11.7387	29.0859	341.431	-2.17061	0.134356	0.0970666	27.754
DOK 1T	Spanish	2	3	NaSARRI	2020A	R2	3	7.5	0.21	0.510218	28.1106	0.138671	55.4829	1.85063	19.167	35.471	-0.0928821	12.945	22.5246	291.58	-3.25812	0.0405983	0.0217332	46.4678
ICGV-SM 88710	Virginia	2	3	NaSARRI	2020A	R2	15	12	0.69	0.445784	50.1846	0.231717	51.5962	-5.07577	26.6758	-135.4	0.371021	5.70601	30.7343	175.37	-1.36161	0.2443	0.192673	21.1324
SGV 0065	Virginia	2	3	NaSARRI	2020A	R2	8	8.5	0.47	0.460123	39.333	0.208409	51.9557	-0.921769	24.3502	-22.4453	0.146298	10.8932	27.7821	302.637	-2.10607	0.124786	0.083196	33.3293
RedBeauty	Valencia	2	3	NaSARRI	2020A	R2	13	14.5	0.58	0.442922	47.9965	0.242696	51.296	-4.21694	27.2393	-114.867	0.321475	7.15681	31.0128	221.953	-1.4954	0.220856	0.164015	25.7367
ICGV 9555	Spanish	2	3	NaSARRI	2020A	R2	14	16	0.62	0.447277	51.1919	0.249345	52.1374	-5.55893	28.3302	-157.485	0.375987	5.67446	32.4638	184.214	-1.33642	0.257466	0.206925	19.6299
ICGV-SM 95526	Valencia	2	3	NaSARRI	2020A	R2	15	23	0.76	0.416345	62.2445	0.300457	50.4798	-9.95883	31.8339	-317.029	0.512182	0.465603	35.9652	16.7455	-0.970718	0.40251	0.327854	18.5475
ICGV 01504	Spanish	2	3	NaSARRI	2020A	R2	10	15.5	0.57	0.472463	44.9014	0.228578	54.0174	-3.14588	27.1459	-85.3979	0.264982	8.90276	31.2935	278.598	-1.67572	0.190877	0.145438	23.8053
SGV 0080	Virginia	2	3	NaSARRI	2020A	R2	15	8.5	0.53	0.445247	51.8475	0.246483	51.9144	-5.78176	28.0481	-162.168	0.389422	5.22714	32.2021	168.325	-1.30221	0.296916	0.231902	21.8964
ICGV-SM 01709	Virginia	2	3	NaSARRI	2020A	R2	14	8.5	0.61	0.462105	51.9485	0.230343	53.4756	-5.87109	27.4932	-161.415	0.399897	4.98517	32.056	159.805	-1.28394	0.275125	0.218186	20.6956
SGV 0075	Virginia	2	3	NaSARRI	2020A	R2	10	10	0.51	0.443207	46.4572	0.228139	50.979	-3.61495	25.915	-93.6814	0.302323	7.49436	29.6058	221.876	-1.56201	0.211106	0.15594	26.1319
Serenut 5R	Virginia	2	4	NaSARRI	2020A	R2	7	9	0.44	0.480821	39.4166	0.179823	53.7508	-1.42758	22.755	-32.4847	0.192798	9.5857	26.6381	255.345	-1.9512	0.138227	0.0908524	34.2731
SGV 0084	Virginia	2	4	NaSARRI	2020A	R2	17	12	0.67	0.436837	58.9216	0.232733	51.2399	-7.99956	27.0703	-216.55	0.499007	1.61839	31.5988	51.1393	-1.03992	0.329621	0.267121	18.961
ICGV-SM 96714	Valencia	2	4	NaSARRI	2020A	R2	16	14	0.55	0.44426	46.7273	0.222705	51.0285	-3.73454	25.5361	-95.3655	0.312814	7.17242	29.2874	210.061	-1.53406	0.214224	0.154325	27.9612
ICGV 01515	Spanish	2	4	NaSARRI	2020A	R2	13	15	0.62	0.440825	49.2095	0.233588	51.0144	-4.67776	26.5066	-123.992	0.352827	6.17995	30.3726	187.701	-1.41123	0.240544	0.186853	22.3205
Acholi White	Valencia	2	4	NaSARRI	2020A	R2	12	18	0.64	0.440631	52.3693	0.223254	51.0462	-5.76275	25.9193	-149.367	0.413851	4.38127	30.052	131.666	-1.25356	0.26849	0.208733	22.2568
ICGV 01514	Spanish	2	4	NaSARRI	2020A	R2	11	13.5	0.49	0.491119	41.587	0.193245	55.1802	-2.10822	24.5141	-51.6811	0.225051	9.4321	28.7677	271.34	-1.82929	0.149713	0.100724	32.7217
Serenut 14R	Virginia	2	4	NaSARRI	2020A	R2	0
ICGV-SM 95714	Valencia	2	4	NaSARRI	2020A	R2	13	13.5	0.56	0.443859	51.1243	0.239186	51.5823	-5.45091	27.3014	-148.818	0.38225	5.40122	31.3811	169.497	-1.32626	0.268049	0.195226	27.1678
ICGV-SM 01731	Virginia	2	4	NaSARRI	2020A	R2	15	11.5	0.58	0.462791	53.9548	0.223424	53.5676	-6.53336	27.0915	-176.999	0.435141	3.86766	31.8328	123.118	-1.19801	0.289414	0.237392	17.9749
B7-30-9-3	Spanish	2	4	NaSARRI	2020A	R2	12	11.5	0.61	0.457435	48.1028	0.229603	52.6668	-4.3604	26.8405	-117.035	0.332935	6.88883	30.9722	213.362	-1.46954	0.233671	0.175751	24.7868
JL 24	Spanish	2	5	NaSARRI	2020A	R2	5	11.5	0.35	0.475668	37.3413	0.1752	53.002	-0.706024	21.9889	-15.5247	0.143999	10.2677	25.6031	262.886	-2.13469	0.105172	0.0677177	35.6124
SGV 0047	Virginia	2	5	NaSARRI	2020A	R2	16	13.5	0.61	0.45269	51.6664	0.204705	51.9866	-5.5228	24.8211	-137.082	0.416209	4.34718	29.1595	126.762	-1.25935	0.259496	0.205381	20.8536
Serenut 6T	Spanish	2	5	NaSARRI	2020A	R2	8	9.5	0.41	0.467202	38.1653	0.195866	52.4439	-0.644239	23.4761	-15.1243	0.130909	10.9698	26.9694	295.85	-2.17295	0.112558	0.0734715	34.7254
SGV 0023	Virginia	2	5	NaSARRI	2020A	R2	10	10	0.43	0.4493	44.0379	0.212075	51.2118	-2.78404	24.6337	-68.5812	0.266315	8.2099	28.2844	232.212	-1.68423	0.185047	0.132537	28.3767
ICGV-SM 16501	Spanish	2	5	NaSARRI	2020A	R2	16	7.5	0.34	0.481158	38.0231	0.188085	53.7965	-0.732333	23.3501	-17.1	0.138131	10.8833	27.0981	294.916	-2.14823	0.106165	0.0689196	35.0828
ICGV-SM 16520	Spanish	2	5	NaSARRI	2020A	R2	10	10.5	0.48	0.463102	48.3291	0.21978	53.1351	-4.47723	26.2893	-117.703	0.344843	6.52922	30.5759	199.637	-1.44151	0.215299	0.161798	24.8497
SGV 10005	Spanish	2	5	NaSARRI	2020A	R2	14	12.5	0.37	0.450116	40.8065	0.204543	50.9471	-1.56607	23.7494	-37.1931	0.195024	9.61166	27.146	260.918	-1.92927	0.149546	0.109609	26.7054
Serenut 7T	Virginia	2	5	NaSARRI	2020A	R2	8	10	0.41	0.44473	41.4115	0.201518	50.3754	-1.82922	23.3287	-42.6734	0.216318	9.00765	26.6879	240.395	-1.85734	0.155965	0.108521	30.42
ICGV 02501	Spanish	2	5	NaSARRI	2020A	R2	13	13	0.55	0.464141	48.936	0.215227	53.2114	-4.70293	25.9892	-122.226	0.359895	6.08256	30.3523	184.62	-1.40226	0.238779	0.169814	28.882
SGV 07010	Virginia	2	5	NaSARRI	2020A	R2	14	6	0.56	0.451489	49.7206	0.217632	51.9454	-4.89964	25.7035	-125.938	0.373358	5.60187	29.8655	167.303	-1.36431	0.250093	0.193089	22.793
SGV 10010 ER	Spanish	1	1	NaSARRI	2020A	R2	11	5.5	0.32	0.512718	39.0764	0.173791	56.9563	-1.43382	23.356	-33.4883	0.188742	10.0483	27.7624	278.965	-1.96701	0.126739	0.0877492	30.7637
Serenut 14R	Virginia	1	1	NaSARRI	2020A	R2	0
DOK 1T	Spanish	1	1	NaSARRI	2020A	R2	3	5	0.23	0.499971	29.6951	0.138384	54.551	1.19159	18.9845	22.6218	-0.0203897	11.8102	22.3448	263.896	-2.87438	0.0559748	0.0382009	31.7534
ICGV SM 03590	Spanish	1	1	NaSARRI	2020A	R2	3	6	0.36	0.477493	28.1995	0.137382	52.1374	1.64186	18.1007	29.7188	-0.0735281	11.903	21.0129	250.117	-3.15692	0.0374047	0.017517	53.169
ICGV 02501	Spanish	1	1	NaSARRI	2020A	R2	12	10.5	0.55	0.425802	54.6694	0.242772	49.9109	-6.56245	27.009	-177.245	0.437497	3.57827	30.9573	110.774	-1.1817	0.29016	0.222318	23.3806
SGV 0080	Virginia	1	1	NaSARRI	2020A	R2	13	8	0.57	0.424694	60.0933	0.236625	50.0422	-8.23896	26.8898	-221.544	0.511447	1.14999	31.2092	35.8903	-1.00966	0.33996	0.277435	18.3918
JL 24	Spanish	1	1	NaSARRI	2020A	R2	5	10	0.42	0.471983	42.1586	0.200494	53.3173	-2.20988	24.4478	-54.0267	0.232114	9.12581	28.3897	259.079	-1.802	0.155094	0.101373	34.6377
Acholi White	Valencia	1	1	NaSARRI	2020A	R2	7	12.5	0.49	0.463134	42.1204	0.211815	52.5386	-2.0392	25.0258	-51.0327	0.216583	9.56486	28.7659	275.142	-1.84796	0.160201	0.113374	29.2299
ICGV-SM 16502	Spanish	1	1	NaSARRI	2020A	R2	14	13	0.52	0.428686	53.4353	0.250264	50.2743	-6.22734	27.6574	-172.232	0.414355	4.32492	31.5584	136.487	-1.23553	0.28075	0.210401	25.0575
SGV 0060	Virginia	1	1	NaSARRI	2020A	R2	12	6	0.45	0.423623	53.8238	0.235346	49.4841	-6.18345	26.2299	-162.191	0.429975	3.80218	30.0796	114.368	-1.20546	0.293036	0.234346	20.0283
SGV 0075	Virginia	1	2	NaSARRI	2020A	R2	17	13.5	0.65	0.433776	63.0128	0.251662	51.5475	-9.61407	28.8657	-277.517	0.537697	-0.0114234	33.6131	-0.383978	-0.941578	0.370133	0.306351	17.232
ICGV 01502	Spanish	1	2	NaSARRI	2020A	R2	20	13	0.6	0.407107	57.6536	0.251413	48.1847	-7.4417	26.9958	-200.895	0.476427	2.21866	30.7095	68.1339	-1.08265	0.337848	0.267316	20.8769
SGV 07010	Virginia	1	2	NaSARRI	2020A	R2	9	10.5	0.41	0.445489	41.2256	0.202487	50.4582	-1.74617	23.4323	-40.9167	0.209804	9.17856	26.7862	245.859	-1.87906	0.150241	0.108621	27.7019
Serenut 5R	Virginia	1	2	NaSARRI	2020A	R2	3	7.5	0.34	0.448339	36.3848	0.19038	50.249	-0.0155948	22.1217	-0.344983	0.0877886	11.1467	25.1349	280.172	-2.35396	0.0932677	0.0677521	27.3574
12CS-015	Spanish	1	2	NaSARRI	2020A	R2	11	9.5	0.41	0.457753	47.716	0.216276	52.454	-4.20768	25.6937	-108.111	0.337051	6.64036	29.821	198.022	-1.46652	0.219609	0.169137	22.983
DOK 1R	Spanish	1	2	NaSARRI	2020A	R2	14	11.5	0.59	0.459875	45.9812	0.210382	52.4608	-3.57702	25.1267	-89.8788	0.308178	7.33485	29.1569	213.861	-1.55515	0.211472	0.15735	25.5929
B7-30-9-3	Spanish	1	2	NaSARRI	2020A	R2	12	12	0.59	0.45543	53.0513	0.22978	52.8214	-6.21265	27.2236	-169.131	0.418899	4.34204	31.7333	137.787	-1.23543	0.273376	0.213898	21.7571
ICGV-SM 08556	Spanish	1	2	NaSARRI	2020A	R2	16	18.5	0.47	0.440145	56.3758	0.241834	51.5997	-7.31097	27.7938	-203.2	0.46038	2.89696	32.2045	93.2951	-1.12518	0.302785	0.233717	22.811
Serenut 7T	Virginia	1	2	NaSARRI	2020A	R2	5	10.5	0.41	0.486464	41.3724	0.191889	54.6593	-2.04246	24.2017	-49.431	0.223348	9.36078	28.3546	265.422	-1.83634	0.149712	0.104202	30.3985
ICGV-SM 01709	Virginia	1	2	NaSARRI	2020A	R2	16	12	0.46	0.425125	51.5839	0.233822	49.4693	-5.40407	25.9882	-140.442	0.395407	4.82695	29.7025	143.372	-1.2958	0.26735	0.210577	21.2356
ICGV-SM 95526	Valencia	1	3	NaSARRI	2020A	R2	19	20.5	0.48	0.441447	66.1599	0.268955	53.022	-11.3454	31.0697	-352.499	0.568715	-1.63008	36.273	-59.128	-0.864788	0.410609	0.33956	17.3032
ICGV-SM 95355	Virginia	1	3	NaSARRI	2020A	R2	5	12	0.53	0.44276	48.4987	0.212169	50.8264	-4.40415	24.758	-109.038	0.358339	5.87397	28.6485	168.28	-1.41002	0.237581	0.188579	20.6252
Serenut 6T	Spanish	1	3	NaSARRI	2020A	R2	13	12	0.45	0.433902	46.1596	0.220834	49.834	-3.46892	24.853	-86.2129	0.304818	7.20263	28.35	204.195	-1.56012	0.198204	0.166288	16.103
ICGV-SM 16520	Spanish	1	3	NaSARRI	2020A	R2	17	15	0.5	0.422537	48.3349	0.22958	48.8862	-4.20824	25.2315	-106.18	0.3422	6.21656	28.6462	178.081	-1.4453	0.230657	0.187427	18.742
ICGV 01504	Spanish	1	3	NaSARRI	2020A	R2	18	12.5	0.57	0.434332	61.3352	0.24949	51.4465	-9.01808	28.5643	-257.596	0.519308	0.724535	33.2017	24.0558	-0.983543	0.363548	0.305012	16.1014
SGV 0805	Valencia	1	3	NaSARRI	2020A	R2	8	14	0.43	0.477528	45.2032	0.208004	54.2498	-3.37985	25.6075	-86.5495	0.292113	7.94227	29.923	237.657	-1.60418	0.180893	0.139529	22.8665
ICGV-SM 01731	Virginia	1	3	NaSARRI	2020A	R2	17	10	0.49	0.43058	51.1153	0.228523	49.9474	-5.27472	25.7687	-135.923	0.391638	4.95907	29.5806	146.692	-1.30904	0.261233	0.213006	18.4612
ICGV-SM 95714	Valencia	1	3	NaSARRI	2020A	R2	13	12	0.58	0.456933	59.4015	0.243501	53.6986	-8.6132	29.0485	-250.2	0.497298	1.60251	34.0876	54.6259	-1.03599	0.341137	0.274967	19.3968
Serenut 11T	Virginia	1	3	NaSARRI	2020A	R2	6	10.5	0.47	0.444608	45.4712	0.211521	50.8015	-3.30457	24.5167	-81.017	0.298708	7.37303	28.1966	207.895	-1.58405	0.197881	0.157788	20.2613
Serenut 8R	Virginia	1	3	NaSARRI	2020A	R2	8	9	0.26	0.515224	31.0844	0.137779	56.1875	0.69454	19.5028	13.5455	0.0308416	11.414	23.2038	264.849	-2.6285	0.0755726	0.0534922	29.2174
ICGV-SM 99568	Spanish	1	4	NaSARRI	2020A	R2	12	9	0.4	0.423712	52.2505	0.236412	49.3988	-5.63249	26.1805	-147.461	0.404261	4.56773	29.9069	136.607	-1.27091	0.27138	0.216487	20.2272
ICGV-SM 88710	Virginia	1	4	NaSARRI	2020A	R2	16	11	0.57	0.448823	59.1705	0.236839	52.6567	-8.30359	28.0332	-232.776	0.49836	1.61563	32.8603	53.0902	-1.03818	0.325685	0.26747	17.8745
SGV 0071	Virginia	1	4	NaSARRI	2020A	R2	9	9.5	0.52	0.455122	50.6868	0.216559	52.3862	-5.25926	25.864	-136.026	0.389702	5.1694	30.1785	156.005	-1.32061	0.249996	0.210153	15.9374
SGV 0084	Virginia	1	4	NaSARRI	2020A	R2	15	10	0.5	0.490301	48.1807	0.196147	55.6224	-4.59082	25.3526	-116.389	0.361358	6.1307	30.1745	184.991	-1.40974	0.225064	0.183727	18.3669
ICGV 01514	Spanish	1	4	NaSARRI	2020A	R2	11	11	0.4	0.439525	45.9144	0.217959	50.3826	-3.42668	24.8665	-85.2095	0.302234	7.30778	28.4667	208.028	-1.56932	0.204857	0.156876	23.4218
RedBeauty	Valencia	1	4	NaSARRI	2020A	R2	14	20	0.67	0.454589	66.6944	0.25975	54.343	-11.5704	31.0404	-359.149	0.576479	-1.90045	36.6255	-69.605	-0.853238	0.412921	0.33365	19.1976
ICGV-SM 03702	Virginia	1	4	NaSARRI	2020A	R2	15	9.5	0.62	0.44361	66.579	0.246294	52.8113	-10.9353	29.2572	-319.937	0.579491	-1.69404	34.5286	-58.493	-0.855247	0.406867	0.34083	16.2308
SGV 0023	Virginia	1	4	NaSARRI	2020A	R2	8	10.5	0.49	0.45245	51.3656	0.215351	52.1238	-5.46932	25.7007	-140.565	0.402196	4.7836	30.0125	143.568	-1.28851	0.26076	0.219875	15.679
SGV 990400	Virginia	1	4	NaSARRI	2020A	R2	4	11	0.28	0.438083	37.3259	0.20216	49.3691	-0.176293	22.7354	-4.00808	0.0983865	11.1038	25.6019	284.279	-2.30388	0.10853	0.0817283	24.695
ICGV-SM 16501	Spanish	1	4	NaSARRI	2020A	R2	13	11	0.48	0.419029	50.4541	0.228623	48.6326	-4.93654	25.1753	-124.279	0.381626	5.13146	28.6831	147.186	-1.33655	0.250987	0.198	21.1116
ICGVS-SM 0205	Spanish	1	5	NaSARRI	2020A	R2	7	10	0.28	0.429363	39.1757	0.214381	48.7312	-0.736966	23.5038	-17.3215	0.137632	10.5516	26.3207	277.727	-2.13919	0.135873	0.0756387	44.3313
ICGV 9555	Spanish	1	5	NaSARRI	2020A	R2	15	11.5	0.55	0.433047	47.8319	0.23059	50.0167	-4.09454	25.7621	-105.484	0.330207	6.6671	29.3552	195.714	-1.47848	0.216893	0.172966	20.2527
SGV 10005	Spanish	1	5	NaSARRI	2020A	R2	9	11.5	0.46	0.442539	39.3861	0.203425	50.0203	-1.00851	23.2093	-23.4068	0.159293	10.1337	26.3432	266.954	-2.06147	0.126203	0.0894801	29.0983
ICGV 01515	Spanish	1	5	NaSARRI	2020A	R2	15	12.5	0.53	0.428439	46.6659	0.228348	49.3877	-3.59943	25.2587	-90.9169	0.308086	7.14243	28.6582	204.689	-1.54561	0.222476	0.165991	25.3892
Serenut 4T	Spanish	1	5	NaSARRI	2020A	R2	12	12.5	0.5	0.46952	50.1362	0.209911	53.7834	-5.16168	25.8769	-133.568	0.384641	5.40013	30.4504	164.436	-1.33782	0.248722	0.198424	20.2223
ICGV 01510	Spanish	1	5	NaSARRI	2020A	R2	19	12.5	0.62	0.439505	61.111	0.24726	51.966	-8.98454	28.6221	-257.157	0.517244	0.820206	33.3707	27.3708	-0.989282	0.359051	0.285483	20.4896
Serenut 9T	Virginia	1	5	NaSARRI	2020A	R2	8	12	0.43	0.4469	40.942	0.20402	50.6089	-1.62895	23.5844	-38.4177	0.200581	9.42513	26.9369	253.883	-1.91025	0.149863	0.105861	29.3613
ICGV-SM 96714	Valencia	1	5	NaSARRI	2020A	R2	17	13	0.55	0.430051	53.7643	0.239079	50.2563	-6.27974	26.8414	-168.557	0.4267	3.94233	30.8287	121.537	-1.21102	0.279201	0.222767	20.2126
SGV 0065	Virginia	1	5	NaSARRI	2020A	R2	14	8.5	0.43	0.45128	47.972	0.210764	51.6864	-4.25965	24.966	-106.346	0.348026	6.22156	28.9881	180.351	-1.4394	0.221732	0.176208	20.5311
SGV 0047	Virginia	1	5	NaSARRI	2020A	R2	14	8.5	0.49	0.433474	48.4087	0.215358	49.8633	-4.30912	24.6042	-106.023	0.354967	5.8891	28.29	166.603	-1.41785	0.238478	0.182219	23.5911
ICGV-SM 03702	Virginia	2	1	NaSARRI	2020A	R2	12	11.5	0.55	0.44949	56.2456	0.233258	52.4608	-7.29009	27.5163	-200.596	0.463051	2.87146	32.1402	92.2894	-1.12366	0.314683	0.242552	22.9218
Serenut 4T	Spanish	2	1	NaSARRI	2020A	R2	11	14	0.56	0.456658	53.3004	0.235966	53.0852	-6.35829	27.8345	-176.98	0.41817	4.38178	32.3853	141.905	-1.2332	0.290841	0.21354	26.5784
ICGV-SM 99568	Spanish	2	1	NaSARRI	2020A	R2	8	12.5	0.48	0.448189	46.1782	0.215143	51.2925	-3.58071	25.0277	-89.6172	0.309419	7.21081	28.8329	207.908	-1.54909	0.202265	0.155698	23.0227
ICGV SM 03590	Spanish	2	1	NaSARRI	2020A	R2	7	10	0.29	0.445379	40.9574	0.205268	50.4618	-1.60488	23.6151	-37.8995	0.198694	9.46237	26.9337	254.857	-1.91627	0.169327	0.127154	24.9061
12CS-015	Spanish	2	1	NaSARRI	2020A	R2	13	11	0.59	0.421749	55.031	0.246274	49.547	-6.67157	27.1144	-180.895	0.441073	3.4389	30.9889	106.568	-1.17085	0.31121	0.246805	20.6949
ICGV-SM 16502	Spanish	2	1	NaSARRI	2020A	R2	15	15.5	0.62	0.462025	58.8711	0.240426	54.1564	-8.43735	28.9834	-244.543	0.491263	1.85753	34.0975	63.3373	-1.0516	0.339119	0.275935	18.6317
SGV 0805	Valencia	2	1	NaSARRI	2020A	R2	10	16	0.55	0.45788	48.8598	0.220781	52.6264	-4.65038	26.1918	-121.802	0.354899	6.20341	30.4149	188.676	-1.41278	0.231436	0.187101	19.1565
Serenut 9T	Virginia	2	1	NaSARRI	2020A	R2	12	13	0.51	0.426559	49.6121	0.228724	49.4025	-4.70205	25.4654	-119.74	0.365897	5.63108	29.0703	163.697	-1.37899	0.250805	0.191283	23.7324
ICGV-SM 08556	Spanish	2	1	NaSARRI	2020A	R2	11	17.5	0.67	0.431506	56.2299	0.245687	50.7089	-7.20768	27.6751	-199.473	0.457472	2.94894	31.8706	93.9845	-1.13027	0.310403	0.266019	14.299
Serenut 11T	Virginia	2	1	NaSARRI	2020A	R2	12	11	0.26	0.463572	37.2475	0.194345	51.9729	-0.281718	23.1217	-6.51379	0.105044	11.3192	26.4668	299.582	-2.27811	0.111975	0.0829136	25.9535
ICGV 01502	Spanish	2	2	NaSARRI	2020A	R2	15	13	0.56	0.432185	52.1428	0.260534	50.7374	-5.83386	28.5645	-166.641	0.386112	5.26247	32.398	170.493	-1.303	0.297213	0.227764	23.3666
SGV 990400	Virginia	2	2	NaSARRI	2020A	R2	9	14.5	0.5	0.477889	43.2221	0.212001	54.1951	-2.53527	25.7815	-65.3629	0.241177	9.26406	29.9088	277.077	-1.76361	0.183742	0.141853	22.7978
SGV 0071	Virginia	2	2	NaSARRI	2020A	R2	14	10	0.58	0.411114	50.979	0.255306	48.2233	-5.15638	26.9346	-138.885	0.372088	5.4539	30.2153	164.791	-1.34578	0.266877	0.216415	18.9086
ICGV 01510	Spanish	2	2	NaSARRI	2020A	R2	16	8	0.5	0.433202	45.7732	0.236923	49.9729	-3.26082	26.0979	-85.1004	0.280698	8.00846	29.487	236.146	-1.62357	0.217361	0.173367	20.2401
ICGV-SM 95355	Virginia	2	2	NaSARRI	2020A	R2	11	8.5	0.53	0.422805	47.7358	0.247657	49.1491	-3.95775	26.6274	-105.384	0.313929	7.13629	29.9212	213.526	-1.51598	0.244292	0.202534	17.0936
DOK 1R	Spanish	2	2	NaSARRI	2020A	R2	11	9	0.57	0.428998	50.3125	0.25046	50.0786	-5.04187	27.4176	-138.236	0.361146	5.93443	31.0614	184.332	-1.37773	0.279654	0.206544	26.1431
ICGVS-SM 0205	Spanish	2	2	NaSARRI	2020A	R2	8	8.5	0.41	0.43361	36.7098	0.223635	49.1117	0.515643	24.1703	12.4633	0.0392913	12.7047	26.7677	340.075	-2.55409	0.105294	0.0743084	29.4278
Serenut 8R	Virginia	2	2	NaSARRI	2020A	R2	6	5	0.28	0.424276	35.6319	0.223322	48.0147	0.998472	23.6315	23.5953	0.000129283	13.0902	25.9488	339.675	-2.74479	0.097115	0.0709558	26.9363
SGV 10010 ER	Spanish	2	2	NaSARRI	2020A	R2	13	7.5	0.45	0.438741	42.8071	0.222911	50.1403	-2.1756	24.9483	-54.2777	0.225829	9.14979	28.2436	258.423	-1.81117	0.185618	0.148011	20.2604
SGV 0060	Virginia	2	2	NaSARRI	2020A	R2	11	9.5	0.48	0.429645	46.6111	0.228281	49.5174	-3.60127	25.3019	-91.1191	0.307745	7.16617	28.7262	205.856	-1.54665	0.225592	0.178206	21.0052
DOK 1T	Spanish	2	3	NaSARRI	2020A	R2	6	9.5	0.28	0.469287	35.1435	0.231922	52.875	1.60717	26.248	42.1849	-0.0473592	15.5708	29.2402	455.295	-2.98656	0.0811013	0.0466879	42.4326
ICGV-SM 88710	Virginia	2	3	NaSARRI	2020A	R2	14	11.5	0.45	0.44472	44.5561	0.256752	51.4255	-2.65879	28.1387	-74.8147	0.230131	9.80853	31.5388	309.35	-1.77505	0.217954	0.173304	20.4856
SGV 0065	Virginia	2	3	NaSARRI	2020A	R2	14	7.5	0.44	0.432393	43.5741	0.257943	50.0167	-2.16791	27.518	-59.6565	0.206473	10.168	30.5572	310.707	-1.85726	0.209566	0.167384	20.1282
RedBeauty	Valencia	2	3	NaSARRI	2020A	R2	15	16.5	0.61	0.433793	50.9353	0.280029	51.1484	-5.42902	30.1077	-163.456	0.351921	6.4493	33.7693	217.789	-1.38484	0.283749	0.213885	24.6219
ICGV 9555	Spanish	2	3	NaSARRI	2020A	R2	16	8.5	0.46	0.439494	43.5371	0.265431	50.8975	-2.11056	28.4722	-60.0923	0.196979	10.7018	31.5998	338.176	-1.88609	0.201716	0.151717	24.7866
ICGV-SM 95526	Valencia	2	3	NaSARRI	2020A	R2	20	16.5	0.57	0.420691	54.1795	0.293673	50.1911	-6.76702	30.7936	-208.381	0.402847	4.67143	34.3736	160.574	-1.23916	0.330796	0.264395	20.0732
ICGV 01504	Spanish	2	3	NaSARRI	2020A	R2	16	13	0.51	0.461115	45.0867	0.254715	53.2214	-3.00105	28.8474	-86.5727	0.243606	9.73049	32.6593	317.791	-1.72971	0.221021	0.170614	22.8063
SGV 0080	Virginia	2	3	NaSARRI	2020A	R2	13	12	0.54	0.440236	46.061	0.194427	50.1113	-3.53564	22.9715	-81.2188	0.32978	6.35985	26.6328	169.381	-1.50391	0.291959	0.236642	18.9469
ICGV-SM 01709	Virginia	2	3	NaSARRI	2020A	R2	14	7	0.46	0.421018	46.1197	0.249041	48.8485	-3.29361	26.4986	-87.2762	0.278876	8.02719	29.6038	237.635	-1.62252	0.242734	0.190441	21.5433
SGV 0075	Virginia	2	3	NaSARRI	2020A	R2	13	9.5	0.39	0.457854	43.2013	0.242245	52.515	-2.20333	27.451	-60.4837	0.208997	10.3075	31.0661	320.213	-1.85552	0.197645	0.156133	21.0031
Serenut 5R	Virginia	2	4	NaSARRI	2020A	R2	8	7	0.32	0.434982	37.1664	0.297648	50.2346	1.89074	30.0561	56.8283	-0.0610823	17.2454	31.9758	551.435	-3.06547	0.131058	0.0887564	32.2768
SGV 0084	Virginia	2	4	NaSARRI	2020A	R2	16	8.5	0.47	0.427066	41.7487	0.298343	49.8377	-0.791677	30.196	-23.9054	0.112023	13.2086	32.5524	429.973	-2.20023	0.195059	0.149718	23.2447
ICGV-SM 96714	Valencia	2	4	NaSARRI	2020A	R2	13	8	0.38	0.465313	39.0186	0.269615	53.3272	0.31295	29.6201	9.2696	0.0453392	15.0328	32.6881	491.393	-2.50442	0.142331	0.104941	26.2702
ICGV 01515	Spanish	2	4	NaSARRI	2020A	R2	15	8	0.41	0.457691	38.9371	0.280472	52.65	0.565287	30.1138	17.0229	0.0284605	15.5378	32.9095	511.341	-2.58264	0.139142	0.0948002	31.8678
Acholi White	Valencia	2	4	NaSARRI	2020A	R2	9	7	0.41	0.46285	34.5483	0.25179	52.3828	2.4674	27.5111	67.8808	-0.112688	17.358	30.124	522.893	-3.37659	0.0851737	0.0538954	36.723
ICGV 01514	Spanish	2	4	NaSARRI	2020A	R2	12	10.5	0.39	0.444721	37.4497	0.284535	51.152	1.46478	29.5848	43.3353	-0.0319219	16.527	31.8929	527.095	-2.8975	0.121464	0.0820322	32.4639
Serenut 14R	Virginia	2	4	NaSARRI	2020A	R2	0
ICGV-SM 95714	Valencia	2	4	NaSARRI	2020A	R2	11	9	0.48	0.450688	40.3141	0.27461	51.9488	-0.341338	29.4305	-10.0458	0.0871796	13.8225	32.3307	446.891	-2.31458	0.160264	0.115764	27.7668
ICGV-SM 01731	Virginia	2	4	NaSARRI	2020A	R2	10	10.5	0.45	0.442214	40.074	0.259797	50.798	-0.445511	27.7754	-12.3742	0.0989368	12.8992	30.615	394.91	-2.27158	0.148883	0.114557	23.0555
B7-30-9-3	Spanish	2	4	NaSARRI	2020A	R2	14	11	0.44	0.435371	43.9317	0.273941	50.6053	-2.19198	28.9721	-63.5062	0.198481	10.7444	31.9855	343.667	-1.87626	0.206592	0.153211	25.8391
JL 24	Spanish	2	5	NaSARRI	2020A	R2	7	5.5	0.44	0.425042	36.1205	0.307429	49.1604	2.72979	30.109	82.1912	-0.121906	18.4018	31.562	580.798	-3.45785	0.107221	0.0779789	27.2727
SGV 0047	Virginia	2	5	NaSARRI	2020A	R2	8	6	0.31	0.450076	33.8004	0.283077	51.3276	3.75596	29.3	110.05	-0.207651	19.9388	31.2033	622.156	-4.08838	0.0678602	0.0512245	24.5146
Serenut 6T	Spanish	2	5	NaSARRI	2020A	R2	11	6	0.32	0.43212	36.5195	0.293641	49.801	2.19593	29.5045	64.7899	-0.0844929	17.4415	31.3317	546.473	-3.20838	0.104685	0.0785703	24.9459
SGV 0023	Virginia	2	5	NaSARRI	2020A	R2	14	5.5	0.42	0.432569	37.8835	0.287784	49.9145	1.25466	29.2407	36.6872	-0.0175713	15.9287	31.3325	499.085	-2.82015	0.143	0.104081	27.2164
ICGV-SM 16501	Spanish	2	5	NaSARRI	2020A	R2	10	6	0.29	0.438632	36.6546	0.285683	50.4222	1.95671	29.2455	57.2251	-0.0676389	17.0543	31.3159	534.069	-3.10388	0.098879	0.0608727	38.4372
ICGV-SM 16520	Spanish	2	5	NaSARRI	2020A	R2	14	9	0.36	0.437663	39.6841	0.297182	50.7802	0.383161	30.46	11.6711	0.0396977	15.1815	32.777	497.605	-2.52527	0.151567	0.110347	27.196
SGV 10005	Spanish	2	5	NaSARRI	2020A	R2	10	6.5	0.26	0.459129	29.9254	0.200309	50.979	3.25836	22.6946	73.9471	-0.221015	16.3412	25.1568	411.093	-4.12587	0.069291	0.0486529	29.7847
Serenut 7T	Virginia	2	5	NaSARRI	2020A	R2	5	8.5	0.33	0.498548	31.1343	0.191539	55.0829	2.56559	23.6011	60.5507	-0.142096	16.0716	26.8876	432.126	-3.55104	0.0810491	0.059232	26.9184
ICGV 02501	Spanish	2	5	NaSARRI	2020A	R2	15	11	0.39	0.447083	43.3613	0.286468	52.0244	-1.83065	30.5447	-55.9166	0.169625	12.0185	33.6308	404.192	-1.97456	0.193954	0.142517	26.5202
SGV 07010	Virginia	2	5	NaSARRI	2020A	R2	11	7	0.45	0.404595	44.3806	0.30516	47.6876	-2.0742	29.7191	-61.6435	0.187489	10.8965	31.8396	346.939	-1.90201	0.223857	0.16978	24.157
SGV 10010 ER	Spanish	1	1	Nakabango	2020A	R2	10	11.2	0.41	0.342716	17.1506	0.136139	37.2902	4.65285	13.1083	60.991	-0.772646	12.6527	13.3989	169.532	-14.3466	0.117991	0.110673	6.2023
Serenut 14R	Virginia	1	1	Nakabango	2020A	R2	6	8.4	0.56	0.330909	18.9602	0.161655	36.2234	5.15114	14.3522	73.9303	-0.813864	13.7847	14.3419	197.699	-17.4205	0.108578	0.0996446	8.22762
DOK 1T	Spanish	1	1	Nakabango	2020A	R2	8	9.3	0.5	0.32326	22.7467	0.178335	35.7119	4.34257	15.3342	66.5896	-0.557485	13.0387	15.3189	199.737	-8.34018	0.118395	0.105617	10.7928
ICGV SM 03590	Spanish	1	1	Nakabango	2020A	R2	5	7.2	0.48	0.324066	14.7767	0.148357	35.1719	6.0034	13.0397	78.2828	-1.24519	14.2367	12.789	182.073	58.1318	0.0737246	0.0662551	10.1316
ICGV 02501	Spanish	1	1	Nakabango	2020A	R2	8	10	0.565	0.325678	26.4247	0.171582	36.1709	2.73265	15.328	41.8859	-0.254889	10.8831	15.6891	170.746	-4.4045	0.149895	0.139504	6.93213
SGV 0080	Virginia	1	1	Nakabango	2020A	R2	6	9	0.48	0.322841	16.6525	0.157251	35.184	5.75281	13.6409	78.4737	-1.06947	14.1661	13.4033	189.872	-112.014	0.0948117	0.0868601	8.38666
JL 24	Spanish	1	1	Nakabango	2020A	R2	5	7.6	0.44	0.32113	13.1703	0.155596	34.7623	7.09788	13.2075	93.7452	-1.71539	15.7673	12.686	200.024	13.1904	0.066465	0.0614908	7.48388
Acholi White	Valencia	1	1	Nakabango	2020A	R2	6	8.7	0.46	0.313256	18.9837	0.167635	34.3273	5.19768	14.0842	73.2054	-0.849171	13.4923	13.7816	185.946	-20.3782	0.0878649	0.0779306	11.3064
ICGV-SM 16502	Spanish	1	1	Nakabango	2020A	R2	13	13	0.62	0.342723	36.3958	0.183486	38.7378	-0.228645	17.4573	-3.99153	0.131505	7.96323	18.6643	148.628	-2.19019	0.194534	0.178211	8.3907
SGV 0060	Virginia	1	1	Nakabango	2020A	R2	7	13	0.52	0.326785	16.2545	0.148743	35.557	5.47691	13.2744	72.7029	-1.01777	13.6677	13.1638	179.919	-52.0706	0.0951423	0.0858312	9.78652
SGV 0075	Virginia	1	2	Nakabango	2020A	R2	12	7	0.555	0.328585	31.1277	0.189078	36.9129	1.55388	16.8565	26.1928	-0.0679495	9.99037	17.4417	174.249	-3.12756	0.177508	0.166953	5.94621
ICGV 01502	Spanish	1	2	Nakabango	2020A	R2	11	8.5	0.52	0.322725	30.8983	0.186504	36.2234	1.57	16.4558	25.8356	-0.0717624	9.77877	16.9453	165.704	-3.14995	0.169218	0.156604	7.45434
SGV 07010	Virginia	1	2	Nakabango	2020A	R2	4	5	0.465	0.305761	18.5815	0.167363	33.4793	5.21114	13.7963	71.8944	-0.87868	13.2737	13.3767	177.558	-23.2556	0.0830039	0.0724146	12.7576
Serenut 5R	Virginia	1	2	Nakabango	2020A	R2	5	7.2	0.47	0.336461	9.03388	0.130226	36.1008	7.3462	11.9465	87.761	-2.26639	15.7022	11.6149	182.38	8.52441	0.0652338	0.0607112	6.93299
12CS-015	Spanish	1	2	Nakabango	2020A	R2	9	7.2	0.62	0.330235	25.5008	0.178657	36.6679	3.30712	15.8501	52.4184	-0.340711	11.9466	16.1512	192.952	-5.20655	0.136336	0.127472	6.50118
DOK 1R	Spanish	1	2	Nakabango	2020A	R2	6	13	0.455	0.348352	12.1494	0.145984	37.5959	7.38568	13.4262	99.1615	-1.81399	16.6548	13.2404	220.516	11.9679	0.0699816	0.0627194	10.3773
B7-30-9-3	Spanish	1	2	Nakabango	2020A	R2	8	8	0.56	0.329961	24.7007	0.181343	36.5991	3.74732	15.9203	59.6585	-0.417113	12.5758	16.1219	202.745	-6.09259	0.131227	0.121701	7.25923
ICGV-SM 08556	Spanish	1	2	Nakabango	2020A	R2	12	13	0.5	0.320548	29.8299	0.183553	35.8953	1.83998	16.1011	29.6258	-0.110082	9.96583	16.5127	164.562	-3.37606	0.150231	0.140048	6.7778
Serenut 7T	Virginia	1	2	Nakabango	2020A	R2	6	9	0.48	0.343203	19.7331	0.177574	37.6842	5.83599	15.7787	92.0843	-0.883876	15.5609	15.7831	245.598	-24.8268	0.0829543	0.0743694	10.349
ICGV-SM 01709	Virginia	1	2	Nakabango	2020A	R2	5	5.1	0.375	0.324103	11.0108	0.14263	34.922	7.17929	12.4223	89.1835	-1.97958	15.5389	11.9516	185.714	10.2385	0.0627156	0.0558337	10.9732
ICGV-SM 95526	Valencia	1	3	Nakabango	2020A	R2	10	4	0.52	0.317824	33.8245	0.195725	35.9248	0.758953	17.0238	12.9203	0.0279233	8.88242	17.5482	155.87	-2.631	0.191693	0.178839	6.7051
ICGV-SM 95355	Virginia	1	3	Nakabango	2020A	R2	5	5.9	0.46	0.330844	17.1922	0.162141	36.1067	5.89376	14.2363	83.9056	-1.04762	14.7473	14.077	207.598	-84.4026	0.0932333	0.0844411	9.43033
Serenut 6T	Spanish	1	3	Nakabango	2020A	R2	6	12.7	0.465	0.324767	14.4583	0.159949	35.2566	6.86989	13.664	93.8698	-1.50624	15.7294	13.2293	208.089	18.6382	0.0758855	0.067237	11.3968
ICGV-SM 16520	Spanish	1	3	Nakabango	2020A	R2	13	6.9	0.55	0.314883	26.8981	0.177214	35.0503	2.59541	15.3154	39.7498	-0.232566	10.5731	15.5066	163.952	-4.22683	0.146193	0.134773	7.81149
ICGV 01504	Spanish	1	3	Nakabango	2020A	R2	10	8.1	0.44	0.317556	27.9114	0.172792	35.3772	2.1569	15.223	32.8344	-0.164495	9.97617	15.5597	155.227	-3.72685	0.139046	0.126231	9.21639
SGV 0805	Valencia	1	3	Nakabango	2020A	R2	8	7.3	0.42	0.304199	21.8891	0.190902	33.628	4.91584	15.2502	74.9676	-0.690967	13.5173	14.7656	199.591	-12.135	0.0981006	0.0905955	7.65042
ICGV-SM 01731	Virginia	1	3	Nakabango	2020A	R2	6	9.1	0.405	0.338986	8.94792	0.142102	36.3685	8.39364	12.6502	106.182	-2.81308	17.5404	12.1373	212.894	6.51312	0.0466294	0.0424514	8.95999
ICGV-SM 95714	Valencia	1	3	Nakabango	2020A	R2	14	12.1	0.52	0.317595	31.5381	0.212802	35.8953	1.98989	17.8348	35.4891	-0.11753	10.8759	18.0336	196.132	-3.42125	0.151967	0.139535	8.18087
Serenut 11T	Virginia	1	3	Nakabango	2020A	R2	8	9	0.45	0.324621	20.9328	0.174722	35.7297	4.92875	15.0378	74.1176	-0.707305	13.7196	14.9409	204.983	-12.4523	0.108354	0.0994666	8.20236
Serenut 8R	Virginia	1	3	Nakabango	2020A	R2	4	9	0.52	0.355586	8.09082	0.134719	38.0617	8.53526	12.6436	107.916	-2.95018	17.9698	12.3187	221.364	6.29708	0.0394524	0.0351778	10.8349
ICGV-SM 99568	Spanish	1	4	Nakabango	2020A	R2	5	10.5	0.545	0.339753	15.6077	0.153348	36.9299	6.22889	13.8891	86.5135	-1.20757	15.1604	13.8091	209.352	79.6232	0.0922362	0.0841003	8.82077
ICGV-SM 88710	Virginia	1	4	Nakabango	2020A	R2	5	11	0.335	0.336839	13.4799	0.159074	36.4898	7.47573	13.9409	104.219	-1.73492	16.8743	13.5603	228.819	12.7201	0.0621089	0.0527495	15.0694
SGV 0071	Virginia	1	4	Nakabango	2020A	R2	12	6.3	0.51	0.339071	26.8713	0.180246	37.7283	2.97269	16.3828	48.7011	-0.273793	11.8276	16.8914	199.786	-4.57123	0.148291	0.136347	8.05431
SGV 0084	Virginia	1	4	Nakabango	2020A	R2	8	8.1	0.425	0.324656	19.0566	0.164987	35.563	5.23024	14.3237	74.9162	-0.838216	13.7998	14.1964	195.908	-19.33	0.1052	0.0956613	9.06728
ICGV 01514	Spanish	1	4	Nakabango	2020A	R2	14	9	0.555	0.324742	31.5573	0.188372	36.5071	1.40623	16.6903	23.4705	-0.0498933	9.68066	17.2416	166.91	-3.02798	0.155508	0.142403	8.42725
RedBeauty	Valencia	1	4	Nakabango	2020A	R2	10	11	0.51	0.326752	30.6431	0.198076	36.7479	1.97525	17.285	34.1422	-0.119591	10.7265	17.7195	190.068	-3.43374	0.145024	0.132092	8.91719
ICGV-SM 03702	Virginia	1	4	Nakabango	2020A	R2	5	6.9	0.34	0.331427	11.7365	0.152744	35.7653	7.74773	13.2511	102.666	-2.07515	16.833	12.7511	214.64	9.27478	0.0545275	0.048808	10.4891
SGV 0023	Virginia	1	4	Nakabango	2020A	R2	10	7	0.545	0.327557	22.867	0.1619	36.1067	3.64598	14.5509	53.0522	-0.444519	11.7885	14.7874	174.322	-6.39569	0.123869	0.115504	6.75298
SGV 990400	Virginia	1	4	Nakabango	2020A	R2	7	11.2	0.53	0.325664	21.0936	0.1685	35.8245	4.56923	14.7306	67.3074	-0.639571	13.1014	14.7391	193.103	-10.1758	0.109377	0.0985216	9.92453
ICGV-SM 16501	Spanish	1	4	Nakabango	2020A	R2	11	7.1	0.405	0.320829	20.5741	0.156009	35.2022	4.12545	13.8188	57.0086	-0.584561	12.0213	13.8707	166.744	-8.73579	0.114615	0.103098	10.049
ICGVS-SM 0205	Spanish	1	5	Nakabango	2020A	R2	7	6.5	0.39	0.332799	13.1134	0.109218	35.9424	4.25634	11.061	47.0794	-0.834461	11.025	11.2858	124.426	-16.9028	0.100831	0.0904022	10.3431
ICGV 9555	Spanish	1	5	Nakabango	2020A	R2	10	9.5	0.46	0.321036	26.2225	0.181816	35.7119	3.10459	15.7396	48.8648	-0.308705	11.5156	15.918	183.304	-4.8929	0.139667	0.128587	7.93334
SGV 10005	Spanish	1	5	Nakabango	2020A	R2	7	9	0.44	0.318565	18.6753	0.154635	34.8362	4.74301	13.5269	64.158	-0.76514	12.6902	13.4283	170.408	-14.4522	0.0928289	0.0827928	10.8114
ICGV 01515	Spanish	1	5	Nakabango	2020A	R2	13	11	0.505	0.321931	29.0393	0.177247	35.9542	1.96052	15.7221	30.8235	-0.130138	9.9775	16.1554	161.19	-3.50143	0.149793	0.139853	6.63627
Serenut 4T	Spanish	1	5	Nakabango	2020A	R2	9	8	0.39	0.32991	19.3332	0.153699	36.1067	4.59397	13.8962	63.8385	-0.697709	12.799	13.9968	179.146	-11.7371	0.113739	0.104843	7.82185
ICGV 01510	Spanish	1	5	Nakabango	2020A	R2	13	8.5	0.5	0.327007	27.896	0.16509	36.3685	2.00359	15.1174	30.2891	-0.142215	9.82132	15.6606	153.807	-3.57962	0.152678	0.142073	6.94573
Serenut 9T	Virginia	1	5	Nakabango	2020A	R2	8	8.5	0.39	0.338868	16.5787	0.157389	36.9186	6.02285	14.1835	85.425	-1.09662	15.006	14.1263	211.979	-233.806	0.0946158	0.0858986	9.21323
ICGV-SM 96714	Valencia	1	5	Nakabango	2020A	R2	10	10.2	0.54	0.305808	34.7635	0.183693	34.5271	0.187495	15.8744	2.97637	0.0973824	7.52947	16.3495	123.103	-2.32983	0.173736	0.161457	7.06725
SGV 0065	Virginia	1	5	Nakabango	2020A	R2	7	9	0.455	0.332004	25.2397	0.157764	36.7136	2.67765	14.6615	39.2583	-0.258421	10.5761	15.1663	160.401	-4.42602	0.141408	0.1298	8.20891
SGV 0047	Virginia	1	5	Nakabango	2020A	R2	9	6.2	0.505	0.352436	18.1221	0.154312	38.4661	5.41129	14.5759	78.8743	-0.867974	14.5137	14.8456	215.465	-21.2912	0.108507	0.0992008	8.57645
ICGV-SM 03702	Virginia	2	1	Nakabango	2020A	R2	2	6.9	0.565	0.348169	9.08225	0.146793	37.3572	8.92824	13.1845	117.714	-3.01669	18.6944	12.6828	237.098	6.06138	0.0572874	0.0493575	13.8423
Serenut 4T	Spanish	2	1	Nakabango	2020A	R2	10	9.3	0.555	0.335063	27.1234	0.192474	37.3906	3.26673	16.995	55.518	-0.307808	12.4584	17.3377	216.001	-4.89793	0.145848	0.135886	6.83061
ICGV-SM 99568	Spanish	2	1	Nakabango	2020A	R2	10	11	0.515	0.357232	21.2029	0.126718	39.0487	2.90046	13.2933	38.5567	-0.333623	10.4841	14.1383	148.227	-5.07556	0.139814	0.130236	6.85066
ICGV SM 03590	Spanish	2	1	Nakabango	2020A	R2	3	9.5	0.625	0.356321	11.3278	0.142577	38.375	7.66337	13.3974	102.67	-1.979	17.1351	13.2638	227.277	10.2391	0.0590247	0.0539221	8.64487
12CS-015	Spanish	2	1	Nakabango	2020A	R2	9	11	0.67	0.338225	28.9973	0.181375	37.7832	2.20307	16.6037	36.5792	-0.156236	10.8632	17.2492	187.381	-3.67075	0.142607	0.13063	8.39851
ICGV-SM 16502	Spanish	2	1	Nakabango	2020A	R2	11	7.9	0.625	0.340381	26.3564	0.177799	37.8216	3.10071	16.2371	50.3465	-0.297207	11.9525	16.7485	200.187	-4.77934	0.129832	0.118295	8.88599
SGV 0805	Valencia	2	1	Nakabango	2020A	R2	6	14	0.615	0.353367	20.7163	0.173374	38.8277	5.32073	15.9696	84.9701	-0.741827	15.0602	16.2474	244.689	-13.8564	0.0958978	0.0882973	7.92562
Serenut 9T	Virginia	2	1	Nakabango	2020A	R2	9	7.1	0.385	0.361177	20.6549	0.164383	39.6191	5.00545	15.6813	78.4921	-0.686106	14.5754	16.1585	235.518	-11.5109	0.0881574	0.0776635	11.9036
ICGV-SM 08556	Spanish	2	1	Nakabango	2020A	R2	11	15.3	0.68	0.355051	27.3508	0.166077	39.4079	2.40564	16.1349	38.8148	-0.190864	11.1009	17.0494	189.264	-3.90735	0.151471	0.139856	7.66776
Serenut 11T	Virginia	2	1	Nakabango	2020A	R2	4	15	0.585	0.351864	14.4249	0.150484	38.1377	6.76098	14.0095	94.7182	-1.39685	16.1155	13.9975	225.577	26.0408	0.0628924	0.0534146	15.0698
ICGV 01502	Spanish	2	2	Nakabango	2020A	R2	10	10	0.47	0.343937	19.2323	0.155547	37.6236	4.91678	14.4379	70.9878	-0.744556	13.6621	14.6809	200.572	-13.5442	0.110259	0.100785	8.59239
SGV 990400	Virginia	2	2	Nakabango	2020A	R2	5	13	0.54	0.33248	17.9765	0.147076	36.2757	4.80553	13.5024	64.8862	-0.784898	12.9321	13.6086	175.988	-15.2341	0.0983359	0.0842618	14.3123
SGV 0071	Virginia	2	2	Nakabango	2020A	R2	6	9.1	0.375	0.338788	15.4936	0.155762	36.8277	6.39136	13.9857	89.3876	-1.25463	15.4191	13.8559	213.646	50.205	0.0858121	0.0754263	12.103
ICGV 01510	Spanish	2	2	Nakabango	2020A	R2	15	10	0.575	0.337186	37.1131	0.187043	38.2026	-0.396699	17.5239	-6.95172	0.147638	7.71767	18.6559	143.98	-2.1254	0.185111	0.171394	7.41003
ICGV-SM 95355	Virginia	2	2	Nakabango	2020A	R2	5	13.5	0.655	0.314179	23.8569	0.181797	34.8054	3.90715	15.2958	59.7629	-0.469326	12.3162	15.2051	187.269	-6.81976	0.12079	0.109626	9.24263
DOK 1R	Spanish	2	2	Nakabango	2020A	R2	8	13	0.49	0.322835	24.8647	0.175301	35.789	3.39305	15.3329	52.0252	-0.369872	11.7454	15.5064	182.129	-5.51403	0.131661	0.118417	10.0589
ICGVS-SM 0205	Spanish	2	2	Nakabango	2020A	R2	6	12.5	0.645	0.331022	21.2712	0.166187	36.409	4.44685	14.8004	65.815	-0.607187	13.0325	14.9219	194.47	-9.32891	0.110245	0.098949	10.2466
Serenut 8R	Virginia	2	2	Nakabango	2020A	R2	4	5.5	0.455	0.309893	15.703	0.159821	33.7245	6.05541	13.2923	80.4905	-1.2275	14.2309	12.7997	182.15	60.3686	0.0792431	0.071373	9.93163
SGV 10010 ER	Spanish	2	2	Nakabango	2020A	R2	9	6.5	0.46	0.345287	19.9041	0.162251	37.849	4.99011	14.9471	74.5877	-0.72832	14.0201	15.1867	212.92	-13.0191	0.103343	0.0926953	10.3034
SGV 0060	Virginia	2	2	Nakabango	2020A	R2	7	9.4	0.565	0.32959	18.2592	0.156138	36.0129	5.14316	13.9468	71.7306	-0.84523	13.5667	13.9293	188.975	-19.446	0.104358	0.0946514	9.30131
DOK 1T	Spanish	2	3	Nakabango	2020A	R2	4	5.5	0.455	0.358994	9.74847	0.14508	38.5516	8.66888	13.4883	116.929	-2.63561	18.6373	13.1846	245.726	6.92217	0.0578826	0.0512589	11.4434
ICGV-SM 88710	Virginia	2	3	Nakabango	2020A	R2	8	4	0.62	0.345065	15.0623	0.168183	37.5073	7.49876	14.8575	111.413	-1.55496	17.472	14.5748	254.651	16.3638	0.0816189	0.0708134	13.239
SGV 0065	Virginia	2	3	Nakabango	2020A	R2	8	9.2	0.62	0.3296	20.3204	0.169712	36.2059	4.98636	14.8658	74.1262	-0.732823	13.7827	14.8498	204.67	-13.3679	0.115695	0.107815	6.81126
RedBeauty	Valencia	2	3	Nakabango	2020A	R2	13	9	0.545	0.316793	31.7891	0.192973	35.6643	1.40141	16.6523	23.3368	-0.0494017	9.5747	17.0469	163.219	-3.0242	0.164764	0.153437	6.87467
ICGV 9555	Spanish	2	3	Nakabango	2020A	R2	12	12	0.57	0.336097	25.4504	0.188432	37.3628	3.80625	16.6448	63.3542	-0.40557	13.0564	16.9113	220.801	-5.96662	0.122907	0.110932	9.74265
ICGV-SM 95526	Valencia	2	3	Nakabango	2020A	R2	12	9.4	0.595	0.33961	29.9634	0.196186	38.1106	2.26861	17.6486	40.0378	-0.154897	11.4259	18.2556	208.587	-3.66318	0.156178	0.144336	7.58243
ICGV 01504	Spanish	2	3	Nakabango	2020A	R2	12	12	0.535	0.338896	24.2299	0.182687	37.5517	4.10308	16.317	66.95	-0.469667	13.351	16.5876	221.461	-6.8306	0.13075	0.119469	8.62807
SGV 0080	Virginia	2	3	Nakabango	2020A	R2	11	10.5	0.645	0.319686	28.7054	0.187783	35.7593	2.37601	16.2313	38.5657	-0.185255	10.7336	16.507	177.181	-3.87408	0.163028	0.15286	6.23718
ICGV-SM 01709	Virginia	2	3	Nakabango	2020A	R2	6	6.9	0.58	0.339655	14.756	0.15495	36.8675	6.68297	13.904	92.92	-1.38255	15.7949	13.7293	216.854	26.7687	0.0791159	0.0714569	9.68074
SGV 0075	Virginia	2	3	Nakabango	2020A	R2	9	8.5	0.505	0.349522	13.4863	0.148169	37.8161	6.97229	13.7016	95.5315	-1.54536	16.2292	13.6151	220.961	17.8698	0.080403	0.0725596	9.75513
Serenut 5R	Virginia	2	4	Nakabango	2020A	R2	5	6.1	0.38	0.375162	10.5611	0.13489	40.2936	7.78192	13.4136	104.384	-2.04531	17.5507	13.5013	236.958	9.85499	0.0650252	0.0592778	8.83877
SGV 0084	Virginia	2	4	Nakabango	2020A	R2	7	7	0.38	0.329404	17.2327	0.174537	35.9953	6.58894	14.8648	97.9431	-1.20505	15.9837	14.515	232.004	62.9472	0.086387	0.0753424	12.7851
ICGV-SM 96714	Valencia	2	4	Nakabango	2020A	R2	8	10	0.57	0.346036	18.244	0.17276	37.8599	6.29239	15.4518	97.2289	-1.04186	16.0812	15.4191	247.958	-90.2551	0.109676	0.100882	8.01772
ICGV 01515	Spanish	2	4	Nakabango	2020A	R2	10	6	0.52	0.303445	23.9916	0.187495	33.6602	3.92394	15.2071	59.6719	-0.476089	12.1597	14.9146	181.357	-6.9441	0.127129	0.117335	7.70431
Acholi White	Valencia	2	4	Nakabango	2020A	R2	6	7.9	0.52	0.344016	16.3403	0.174168	37.5073	7.25184	15.2947	110.915	-1.38272	17.3221	15.0327	260.399	24.3176	0.0900931	0.0838866	6.88906
ICGV 01514	Spanish	2	4	Nakabango	2020A	R2	12	7.4	0.535	0.328384	20.0076	0.17722	36.0891	5.46568	15.2308	83.2466	-0.829657	14.5935	15.0791	220.057	-19.3014	0.113248	0.105168	7.13476
Serenut 14R	Virginia	2	4	Nakabango	2020A	R2	7	8	0.53	0.341309	13.9853	0.172147	37.043	8.19247	14.8808	121.91	-1.87102	18.4026	14.3926	264.862	10.5633	0.0610876	0.055676	8.85886
ICGV-SM 95714	Valencia	2	4	Nakabango	2020A	R2	8	17	0.515	0.311552	26.0478	0.210683	34.8362	4.05583	16.9893	68.9056	-0.438633	13.2308	16.6914	220.84	-6.48386	0.110437	0.101598	8.00387
ICGV-SM 01731	Virginia	2	4	Nakabango	2020A	R2	3	6	0.59	0.349378	9.28706	0.143673	37.4962	8.59583	13.0721	112.365	-2.7741	18.1869	12.655	230.156	6.58492	0.0456335	0.0396915	13.0212
B7-30-9-3	Spanish	2	4	Nakabango	2020A	R2	8	11.5	0.495	0.330695	23.9675	0.190513	36.6851	4.42543	16.4342	72.7285	-0.526632	13.746	16.4802	226.537	-7.82656	0.125424	0.114809	8.46313
JL 24	Spanish	2	5	Nakabango	2020A	R2	4	3.5	0.34	0.353795	6.13314	0.146401	37.7283	10.5595	13.0587	137.894	-5.46378	21.026	12.2976	258.57	4.1825	0.0440183	0.0403961	8.22884
SGV 0047	Virginia	2	5	Nakabango	2020A	R2	10	9	0.485	0.347564	18.2946	0.165053	37.9964	5.8605	15.0541	88.2244	-0.953641	15.3084	15.1471	231.877	-35.1218	0.127096	0.119188	6.22229
Serenut 6T	Spanish	2	5	Nakabango	2020A	R2	6	6.7	0.465	0.34788	15.8838	0.172506	37.8873	7.42036	15.2958	113.5	-1.44676	17.615	15.0616	265.311	20.3922	0.0851126	0.0768393	9.72042
SGV 0023	Virginia	2	5	Nakabango	2020A	R2	9	6	0.46	0.336352	18.3343	0.173817	36.8277	6.1591	15.1957	93.5921	-1.02805	15.6429	15.0384	235.244	-75.0502	0.118364	0.110493	6.64912
ICGV-SM 16501	Spanish	2	5	Nakabango	2020A	R2	8	10.1	0.52	0.362223	20.1138	0.146907	39.6088	4.3258	14.5903	63.1148	-0.59049	13.1174	15.2293	199.769	-8.78768	0.117012	0.106031	9.38458
ICGV-SM 16520	Spanish	2	5	Nakabango	2020A	R2	12	9.3	0.615	0.325915	24.9508	0.196586	36.2641	4.18139	16.6917	69.7944	-0.470958	13.4642	16.6814	224.602	-6.91123	0.126675	0.114477	9.62952
SGV 10005	Spanish	2	5	Nakabango	2020A	R2	9	10.2	0.485	0.344114	18.5626	0.175662	37.6897	6.28577	15.5817	97.9428	-1.02677	16.1082	15.5146	249.913	-75.3569	0.104049	0.0948371	8.85344
Serenut 7T	Virginia	2	5	Nakabango	2020A	R2	4	9	0.645	0.340391	15.4491	0.185783	37.0994	8.31167	15.7632	131.019	-1.73025	18.9862	15.1984	288.56	11.9038	0.0702576	0.0615391	12.4093
ICGV 02501	Spanish	2	5	Nakabango	2020A	R2	9	11.3	0.675	0.314134	20.8779	0.177555	34.5892	4.9159	14.8142	72.8249	-0.718628	13.4593	14.5446	195.76	-12.9492	0.112084	0.103236	7.8942
SGV 07010	Virginia	2	5	Nakabango	2020A	R2	7	10.3	0.665	0.327855	18.477	0.171954	35.9071	5.84097	14.7855	86.3614	-0.973598	14.894	14.5673	216.966	-42.2735	0.10197	0.0932168	8.58372
SGV 10010 ER	Spanish	1	1	NaSARRI	2020A	R4	8	7	0.46	0.466521	39.3073	0.228881	52.9151	-0.577551	26.3267	-15.205	0.113069	12.3126	29.7736	366.591	-2.22557	0.14041	0.115704	17.5953	31.5	4
Serenut 14R	Virginia	1	1	NaSARRI	2020A	R4	3	6	0.47	0.472401	34.7468	0.233476	53.1882	1.87541	26.4752	49.6519	-0.0683919	16.1055	29.46	474.468	-3.10462	0.0663098	0.0538064	18.8561	33.1	3
DOK 1T	Spanish	1	1	NaSARRI	2020A	R4	4	10	0.2	0.446391	38.2763	0.265811	51.166	0.605574	28.2823	17.127	0.0275085	14.7154	30.9338	455.202	-2.59311	0.114301	0.0855959	25.1138	32.2	3
ICGV SM 03590	Spanish	1	1	NaSARRI	2020A	R4	6	7.5	0.55	0.489314	45.7058	0.254697	56.3153	-3.42719	30.3152	-103.896	0.254858	9.9261	34.7818	345.248	-1.69045	0.207138	0.164828	20.4261	33.2	3
ICGV 02501	Spanish	1	1	NaSARRI	2020A	R4	15	15.5	0.6	0.485959	53.471	0.281636	57.1497	-7.10414	33.3715	-237.076	0.39079	5.63809	38.4848	216.981	-1.27406	0.312508	0.244666	21.709	32.8	4
SGV 0080	Virginia	1	1	NaSARRI	2020A	R4	12	13.5	0.81	0.472754	59.5318	0.277658	56.1448	-9.44933	32.9147	-311.022	0.481935	1.93504	38.3103	74.1321	-1.05004	0.375033	0.321111	14.378	30.4	3
JL 24	Spanish	1	1	NaSARRI	2020A	R4	6	15.5	0.72	0.470408	49.4458	0.273481	54.938	-5.06111	31.3918	-158.878	0.323665	7.77635	35.766	278.129	-1.4675	0.247956	0.198124	20.097	31.6	4
Acholi White	Valencia	1	1	NaSARRI	2020A	R4	8	17.5	0.53	0.466411	50.4242	0.285194	54.7958	-5.50624	32.2932	-177.814	0.335378	7.43511	36.6135	272.226	-1.42647	0.261626	0.19666	24.8314	32.3	4
ICGV-SM 16502	Spanish	1	1	NaSARRI	2020A	R4	16	18.5	0.71	0.457657	68.683	0.336842	56.6417	-14.6572	38.2575	-560.747	0.580813	-3.82633	44.0122	-168.405	-0.802355	0.489215	0.389977	20.2851	32	4
SGV 0060	Virginia	1	1	NaSARRI	2020A	R4	13	9	0.75	0.46983	57.0204	0.273724	55.5357	-8.35594	32.1572	-268.703	0.450747	3.22761	37.2665	120.282	-1.12715	0.327243	0.277991	15.0506	31.6	3
SGV 0075	Virginia	1	2	NaSARRI	2020A	R4	14	10	0.65	0.439111	50.5172	0.291131	51.8903	-5.32312	31.265	-166.427	0.336442	7.085	34.9356	247.518	-1.42183	0.282419	0.232127	17.8077	33	3
ICGV 01502	Spanish	1	2	NaSARRI	2020A	R4	14	11.5	0.61	0.463119	50.6149	0.285692	54.4584	-5.56059	32.1682	-178.874	0.338796	7.28011	36.4299	265.214	-1.41659	0.273767	0.225361	17.6815	31.4	4
SGV 07010	Virginia	1	2	NaSARRI	2020A	R4	9	12	0.45	0.461728	47.5787	0.247327	53.3801	-4.15224	28.4994	-118.336	0.30621	7.89867	32.6145	257.611	-1.53653	0.231542	0.1943	16.0843	31.9	2
Serenut 5R	Virginia	1	2	NaSARRI	2020A	R4	4	5.5	0.45	0.436326	35.286	0.23904	49.4619	1.60396	25.3441	40.6508	-0.0488241	14.8445	27.7013	411.213	-2.99823	0.0866617	0.0721297	16.7687	33.6	2
12CS-015	Spanish	1	2	NaSARRI	2020A	R4	9	9.5	0.62	0.45458	49.0763	0.270966	53.1285	-4.75887	30.3058	-144.221	0.319363	7.67004	34.3013	263.092	-1.48279	0.231932	0.186277	19.6847	32.8	3
DOK 1R	Spanish	1	2	NaSARRI	2020A	R4	12	12.5	0.61	0.45777	50.7395	0.254965	53.3438	-5.47997	29.2776	-160.441	0.362439	6.23591	33.5825	209.417	-1.36942	0.263928	0.203176	23.0184	33.7	2
B7-30-9-3	Spanish	1	2	NaSARRI	2020A	R4	13	10.5	0.69	0.446318	64.8215	0.31576	54.452	-11.9652	35.2416	-421.671	0.537899	-1.0378	40.3422	-41.8672	-0.903832	0.401118	0.335766	16.2925	30.1	3
ICGV-SM 08556	Spanish	1	2	NaSARRI	2020A	R4	13	14.5	0.61	0.470166	50.8098	0.255137	54.7038	-5.62042	29.9368	-168.257	0.362195	6.37849	34.5224	220.201	-1.3691	0.250497	0.210099	16.1274	32.2	4
Serenut 7T	Virginia	1	2	NaSARRI	2020A	R4	4	11	0.52	0.457619	40.2729	0.237839	52.175	-0.886187	26.7661	-23.7198	0.131661	11.9659	30.0926	360.085	-2.14665	0.137652	0.120837	12.2155	32.9	2
ICGV-SM 01709	Virginia	1	2	NaSARRI	2020A	R4	17	15	0.75	0.43187	65.2827	0.261818	51.7211	-10.6351	29.849	-317.449	0.560943	-1.10631	34.7291	-38.4214	-0.885637	0.40283	0.3538	12.1715	31.5	2
ICGV-SM 95526	Valencia	1	3	NaSARRI	2020A	R4	18	17.5	0.66	0.447506	56.9645	0.326141	54.0595	-8.65372	35.3269	-305.709	0.42924	3.78053	39.6222	149.793	-1.15094	0.359213	0.294837	17.9212	32.3	4
ICGV-SM 95355	Virginia	1	3	NaSARRI	2020A	R4	13	12	0.69	0.463287	54.1365	0.281928	54.726	-7.14404	32.2335	-230.278	0.403394	4.98104	36.8809	183.705	-1.24201	0.333553	0.29135	12.6527	32.7	2
Serenut 6T	Spanish	1	3	NaSARRI	2020A	R4	14	10	0.59	0.449913	41.9151	0.295035	52.3148	-0.912058	31.2297	-28.4833	0.115387	13.6897	34.102	466.846	-2.18528	0.18616	0.136627	26.6077	32.9	4
ICGV-SM 16520	Spanish	1	3	NaSARRI	2020A	R4	13	10	0.66	0.439258	46.2717	0.298807	51.6344	-3.22232	31.4251	-101.262	0.236893	10.227	34.5718	353.565	-1.72812	0.225906	0.185566	17.857	32.4	2
ICGV 01504	Spanish	1	3	NaSARRI	2020A	R4	12	12.5	0.66	0.45106	52.8706	0.286615	53.3471	-6.48714	31.8095	-206.353	0.381057	5.68911	36.0229	204.938	-1.2993	0.28759	0.24823	13.6864	31.7	4
SGV 0805	Valencia	1	3	NaSARRI	2020A	R4	8	9.5	0.68	0.475786	42.7611	0.260044	54.6752	-1.8611	29.7818	-55.427	0.175297	11.9353	33.5995	401.019	-1.96498	0.157895	0.133793	15.2642	32.3	2
ICGV-SM 01731	Virginia	1	3	NaSARRI	2020A	R4	13	11.5	0.61	0.464052	49.5	0.255681	53.9396	-5.00778	29.5327	-147.894	0.338081	7.07388	33.8549	239.486	-1.43727	0.25869	0.221774	14.2705	30.6	3
ICGV-SM 95714	Valencia	1	3	NaSARRI	2020A	R4	10	11	0.56	0.455037	45.4945	0.257787	52.6466	-3.1413	28.8511	-90.6299	0.251045	9.47438	32.5594	308.48	-1.7037	0.201289	0.169167	15.9579	32.6	2
Serenut 11T	Virginia	1	3	NaSARRI	2020A	R4	11	11.5	0.71	0.465345	49.0904	0.235496	53.6986	-4.81037	27.8204	-133.826	0.345539	6.68487	32.1938	215.211	-1.4289	0.247431	0.216178	12.6309	31.5	3
Serenut 8R	Virginia	1	3	NaSARRI	2020A	R4	5	8.5	0.6	0.445963	37.5368	0.226284	50.5336	0.216288	25.0154	5.41054	0.060755	12.7424	27.9026	355.547	-2.45325	0.112868	0.0939557	16.7561	32.2	2
ICGV-SM 99568	Spanish	1	4	NaSARRI	2020A	R4	14	14.5	0.75	0.454804	45.8194	0.29223	53.1982	-3.10523	31.7222	-98.5047	0.229167	10.6655	35.211	375.544	-1.75673	0.229158	0.196248	14.3613	33.2	4
ICGV-SM 88710	Virginia	1	4	NaSARRI	2020A	R4	18	9.5	0.67	0.467161	44.4292	0.287253	54.3334	-2.45485	31.8305	-78.1392	0.195824	11.7963	35.4583	418.277	-1.87554	0.223667	0.193027	13.6989	32.1	3
SGV 0071	Virginia	1	4	NaSARRI	2020A	R4	12	11	0.7	0.467371	39.4277	0.286532	53.8323	0.406456	31.191	12.6778	0.037348	15.8473	34.1732	541.554	-2.53653	0.157883	0.12903	18.2748	32	2
SGV 0084	Virginia	1	4	NaSARRI	2020A	R4	16	10.5	0.59	0.480029	44.8622	0.273086	55.5419	-2.83407	31.3529	-88.8565	0.217926	11.157	35.4143	395.118	-1.80428	0.229357	0.191045	16.7039	33.4	3
ICGV 01514	Spanish	1	4	NaSARRI	2020A	R4	10	10.5	0.49	0.469263	37.7618	0.274905	53.6986	1.17881	30.1196	35.5052	-0.0119442	16.593	33.036	548.166	-2.78787	0.12895	0.100978	21.6927	33.3	3
RedBeauty	Valencia	1	4	NaSARRI	2020A	R4	14	15.5	0.67	0.486678	45.9588	0.281237	56.503	-3.38255	32.5318	-110.041	0.237445	10.866	36.807	399.947	-1.73242	0.226033	0.17116	24.2767	33.7	4
ICGV-SM 03702	Virginia	1	4	NaSARRI	2020A	R4	11	11	0.63	0.489775	46.5338	0.248202	56.3304	-3.8543	29.8504	-115.052	0.279749	9.10177	34.4474	313.532	-1.61504	0.231221	0.199146	13.8723	32.6	2
SGV 0023	Virginia	1	4	NaSARRI	2020A	R4	12	12	0.62	0.4601	55.8822	0.251508	53.9428	-7.50208	29.5874	-221.967	0.446426	3.43099	34.4111	118.064	-1.15203	0.324623	0.285703	11.9892	31.5	2
SGV 990400	Virginia	1	4	NaSARRI	2020A	R4	7	12.5	0.72	0.448861	42.5577	0.241777	51.4813	-1.87574	26.9132	-50.4821	0.193075	10.4915	30.2815	317.698	-1.91308	0.181472	0.154528	14.8474	32	2
ICGV-SM 16501	Spanish	1	4	NaSARRI	2020A	R4	14	15	0.72	0.454605	57.1532	0.276275	53.9136	-8.24679	31.567	-260.326	0.453121	3.06597	36.316	111.344	-1.12064	0.313133	0.265454	15.2263	32.8	4
ICGVS-SM 0205	Spanish	1	5	NaSARRI	2020A	R4	8	9	0.52	0.466851	41.6925	0.289631	54.0595	-0.881027	31.685	-27.9154	0.112079	14.0986	34.9318	492.489	-2.19988	0.16271	0.122702	24.5887	32.7	3
ICGV 9555	Spanish	1	5	NaSARRI	2020A	R4	15	10.5	0.49	0.476908	43.1949	0.282526	55.1896	-1.83406	31.796	-58.3158	0.163676	12.8089	35.5105	454.851	-1.99646	0.201585	0.155378	22.9219	32.6	2
SGV 10005	Spanish	1	5	NaSARRI	2020A	R4	11	11.5	0.52	0.449593	40.8458	0.282528	51.9935	-0.504204	30.0716	-15.1622	0.0952756	13.8298	32.9363	455.501	-2.27618	0.168887	0.134909	20.119	34.3	3
ICGV 01515	Spanish	1	5	NaSARRI	2020A	R4	9	11.5	0.41	0.452562	38.0224	0.276936	51.9557	1.01907	29.4529	30.0145	-0.00129547	15.8906	32.0672	509.568	-2.73383	0.124935	0.103633	17.0505	34.9	3
Serenut 4T	Spanish	1	5	NaSARRI	2020A	R4	7	9.5	0.64	0.490083	40.9416	0.250603	55.8846	-1.03655	29.454	-30.5306	0.129344	13.1651	33.3977	439.684	-2.14589	0.154084	0.126423	17.952	32.4	3
ICGV 01510	Spanish	1	5	NaSARRI	2020A	R4	16	11.5	0.6	0.475554	48.8877	0.25878	55.1865	-4.81572	30.319	-146.008	0.321891	7.75573	34.8149	270.015	-1.48153	0.254248	0.21351	16.023	32.1	2
Serenut 9T	Virginia	1	5	NaSARRI	2020A	R4	7	12.5	0.69	0.452954	48.2696	0.257455	52.6567	-4.39163	29.0008	-127.361	0.313536	7.68174	32.9518	253.127	-1.5087	0.241766	0.205117	15.159	32.1	3
ICGV-SM 96714	Valencia	1	5	NaSARRI	2020A	R4	10	11	0.61	0.453838	47.2901	0.26718	52.8248	-3.92389	29.7616	-116.781	0.283916	8.67659	33.5749	291.315	-1.59283	0.230616	0.183326	20.5057	33.7	4
SGV 0065	Virginia	1	5	NaSARRI	2020A	R4	14	12	0.79	0.4619	67.6725	0.246657	54.9507	-11.7285	30.3625	-356.106	0.590773	-2.34183	36.1949	-84.7623	-0.830951	0.405644	0.370566	8.64731	31	2
SGV 0047	Virginia	1	5	NaSARRI	2020A	R4	12	7.5	0.77	0.450985	59.6831	0.243839	53.0719	-8.62516	28.7989	-248.395	0.500996	1.45921	33.7182	49.2019	-1.02761	0.326071	0.2921	10.4182	31.6	2
ICGV-SM 03702	Virginia	2	1	NaSARRI	2020A	R4	16	11.5	0.71	0.433649	52.0444	0.225141	50.2924	-5.60675	25.7159	-144.183	0.4088	4.4819	29.6717	132.986	-1.2659	0.293946	0.260181	11.4867	32.5	3
Serenut 4T	Spanish	2	1	NaSARRI	2020A	R4	13	12	0.61	0.442555	49.0483	0.261747	51.6518	-4.64966	28.8972	-134.362	0.327073	7.18331	32.6742	234.709	-1.46682	0.236987	0.198603	16.1967	31.9	3
ICGV-SM 99568	Spanish	2	1	NaSARRI	2020A	R4	10	11.5	0.69	0.467484	46.2718	0.247465	53.8974	-3.60104	28.6717	-103.248	0.276565	8.82418	32.7747	289.21	-1.62717	0.220207	0.190879	13.3186	32.8	4
ICGV SM 03590	Spanish	2	1	NaSARRI	2020A	R4	6	8.5	0.51	0.457675	39.1341	0.187179	51.3941	-1.16494	22.4652	-26.1707	0.175797	9.68766	25.8998	250.909	-2.00948	0.217151	0.192077	11.5469	33.4	2
12CS-015	Spanish	2	1	NaSARRI	2020A	R4	9	9.5	0.55	0.47096	36.1915	0.20188	52.761	0.361444	23.941	8.65334	0.0519582	12.6955	27.2748	346.266	-2.50141	0.156393	0.114585	26.7326	33.7	3
ICGV-SM 16502	Spanish	2	1	NaSARRI	2020A	R4	13	13	0.65	0.481598	50.1404	0.264785	56.0593	-5.44626	31.2839	-170.38	0.341703	7.251	36.0191	261.174	-1.41998	0.252394	0.213703	15.3295	33	4
SGV 0805	Valencia	2	1	NaSARRI	2020A	R4	4	15	0.52	0.444032	41.8154	0.257596	51.1238	-1.35829	27.8813	-37.8709	0.155974	11.6112	30.9724	359.626	-2.0423	0.161751	0.137842	14.7815	33.3	2
Serenut 9T	Virginia	2	1	NaSARRI	2020A	R4	9	11	0.61	0.461297	53.9723	0.25348	53.9656	-6.82223	29.6463	-202.254	0.417536	4.4481	34.3324	152.714	-1.22329	0.29892	0.262145	12.3027	32.6	3
ICGV-SM 08556	Spanish	2	1	NaSARRI	2020A	R4	14	24.5	0.83	0.440614	71.1718	0.30759	54.282	-14.6037	34.9485	-510.38	0.617331	-4.91587	40.5776	-199.474	-0.745518	0.472266	0.422188	10.6039	30.5	4
Serenut 11T	Virginia	2	1	NaSARRI	2020A	R4	8	9.5	0.72	0.464209	55.0721	0.247323	54.2498	-7.20114	29.3566	-211.401	0.436721	3.80309	34.2118	130.111	-1.17849	0.297805	0.265387	10.8856	31.4	3
ICGV 01502	Spanish	2	2	NaSARRI	2020A	R4	17	19	0.76	0.426721	67.4943	0.274204	51.5823	-11.6861	30.8225	-360.195	0.583154	-2.2656	35.7492	-80.9933	-0.832597	0.433751	0.365298	15.7816	31.7	4
SGV 990400	Virginia	2	2	NaSARRI	2020A	R4	5	10.5	0.7	0.445111	44.5786	0.222197	50.9507	-2.89957	25.3317	-73.451	0.266809	8.30556	28.913	240.138	-1.67621	0.189005	0.161029	14.802	31.7	2
SGV 0071	Virginia	2	2	NaSARRI	2020A	R4	9	11.5	0.85	0.47198	57.7925	0.240188	55.1645	-8.20433	29.3566	-240.851	0.477391	2.39209	34.6212	82.8172	-1.08379	0.318497	0.283473	10.9966	32.3	2
ICGV 01510	Spanish	2	2	NaSARRI	2020A	R4	18	12	0.7	0.456935	59.2625	0.260834	54.0336	-8.85281	30.557	-270.515	0.487645	1.82798	35.5758	65.0317	-1.04766	0.344003	0.295999	13.9546	33.7	3
ICGV-SM 95355	Virginia	2	2	NaSARRI	2020A	R4	12	11.5	0.84	0.467389	58.1752	0.249506	54.878	-8.41757	30.0069	-252.585	0.477752	2.30843	35.1939	81.2424	-1.07723	0.331852	0.300608	9.41504	33.7	2
DOK 1R	Spanish	2	2	NaSARRI	2020A	R4	8	18	0.52	0.465115	48.9598	0.247527	53.8714	-4.77156	28.8396	-137.61	0.333508	7.15172	33.1616	237.163	-1.45552	0.259545	0.207995	19.8617	32.7	3
ICGVS-SM 0205	Spanish	2	2	NaSARRI	2020A	R4	4	11.5	0.47	0.476028	39.9838	0.259577	54.4264	-0.386862	29.4296	-11.3852	0.0900078	14.0048	32.9163	460.987	-2.30627	0.131537	0.102028	22.4341	35	3
Serenut 8R	Virginia	2	2	NaSARRI	2020A	R4	3	10.5	0.61	0.484419	38.6599	0.24445	54.9759	0.0543345	28.3821	1.54213	0.0644894	14.3032	31.9848	457.485	-2.42421	0.125775	0.103049	18.0682	30.4	2
SGV 10010 ER	Spanish	2	2	NaSARRI	2020A	R4	10	20	0.66	0.487082	47.5656	0.235064	55.903	-4.30901	28.6544	-123.472	0.312631	7.9145	33.3387	263.859	-1.52335	0.243754	0.200983	17.5466	32.2	3
SGV 0060	Virginia	2	2	NaSARRI	2020A	R4	7	13	0.56	0.487553	46.6069	0.256726	56.2423	-3.837	30.492	-116.998	0.273826	9.37231	35.0118	328.141	-1.62857	0.212246	0.173669	18.1752	31.9	2
DOK 1T	Spanish	2	3	NaSARRI	2020A	R4	3	12	0.46	0.483482	30.4794	0.15728	53.1085	1.53969	20.1223	30.982	-0.0551192	12.7686	23.2693	297.117	-3.0466	0.0697259	0.0490319	29.6791	33.9	2
ICGV-SM 88710	Virginia	2	3	NaSARRI	2020A	R4	15	13.5	0.81	0.462975	73.7512	0.268406	56.1662	-15.0543	33.1074	-498.408	0.653122	-6.08559	39.6095	-241.047	-0.696517	0.47843	0.429466	10.2341	31.8	4
SGV 0065	Virginia	2	3	NaSARRI	2020A	R4	8	11.5	0.76	0.443608	55.6805	0.255831	52.1921	-7.28796	29.0951	-212.044	0.443408	3.44945	33.5115	115.596	-1.15771	0.303	0.256114	15.474	32	2
RedBeauty	Valencia	2	3	NaSARRI	2020A	R4	13	14	0.82	0.477181	60.6821	0.284329	56.8727	-10.1173	33.8884	-342.858	0.494038	1.34651	39.4863	53.1686	-1.01771	0.360474	0.281956	21.7819	32.1	4
ICGV 9555	Spanish	2	3	NaSARRI	2020A	R4	14	12	0.78	0.475306	66.0729	0.301235	57.5422	-12.8108	35.8818	-459.676	0.55585	-1.865	41.9326	-78.2045	-0.872091	0.430836	0.360474	16.3315	31.5	5
ICGV-SM 95526	Valencia	2	3	NaSARRI	2020A	R4	15	14	0.84	0.449482	70.2854	0.346217	56.1112	-15.5741	38.7309	-603.199	0.599372	-5.02994	44.4091	-223.375	-0.760902	0.5351	0.429119	19.8058	32.4	5
ICGV 01504	Spanish	2	3	NaSARRI	2020A	R4	10	18	0.78	0.468134	52.488	0.263221	54.7704	-6.36307	30.7009	-195.352	0.386878	5.57386	35.3779	197.191	-1.29696	0.292189	0.240806	17.5857	31.6	4
SGV 0080	Virginia	2	3	NaSARRI	2020A	R4	15	13.5	0.77	0.445975	66.2796	0.255222	53.2412	-11.0999	30.131	-334.451	0.573036	-1.5987	35.4493	-56.6726	-0.863399	0.415593	0.368427	11.3491	32.7	3
ICGV-SM 01709	Virginia	2	3	NaSARRI	2020A	R4	14	11	0.81	0.454056	66.1077	0.227804	53.5315	-10.4691	28.0987	-294.168	0.579718	-1.42295	33.544	-47.7315	-0.865268	0.389444	0.344971	11.4198	34	3
SGV 0075	Virginia	2	3	NaSARRI	2020A	R4	10	18	0.86	0.438243	72.9545	0.256603	52.9986	-13.6564	30.548	-417.175	0.64845	-5.0813	36.261	-184.253	-0.712755	0.444881	0.399332	10.2386	31.1	2
Serenut 5R	Virginia	2	4	NaSARRI	2020A	R4	7	11.5	0.64	0.449242	51.9311	0.198683	51.5266	-5.52253	24.1808	-133.539	0.424875	4.06515	28.456	115.678	-1.24144	0.262999	0.229609	12.6962	30.4	2
SGV 0084	Virginia	2	4	NaSARRI	2020A	R4	17	16	0.86	0.454157	81.4524	0.243594	55.3584	-17.2987	31.3162	-541.729	0.737628	-9.86391	38.2453	-377.249	-0.557562	0.541372	0.496995	8.19713	33.3	3
ICGV-SM 96714	Valencia	2	4	NaSARRI	2020A	R4	16	11.5	0.83	0.443813	68.5534	0.276614	53.6724	-12.5739	32.1281	-403.975	0.594018	-2.98714	37.6086	-112.342	-0.808291	0.408519	0.353935	13.3616	31.7	4
ICGV 01515	Spanish	2	4	NaSARRI	2020A	R4	13	21	0.77	0.425834	78.0388	0.28754	52.875	-16.8358	33.2067	-559.063	0.698862	-8.64651	39.1472	-338.486	-0.6046	0.530387	0.476523	10.1555	31.2	3
Acholi White	Valencia	2	4	NaSARRI	2020A	R4	12	22	0.74	0.430469	71.6412	0.272166	52.3488	-13.4374	31.3318	-421.019	0.630879	-4.53015	36.7365	-166.422	-0.738321	0.448685	0.38126	15.0273	32.1	4
ICGV 01514	Spanish	2	4	NaSARRI	2020A	R4	11	18	0.75	0.470306	53.3592	0.224376	54.3559	-6.41187	27.4607	-176.075	0.425083	4.23471	32.3205	136.868	-1.22243	0.257711	0.215159	16.5115	32.1	3
Serenut 14R	Virginia	2	4	NaSARRI	2020A	R4	0
ICGV-SM 95714	Valencia	2	4	NaSARRI	2020A	R4	13	25	0.81	0.437434	76.0808	0.288736	54.0207	-16.257	33.76	-548.837	0.67652	-7.63464	39.8289	-304.079	-0.643664	0.514762	0.449795	12.6207	32.9	3
ICGV-SM 01731	Virginia	2	4	NaSARRI	2020A	R4	15	15	0.78	0.40624	82.9261	0.271464	50.7481	-17.8432	31.2994	-558.483	0.751586	-10.658	37.1174	-395.598	-0.521971	0.570441	0.522926	8.32945	31.2	3
B7-30-9-3	Spanish	2	4	NaSARRI	2020A	R4	12	13	0.8	0.423529	64.6842	0.277695	51.0532	-10.6143	30.648	-325.307	0.54963	-0.833481	35.2474	-29.3781	-0.901109	0.3809	0.310066	18.5964	30.8	4
JL 24	Spanish	2	5	NaSARRI	2020A	R4	5	13	0.63	0.46854	45.2899	0.192912	53.0619	-3.42576	23.9355	-81.9973	0.312099	7.10117	28.0878	199.456	-1.55499	0.184601	0.153473	16.8624	31.8	4
SGV 0047	Virginia	2	5	NaSARRI	2020A	R4	16	16	0.78	0.470638	79.4465	0.226672	56.5211	-15.976	30.2697	-483.591	0.718627	-8.35907	37.3093	-311.871	-0.598912	0.500551	0.455498	9.00055	31.4	3
Serenut 6T	Spanish	2	5	NaSARRI	2020A	R4	8	14.5	0.68	0.468318	47.1377	0.213259	53.4953	-4.06535	25.8386	-105.043	0.327812	6.97586	30.1371	210.232	-1.49466	0.200079	0.148336	25.8615	32.1	3
SGV 0023	Virginia	2	5	NaSARRI	2020A	R4	10	11	0.7	0.428646	55.3371	0.236093	50.1585	-6.77394	26.6621	-180.607	0.451501	3.15988	30.7412	97.1384	-1.15114	0.305679	0.254481	16.7489	32.4	2
ICGV-SM 16501	Spanish	2	5	NaSARRI	2020A	R4	16	10	0.59	0.465267	52.3509	0.251494	54.2305	-6.18948	29.5171	-182.695	0.391728	5.34598	34.1485	182.557	-1.29165	0.263345	0.204178	22.4675	33	3
ICGV-SM 16520	Spanish	2	5	NaSARRI	2020A	R4	10	12.5		0.465516	63.3284	0.300666	56.1601	-11.3585	34.9393	-396.859	0.522584	-0.151208	40.4523	-6.11671	-0.944658	0.405813	0.316714	21.9556	31.5	4
SGV 10005	Spanish	2	5	NaSARRI	2020A	R4	14	15.5	0.65	0.485277	53.2646	0.244143	56.3395	-6.7088	29.9476	-200.912	0.409429	4.88518	35.1257	171.595	-1.24873	0.290572	0.225482	22.4007	32.7	3
Serenut 7T	Virginia	2	5	NaSARRI	2020A	R4	8	11.5	0.77	0.499739	51.0128	0.236722	57.5716	-5.87393	29.7465	-174.729	0.375415	6.128	35.0365	214.704	-1.34291	0.262187	0.212346	19.0096	31.4	2
ICGV 02501	Spanish	2	5	NaSARRI	2020A	R4	13	19.5	0.76	0.470037	65.0151	0.295662	56.7169	-12.0689	34.9438	-421.732	0.544393	-1.14942	40.7536	-46.8429	-0.899801	0.429748	0.342229	20.3652	31.7	4
SGV 07010	Virginia	2	5	NaSARRI	2020A	R4	14	11.5	0.83	0.471824	71.4319	0.272918	57.0308	-14.3631	33.7473	-484.714	0.625655	-4.85103	40.2604	-195.305	-0.746222	0.489487	0.42499	13.1765	31.2	2
SGV 10010 ER	Spanish	1	1	NaSARRI	2020A	R4	11	6.5	0.55	0.473889	42.5617	0.216136	53.7867	-2.23697	25.9099	-57.9597	0.222114	9.73139	29.8921	290.891	-1.82525	0.184218	0.152114	17.427	32.8	3
Serenut 14R	Virginia	1	1	NaSARRI	2020A	R4	0
DOK 1T	Spanish	1	1	NaSARRI	2020A	R4	3	7	0.32	0.466105	37.1677	0.187561	52.1443	-0.383704	22.651	-8.69128	0.115142	10.9761	26.055	285.984	-2.2409	0.106275	0.0815985	23.2192	32.2	2
ICGV SM 03590	Spanish	1	1	NaSARRI	2020A	R4	3	7	0.62	0.498778	27.1255	0.123538	54.1144	1.52372	17.4806	26.6355	-0.0617707	11.5544	20.6183	238.233	-3.09748	0.039591	0.0285731	27.8294	32.7	2
ICGV 02501	Spanish	1	1	NaSARRI	2020A	R4	12	14	0.73	0.460776	60.0278	0.216146	53.6135	-8.36595	26.8509	-224.633	0.517216	1.12313	31.9798	35.9177	-1.00773	0.317438	0.26326	17.0672	31.9	2
SGV 0080	Virginia	1	1	NaSARRI	2020A	R4	13	14	0.6	0.460421	59.8479	0.193649	53.1118	-7.88722	24.8012	-195.612	0.527613	0.986591	29.8226	29.4227	-0.999101	0.311511	0.272141	12.6383	31.7	2
JL 24	Spanish	1	1	NaSARRI	2020A	R4	5	13.5	0.63	0.470066	45.7788	0.195648	53.2975	-3.5918	24.2608	-87.1399	0.318294	7.0082	28.4816	199.604	-1.5347	0.170965	0.13351	21.9083	33.8	3
Acholi White	Valencia	1	1	NaSARRI	2020A	R4	7	17	0.75	0.452985	52.9255	0.200791	52.0313	-5.89986	24.6035	-145.157	0.43804	3.71723	29.034	107.926	-1.2065	0.231991	0.194496	16.1623	34	3
ICGV-SM 16502	Spanish	1	1	NaSARRI	2020A	R4	14	14.5	0.69	0.451128	59.24	0.233707	52.8549	-8.29962	27.8889	-231.467	0.500134	1.57745	32.7715	51.6953	-1.03587	0.303055	0.242953	19.832	33.1	4
SGV 0060	Virginia	1	1	NaSARRI	2020A	R4	12	6.5	0.67	0.457555	64.9263	0.20784	53.4031	-9.6123	26.3478	-253.263	0.574257	-0.865276	31.7042	-27.4329	-0.888871	0.342062	0.302058	11.6951	31.6	2
SGV 0075	Virginia	1	2	NaSARRI	2020A	R4	17	13	0.8	0.419439	77.4355	0.234634	50.7481	-14.1404	28.107	-397.442	0.700176	-6.64511	33.6146	-223.372	-0.629415	0.446171	0.406229	8.95219	32.9	3
ICGV 01502	Spanish	1	2	NaSARRI	2020A	R4	20	18	0.78	0.429667	74.678	0.237501	51.728	-13.4244	28.5764	-383.622	0.67089	-5.47196	34.138	-186.802	-0.681263	0.445715	0.396595	11.0207	31.8	3
SGV 07010	Virginia	1	2	NaSARRI	2020A	R4	9	11	0.71	0.461537	48.3819	0.171092	52.1648	-4.41116	22.0126	-97.101	0.394634	4.80388	26.2242	125.978	-1.33932	0.209316	0.184517	11.8479	33.2	2
Serenut 5R	Virginia	1	2	NaSARRI	2020A	R4	3	10	0.59	0.460374	47.5577	0.178976	52.1203	-4.15884	22.6007	-93.9925	0.371681	5.41615	26.7526	144.896	-1.39542	0.204047	0.170443	16.469	34.4	2
12CS-015	Spanish	1	2	NaSARRI	2020A	R4	11	9.5	0.74	0.454458	63.9445	0.23466	53.5676	-9.9121	28.5296	-282.788	0.553329	-0.465827	33.8403	-15.7637	-0.916965	0.354325	0.292722	17.3859	34.1	2
DOK 1R	Spanish	1	2	NaSARRI	2020A	R4	14	17	0.85	0.44215	75.4746	0.209821	52.5251	-12.9005	26.7809	-345.486	0.683381	-5.36647	32.5649	-174.759	-0.672939	0.428769	0.381132	11.1104	32.8	2
B7-30-9-3	Spanish	1	2	NaSARRI	2020A	R4	12	11.5	0.76	0.450267	71.7524	0.240712	53.8649	-12.8822	29.6401	-381.83	0.637936	-4.27977	35.5078	-151.965	-0.741109	0.405575	0.351313	13.379	29.1	3
ICGV-SM 08556	Spanish	1	2	NaSARRI	2020A	R4	16	24	0.79	0.430042	73.8726	0.24675	51.9179	-13.4581	29.3348	-394.79	0.660293	-5.25118	34.8723	-183.121	-0.69598	0.427276	0.385374	9.80676	29.8	3
Serenut 7T	Virginia	1	2	NaSARRI	2020A	R4	5	11	0.64	0.456646	52.5665	0.189744	52.2058	-5.71568	23.7537	-135.768	0.440816	3.64719	28.2077	102.879	-1.20713	0.23937	0.204471	14.5796	31.1	2
ICGV-SM 01709	Virginia	1	2	NaSARRI	2020A	R4	16	15.5	0.72	0.451391	68.831	0.191528	52.6264	-10.2162	24.9059	-254.443	0.621014	-2.30159	30.2826	-69.6981	-0.803384	0.369778	0.337403	8.75515	30.2	2
ICGV-SM 95526	Valencia	1	3	NaSARRI	2020A	R4	19	25	0.81	0.417429	77.274	0.285493	51.7522	-16.11	32.4092	-522.113	0.691046	-7.9208	38.0129	-301.093	-0.619855	0.52163	0.453391	13.0819	29.1	5
ICGV-SM 95355	Virginia	1	3	NaSARRI	2020A	R4	5	13	0.8	0.438196	66.9269	0.210295	51.4604	-9.96233	25.8411	-257.438	0.595723	-1.62071	30.8882	-50.0609	-0.843581	0.349902	0.326133	6.7928	28.8	2
Serenut 6T	Spanish	1	3	NaSARRI	2020A	R4	13	14.5	0.81	0.452972	61.4733	0.208944	52.7039	-8.53747	25.9625	-221.654	0.537323	0.494734	30.9843	15.329	-0.967909	0.300853	0.270541	10.0752	30.7	3
ICGV-SM 16520	Spanish	1	3	NaSARRI	2020A	R4	17	15	0.73	0.439991	67.7147	0.242365	52.41	-11.1664	28.8307	-321.936	0.593524	-2.19073	34.0931	-74.6888	-0.828841	0.363716	0.323498	11.0575	28.8	3
ICGV 01504	Spanish	1	3	NaSARRI	2020A	R4	18	20.5	0.78	0.44412	74.2347	0.224388	53.002	-13.0876	28.0932	-367.673	0.667964	-5.14351	33.9295	-174.517	-0.693384	0.434186	0.390589	10.0412	28.3	4
SGV 0805	Valencia	1	3	NaSARRI	2020A	R4	8	22	0.77	0.448439	61.6897	0.208494	52.2126	-8.51046	25.738	-219.042	0.539625	0.426563	30.6653	13.0807	-0.963287	0.296841	0.264873	10.7693	28.5	3
ICGV-SM 01731	Virginia	1	3	NaSARRI	2020A	R4	17	12.5	0.78	0.46223	65.4909	0.189072	53.5413	-9.36096	24.8791	-232.892	0.588022	-1.07342	30.2676	-32.4897	-0.871778	0.344897	0.315333	8.5718	27.9	2
ICGV-SM 95714	Valencia	1	3	NaSARRI	2020A	R4	13	21	0.81	0.433379	79.6757	0.25277	53.0353	-16.2838	30.7677	-501.013	0.719386	-8.66929	36.9728	-320.528	-0.585384	0.49216	0.450255	8.51466	28.9	2
Serenut 11T	Virginia	1	3	NaSARRI	2020A	R4	6	12.5	0.82	0.465484	69.6905	0.180689	53.972	-10.3755	24.5698	-254.925	0.632936	-2.62521	30.242	-79.3914	-0.785916	0.357516	0.331981	7.14225	28.8	2
Serenut 8R	Virginia	1	3	NaSARRI	2020A	R4	8	10	0.66	0.456521	38.8868	0.161874	50.9223	-1.47457	20.3185	-29.9611	0.217134	8.26544	23.7439	196.254	-1.88181	0.127551	0.111351	12.7013	28.1	2
ICGV-SM 99568	Spanish	1	4	NaSARRI	2020A	R4	12	19.5	0.7	0.403698	78.1143	0.221328	48.6857	-13.4092	26.1844	-351.113	0.709924	-6.33729	31.2438	-198.001	-0.619644	0.465804	0.420848	9.65119	29.8	4
ICGV-SM 88710	Virginia	1	4	NaSARRI	2020A	R4	16	17	0.82	0.434881	86.5083	0.24304	53.7345	-19.0728	30.9406	-590.122	0.786961	-12.4417	37.8376	-470.766	-0.475745	0.549719	0.51163	6.92881	28.9	3
SGV 0071	Virginia	1	4	NaSARRI	2020A	R4	9	17	0.83	0.462587	79.3011	0.212134	55.2052	-14.9732	28.4196	-425.532	0.719629	-7.62917	35.0892	-267.701	-0.605238	0.443869	0.415985	6.28198	27.1	2
SGV 0084	Virginia	1	4	NaSARRI	2020A	R4	15	12	0.82	0.451448	65.9874	0.182298	52.2535	-9.12431	23.836	-217.487	0.596244	-1.18732	28.9601	-34.3847	-0.859551	0.3249	0.300264	7.58249	27	3
ICGV 01514	Spanish	1	4	NaSARRI	2020A	R4	11	18	0.77	0.452415	73.9982	0.209145	53.5315	-12.5821	27.0671	-340.559	0.668258	-4.79603	32.9898	-158.22	-0.701127	0.404868	0.365033	9.83907	27.2	3
RedBeauty	Valencia	1	4	NaSARRI	2020A	R4	14	28.5	0.84	0.436219	83.9645	0.250352	53.79	-18.2886	31.3127	-572.666	0.762377	-11.2464	38.0341	-427.745	-0.512878	0.541604	0.489624	9.59741	27.7	5
ICGV-SM 03702	Virginia	1	4	NaSARRI	2020A	R4	15	13.5	0.74	0.436598	85.2939	0.207285	52.7409	-16.4686	27.4071	-451.355	0.778532	-10.0725	33.8771	-341.228	-0.507336	0.532274	0.498211	6.39964	27.4	2
SGV 0023	Virginia	1	4	NaSARRI	2020A	R4	8	13.5	0.75	0.443632	76.7111	0.185533	52.1853	-12.331	24.7083	-304.678	0.700906	-5.34872	30.4092	-162.651	-0.654566	0.423391	0.394019	6.93728	29.7	2
SGV 990400	Virginia	1	4	NaSARRI	2020A	R4	4	13.5	0.79	0.444218	52.3565	0.17097	50.5336	-5.37215	21.6346	-116.224	0.455044	3.18936	25.7587	82.1536	-1.18578	0.226068	0.204366	9.59949	28.5	1
ICGV-SM 16501	Spanish	1	4	NaSARRI	2020A	R4	13	19	0.77	0.425045	78.9944	0.267219	52.3726	-16.3834	31.5035	-516.133	0.711166	-8.57589	37.4621	-321.271	-0.592845	0.488817	0.448221	8.30491	31.5	4
ICGVS-SM 0205	Spanish	1	5	NaSARRI	2020A	R4	7	11	0.61	0.436319	50.8626	0.197498	50.0422	-5.06384	23.4456	-118.725	0.410976	4.3494	27.3755	119.067	-1.27881	0.203525	0.164525	19.1621	31.9	3
ICGV 9555	Spanish	1	5	NaSARRI	2020A	R4	15	12	0.73	0.439394	68.5477	0.216883	51.8489	-10.7209	26.6205	-285.396	0.611396	-2.38628	31.8483	-75.9987	-0.807787	0.352721	0.311704	11.6287	32	4
SGV 10005	Spanish	1	5	NaSARRI	2020A	R4	9	15.5	0.62	0.426707	48.6227	0.184927	48.6629	-4.25491	21.8407	-92.9302	0.387879	4.77868	25.4136	121.444	-1.34931	0.196461	0.162279	17.3988	32.3	2
ICGV 01515	Spanish	1	5	NaSARRI	2020A	R4	15	17.5	0.75	0.433102	64.3109	0.199205	50.4977	-8.82818	24.4206	-215.59	0.573929	-0.595392	29.1266	-17.3417	-0.89614	0.31649	0.282467	10.7501	33.4	3
Serenut 4T	Spanish	1	5	NaSARRI	2020A	R4	12	17.5	0.72	0.419563	80.4525	0.273696	52.0724	-17.1898	31.9566	-549.327	0.725468	-9.5456	37.9249	-362.016	-0.564866	0.505176	0.456361	9.66309	31.1	3
ICGV 01510	Spanish	1	5	NaSARRI	2020A	R4	19	21.5	0.8	0.420852	84.5253	0.256866	52.2603	-18.4004	31.1141	-572.513	0.768113	-11.4682	37.4774	-429.798	-0.500729	0.557376	0.507358	8.97398	31.5	4
Serenut 9T	Virginia	1	5	NaSARRI	2020A	R4	8	12	0.82	0.431549	71.0483	0.210435	51.0179	-11.1857	25.9111	-289.834	0.639723	-3.32429	31.0948	-103.368	-0.755821	0.369012	0.333191	9.70735	30.3	1
ICGV-SM 96714	Valencia	1	5	NaSARRI	2020A	R4	17	22.5	0.82	0.422896	77.9753	0.262071	51.8834	-15.6273	30.7912	-481.183	0.701301	-7.77337	36.5668	-284.247	-0.612998	0.459215	0.428071	6.7819	30.5	3
SGV 0065	Virginia	1	5	NaSARRI	2020A	R4	14	9	0.8	0.437021	79.9408	0.236284	53.0453	-15.7495	29.4978	-464.575	0.724343	-8.35781	35.736	-298.674	-0.584962	0.467076	0.432362	7.4321	31.1	1
SGV 0047	Virginia	1	5	NaSARRI	2020A	R4	14	10	0.78	0.444769	77.6812	0.220374	53.2777	-14.2445	28.1272	-400.658	0.70297	-6.7427	34.2462	-230.912	-0.631203	0.451575	0.414909	8.11954	31.9	2
ICGV-SM 03702	Virginia	2	1	NaSARRI	2020A	R4	12	12	0.85	0.426771	83.5146	0.220203	51.8041	-16.1332	27.9195	-450.432	0.760585	-9.43539	34.0736	-321.498	-0.531088	0.521948	0.477369	8.54092	30	1
Serenut 4T	Spanish	2	1	NaSARRI	2020A	R4	11	15	0.79	0.448606	81.0874	0.26885	55.3864	-18.2216	33.3419	-607.542	0.731367	-10.4794	40.2279	-421.564	-0.555986	0.54032	0.480054	11.1538	30.9	3
ICGV-SM 99568	Spanish	2	1	NaSARRI	2020A	R4	8	15.5	0.65	0.446612	62.4426	0.185834	51.5997	-8.21202	23.6986	-194.614	0.55982	0.0299769	28.5275	0.855166	-0.93423	0.305623	0.273046	10.6592	31.5	3
ICGV SM 03590	Spanish	2	1	NaSARRI	2020A	R4	7	11	0.89	0.401024	64.9469	0.219169	47.3649	-8.94929	24.6625	-220.712	0.574908	-0.782956	28.7106	-22.4791	-0.88306	0.334056	0.307094	8.07101	31.3	2
12CS-015	Spanish	2	1	NaSARRI	2020A	R4	13	13	0.81	0.443874	74.2952	0.248122	53.5577	-14.0279	30.2597	-424.481	0.663665	-5.68609	36.2161	-205.928	-0.68831	0.445437	0.397182	10.8331	30.9	3
ICGV-SM 16502	Spanish	2	1	NaSARRI	2020A	R4	15	18	0.87	0.421924	81.2669	0.302075	53.2015	-19.0072	34.7141	-659.819	0.73124	-11.1708	40.9229	-457.14	-0.541536	0.561703	0.501305	10.7527	30.3	4
SGV 0805	Valencia	2	1	NaSARRI	2020A	R4	10	15	0.75	0.432528	69.6233	0.226448	51.3766	-11.2391	27.2442	-306.2	0.619964	-2.90091	32.4208	-94.0498	-0.785202	0.382983	0.335558	12.3832	31.6	3
Serenut 9T	Virginia	2	1	NaSARRI	2020A	R4	12	10.5	0.73	0.481893	76.3711	0.194151	56.5875	-13.4418	27.2112	-365.767	0.693432	-5.89887	33.9243	-200.115	-0.662012	0.427916	0.393592	8.02128	31.1	1
ICGV-SM 08556	Spanish	2	1	NaSARRI	2020A	R4	11	22	0.88	0.434419	76.0189	0.231078	52.2331	-13.8097	28.4132	-392.378	0.685271	-6.05449	34.1842	-206.968	-0.657871	0.454196	0.413137	9.03987	31.6	3
Serenut 11T	Virginia	2	1	NaSARRI	2020A	R4	12	13.5	0.76	0.441816	50.6894	0.187765	50.4654	-4.99783	22.8414	-114.157	0.415949	4.22039	26.8588	113.355	-1.27247	0.218241	0.198791	8.91226	30.5	3
ICGV 01502	Spanish	2	2	NaSARRI	2020A	R4	15	20.5	0.8	0.449903	75.755	0.25703	54.6116	-15.1702	31.5834	-479.128	0.677235	-6.81053	37.8842	-258.011	-0.658143	0.478943	0.432869	9.6201	31.2	3
SGV 990400	Virginia	2	2	NaSARRI	2020A	R4	9	19	0.86	0.463422	73.728	0.226588	55.1645	-13.4167	29.2074	-391.867	0.660951	-5.15409	35.5157	-183.051	-0.704626	0.436802	0.388073	11.1559	30.4	1
SGV 0071	Virginia	2	2	NaSARRI	2020A	R4	14	14.5	0.87	0.421662	73.1828	0.241628	50.7838	-12.8068	28.3624	-363.232	0.654828	-4.7106	33.5979	-158.266	-0.709448	0.427312	0.387074	9.41663	29.1	2
ICGV 01510	Spanish	2	2	NaSARRI	2020A	R4	16	16.5	0.8	0.441576	70.155	0.254739	53.0719	-12.5111	30.2496	-378.456	0.6175	-3.56785	35.7907	-127.696	-0.773636	0.411589	0.367611	10.6851	29.8	2
ICGV-SM 95355	Virginia	2	2	NaSARRI	2020A	R4	11	9.5	0.76	0.423672	65.125	0.243822	50.4114	-9.98046	27.8612	-278.068	0.565396	-0.943226	32.5119	-30.6661	-0.887203	0.352467	0.328594	6.77295	28.8	2
DOK 1R	Spanish	2	2	NaSARRI	2020A	R4	11	24	0.79	0.467117	70.6106	0.22266	55.2084	-12.1646	28.6909	-349.012	0.629049	-3.56326	34.799	-123.998	-0.76814	0.407124	0.348029	14.5151	30.2	3
ICGVS-SM 0205	Spanish	2	2	NaSARRI	2020A	R4	8	12	0.7	0.45774	46.0604	0.218509	52.3658	-3.57214	25.733	-91.9218	0.301741	7.58223	29.7127	225.289	-1.56914	0.1812	0.15396	15.0332	30.3	3
Serenut 8R	Virginia	2	2	NaSARRI	2020A	R4	6	5.5	0.44	0.448928	39.437	0.19207	50.5551	-1.19468	22.5632	-26.9558	0.177292	9.62644	25.8543	248.885	-2.00145	0.130531	0.109983	15.7417	31.7	1
SGV 10010 ER	Spanish	2	2	NaSARRI	2020A	R4	13	7.5	0.62	0.406238	47.7527	0.199171	46.6004	-3.86232	22.045	-85.145	0.361412	5.30327	25.1437	133.344	-1.41297	0.226559	0.200987	11.2869	31.8	2
SGV 0060	Virginia	2	2	NaSARRI	2020A	R4	11	10	0.84	0.435427	66.9692	0.232019	51.6171	-10.5247	27.6279	-290.775	0.588706	-1.74736	32.689	-57.1192	-0.844941	0.366045	0.339633	7.21557	30.8	2
DOK 1T	Spanish	2	3	NaSARRI	2020A	R4	6	11	0.53	0.436975	40.2851	0.246442	50.0676	-0.754622	26.4842	-19.9856	0.12427	11.8557	29.3525	347.994	-2.17379	0.143387	0.116874	18.4903	32.8	2
ICGV-SM 88710	Virginia	2	3	NaSARRI	2020A	R4	14	10.5	0.61	0.451639	53.0013	0.233258	52.4642	-6.15789	27.3338	-168.318	0.41505	4.44249	31.747	141.035	-1.24325	0.285577	0.252949	11.4252	30.8	1
SGV 0065	Virginia	2	3	NaSARRI	2020A	R4	14	9.5	0.71	0.452214	59.5128	0.240854	53.1351	-8.53279	28.5895	-243.949	0.500116	1.51803	33.5236	50.8899	-1.03139	0.337977	0.302183	10.5905	32	1
RedBeauty	Valencia	2	3	NaSARRI	2020A	R4	15	22	0.67	0.430836	63.9493	0.299647	52.2706	-10.9453	32.8371	-359.41	0.53348	-0.498362	37.5071	-18.6921	-0.923172	0.378983	0.318529	15.9517	33.1	3
ICGV 9555	Spanish	2	3	NaSARRI	2020A	R4	16	13	0.65	0.461016	51.876	0.257923	53.8453	-6.0116	29.8141	-179.231	0.380799	5.69273	34.291	195.209	-1.31709	0.25611	0.220411	13.939	33	3
ICGV-SM 95526	Valencia	2	3	NaSARRI	2020A	R4	20	22	0.82	0.462425	72.3794	0.27936	56.2301	-14.8085	33.9159	-502.243	0.635844	-5.46222	40.2851	-220.046	-0.723526	0.473136	0.416372	11.9975	30.7	3
ICGV 01504	Spanish	2	3	NaSARRI	2020A	R4	16	16	0.73	0.454189	59.1895	0.260648	53.7214	-8.78647	30.3803	-266.936	0.487291	1.84174	35.3288	65.0664	-1.04881	0.332378	0.291204	12.3878	31.3	3
SGV 0080	Virginia	2	3	NaSARRI	2020A	R4	13	13	0.72	0.472513	57.2758	0.223007	54.8464	-7.7779	27.801	-216.233	0.479943	2.40139	33.0174	79.2875	-1.08865	0.325929	0.28399	12.8675	31.8	2
ICGV-SM 01709	Virginia	2	3	NaSARRI	2020A	R4	14	8	0.68	0.458018	52.2502	0.21886	52.8516	-5.87608	26.3314	-154.725	0.414128	4.48463	30.8377	138.295	-1.25479	0.285884	0.251327	12.0878	32.5	2
SGV 0075	Virginia	2	3	NaSARRI	2020A	R4	13	9.5	0.66	0.436761	64.1134	0.241453	51.7557	-9.82318	28.2388	-277.394	0.554155	-0.525586	33.1399	-17.4179	-0.911983	0.370767	0.337207	9.05149	32.4	2
Serenut 5R	Virginia	2	4	NaSARRI	2020A	R4	8	10.5	0.57	0.418942	40.3756	0.273585	48.4725	-0.395727	27.7018	-10.9623	0.0959344	12.7055	29.9887	381.022	-2.28047	0.17735	0.152684	13.9081	32.2	3
SGV 0084	Virginia	2	4	NaSARRI	2020A	R4	16	9	0.68	0.455268	53.6538	0.252556	53.2578	-6.60885	29.2293	-193.172	0.413096	4.5568	33.7474	153.78	-1.23562	0.317947	0.275695	13.2889	32.4	2
ICGV-SM 96714	Valencia	2	4	NaSARRI	2020A	R4	13	11	0.55	0.476225	44.0465	0.253885	54.745	-2.56504	29.4152	-75.4512	0.216192	10.7364	33.4291	358.907	-1.82189	0.20421	0.164801	19.2983	33.5	3
ICGV 01515	Spanish	2	4	NaSARRI	2020A	R4	15	13.5	0.63	0.468621	47.4883	0.254782	54.2434	-4.13423	29.4811	-121.881	0.296645	8.37357	33.6991	282.182	-1.56018	0.23415	0.199605	14.7536	32.8	3
Acholi White	Valencia	2	4	NaSARRI	2020A	R4	9	10.5	0.47	0.483757	41.3471	0.232608	54.9759	-1.48811	27.6327	-41.1204	0.165208	11.6586	31.607	368.493	-2.01761	0.163379	0.138147	15.4438	34.1	3
ICGV 01514	Spanish	2	4	NaSARRI	2020A	R4	12	11.5	0.67	0.485031	41.9013	0.240687	55.2866	-1.66556	28.4594	-47.4009	0.171281	11.7552	32.4808	381.819	-1.9901	0.172193	0.14277	17.0871	33.1	3
Serenut 14R	Virginia	2	4	NaSARRI	2020A	R4	0
ICGV-SM 95714	Valencia	2	4	NaSARRI	2020A	R4	11	13	0.67	0.454106	48.4626	0.254763	52.7509	-4.48379	28.8485	-129.35	0.319454	7.49499	32.8554	246.251	-1.49278	0.248205	0.208621	15.9483	32.8	3
ICGV-SM 01731	Virginia	2	4	NaSARRI	2020A	R4	10	11.5	0.66	0.473145	46.1487	0.223706	54.108	-3.6789	26.8673	-98.8421	0.296638	8.00559	31.1581	249.439	-1.58011	0.216435	0.186899	13.6465	31	3
B7-30-9-3	Spanish	2	4	NaSARRI	2020A	R4	14	9	0.65	0.451	53.5876	0.256241	52.8549	-6.58338	29.3221	-193.039	0.410962	4.60156	33.731	155.215	-1.23907	0.296942	0.254661	14.2388	31.5	3
JL 24	Spanish	2	5	NaSARRI	2020A	R4	7	11	0.65	0.411867	40.6787	0.299102	48.065	-0.200248	29.281	-5.86347	0.0787533	13.5469	31.1917	422.549	-2.34588	0.179348	0.152837	14.7821	33.5	3
SGV 0047	Virginia	2	5	NaSARRI	2020A	R4	8	6	0.48	0.43904	36.9493	0.265461	50.2382	1.31981	27.7254	36.5922	-0.0233389	15.4689	30.0758	465.238	-2.85415	0.132503	0.114511	13.5782	32.1	2
Serenut 6T	Spanish	2	5	NaSARRI	2020A	R4	11	13	0.55	0.454301	42.5106	0.279071	52.6197	-1.46071	30.229	-44.1559	0.150549	12.5145	33.4275	418.328	-2.05093	0.182258	0.157417	13.6299	32	3
SGV 0023	Virginia	2	5	NaSARRI	2020A	R4	14	7.5	0.55	0.476035	40.1679	0.240609	54.1693	-0.794395	27.8373	-22.1138	0.121113	12.7189	31.4864	400.472	-2.18567	0.173154	0.148501	14.2378	33.7	3
ICGV-SM 16501	Spanish	2	5	NaSARRI	2020A	R4	10	10	0.5	0.473425	37.2517	0.243328	53.6593	0.773749	27.6288	21.3778	0.0162448	14.9599	30.8594	461.653	-2.6521	0.101865	0.0787153	22.7261	33.9	4
ICGV-SM 16520	Spanish	2	5	NaSARRI	2020A	R4	14	10.5	0.5	0.458704	41.2137	0.265335	52.7677	-0.958284	29.1921	-27.9744	0.125731	12.8831	32.442	417.955	-2.15601	0.155022	0.124196	19.8846	31.6	3
SGV 10005	Spanish	2	5	NaSARRI	2020A	R4	10	9.5	0.4	0.451565	33.8594	0.249406	51.0885	2.71159	26.7167	72.4448	-0.1369	17.2575	29.0706	501.685	-3.53763	0.0704026	0.0506738	28.0228	34.4	2
Serenut 7T	Virginia	2	5	NaSARRI	2020A	R4	5	7	0.48	0.463702	39.1659	0.236536	52.7072	-0.362896	26.8228	-9.73388	0.0967084	12.8208	30.1493	386.539	-2.28989	0.134385	0.11189	16.7392	30.3	3
ICGV 02501	Spanish	2	5	NaSARRI	2020A	R4	15	14	0.56	0.447184	50.5613	0.27009	52.4269	-5.34377	29.9807	-160.21	0.349284	6.63008	33.962	225.17	-1.39744	0.262255	0.212911	18.8155	31.4	3
SGV 07010	Virginia	2	5	NaSARRI	2020A	R4	11	10	0.61	0.441771	50.326	0.25778	51.6032	-5.1678	28.6551	-148.084	0.354238	6.32977	32.5519	206.046	-1.39158	0.273585	0.231234	15.48	31.4	3
SGV 10010 ER	Spanish	1	1	Nakabango	2020A	R4	10	7	0.64	0.32664	30.7175	0.198148	36.7422	1.95149	17.2902	33.7416	-0.11647	10.6954	17.7275	189.603	-3.41418	0.221143	0.210976	4.5975		3		10
Serenut 14R	Virginia	1	1	Nakabango	2020A	R4	6	9	0.76	0.31066	27.8008	0.208823	34.8484	3.23436	17.0104	55.0178	-0.302429	12.1173	16.865	204.358	-4.86841	0.192331	0.184371	4.13892		2		17
DOK 1T	Spanish	1	1	Nakabango	2020A	R4	8	11.5	0.72	0.304241	42.3586	0.195697	34.8607	-1.81408	17.0153	-30.8672	0.283829	5.36281	17.7894	95.401	-1.64988	0.271466	0.254468	6.2616		3		38
ICGV SM 03590	Spanish	1	1	Nakabango	2020A	R4	5	11.3	0.69	0.306059	41.4266	0.202722	35.0929	-1.50466	17.4646	-26.2782	0.250852	5.95967	18.1785	108.338	-1.7504	0.244827	0.23465	4.1569		2		0
ICGV 02501	Spanish	1	1	Nakabango	2020A	R4	8	17.5	0.77	0.306207	46.8266	0.199757	35.3531	-2.94572	17.6369	-51.9535	0.365638	4.14785	18.6435	77.3303	-1.40629	0.283692	0.266262	6.14417		3		38
SGV 0080	Virginia	1	1	Nakabango	2020A	R4	6	12.4	0.6	0.313171	46.4599	0.192722	36.0481	-2.89197	17.5007	-50.6115	0.363859	4.21035	18.6599	78.5648	-1.41559	0.278703	0.269296	3.3751		3		67
JL 24	Spanish	1	1	Nakabango	2020A	R4	5	13.1	0.71	0.307804	21.8159	0.202093	34.0753	5.53407	15.9884	88.4809	-0.791676	14.7377	15.3882	226.786	-17.6464	0.130381	0.122255	6.23232		3		100
Acholi White	Valencia	1	1	Nakabango	2020A	R4	6	13.3	0.8	0.301736	38.5031	0.214866	34.5519	-0.483142	17.7942	-8.59713	0.153874	7.39177	18.1642	134.265	-2.08589	0.206468	0.192114	6.95216		3		67
ICGV-SM 16502	Spanish	1	1	Nakabango	2020A	R4	13	16.6	0.81	0.30562	77.7978	0.209981	36.9639	-10.3159	20.2043	-208.426	0.718012	-4.37912	22.5513	-98.7548	-0.61482	0.400812	0.381386	4.84667		4		0
SGV 0060	Virginia	1	1	Nakabango	2020A	R4	7	11.8	0.8	0.318222	38.7426	0.183248	36.1301	-0.935728	16.627	-15.5584	0.208561	6.46793	17.539	113.441	-1.90595	0.247053	0.235716	4.58896		3		57
SGV 0075	Virginia	1	2	Nakabango	2020A	R4	12	14.4	0.78	0.318864	60.6341	0.205426	37.5295	-6.30945	19.4057	-122.439	0.547215	0.506038	21.2824	10.7697	-0.954633	0.335646	0.323488	3.62212		3		8
ICGV 01502	Spanish	1	2	Nakabango	2020A	R4	11	15.8	0.6	0.312253	33.3431	0.201082	35.317	1.00897	17.0603	17.2133	-0.00105195	9.17435	17.4132	159.755	-2.76955	0.209885	0.188367	10.2524		4		91
SGV 07010	Virginia	1	2	Nakabango	2020A	R4	4	6.9	0.78	0.317603	26.7489	0.174981	35.329	2.61854	15.2763	40.0015	-0.237014	10.6177	15.516	164.744	-4.26113	0.167591	0.160773	4.06842		2		100
Serenut 5R	Virginia	1	2	Nakabango	2020A	R4	5	9	0.76	0.315636	20.7933	0.161281	34.6759	4.20916	13.9685	58.7956	-0.596535	12.1401	13.9117	168.889	-9.03866	0.156762	0.151893	3.10573		2		60
12CS-015	Spanish	1	2	Nakabango	2020A	R4	9	14.8	0.72	0.302704	42.352	0.227277	35.0076	-1.5631	18.8345	-29.4403	0.239569	6.3909	19.3547	123.694	-1.77213	0.248062	0.226168	8.82579		4		78
DOK 1R	Spanish	1	2	Nakabango	2020A	R4	6	12.8	0.68	0.317221	28.7406	0.159243	35.2929	1.47294	14.4776	21.3246	-0.067541	8.73531	14.9804	130.858	-3.13533	0.198945	0.186361	6.32516		3		0
B7-30-9-3	Spanish	1	2	Nakabango	2020A	R4	8	12.8	0.7	0.298341	53.293	0.238357	35.2324	-4.66081	20.0324	-93.3671	0.440647	2.76809	20.978	58.0689	-1.18408	0.302325	0.281889	6.75958		4		50
ICGV-SM 08556	Spanish	1	2	Nakabango	2020A	R4	12	18	0.75	0.310919	65.1955	0.214144	36.9526	-7.33614	19.8484	-145.611	0.59154	-0.690272	21.7183	-14.9915	-0.855585	0.34816	0.330506	5.07076		1		25
Serenut 7T	Virginia	1	2	Nakabango	2020A	R4	6	12	0.77	0.328767	38.7122	0.21279	37.6125	-0.57289	18.911	-10.8339	0.153574	7.97954	19.8193	158.149	-2.08717	0.224102	0.21642	3.42786		2		33
ICGV-SM 01709	Virginia	1	2	Nakabango	2020A	R4	5	9.2	0.65	0.332877	26.1438	0.187506	37.0599	3.40116	16.5406	56.2571	-0.339641	12.4147	16.8372	209.029	-5.21016	0.180872	0.171754	5.04103		2		40
ICGV-SM 95526	Valencia	1	3	Nakabango	2020A	R4	10	21.1	0.66	0.327475	51.346	0.255574	38.7484	-4.49182	22.5483	-101.283	0.391712	4.10757	23.9515	98.3824	-1.29818	0.332026	0.301799	9.10365		4		40
ICGV-SM 95355	Virginia	1	3	Nakabango	2020A	R4	5	14.8	0.68	0.299257	40.6159	0.235571	34.5892	-0.940028	19.0282	-17.887	0.185045	7.25134	19.3069	140.001	-1.95765	0.239271	0.229944	3.89784		2		0
Serenut 6T	Spanish	1	3	Nakabango	2020A	R4	6	11.6	0.5	0.315302	20.4156	0.204088	34.8177	6.35965	16.2954	103.633	-0.980206	16.1204	15.6457	252.215	-58.5634	0.126486	0.108942	13.8701		4		100
ICGV-SM 16520	Spanish	1	3	Nakabango	2020A	R4	13	11.9	0.68	0.299979	37.7591	0.236096	34.5022	0.0536559	18.8782	1.01293	0.095472	8.51111	18.9788	161.531	-2.30996	0.229349	0.202619	11.6548		4		54
ICGV 01504	Spanish	1	3	Nakabango	2020A	R4	10	18.3	0.62	0.309386	35.8231	0.22047	35.311	0.518688	18.2672	9.475	0.0513439	8.98723	18.557	166.776	-2.51134	0.229628	0.210058	8.52239		4		60
SGV 0805	Valencia	1	3	Nakabango	2020A	R4	8	14.6	0.62	0.308457	37.6518	0.231502	35.4253	0.0258768	19.0136	0.492011	0.0974721	8.6208	19.3136	166.499	-2.3035	0.231178	0.219526	5.04052		2		63
ICGV-SM 01731	Virginia	1	3	Nakabango	2020A	R4	6	13.6	0.74	0.321724	29.4407	0.20095	36.1301	2.49077	17.1463	42.7075	-0.190445	11.3085	17.3787	196.527	-3.91603	0.185981	0.179753	3.34883		2		50
ICGV-SM 95714	Valencia	1	3	Nakabango	2020A	R4	14	16.8	0.74	0.323782	54.671	0.245411	38.3804	-5.40019	21.9296	-118.424	0.451835	2.64664	23.5038	62.206	-1.15067	0.316548	0.300049	5.21194		3		29
Serenut 11T	Virginia	1	3	Nakabango	2020A	R4	8	12.8	0.75	0.315885	55.6722	0.222487	37.1893	-5.32388	20.0817	-106.913	0.47898	2.02657	21.6172	43.8087	-1.09971	0.321714	0.309237	3.87821		3		0
Serenut 8R	Virginia	1	3	Nakabango	2020A	R4	4	9.4	0.72	0.329717	21.6427	0.195624	36.4437	5.65541	16.4915	93.2664	-0.786644	15.4558	16.2562	251.254	-17.0585	0.126643	0.121481	4.07632		2		0
ICGV-SM 99568	Spanish	1	4	Nakabango	2020A	R4	5	21.4	0.76	0.314996	30.4084	0.242075	35.7593	3.19838	19.3388	61.8529	-0.256513	13.117	19.0741	250.194	-4.48332	0.170116	0.15632	8.10954		3		60
ICGV-SM 88710	Virginia	1	4	Nakabango	2020A	R4	5	13.3	0.6	0.304577	21.7384	0.199625	33.7053	5.35026	15.7308	84.1637	-0.764512	14.3233	15.125	216.64	-15.7903	0.122232	0.117084	4.21197		2		60
SGV 0071	Virginia	1	4	Nakabango	2020A	R4	12	14.3	0.77	0.307782	64.9181	0.224618	36.7308	-7.40113	20.3701	-150.762	0.583994	-0.600091	22.1255	-13.2773	-0.865117	0.362275	0.349266	3.59109		2		25
SGV 0084	Virginia	1	4	Nakabango	2020A	R4	8	12.6	0.73	0.309532	42.5279	0.222499	35.7534	-1.67345	18.8818	-31.5977	0.248055	6.32518	19.587	123.891	-1.74678	0.258502	0.249337	3.54537		3		38
ICGV 01514	Spanish	1	4	Nakabango	2020A	R4	14	15.3	0.78	0.319343	72.194	0.214763	38.3374	-9.26269	20.8139	-192.792	0.660478	-2.81494	23.2313	-65.3946	-0.717895	0.394188	0.375781	4.66967		4		0
RedBeauty	Valencia	1	4	Nakabango	2020A	R4	10	13.7	0.64	0.321252	40.0724	0.233099	37.0599	-0.805054	19.938	-16.0512	0.166035	8.00755	20.6356	165.241	-2.0284	0.253349	0.229151	9.55125		4		80
ICGV-SM 03702	Virginia	1	4	Nakabango	2020A	R4	5	7.7	0.53	0.3191	23.1612	0.195017	35.3832	4.76991	16.1832	77.1923	-0.607401	13.9493	15.9501	222.492	-9.63063	0.149501	0.143037	4.32338		4		0
SGV 0023	Virginia	1	4	Nakabango	2020A	R4	10	9.3	0.65	0.313183	59.3656	0.210375	36.8845	-6.00548	19.3821	-116.399	0.530968	0.869443	21.0602	18.3106	-0.987678	0.348665	0.335104	3.88958		3		0
SGV 990400	Virginia	1	4	Nakabango	2020A	R4	7	20.3	0.81	0.314023	47.006	0.211101	36.3917	-3.05823	18.7223	-57.2571	0.356289	4.47384	19.8431	88.775	-1.42443	0.286341	0.275583	3.75722		3		0
ICGV-SM 16501	Spanish	1	4	Nakabango	2020A	R4	11	10.4	0.7	0.311879	45.9029	0.279631	36.8788	-2.52447	22.7491	-57.4295	0.26829	6.67871	23.2538	155.306	-1.64622	0.28216	0.257205	8.84418		3		27
ICGVS-SM 0205	Spanish	1	5	Nakabango	2020A	R4	7	10	0.52	0.323195	21.9871	0.259893	36.1418	8.29911	19.9982	165.967	-1.14955	20.6477	18.7289	386.707	41.7666	0.114451	0.0986081	13.8428		4		100
ICGV 9555	Spanish	1	5	Nakabango	2020A	R4	10	17.9	0.66	0.317983	38.5009	0.270952	36.9639	0.292402	21.9358	6.41407	0.0624993	10.2419	22.0836	226.178	-2.43936	0.251475	0.220704	12.2361		3		30
SGV 10005	Spanish	1	5	Nakabango	2020A	R4	7	14.1	0.58	0.300869	33.0223	0.241526	34.3398	1.9274	18.8617	36.3541	-0.103422	11.0074	18.5817	204.536	-3.33426	0.189235	0.175809	7.09528		4		43
ICGV 01515	Spanish	1	5	Nakabango	2020A	R4	13	14.5	0.67	0.327955	45.7626	0.238045	38.235	-2.70702	21.007	-56.8665	0.299993	5.92748	22.1835	131.492	-1.5711	0.292388	0.275035	5.93491		3		15
Serenut 4T	Spanish	1	5	Nakabango	2020A	R4	9	9.6	0.51	0.313327	29.2641	0.259655	35.6227	4.20883	20.1858	84.9586	-0.378022	14.833	19.5587	290.115	-5.83193	0.162481	0.132691	18.3346		4		78
ICGV 01510	Spanish	1	5	Nakabango	2020A	R4	13	11.2	0.69	0.309968	51.7728	0.258077	36.765	-4.46264	21.7624	-97.1178	0.401295	3.73073	22.7756	84.9695	-1.27246	0.312223	0.290687	6.89763		4		46
Serenut 9T	Virginia	1	5	Nakabango	2020A	R4	8	10.8	0.8	0.328709	57.917	0.229553	38.8963	-6.13034	21.3357	-130.795	0.500971	1.49201	23.2562	34.6985	-1.04323	0.356356	0.341682	4.11792		2		0
ICGV-SM 96714	Valencia	1	5	Nakabango	2020A	R4	10	18.9	0.72	0.32148	52.9024	0.282602	38.5143	-5.05962	24.0554	-121.711	0.402431	3.84422	25.2379	97.0199	-1.25402	0.336247	0.298585	11.2006		4		30
SGV 0065	Virginia	1	5	Nakabango	2020A	R4	7	12.3	0.76	0.330603	53.7547	0.241659	39.0644	-5.16787	21.9754	-113.566	0.438319	3.01541	23.671	71.3777	-1.18613	0.34845	0.32913	5.54469		2		43
SGV 0047	Virginia	1	5	Nakabango	2020A	R4	9	15.7	0.74	0.319854	47.5428	0.239371	37.4296	-3.20916	20.8146	-66.7974	0.336413	5.11687	21.9182	112.153	-1.46254	0.32228	0.305727	5.13621		2		11
ICGV-SM 03702	Virginia	2	1	Nakabango	2020A	R4	2	10.7	0.76	0.312021	19.1672	0.236213	34.5271	8.50984	17.836	151.782	-1.45453	19.7485	16.5125	326.098	15.7697	0.10652	0.0993725	6.71021		2		0
Serenut 4T	Spanish	2	1	Nakabango	2020A	R4	10	10.3	0.59	0.308681	30.4572	0.278518	35.3411	4.07873	21.1572	86.2943	-0.340597	14.981	20.3072	304.221	-5.42002	0.177452	0.147405	16.9326		4		90
ICGV-SM 99568	Spanish	2	1	Nakabango	2020A	R4	10	16	0.67	0.312681	39.5966	0.280449	36.5244	-0.0248108	22.2948	-0.553152	0.0878925	9.88399	22.3202	220.613	-2.32239	0.248624	0.223113	10.2607		3		50
ICGV SM 03590	Spanish	2	1	Nakabango	2020A	R4	3	15	0.8	0.322343	21.1019	0.243871	35.8658	8.05154	18.9279	152.399	-1.18749	19.7969	17.8155	352.69	37.3057	0.118884	0.112055	5.74384		2		33
12CS-015	Spanish	2	1	Nakabango	2020A	R4	9	18.6	0.72	0.311331	51.1734	0.299875	37.424	-4.42478	24.3916	-107.928	0.363879	4.72242	25.0742	118.411	-1.34868	0.320383	0.294477	8.08595		3		0
ICGV-SM 16502	Spanish	2	1	Nakabango	2020A	R4	11	15.8	0.69	0.310026	47.0364	0.298274	36.9582	-2.89166	23.8736	-69.0344	0.280325	6.5746	24.2424	159.384	-1.59724	0.301757	0.271536	10.0151		4		45
SGV 0805	Valencia	2	1	Nakabango	2020A	R4	6	16.3	0.61	0.31596	35.1545	0.275839	36.5244	1.84552	21.8265	40.2813	-0.0805985	12.294	21.5842	265.357	-3.19511	0.209412	0.192648	8.00532		2		117
Serenut 9T	Virginia	2	1	Nakabango	2020A	R4	9	11	0.75	0.323922	47.8684	0.232524	37.8326	-3.33033	20.6241	-68.6852	0.347059	4.91461	21.8741	107.503	-1.43594	0.313441	0.297689	5.02542		2		0
ICGV-SM 08556	Spanish	2	1	Nakabango	2020A	R4	11	19.3	0.72	0.324963	41.9201	0.225755	37.5129	-1.49142	19.793	-29.5197	0.223603	7.06204	20.7413	146.476	-1.82593	0.276472	0.26182	5.29948		4		0
Serenut 11T	Virginia	2	1	Nakabango	2020A	R4	4	13.6	0.75	0.325105	20.5654	0.225106	36.0188	7.51045	17.9211	134.595	-1.14112	18.6248	17.0874	318.249	64.5897	0.12828	0.120705	5.9051		2		0
ICGV 01502	Spanish	2	2	Nakabango	2020A	R4	10	14.3	0.5	0.326751	27.719	0.258905	37.0091	5.121	20.6706	105.854	-0.498018	16.5196	20.1165	332.316	-7.75213	0.167767	0.146611	12.6102		4		90
SGV 990400	Virginia	2	2	Nakabango	2020A	R4	5	19.9	0.85	0.319406	41.7883	0.24385	37.0712	-1.29519	20.6315	-26.7218	0.20022	7.60251	21.3214	162.096	-1.89715	0.268485	0.25274	5.86452		3		0
SGV 0071	Virginia	2	2	Nakabango	2020A	R4	6	7.5	0.65	0.311876	36.5843	0.240918	35.8304	0.584438	19.645	11.4813	0.0414308	9.65898	19.8404	191.639	-2.54881	0.239603	0.224613	6.25614		2		17
ICGV 01510	Spanish	2	2	Nakabango	2020A	R4	15	15.5	0.73	0.334007	56.8414	0.245545	39.696	-6.13453	22.6389	-138.879	0.479255	1.9883	24.574	48.8604	-1.0838	0.367618	0.341806	7.0214		4		27
ICGV-SM 95355	Virginia	2	2	Nakabango	2020A	R4	5	9.7	0.84	0.302861	33.9978	0.261828	34.8054	1.99689	20.1977	40.3327	-0.103838	11.6669	19.7875	230.859	-3.33909	0.201112	0.191413	4.82271		2		0
DOK 1R	Spanish	2	2	Nakabango	2020A	R4	8	19.8	0.74	0.33164	69.4062	0.234613	39.966	-9.29015	22.6389	-210.319	0.624989	-2.19378	25.2195	-55.326	-0.77519	0.420913	0.386383	8.20368		3		0
ICGVS-SM 0205	Spanish	2	2	Nakabango	2020A	R4	6	18.4	0.72	0.312517	46.2422	0.301845	37.2342	-2.5644	24.171	-61.984	0.257029	7.14725	24.4952	175.074	-1.67007	0.282582	0.257369	8.92233		3		33
Serenut 8R	Virginia	2	2	Nakabango	2020A	R4	4	10.6	0.79	0.326561	27.3159	0.222013	36.6793	4.06989	18.4334	75.0218	-0.399635	14.0879	18.3302	258.234	-5.99322	0.191096	0.182106	4.70476		2		75
SGV 10010 ER	Spanish	2	2	Nakabango	2020A	R4	9	13.4	0.64	0.327731	33.3954	0.21145	37.1388	1.30143	18.351	23.8825	-0.0334001	10.2752	18.875	193.944	-2.93235	0.239478	0.227815	4.87007		3		22
SGV 0060	Virginia	2	2	Nakabango	2020A	R4	7	12.1	0.78	0.316587	44.0608	0.218116	36.6048	-2.22289	19.074	-42.3993	0.289089	5.73224	20.0459	114.908	-1.61804	0.298746	0.281095	5.90822		2		43
DOK 1T	Spanish	2	3	Nakabango	2020A	R4	4	12.1	0.61	0.330897	19.2646	0.215708	36.5071	7.81947	17.5053	136.882	-1.27636	18.9658	16.7596	317.859	28.7897	0.120961	0.110593	8.5714		2		0
ICGV-SM 88710	Virginia	2	3	Nakabango	2020A	R4	8	14.3	0.68	0.327868	28.6727	0.238975	37.0543	4.01404	19.6275	78.7855	-0.362844	14.5452	19.4564	282.997	-5.58289	0.185358	0.173008	6.66255		2		50
SGV 0065	Virginia	2	3	Nakabango	2020A	R4	8	11.4	0.64	0.318572	42.6109	0.237927	36.9639	-1.62177	20.2848	-32.8972	0.228909	7.02193	21.0616	147.893	-1.80081	0.292156	0.274896	5.90783		3		50
RedBeauty	Valencia	2	3	Nakabango	2020A	R4	13	17.7	0.65	0.314965	44.6597	0.250189	36.8163	-2.22988	21.0282	-46.8904	0.266293	6.46066	21.7667	140.627	-1.66977	0.291873	0.267466	8.36206		3		54
ICGV 9555	Spanish	2	3	Nakabango	2020A	R4	12	16.1	0.62	0.298326	38.1092	0.276642	34.7192	0.477853	21.1415	10.1025	0.0482048	9.93608	20.8144	206.813	-2.50461	0.229665	0.206377	10.1397		4		67
ICGV-SM 95526	Valencia	2	3	Nakabango	2020A	R4	12	19.9	0.79	0.30744	60.3721	0.296119	37.5073	-7.30479	24.6241	-179.874	0.504407	0.969344	25.8151	25.0237	-0.997628	0.36677	0.333337	9.11547		4		25
ICGV 01504	Spanish	2	3	Nakabango	2020A	R4	12	18.1	0.73	0.312087	47.5656	0.297999	37.2342	-3.08429	24.0111	-74.0572	0.290744	6.3874	24.4672	156.282	-1.56472	0.288309	0.260509	9.64237		3		25
SGV 0080	Virginia	2	3	Nakabango	2020A	R4	11	14.5	0.8	0.315755	76.14	0.262977	39.0696	-11.7924	24.2883	-286.417	0.689975	-4.92943	26.8148	-132.181	-0.637834	0.45225	0.435047	3.80384		2		0
ICGV-SM 01709	Virginia	2	3	Nakabango	2020A	R4	6	13	0.81	0.32552	36.4842	0.250534	37.4685	0.834862	20.8977	17.4467	0.0156805	10.6621	21.2416	226.479	-2.66883	0.23945	0.226718	5.31734		2		0
SGV 0075	Virginia	2	3	Nakabango	2020A	R4	9	11.8	0.68	0.330342	41.9016	0.247422	38.3696	-1.32721	21.441	-28.4566	0.195826	7.98196	22.3283	178.223	-1.90992	0.266608	0.252427	5.31905		2		22
Serenut 5R	Virginia	2	4	Nakabango	2020A	R4	5	10.1	0.61	0.319727	18.5205	0.213205	35.2143	7.8338	16.8195	131.76	-1.36872	18.4763	15.9032	293.832	21.2191	0.117314	0.109596	6.57958		3		0
SGV 0084	Virginia	2	4	Nakabango	2020A	R4	7	9.7	0.67	0.327039	23.3778	0.216764	36.4033	5.71125	17.787	101.586	-0.720612	16.0819	17.3935	279.721	-14.0487	0.167923	0.158715	5.48352		2		100
ICGV-SM 96714	Valencia	2	4	Nakabango	2020A	R4	8	14.3	0.6	0.317211	26.7526	0.249418	35.789	5.16187	19.5569	100.95	-0.540679	15.9447	18.8901	301.198	-8.57582	0.170281	0.148568	12.7511		4		63
ICGV 01515	Spanish	2	4	Nakabango	2020A	R4	10	16.1	0.59	0.315598	27.1879	0.251251	35.6524	4.99212	19.6071	97.8811	-0.511318	15.7056	18.9335	297.361	-7.95648	0.177144	0.158604	10.4658		3		90
Acholi White	Valencia	2	4	Nakabango	2020A	R4	6	11.6	0.68	0.318791	29.763	0.251906	36.2176	3.82519	20.0457	76.6787	-0.328119	14.3296	19.6568	281.674	-5.21337	0.182936	0.166842	8.79752		4		133
ICGV 01514	Spanish	2	4	Nakabango	2020A	R4	12	15	0.7	0.315032	38.011	0.251185	36.3917	0.199295	20.5459	4.09469	0.0750195	9.53516	20.8051	198.38	-2.39123	0.251943	0.23305	7.49897		3		50
Serenut 14R	Virginia	2	4	Nakabango	2020A	R4	7	12.3	0.65	0.314792	26.7581	0.231411	35.3892	4.5202	18.3857	83.1071	-0.473607	14.5178	17.9293	260.294	-7.12829	0.177738	0.170328	4.1689		3		43
ICGV-SM 95714	Valencia	2	4	Nakabango	2020A	R4	8	16.7	0.7	0.299864	51.8662	0.304239	36.1593	-4.51773	23.9781	-108.327	0.374137	4.35322	24.3909	106.179	-1.31878	0.307458	0.284731	7.39173		2		38
ICGV-SM 01731	Virginia	2	4	Nakabango	2020A	R4	3	10.2	0.73	0.309518	19.76	0.247672	34.3586	8.6885	18.4213	160.053	-1.43272	20.2168	16.9346	342.363	15.8402	0.0988917	0.0926076	6.35458		2		0
B7-30-9-3	Spanish	2	4	Nakabango	2020A	R4	8	12.9	0.65	0.300109	44.7636	0.301158	35.6524	-1.91472	23.2167	-44.4534	0.223082	7.53582	23.1638	174.558	-1.78612	0.279816	0.249802	10.7264		4		38
JL 24	Spanish	2	5	Nakabango	2020A	R4	4	6	0.3	0.333532	12.4132	0.247855	36.3801	14.2042	18.8296	267.46	-4.69458	28.8647	16.6111	479.474	3.95212	0.0338907	0.0269973	20.34		4		100
SGV 0047	Virginia	2	5	Nakabango	2020A	R4	10	8.7	0.69	0.323314	27.7762	0.241756	36.4956	4.48039	19.4774	87.2665	-0.435129	15.0613	19.114	287.881	-6.56589	0.214843	0.197529	8.0587		3		100
Serenut 6T	Spanish	2	5	Nakabango	2020A	R4	6	11.8	0.44	0.329264	18.1622	0.261704	36.4956	10.9142	20.0137	218.433	-1.96328	24.5298	18.3005	448.909	7.99919	0.0895094	0.0754581	15.6981		4		100
SGV 0023	Virginia	2	5	Nakabango	2020A	R4	9	9.4	0.72	0.322313	38.396	0.231952	37.0543	-0.194685	19.7855	-3.85194	0.113887	8.78003	20.3894	179.019	-2.23401	0.276901	0.26479	4.37357		2		0
ICGV-SM 16501	Spanish	2	5	Nakabango	2020A	R4	8	11	0.69	0.310587	31.8699	0.276312	35.6524	3.36082	21.2485	71.4126	-0.249985	14.0619	20.5992	289.664	-4.46595	0.195958	0.170612	12.9346		4		88
ICGV-SM 16520	Spanish	2	5	Nakabango	2020A	R4	12	15.5	0.67	0.314819	46.5238	0.292271	37.4129	-2.71881	23.7395	-64.5433	0.27087	6.80871	24.234	165.003	-1.63051	0.298312	0.270381	9.36296		4		25
SGV 10005	Spanish	2	5	Nakabango	2020A	R4	9	15.8	0.71	0.320833	38.0355	0.255573	37.0994	0.24248	21.1039	5.11727	0.069302	9.88124	21.4377	211.831	-2.41461	0.244668	0.226928	7.25098		3		22
Serenut 7T	Virginia	2	5	Nakabango	2020A	R4	4	13	0.74	0.311405	32.8888	0.268524	35.7593	2.70069	20.9409	56.5547	-0.176785	13.0444	20.5023	267.439	-3.84809	0.20168	0.192102	4.7492		2		0
ICGV 02501	Spanish	2	5	Nakabango	2020A	R4	9	15.4	0.71	0.308407	56.8314	0.286674	37.2678	-6.14486	23.8219	-146.382	0.461453	2.22794	24.8956	55.466	-1.10377	0.361333	0.325751	9.84748		3		22
SGV 07010	Virginia	2	5	Nakabango	2020A	R4	7	11.7	0.62	0.307683	36.9658	0.247656	35.4433	0.516032	19.8765	10.2569	0.0475399	9.60999	19.9555	191.772	-2.51778	0.246474	0.235931	4.27774		2		0
SGV 10010 ER	Spanish	1	1	NaSARRI	2020A	R7	6	11	0.6	0.429317	48.9101	0.311847	50.9896	-4.4766	32.182	-144.066	0.290855	8.57545	35.2893	302.621	-1.54669	0.279335	0.147924	47.0444	31	5		100	2
Serenut 14R	Virginia	1	1	NaSARRI	2020A	R7	4	10	0.83	0.418239	52.3976	0.330713	50.3862	-6.12456	33.3448	-204.222	0.352096	6.49595	36.4031	236.473	-1.35564	0.361798	0.216451	40.1734	33.2	5		0	1
DOK 1T	Spanish	1	1	NaSARRI	2020A	R7	5	17	0.79	0.437044	50.2877	0.326183	52.2331	-5.25306	33.9525	-178.354	0.311054	8.16511	37.2614	304.243	-1.47615	0.325524	0.177855	45.3635	34	6		60	2
ICGV SM 03590	Spanish	1	1	NaSARRI	2020A	R7	6	16	0.85	0.394378	68.5525	0.386244	50.2599	-14.1764	37.7101	-534.593	0.573922	-3.70509	41.3587	-153.238	-0.795714	0.533728	0.390969	26.7475	36.3	4		0	1
ICGV 02501	Spanish	1	1	NaSARRI	2020A	R7	13	21	0.69	0.448279	57.7653	0.341969	54.5318	-9.23385	36.7698	-339.527	0.435449	3.44307	41.0529	141.348	-1.12655	0.41109	0.211523	48.5457	33.4	6		23	2
SGV 0080	Virginia	1	1	NaSARRI	2020A	R7	12	20	0.86	0.423487	71.9113	0.33175	52.9385	-15.2893	35.9783	-550.085	0.623305	-5.62627	41.1463	-231.5	-0.722591	0.577066	0.42249	26.7864	34.8	5		33	3
JL 24	Spanish	1	1	NaSARRI	2020A	R7	6	20	0.71	0.421179	53.0095	0.339546	50.9329	-6.51655	34.2875	-223.436	0.359609	6.28878	37.404	235.225	-1.32936	0.35424	0.176424	50.1964	34.3	6		33	3
Acholi White	Valencia	1	1	NaSARRI	2020A	R7	9	26	0.64	0.398197	53.1491	0.353297	48.5374	-6.37262	33.8205	-215.525	0.357954	6.11001	36.2568	221.529	-1.32812	0.333907	0.15553	53.421	36.8	6		22	2
ICGV-SM 16502	Spanish	1	1	NaSARRI	2020A	R7	13	25	0.78	0.388177	64.4012	0.410895	49.5137	-12.3132	38.5085	-474.161	0.513806	-0.909548	41.2937	-37.5586	-0.911602	0.487728	0.245964	49.5693	35	6		62	4
SGV 0060	Virginia	1	1	NaSARRI	2020A	R7	9	20	0.86	0.405421	74.4741	0.357958	51.7142	-16.918	37.1852	-629.101	0.650344	-7.60267	42.0126	-319.408	-0.660076	0.61662	0.445391	27.7689	33.9	5		11	2
SGV 0075	Virginia	1	2	NaSARRI	2020A	R7	13	18	0.8	0.427024	68.0525	0.285258	51.9041	-12.2137	31.834	-388.813	0.586655	-2.65612	36.8081	-97.7668	-0.819291	0.451496	0.352794	21.8612	34.9	4		31	2
ICGV 01502	Spanish	1	2	NaSARRI	2020A	R7	14	31	0.77	0.442109	53.0981	0.298882	52.5927	-6.57468	32.3435	-212.648	0.379511	5.68902	36.2969	206.494	-1.2967	0.322183	0.199419	38.1038	35.5	6		43	3
SGV 07010	Virginia	1	2	NaSARRI	2020A	R7	9	12	0.81	0.448602	64.2123	0.289005	54.0886	-11.1781	33.0141	-369.035	0.538946	-0.666869	38.2059	-25.4783	-0.916391	0.452756	0.326964	27.7837	35.2	4		33	3
Serenut 5R	Virginia	1	2	NaSARRI	2020A	R7	4	11	0.74	0.400419	45.754	0.245129	46.4867	-3.04925	25.1279	-76.6214	0.277563	7.66313	27.788	212.943	-1.63083	0.211982	0.151572	28.4975	36	4		25	3
12CS-015	Spanish	1	2	NaSARRI	2020A	R7	9	12	0.68	0.422257	63.9408	0.286487	51.025	-10.4925	31.2353	-327.736	0.537939	-0.462299	35.7182	-16.5125	-0.921341	0.381868	0.255583	33.0702	33.9	5		100	4
DOK 1R	Spanish	1	2	NaSARRI	2020A	R7	10	22	0.64	0.400982	61.6586	0.265029	48.0108	-8.84972	28.0669	-248.384	0.519547	0.605281	31.8776	19.2949	-0.975538	0.372725	0.250173	32.88	33.6	6		10	2
B7-30-9-3	Spanish	1	2	NaSARRI	2020A	R7	12	18	0.75	0.43422	68.935	0.330431	53.816	-14.0247	36.1851	-507.486	0.586791	-3.72721	41.3353	-154.065	-0.794748	0.478694	0.299739	37.384	36.1	6		58	4
ICGV-SM 08556	Spanish	1	2	NaSARRI	2020A	R7	11	24	0.64	0.431069	54.7052	0.274532	51.0638	-6.95282	29.8843	-207.78	0.420372	4.14583	33.8614	140.384	-1.20484	0.326432	0.214514	34.2852	34	6		36	3
Serenut 7T	Virginia	1	2	NaSARRI	2020A	R7	4	14	0.79	0.445111	53.3382	0.255546	52.175	-6.41186	28.9307	-185.5	0.407889	4.65944	33.1845	154.621	-1.24789	0.326381	0.253913	22.2035	35	4		75	3
ICGV-SM 01709	Virginia	1	2	NaSARRI	2020A	R7	15	16	0.81	0.431061	75.9563	0.311885	53.8421	-16.9135	35.3662	-598.165	0.672431	-8.05476	41.2477	-332.241	-0.639987	0.604358	0.453919	24.8924	35.2	2		20	2
ICGV-SM 95526	Valencia	1	3	NaSARRI	2020A	R7	15	30	0.76	0.419791	58.3192	0.426413	52.9051	-9.97483	41.3918	-412.876	0.419154	3.60599	44.1479	159.197	-1.12546	0.457064	0.239371	47.6285	34.4	6		33	3
ICGV-SM 95355	Virginia	1	3	NaSARRI	2020A	R7	12	17	0.83	0.412945	68.5424	0.362113	51.9694	-14.1049	37.2415	-525.29	0.577114	-3.63011	41.5864	-150.963	-0.799634	0.58304	0.434887	25.4104	33.9	4		25	2
Serenut 6T	Spanish	1	3	NaSARRI	2020A	R7	13	13	0.55	0.449434	40.8758	0.352636	52.9986	0.588246	35.6693	20.9823	0.0228238	17.6869	37.6315	665.585	-2.59344	0.177498	0.0678411	61.7792	36.8	7		15	2
ICGV-SM 16520	Spanish	1	3	NaSARRI	2020A	R7	12	24	0.69	0.436622	46.9959	0.346688	52.1785	-3.39613	35.1444	-119.355	0.22236	11.3376	37.817	428.754	-1.75239	0.283813	0.158963	43.9902	33.4	5		25	2
ICGV 01504	Spanish	1	3	NaSARRI	2020A	R7	13	22	0.73	0.423567	59.8423	0.293145	50.9684	-9.05607	31.4594	-284.899	0.484449	1.66085	35.6072	59.1384	-1.03782	0.389971	0.268514	31.1451	35.5	6		23	2
SGV 0805	Valencia	1	3	NaSARRI	2020A	R7	6	19	0.7	0.42067	48.3245	0.294694	49.6945	-4.15203	30.2787	-125.718	0.290823	8.2526	33.2754	274.609	-1.5574	0.269824	0.192369	28.7057	35.1	5		50	3
ICGV-SM 01731	Virginia	1	3	NaSARRI	2020A	R7	12	14	0.76	0.431324	72.0966	0.241319	51.7764	-12.5879	28.7228	-361.559	0.642292	-4.25192	34.1205	-145.077	-0.733218	0.488831	0.388981	20.4262	32.9	5		25	2
ICGV-SM 95714	Valencia	1	3	NaSARRI	2020A	R7	8	14	0.72	0.407843	52.4956	0.284591	48.4458	-5.84007	29.1667	-170.336	0.379932	5.29836	32.3415	171.357	-1.30655	0.3005	0.201532	32.9345	35.1	6		38	2
Serenut 11T	Virginia	1	3	NaSARRI	2020A	R7	9	15	0.78	0.408601	75.7581	0.264233	50.0531	-14.342	29.8698	-428.392	0.678671	-6.34253	35.0332	-222.199	-0.653456	0.542011	0.448201	17.3079	34.8	6		22	2
Serenut 8R	Virginia	1	3	NaSARRI	2020A	R7	5	14	0.82	0.435758	50.1127	0.233576	50.5264	-4.9724	26.3377	-130.962	0.369692	5.65361	30.1697	170.568	-1.36476	0.283549	0.221248	21.9719	35.1	5		20	2
ICGV-SM 99568	Spanish	1	4	NaSARRI	2020A	R7	14	21	0.7	0.434072	52.1286	0.258331	50.9081	-5.83506	28.4797	-166.181	0.387093	5.24157	32.3642	169.639	-1.30165	0.321732	0.228937	28.8422	37.6	5		29	3
ICGV-SM 88710	Virginia	1	4	NaSARRI	2020A	R7	13	20	0.75	0.432315	58.7961	0.247639	51.0108	-8.10511	28.0891	-227.665	0.489599	1.83283	32.4914	59.5513	-1.05261	0.387713	0.311182	19.7392	35.5	5		31	2
SGV 0071	Virginia	1	4	NaSARRI	2020A	R7	11	13	0.7	0.466332	48.8341	0.258959	54.1822	-4.71403	29.853	-140.728	0.321311	7.65008	34.14	261.174	-1.48382	0.291222	0.212593	26.9997	35.5	4		9	2
SGV 0084	Virginia	1	4	NaSARRI	2020A	R7	15	12	0.71	0.423885	51.6463	0.372546	51.6656	-5.91907	36.858	-218.165	0.316105	8.08099	39.5193	319.355	-1.43658	0.377901	0.238687	36.8388	36.4	4		13	2
ICGV 01514	Spanish	1	4	NaSARRI	2020A	R7	8	26	0.48	0.466736	39.2354	0.350402	54.6688	1.78479	36.344	64.8666	-0.0441401	20.0176	38.4082	768.841	-2.96153	0.162124	0.0629165	61.1923	33.6	6		38	2
RedBeauty	Valencia	1	4	NaSARRI	2020A	R7	13	21	0.51	0.459205	40.1343	0.357705	54.0627	1.23582	36.5875	45.2155	-0.0129743	19.1638	38.5397	738.568	-2.78287	0.160901	0.0458726	71.4902	35	7		23	2
ICGV-SM 03702	Virginia	1	4	NaSARRI	2020A	R7	9	12	0.7	0.430225	51.5728	0.341281	51.8489	-5.88614	34.8529	-205.149	0.329962	7.49464	38.0047	284.832	-1.41223	0.370074	0.216594	41.4728	35.4	5		67	3
SGV 0023	Virginia	1	4	NaSARRI	2020A	R7	11	17	0.81	0.417452	66.9764	0.350587	52.0793	-13.1467	36.4498	-479.195	0.559197	-2.50096	40.8176	-102.083	-0.84201	0.552779	0.378566	31.5158	35.7	5		18	2
SGV 990400	Virginia	1	4	NaSARRI	2020A	R7	5	21	0.78	0.394501	61.9544	0.340224	48.6819	-10.1297	33.504	-339.387	0.498714	0.640298	36.8119	23.5706	-0.980646	0.473152	0.348921	26.256	35.5	4		20	2
ICGV-SM 16501	Spanish	1	4	NaSARRI	2020A	R7	13	22	0.67	0.408424	59.2281	0.361325	50.451	-9.48629	35.7732	-339.355	0.453368	2.40618	39.0207	93.891	-1.07477	0.426804	0.234092	45.1524	34.8	6		54	3
ICGVS-SM 0205	Spanish	1	5	NaSARRI	2020A	R7	8	18	0.57	0.440623	43.7815	0.31326	51.7591	-1.76968	32.3754	-57.2942	0.157614	12.7591	35.1008	447.855	-2.00756	0.212799	0.0945102	55.587	34.5	6		75	4
ICGV 9555	Spanish	1	5	NaSARRI	2020A	R7	11	19	0.67	0.443603	47.2654	0.327499	52.6769	-3.65822	34.095	-124.727	0.240404	10.6376	37.1739	395.443	-1.7	0.291682	0.152674	47.6574	35.4	6		73	3
SGV 10005	Spanish	1	5	NaSARRI	2020A	R7	9	18	0.53	0.445121	38.8213	0.328631	51.9385	1.53406	33.2475	51.0038	-0.0326509	18.1232	35.1688	637.372	-2.89777	0.145823	0.0584689	59.9041	36.1	7		56	3
ICGV 01515	Spanish	1	5	NaSARRI	2020A	R7	8	20	0.61	0.454506	42.5915	0.31326	53.165	-1.10572	33.0445	-36.538	0.119812	14.1674	35.9038	508.662	-2.15826	0.227843	0.133385	41.4575	33.3	5		75	3
Serenut 4T	Spanish	1	5	NaSARRI	2020A	R7	5	13	0.69	0.489352	36.3456	0.223805	54.9916	0.839655	26.5664	22.3066	0.0119989	14.7388	30.1183	443.908	-2.67755	0.172979	0.0934432	45.98	37.1	6		0	1
ICGV 01510	Spanish	1	5	NaSARRI	2020A	R7	14	22	0.71	0.433709	50.5578	0.318712	51.7557	-5.34488	33.1759	-177.321	0.321091	7.71483	36.5061	281.638	-1.45079	0.332639	0.183819	44.7393	35.4	6		14	2
Serenut 9T	Virginia	1	5	NaSARRI	2020A	R7	7	15	0.8	0.395731	68.6152	0.348119	49.6429	-13.3417	34.9343	-466.083	0.582096	-3.37989	38.8759	-131.396	-0.797489	0.575846	0.42632	25.9663	34.8	3		14	2
ICGV-SM 96714	Valencia	1	5	NaSARRI	2020A	R7	9	15	0.51	0.432876	42.932	0.302984	50.6625	-1.39284	31.0129	-43.1959	0.143259	12.7039	33.5847	426.657	-2.06979	0.19251	0.0761792	60.4285	36.9	7		44	2
SGV 0065	Virginia	1	5	NaSARRI	2020A	R7	13	18	0.84	0.381139	78.6921	0.366675	49.547	-18.738	36.704	-687.76	0.699408	-10.3108	41.2431	-425.248	-0.569555	0.722232	0.50348	30.2884	32.9	5		0	1
SGV 0047	Virginia	1	5	NaSARRI	2020A	R7	10	15	0.84	0.397693	77.5663	0.361313	51.282	-18.513	37.3504	-691.468	0.686312	-9.77418	42.3007	-413.455	-0.594001	0.684429	0.510405	25.4262	33	2		50	2
ICGV-SM 03702	Virginia	2	1	NaSARRI	2020A	R7	11	16	0.7	0.447971	51.2841	0.292044	52.9586	-5.76746	31.9288	-184.148	0.349773	6.7603	35.8763	242.534	-1.38254	0.347764	0.198273	42.9862	33.1	5		9	2
Serenut 4T	Spanish	2	1	NaSARRI	2020A	R7	10	20	0.69	0.422154	53.5644	0.345097	51.1942	-6.82944	34.8494	-238.001	0.3669	6.0406	37.995	229.513	-1.30591	0.365834	0.189943	48.0796	34.1	6		10	2
ICGV-SM 99568	Spanish	2	1	NaSARRI	2020A	R7	9	23	0.72	0.467132	48.9763	0.280269	54.6529	-4.80557	31.745	-152.553	0.309214	8.26508	35.9536	297.16	-1.50648	0.288614	0.173065	40.0358	33.3	5		33	3
ICGV SM 03590	Spanish	2	1	NaSARRI	2020A	R7	9	14	0.82	0.43013	52.4922	0.285256	50.9613	-6.09606	30.4782	-185.797	0.377709	5.59462	34.175	191.196	-1.31065	0.373962	0.273511	26.8613	33.7	3		0	1
12CS-015	Spanish	2	1	NaSARRI	2020A	R7	9	15	0.61	0.465075	41.3337	0.279184	53.6724	-0.834165	30.6807	-25.5928	0.11282	13.7426	33.9495	466.555	-2.20174	0.184862	0.0803267	56.5476	32.7	4		89	3
ICGV-SM 16502	Spanish	2	1	NaSARRI	2020A	R7	10	21	0.63	0.468129	44.2779	0.310456	54.7926	-2.15931	33.7975	-72.9794	0.170973	13.0241	37.2009	484.509	-1.95518	0.228029	0.0988141	56.666	32.8	6		50	3
SGV 0805	Valencia	2	1	NaSARRI	2020A	R7	3	15	0.76	0.431934	45.1583	0.303813	50.7909	-2.58525	31.2804	-80.8678	0.205661	11.0361	34.0917	376.238	-1.8344	0.249574	0.144823	41.972	32.4	5		100	4
Serenut 9T	Virginia	2	1	NaSARRI	2020A	R7	8	17	0.81	0.400641	73.9542	0.334263	50.5372	-15.7173	34.8997	-548.529	0.647745	-6.65214	39.6053	-263.46	-0.676151	0.642329	0.486892	24.1989	32.1	4		0	1
ICGV-SM 08556	Spanish	2	1	NaSARRI	2020A	R7	14	28	0.73	0.418921	62.2682	0.363892	52.021	-11.1423	37.0386	-412.696	0.493783	0.540926	40.8513	22.0976	-0.977774	0.488873	0.261884	46.431	32.6	6		43	3
Serenut 11T	Virginia	2	1	NaSARRI	2020A	R7	6	14	0.82	0.403783	74.2974	0.357407	51.4848	-16.7731	37.0089	-620.756	0.648867	-7.46177	41.7704	-311.681	-0.663094	0.661358	0.500382	24.3403	33	4		83	4
ICGV 01502	Spanish	2	2	NaSARRI	2020A	R7	17	23	0.71	0.39856	62.0067	0.346473	49.2798	-10.3322	34.2551	-353.931	0.497165	0.631198	37.632	23.7532	-0.98059	0.47253	0.2677	43.3474	34.1	6		12	2
SGV 990400	Virginia	2	2	NaSARRI	2020A	R7	5	19	0.85	0.42524	55.5404	0.29113	50.7731	-7.35486	30.9845	-227.887	0.424758	3.93258	34.811	136.897	-1.18399	0.378603	0.257523	31.9808	34.4	4		20	2
SGV 0071	Virginia	2	2	NaSARRI	2020A	R7	7	17	0.82	0.433895	69.0687	0.306059	53.2479	-13.3946	34.1285	-457.137	0.593309	-3.51216	39.3537	-138.216	-0.794275	0.542783	0.39226	27.7317	34.5	5		29	2
ICGV 01510	Spanish	2	2	NaSARRI	2020A	R7	16	21	0.76	0.433482	56.2144	0.303237	51.9798	-7.88169	32.5169	-256.288	0.429082	3.79096	36.5407	138.524	-1.16539	0.38517	0.221125	42.5901	34.9	5		6	2
ICGV-SM 95355	Virginia	2	2	NaSARRI	2020A	R7	12	19	0.88	0.42022	70.3165	0.297907	51.6205	-13.4045	32.7456	-438.938	0.611005	-4.04828	37.7321	-152.75	-0.763991	0.550665	0.427253	22.4114	33.9	5		17	2
DOK 1R	Spanish	2	2	NaSARRI	2020A	R7	6	24	0.68	0.439631	45.7016	0.303846	51.7003	-2.91092	31.7974	-92.5598	0.219048	10.8331	34.8393	377.416	-1.78645	0.256597	0.117293	54.2892	34.7	6		0	1
ICGVS-SM 0205	Spanish	2	2	NaSARRI	2020A	R7	4	18	0.59	0.425645	43.6796	0.312078	50.0713	-1.70339	31.3917	-53.4722	0.158579	12.3122	33.8049	416.212	-2.00585	0.21606	0.0940384	56.4757	32.3	6		75	3
Serenut 8R	Virginia	2	2	NaSARRI	2020A	R7	3	14	0.8	0.44588	51.3174	0.28671	52.6365	-5.74779	31.3736	-180.329	0.354016	6.56239	35.3109	231.724	-1.37396	0.346749	0.24688	28.8014	33.3	4		67	2
SGV 10010 ER	Spanish	2	2	NaSARRI	2020A	R7	10	11	0.78	0.433762	56.1453	0.311296	52.1511	-7.93382	33.177	-263.22	0.424301	3.95405	37.1501	146.894	-1.17277	0.402857	0.24791	38.462	34.1	5		60	3
SGV 0060	Virginia	2	2	NaSARRI	2020A	R7	6	14	0.86	0.440144	60.1657	0.301802	53.042	-9.59559	33.1843	-318.423	0.484039	1.60991	37.7442	60.7648	-1.03285	0.438994	0.290013	33.9368	32.5	5		50	2
DOK 1T	Spanish	2	3	NaSARRI	2020A	R7	4	17	0.71	0.429809	44.6035	0.284702	50.2201	-2.43997	29.6079	-72.2425	0.208181	10.5786	32.4911	343.711	-1.8361	0.234898	0.123587	47.387	33.7	6		0	1
ICGV-SM 88710	Virginia	2	3	NaSARRI	2020A	R7	15	23	0.86	0.383359	84.2335	0.351694	50.2888	-21.4794	36.6507	-787.234	0.760336	-14.0036	41.9867	-587.967	-0.473467	0.769543	0.593918	22.822	30.9	5		20	2
SGV 0065	Virginia	2	3	NaSARRI	2020A	R7	7	15	0.84	0.393678	75.6039	0.387156	51.1238	-18.1419	38.7438	-702.889	0.66137	-8.88815	43.2169	-384.118	-0.627601	0.676824	0.454583	32.8359	32.8	5		43	2
RedBeauty	Valencia	2	3	NaSARRI	2020A	R7	11	30	0.67	0.420423	56.7572	0.342026	51.2539	-8.34856	34.8409	-290.871	0.423113	3.82714	38.318	146.649	-1.15932	0.385133	0.18556	51.8193	32.8	7		36	3
ICGV 9555	Spanish	2	3	NaSARRI	2020A	R7	14	27	0.77	0.391024	69.0173	0.401613	50.2309	-14.6917	38.6455	-567.768	0.577568	-4.16919	42.1357	-175.672	-0.781452	0.581363	0.327943	43.5906	32.7	6		29	3
ICGV-SM 95526	Valencia	2	3	NaSARRI	2020A	R7	15	35	0.77	0.386188	69.0806	0.430543	50.2418	-15.2424	40.3559	-615.119	0.573953	-4.47994	43.4664	-194.727	-0.776084	0.598359	0.315706	47.2381	33.3	6		13	2
ICGV 01504	Spanish	2	3	NaSARRI	2020A	R7	9	30	0.8	0.439826	61.9804	0.318109	53.4887	-10.6197	34.7008	-368.513	0.50171	0.664871	39.3416	26.1571	-0.983107	0.462308	0.258211	44.1474	33.7	6		22	2
SGV 0080	Virginia	2	3	NaSARRI	2020A	R7	14	18	0.84	0.383165	78.3945	0.342064	49.1753	-17.7587	34.9204	-620.141	0.698921	-9.48753	39.5655	-375.379	-0.580943	0.701436	0.514125	26.7039	34.2	5		29	3
ICGV-SM 01709	Virginia	2	3	NaSARRI	2020A	R7	12	18	0.83	0.407446	74.5017	0.309104	50.83	-15.3625	33.3867	-512.904	0.6578	-6.60797	38.411	-253.819	-0.669355	0.621519	0.453572	27.0221	34.7	5		33	3
SGV 0075	Virginia	2	3	NaSARRI	2020A	R7	10	29	0.86	0.411104	83.646	0.353789	53.6626	-22.4204	38.8086	-870.106	0.752717	-14.6568	45.0005	-659.563	-0.483763	0.759381	0.582189	23.3338	32	5		50	2
Serenut 5R	Virginia	2	4	NaSARRI	2020A	R7	6	16	0.79	0.424133	63.3874	0.290622	51.275	-10.394	31.6206	-328.664	0.529772	-0.177687	36.0943	-6.41348	-0.936806	0.480311	0.313808	34.6656	33.2	5		50	3
SGV 0084	Virginia	2	4	NaSARRI	2020A	R7	18	21	0.85	0.388925	80.4958	0.349301	50.3394	-19.3866	36.2282	-702.343	0.720187	-11.3016	41.283	-466.564	-0.540853	0.724933	0.524815	27.6051	32.1	5		6	2
ICGV-SM 96714	Valencia	2	4	NaSARRI	2020A	R7	13	28	0.74	0.412815	67.6047	0.350175	51.5927	-13.334	36.174	-482.346	0.567594	-2.88073	40.4805	-116.614	-0.825039	0.517119	0.299879	42.0097	32.9	6		54	4
ICGV 01515	Spanish	2	4	NaSARRI	2020A	R7	12	23	0.79	0.392549	72.4879	0.343813	49.6098	-15.0305	34.8771	-524.219	0.629787	-5.74757	39.1509	-225.023	-0.705979	0.606892	0.393391	35.1794	32.9	6		33	2
Acholi White	Valencia	2	4	NaSARRI	2020A	R7	13	32	0.75	0.396929	67.0422	0.354521	49.746	-12.7575	35.3119	-450.49	0.560736	-2.44186	39.087	-95.445	-0.83814	0.53072	0.308048	41.9566	32.9	5		38	3
ICGV 01514	Spanish	2	4	NaSARRI	2020A	R7	8	21	0.73	0.440319	55.4219	0.307407	52.7543	-7.65217	33.1769	-253.875	0.413692	4.41345	37.2629	164.458	-1.20168	0.366427	0.204773	44.1161	33.4	6		50	3
Serenut 14R	Virginia	2	4	NaSARRI	2020A	R7
ICGV-SM 95714	Valencia	2	4	NaSARRI	2020A	R7	10	26	0.82	0.404163	71.0371	0.364749	51.2785	-15.2253	37.1344	-565.383	0.608149	-5.27848	41.4915	-219.012	-0.737137	0.603152	0.364278	39.6042	33.4	5		60	4
ICGV-SM 01731	Virginia	2	4	NaSARRI	2020A	R7	13	26	0.86	0.370983	84.722	0.348394	48.7388	-21.0644	35.5489	-748.816	0.765948	-13.7531	40.5228	-557.316	-0.466201	0.781376	0.611316	21.7642	33.4	5		15	2
B7-30-9-3	Spanish	2	4	NaSARRI	2020A	R7	10	20	0.69	0.405139	64.7273	0.372596	50.8336	-12.2004	37.0004	-451.419	0.525903	-1.07717	40.6343	-43.77	-0.902735	0.512956	0.283566	44.7192	33.2	6		70	4
JL 24	Spanish	2	5	NaSARRI	2020A	R7	3	15	0.72	0.474731	51.4779	0.231242	54.8243	-5.82749	28.1115	-163.819	0.390824	5.37591	32.9117	176.93	-1.3067	0.305199	0.16892	44.6524	34.8	7		100	3
SGV 0047	Virginia	2	5	NaSARRI	2020A	R7	14	26	0.85	0.393625	82.9598	0.350959	51.3311	-21.1088	37.1336	-783.844	0.746385	-13.3653	42.6505	-570.037	-0.496094	0.776955	0.564363	27.3623	34.4	5		14	2
Serenut 6T	Spanish	2	5	NaSARRI	2020A	R7	7	15	0.7	0.393797	67.8926	0.316115	48.6857	-12.1695	32.2605	-392.593	0.579769	-2.61455	36.2239	-94.7094	-0.81854	0.498958	0.331076	33.6466	33.1	6		43	2
SGV 0023	Virginia	2	5	NaSARRI	2020A	R7	12	15	0.8	0.409416	69.5313	0.284253	49.9985	-12.4124	30.8737	-383.217	0.605717	-3.33813	35.5055	-118.522	-0.782242	0.532058	0.355767	33.1337	34.4	5		25	2
ICGV-SM 16501	Spanish	2	5	NaSARRI	2020A	R7	11	18	0.69	0.45082	62.0996	0.279692	53.9591	-10.1548	32.1207	-326.179	0.515524	0.494172	37.1953	18.3809	-0.973166	0.432403	0.230852	46.6117	33.9	6		36	3
ICGV-SM 16520	Spanish	2	5	NaSARRI	2020A	R7	11	25	0.78	0.409382	70.3256	0.357781	51.6656	-14.8047	36.8836	-546.05	0.599932	-4.73994	41.3475	-195.985	-0.756201	0.56406	0.339428	39.8241	33.4	6		45	3
SGV 10005	Spanish	2	5	NaSARRI	2020A	R7	10	16	0.68	0.423456	60.8917	0.29697	51.1132	-9.51785	31.8593	-303.232	0.496392	1.14445	36.0766	41.2879	-1.00804	0.418646	0.244713	41.5465	33.4	6		70	4
Serenut 7T	Virginia	2	5	NaSARRI	2020A	R7	5	12	0.85	0.408438	71.0001	0.317387	50.7481	-13.9875	33.673	-471.003	0.616003	-4.61033	38.3517	-176.814	-0.744765	0.569402	0.407549	28.4251	33.7	4		20	2
ICGV 02501	Spanish	2	5	NaSARRI	2020A	R7	13	33	0.81	0.401596	70.852	0.370346	51.0744	-15.2243	37.3625	-568.818	0.605533	-5.22281	41.5941	-217.238	-0.739724	0.59321	0.343031	42.1738	33	6		8	2
SGV 07010	Virginia	2	5	NaSARRI	2020A	R7	11	16	0.86	0.364721	86.4265	0.361797	48.5755	-22.4017	36.395	-815.31	0.78271	-15.2961	41.352	-632.522	-0.434636	0.834261	0.645279	22.6525	33.8	5		45	3
SGV 10010 ER	Spanish	1	1	NaSARRI	2020A	R7	8	12	0.71	0.427406	54.7467	0.280004	50.7517	-6.95591	30.1281	-209.568	0.417809	4.20601	33.9927	142.974	-1.20827	0.369109	0.235697	36.1443	35.5	6		25	2
Serenut 14R	Virginia	1	1	NaSARRI	2020A	R7		17
DOK 1T	Spanish	1	1	NaSARRI	2020A	R7	2	10	0.77	0.441208	46.9386	0.23628	50.9259	-3.7776	26.5289	-100.216	0.305215	7.49492	30.1934	226.297	-1.54813	0.264518	0.163769	38.0876	32.9	6		100	3
ICGV SM 03590	Spanish	1	1	NaSARRI	2020A	R7	3	12	0.84	0.444587	43.3399	0.252056	51.2399	-2.15034	27.6304	-59.4145	0.204696	10.3471	30.9355	320.092	-1.86593	0.218078	0.138545	36.47	31.5	4		0	1
ICGV 02501	Spanish	1	1	NaSARRI	2020A	R7	12	26	0.68	0.408805	61.9992	0.323594	50.0385	-10.1504	33.1806	-336.796	0.503052	0.604857	36.9795	22.3673	-0.978855	0.451888	0.258752	42.7399	33.8	6		8	2
SGV 0080	Virginia	1	1	NaSARRI	2020A	R7	11	21	0.78	0.409534	68.8461	0.311378	50.5228	-12.8638	33.0032	-424.547	0.591624	-3.2581	37.5176	-122.236	-0.796145	0.539831	0.364624	32.4559	33.8	4		0	1
JL 24	Spanish	1	1	NaSARRI	2020A	R7	5	21	0.61	0.425953	55.4836	0.291603	50.8549	-7.33616	31.0567	-227.837	0.423232	3.99093	34.8905	139.246	-1.18752	0.360883	0.209117	42.0541	35.6	6		60	3
Acholi White	Valencia	1	1	NaSARRI	2020A	R7	7	26	0.76	0.420836	58.4704	0.304483	50.7588	-8.64167	32.0783	-277.21	0.462209	2.45146	35.9848	88.2154	-1.08406	0.396401	0.225723	43.0569	32.5	5		43	2
ICGV-SM 16502	Spanish	1	1	NaSARRI	2020A	R7	10	23	0.62	0.418456	56.6886	0.294406	50.1585	-7.77838	30.9606	-240.823	0.441802	3.26819	34.7086	113.434	-1.13984	0.36937	0.197153	46.6246	33.3	7		0	1
SGV 0060	Virginia	1	1	NaSARRI	2020A	R7	11	17	0.84	0.40025	78.7462	0.328964	50.9684	-18.0265	35.1354	-633.366	0.702578	-9.74633	40.3781	-393.538	-0.579601	0.675383	0.499241	26.0803	34.9	4		0	1
SGV 0075	Virginia	1	2	NaSARRI	2020A	R7	15	30	0.85	0.378393	79.5426	0.352227	48.9879	-18.5765	35.5309	-660.04	0.710484	-10.4274	40.1269	-418.421	-0.556684	0.688449	0.498527	27.587	33.1	5		27	2
ICGV 01502	Spanish	1	2	NaSARRI	2020A	R7	14	27	0.77	0.398198	67.2739	0.325416	49.3282	-12.2127	33.1874	-405.308	0.569513	-2.35042	37.1753	-87.3774	-0.834652	0.537622	0.319404	40.5895	34.7	6		21	2
SGV 07010	Virginia	1	2	NaSARRI	2020A	R7	7	12	0.82	0.421979	62.456	0.276316	50.6696	-9.71756	30.2353	-293.814	0.523409	0.277621	34.6136	9.60946	-0.959114	0.440112	0.298432	32.1919	32.8	4		14	2
Serenut 5R	Virginia	1	2	NaSARRI	2020A	R7	4	12	0.73	0.395831	58.501	0.285037	47.5581	-8.00835	29.0669	-232.778	0.473187	2.1092	32.448	68.4392	-1.07079	0.410288	0.264859	35.4457	33.4	5		0	1
12CS-015	Spanish	1	2	NaSARRI	2020A	R7	11	18	0.7	0.415067	58.4071	0.327847	50.5264	-8.8202	33.5495	-295.913	0.45286	2.66522	37.1578	99.0337	-1.09383	0.411539	0.217536	47.1407	34.9	6		45	3
DOK 1R	Spanish	1	2	NaSARRI	2020A	R7	11	27	0.8	0.409708	70.0523	0.318589	50.8229	-13.6157	33.7406	-459.401	0.6045	-4.0657	38.3565	-155.946	-0.766677	0.553364	0.345979	37.4771	34.1	6		9	2
B7-30-9-3	Spanish	1	2	NaSARRI	2020A	R7	10	25	0.73	0.409846	64.9164	0.349538	50.9471	-11.94	35.5936	-424.99	0.53324	-1.12166	39.5383	-44.3485	-0.898144	0.497516	0.260736	47.5925	34.5	7		0	1
ICGV-SM 08556	Spanish	1	2	NaSARRI	2020A	R7	11	20	0.73	0.417516	65.1739	0.316549	51.2012	-11.5643	33.5075	-387.49	0.545421	-1.22538	37.8757	-46.412	-0.889012	0.478903	0.281837	41.1495	34.4	7		36	3
Serenut 7T	Virginia	1	2	NaSARRI	2020A	R7	5	20	0.76	0.450698	65.2859	0.280153	54.2273	-11.4309	32.4691	-371.15	0.553714	-1.20913	37.8238	-45.7338	-0.889634	0.478393	0.337047	29.5459	36.3	5		20	2
ICGV-SM 01709	Virginia	1	2	NaSARRI	2020A	R7	11	18	0.83	0.395331	76.3052	0.303723	49.4767	-15.6504	32.3999	-507.073	0.678912	-7.34942	37.25	-273.766	-0.633792	0.643847	0.471723	26.7337	34.7	5		18	2
ICGV-SM 95526	Valencia	1	3	NaSARRI	2020A	R7	14	41	0.75	0.374154	69.9896	0.388808	48.0341	-14.4094	36.5345	-526.442	0.59331	-4.49806	39.7328	-178.72	-0.756889	0.584297	0.332284	43.131	35.2	6		21	2
ICGV-SM 95355	Virginia	1	3	NaSARRI	2020A	R7	9	18	0.88	0.395252	83.3278	0.293532	50.0786	-18.7286	32.5677	-609.949	0.754493	-11.4705	38.1543	-437.649	-0.507337	0.694542	0.570699	17.8308	35	4		22	2
Serenut 6T	Spanish	1	3	NaSARRI	2020A	R7	7	33	0.84	0.417897	70.7422	0.313791	51.7453	-14.0081	33.9566	-475.668	0.613018	-4.50519	38.8889	-175.202	-0.751986	0.562545	0.387977	31.0319	35.1	6		100	4
ICGV-SM 16520	Spanish	1	3	NaSARRI	2020A	R7	8	30	0.76	0.383757	72.6995	0.384046	49.4434	-16.0266	37.2876	-597.594	0.626967	-6.44616	41.1159	-265.04	-0.693334	0.623723	0.390764	37.3497	35.7	6		25	2
ICGV 01504	Spanish	1	3	NaSARRI	2020A	R7	15	18	0.79	0.399474	68.5895	0.31951	49.4915	-12.7065	32.9692	-418.922	0.587306	-3.10043	37.1471	-115.172	-0.801179	0.537059	0.329901	38.5727	35.6	6		7	2
SGV 0805	Valencia	1	3	NaSARRI	2020A	R7	9	15	0.8	0.414848	54.6753	0.283675	49.3988	-6.80373	29.7099	-202.138	0.416048	4.17789	33.2487	138.91	-1.21136	0.353852	0.213021	39.7993	35.8	6		22	2
ICGV-SM 01731	Virginia	1	3	NaSARRI	2020A	R7	9	19	0.82	0.412127	68.7416	0.27663	50.0786	-11.9526	30.3192	-362.395	0.598664	-2.87605	34.9661	-100.564	-0.80042	0.525842	0.359514	31.6308	36.9	5		33	2
ICGV-SM 95714	Valencia	1	3	NaSARRI	2020A	R7	14	22	0.8	0.396655	72.1383	0.366393	50.5515	-15.6235	36.8615	-575.905	0.621614	-5.95071	41.1114	-244.642	-0.710762	0.625603	0.382358	38.8817	36.5	5		29	3
Serenut 11T	Virginia	1	3	NaSARRI	2020A	R7	9	13	0.85	0.40977	79.3131	0.278954	50.9294	-16.5626	31.6583	-524.344	0.713623	-8.79767	37.2307	-327.543	-0.583329	0.646914	0.513527	20.6189	35.5	5		33	2
Serenut 8R	Virginia	1	3	NaSARRI	2020A	R7	5	13	0.85	0.420124	53.0065	0.259064	49.4396	-6.02517	27.8885	-168.033	0.402431	4.6448	31.5237	146.421	-1.26147	0.343713	0.228903	33.4029	33.4	5		40	2
ICGV-SM 99568	Spanish	1	4	NaSARRI	2020A	R7	10	25	0.74	0.386253	72.0148	0.311167	48.1076	-13.6529	31.8509	-434.858	0.630182	-4.82243	36.0038	-173.626	-0.72159	0.555218	0.379207	31.7012	33.3	6		40	2
ICGV-SM 88710	Virginia	1	4	NaSARRI	2020A	R7	14	29	0.87	0.386922	88.9089	0.339814	51.1872	-23.9568	36.8463	-882.72	0.807623	-17.2489	42.916	-740.255	-0.403289	0.831719	0.667242	19.7756	34.1	5		29	2
SGV 0071	Virginia	1	4	NaSARRI	2020A	R7	12	29	0.87	0.393811	86.2961	0.33354	51.4185	-22.3135	36.3426	-810.93	0.781596	-15.1996	42.295	-642.866	-0.446118	0.790628	0.621087	21.4439	33.8	5		25	2
SGV 0084	Virginia	1	4	NaSARRI	2020A	R7	10	24	0.83	0.428607	75.2704	0.296997	53.1085	-15.942	33.8211	-539.175	0.667492	-7.20282	39.5579	-284.929	-0.656504	0.62085	0.457626	26.2904	34.9	5		70	3
ICGV 01514	Spanish	1	4	NaSARRI	2020A	R7	12	28	0.77	0.408663	70.9171	0.316842	50.7517	-13.935	33.6424	-468.807	0.614896	-4.54634	38.3176	-174.205	-0.747112	0.565843	0.370987	34.4363	32.4	6		42	3
RedBeauty	Valencia	1	4	NaSARRI	2020A	R7	12	32	0.79	0.402062	69.2791	0.331115	50.1113	-13.3978	34.1398	-457.397	0.593264	-3.67303	38.4133	-141.093	-0.783085	0.540644	0.327048	39.5077	32.7	6		92	4
ICGV-SM 03702	Virginia	1	4	NaSARRI	2020A	R7	13	19	0.83	0.395879	78.4161	0.309903	49.9401	-16.9517	33.2365	-563.416	0.7014	-8.86286	38.3224	-339.646	-0.590627	0.67662	0.493595	27.0499	35.1	5		31	3
SGV 0023	Virginia	1	4	NaSARRI	2020A	R7	7	16	0.8	0.361629	83.8538	0.34128	47.258	-19.8273	34.1234	-676.573	0.758036	-12.5043	38.6852	-483.733	-0.482489	0.763207	0.587164	23.0662	32.5	5		14	2
SGV 990400	Virginia	1	4	NaSARRI	2020A	R7	4	28	0.83	0.403037	77.4756	0.30828	50.6375	-16.6523	33.4332	-556.738	0.691088	-8.37737	38.6394	-323.697	-0.609413	0.622674	0.483944	22.2796	32.9	4		25	2
ICGV-SM 16501	Spanish	1	4	NaSARRI	2020A	R7	12	30	0.78	0.393035	75.1313	0.368157	50.5408	-17.2117	37.1662	-639.693	0.657723	-8.0635	41.6488	-335.835	-0.642552	0.669982	0.420159	37.288	34.4	7		33	2
ICGVS-SM 0205	Spanish	1	5	NaSARRI	2020A	R7	7	22	0.65	0.415508	62.8107	0.30182	50.4582	-10.1987	31.9514	-325.863	0.519058	0.161934	36.1046	5.84657	-0.954629	0.439954	0.259534	41.0089	34.2	6		86	4
ICGV 9555	Spanish	1	5	NaSARRI	2020A	R7	9	32	0.75	0.448302	60.8074	0.281542	53.6069	-9.64374	32.0047	-308.645	0.499139	1.17133	36.8997	43.2216	-1.00933	0.410473	0.237569	42.1231	31.6	6		67	3
SGV 10005	Spanish	1	5	NaSARRI	2020A	R7	6	28	0.71	0.436838	51.8411	0.284909	51.6483	-5.87546	30.7593	-180.725	0.365378	6.07263	34.5512	209.816	-1.34416	0.300454	0.172763	42.4994	33.3	6		100	4
ICGV 01515	Spanish	1	5	NaSARRI	2020A	R7	10	27	0.76	0.445686	62.3415	0.266226	53.1251	-9.89279	30.6933	-303.642	0.523867	0.323121	35.6799	11.5289	-0.962765	0.432056	0.292903	32.2072	33.1	6		50	3
Serenut 4T	Spanish	1	5	NaSARRI	2020A	R7	11	24	0.79	0.449545	70.1311	0.340893	55.9736	-15.3458	38.2499	-586.976	0.598796	-4.85705	43.9355	-213.397	-0.764742	0.575174	0.322988	43.8452	33.5	6		36	3
ICGV 01510	Spanish	1	5	NaSARRI	2020A	R7	13	37	0.78	0.39922	72.5514	0.339597	50.3177	-15.1351	35.0354	-530.264	0.630639	-5.81412	39.5276	-229.818	-0.705918	0.606186	0.383147	36.7937	33	6		46	2
Serenut 9T	Virginia	1	5	NaSARRI	2020A	R7	8	17	0.84	0.431988	81.9706	0.323636	55.0829	-20.7889	37.4044	-777.596	0.736194	-12.7944	44.0492	-563.584	-0.523045	0.760807	0.565648	25.6515	35.2	5		25	2
ICGV-SM 96714	Valencia	1	5	NaSARRI	2020A	R7	15	29	0.81	0.393531	75.7527	0.38495	51.0744	-18.1368	38.5901	-699.9	0.663011	-8.92465	43.0843	-384.513	-0.625548	0.671823	0.426144	36.5689	33.1	6		60	4
SGV 0065	Virginia	1	5	NaSARRI	2020A	R7	14	19	0.87	0.389979	84.6364	0.383425	52.0278	-23.5164	39.7572	-934.946	0.762877	-15.9058	45.3349	-721.085	-0.456761	0.828572	0.629033	24.0822	34	5		14	2
SGV 0047	Virginia	1	5	NaSARRI	2020A	R7	11	20	0.86	0.417424	81.7802	0.339085	53.7312	-20.8349	37.69	-785.268	0.733639	-12.8007	43.8467	-561.27	-0.521202	0.742565	0.54453	26.6691	33.7	5		9	2
ICGV-SM 03702	Virginia	2	1	NaSARRI	2020A	R7	11	19	0.86	0.388065	84.4147	0.350552	50.8691	-21.7416	36.9422	-803.181	0.762069	-14.2726	42.4627	-606.052	-0.470945	0.803624	0.605574	24.6447	33.6	5		91	4
Serenut 4T	Spanish	2	1	NaSARRI	2020A	R7	10	29	0.78	0.408312	71.6045	0.361858	51.7833	-15.5777	37.3045	-581.118	0.615332	-5.6957	41.864	-238.445	-0.724228	0.607314	0.346218	42.9919	34.2	7		60	3
ICGV-SM 99568	Spanish	2	1	NaSARRI	2020A	R7	7	31	0.72	0.414937	63.5294	0.273171	49.8926	-9.92689	29.6739	-294.569	0.53826	-0.255145	33.9663	-8.66632	-0.928728	0.449226	0.317593	29.3021	34.2	6		57	3
ICGV SM 03590	Spanish	2	1	NaSARRI	2020A	R7	6	23	0.89	0.370551	73.2997	0.331486	46.7983	-14.3926	32.5139	-467.958	0.642609	-5.68426	36.2601	-206.112	-0.688701	0.593545	0.474531	20.0513	33	4		17	2
12CS-015	Spanish	2	1	NaSARRI	2020A	R7	10	21	0.78	0.414539	69.0751	0.325656	51.4325	-13.4683	34.5106	-464.8	0.590798	-3.58851	39.137	-140.444	-0.790122	0.544274	0.320612	41.0936	35.1	6		100	5
ICGV-SM 16502	Spanish	2	1	NaSARRI	2020A	R7	15	28	0.74	0.401351	69.6514	0.325845	49.9547	-13.4143	33.7296	-452.459	0.5988	-3.82998	38.04	-145.693	-0.774668	0.545439	0.324429	40.5196	33.6	6		27	3
SGV 0805	Valencia	2	1	NaSARRI	2020A	R7	8	23	0.76	0.415246	60.5086	0.281512	49.856	-8.97596	30.0988	-270.165	0.497868	1.23771	34.1339	42.248	-1.01403	0.427129	0.261895	38.6847	35.7	5		13	2
Serenut 9T	Virginia	2	1	NaSARRI	2020A	R7	9	13	0.8	0.395747	84.0515	0.308654	50.6339	-19.8533	33.9827	-674.668	0.76057	-12.5654	39.6948	-498.782	-0.490599	0.770273	0.604362	21.5393	33.7	5		11	2
ICGV-SM 08556	Spanish	2	1	NaSARRI	2020A	R7	11	22	0.82	0.412487	68.0851	0.308807	50.7374	-12.5232	32.8883	-411.865	0.582752	-2.8053	37.42	-104.974	-0.81539	0.523225	0.345366	33.9928	31.1	6		18	2
Serenut 11T	Virginia	2	1	NaSARRI	2020A	R7	8	16	0.78	0.45643	54.5106	0.237386	53.1749	-6.81984	28.0576	-191.348	0.43592	3.80068	32.7031	124.294	-1.18732	0.36046	0.265247	26.4144	33.9	5		38	2
ICGV 01502	Spanish	2	2	NaSARRI	2020A	R7	15	27	0.82	0.395175	70.7817	0.328204	49.3914	-13.8235	33.607	-464.567	0.612157	-4.46463	37.8451	-168.965	-0.747649	0.581376	0.368708	36.5801	32.7	6		73	4
SGV 990400	Virginia	2	2	NaSARRI	2020A	R7	7	25	0.84	0.388804	80.4484	0.327203	49.7717	-18.4515	34.4449	-635.561	0.721811	-10.5492	39.523	-416.938	-0.54773	0.687942	0.544841	20.8013	31.2	4		29	2
SGV 0071	Virginia	2	2	NaSARRI	2020A	R7	13	14	0.86	0.383077	83.0937	0.347312	49.9583	-20.5841	36.0674	-742.416	0.748778	-12.9653	41.2554	-534.89	-0.494199	0.773123	0.575031	25.6224	33.4	6		23	2
ICGV 01510	Spanish	2	2	NaSARRI	2020A	R7	12	24	0.84	0.401377	69.0891	0.312118	49.6098	-12.7794	32.5666	-416.183	0.594633	-3.3228	36.8709	-122.515	-0.790123	0.531306	0.353729	33.4229	32.6	6		25	2
ICGV-SM 95355	Virginia	2	2	NaSARRI	2020A	R7	12	20	0.84	0.395512	87.6025	0.295291	50.7517	-21.1282	33.4344	-706.407	0.796515	-14.4337	39.5235	-570.471	-0.438338	0.745699	0.634457	14.9177	33	4		25	2
DOK 1R	Spanish	2	2	NaSARRI	2020A	R7	11	26	0.8	0.403902	65.1854	0.322981	49.7496	-11.3915	33.1478	-377.602	0.54421	-1.18353	37.1115	-43.9226	-0.888865	0.496581	0.27132	45.3625	32.4	6		18	2
ICGVS-SM 0205	Spanish	2	2	NaSARRI	2020A	R7	6	19	0.69	0.439402	49.6564	0.268866	51.4744	-4.90785	29.3806	-144.196	0.334832	6.97135	33.1111	230.829	-1.44004	0.29159	0.173909	40.3586	33.2	6		50	4
Serenut 8R	Virginia	2	2	NaSARRI	2020A	R7	6	12	0.73	0.447367	50.6978	0.231137	51.7972	-5.29182	26.7511	-141.562	0.380828	5.4341	30.8905	167.862	-1.3352	0.319556	0.226323	29.1755	32.5	4		17	2
SGV 10010 ER	Spanish	2	2	NaSARRI	2020A	R7	11	15	0.81	0.416113	60.4869	0.273491	49.801	-8.8569	29.4929	-261.216	0.500989	1.19364	33.5757	40.0773	-1.0116	0.44196	0.299392	32.2581	33.1	5		55	3
SGV 0060	Virginia	2	2	NaSARRI	2020A	R7	11	17	0.81	0.397756	76.6882	0.321439	50.2309	-16.5953	34.0536	-565.129	0.681343	-8.12381	39.0039	-316.86	-0.62085	0.651482	0.492665	24.3778	32.9	4		18	2
DOK 1T	Spanish	2	3	NaSARRI	2020A	R7	5	17	0.75	0.428665	45.2487	0.288865	50.2128	-2.72667	29.9382	-81.6316	0.221398	10.2761	32.8312	337.377	-1.78761	0.258397	0.137481	46.7948	33.7	6		40	4
ICGV-SM 88710	Virginia	2	3	NaSARRI	2020A	R7	9	13	0.78	0.391094	59.9507	0.289262	47.1984	-8.50507	29.2454	-248.734	0.490578	1.44688	32.5965	47.1631	-1.0278	0.444419	0.331581	25.3901	33	5		33	2
SGV 0065	Virginia	2	3	NaSARRI	2020A	R7	13	12	0.8	0.396961	73.0058	0.314422	49.547	-14.5296	32.9378	-478.572	0.640826	-5.64044	37.4935	-211.48	-0.699078	0.598575	0.415873	30.5228	34.9	5		8	2
RedBeauty	Valencia	2	3	NaSARRI	2020A	R7	13	33	0.76	0.408596	57.9044	0.338267	49.9255	-8.62075	33.8961	-292.21	0.442162	3.01567	37.2104	112.214	-1.11454	0.402488	0.203953	49.3269	33.7	6		54	4
ICGV 9555	Spanish	2	3	NaSARRI	2020A	R7	13	23	0.73	0.428051	53.5048	0.30454	51.152	-6.64742	32.0189	-212.843	0.385588	5.34924	35.6428	190.662	-1.27796	0.349281	0.200534	42.5865	34.7	6		15	2
ICGV-SM 95526	Valencia	2	3	NaSARRI	2020A	R7	15	34	0.73	0.41744	64.0841	0.331577	51.3871	-11.3659	34.5909	-393.157	0.526694	-0.585919	38.7695	-22.7158	-0.921402	0.482942	0.272003	43.678	35	6		20	2
ICGV 01504	Spanish	2	3	NaSARRI	2020A	R7	10	26	0.8	0.411205	62.8637	0.342778	50.7659	-10.8935	34.9253	-380.46	0.508066	0.149961	38.746	5.81038	-0.957064	0.48209	0.290561	39.7288	33.6	6		20	2
SGV 0080	Virginia	2	3	NaSARRI	2020A	R7	13	20	0.72	0.421593	61.098	0.285363	50.6946	-9.38066	30.8263	-289.171	0.50383	0.962479	35.0601	33.7446	-0.997862	0.436928	0.302288	30.8152	34.8	5		15	2
ICGV-SM 01709	Virginia	2	3	NaSARRI	2020A	R7	10	10	0.83	0.39786	64.834	0.297161	48.5069	-10.5607	30.7027	-324.24	0.547077	-0.875764	34.5811	-30.2849	-0.897097	0.492504	0.356234	27.6688	33.9	4		30	2
SGV 0075	Virginia	2	3	NaSARRI	2020A	R7	12	16	0.76	0.405921	76.9528	0.290537	50.4905	-15.7934	32.0668	-506.443	0.687405	-7.62273	37.3019	-284.342	-0.624483	0.598584	0.465354	22.2575	33.5	4		25	2
Serenut 5R	Virginia	2	4	NaSARRI	2020A	R7	6	12	0.67	0.428567	49.1116	0.279712	50.4042	-4.58986	29.608	-135.896	0.317625	7.43209	32.977	245.088	-1.48462	0.33222	0.213268	35.8053	34.7	5		67	3
SGV 0084	Virginia	2	4	NaSARRI	2020A	R7	14	13	0.71	0.431597	56.9322	0.29396	51.6552	-8.03974	31.7197	-255.018	0.443565	3.26244	35.8113	116.832	-1.13487	0.404095	0.25757	36.26	33.4	5		36	2
ICGV-SM 96714	Valencia	2	4	NaSARRI	2020A	R7	10	17	0.69	0.481097	42.6872	0.266972	55.3459	-1.73075	30.632	-53.0162	0.1637	12.5296	34.4926	432.177	-2.00419	0.213791	0.113931	46.709	34	6		90	3
ICGV 01515	Spanish	2	4	NaSARRI	2020A	R7	15	22	0.6	0.431537	47.2684	0.302465	50.9329	-3.68271	31.3868	-115.589	0.259649	9.4604	34.4463	325.876	-1.65115	0.28859	0.166055	42.4599	34	6		20	2
Acholi White	Valencia	2	4	NaSARRI	2020A	R7	8	20	0.64	0.413814	44.5046	0.319334	48.939	-2.07651	31.3349	-65.0671	0.178808	11.6091	33.5183	389.118	-1.92619	0.261281	0.143653	45.0199	38.1	6		100	4
ICGV 01514	Spanish	2	4	NaSARRI	2020A	R7	12	15	0.64	0.43298	43.7623	0.304292	50.7766	-1.83819	31.2212	-57.3904	0.166661	12.1269	33.8831	410.898	-1.97793	0.244219	0.133535	45.3216	33.4	6		25	3
Serenut 14R	Virginia	2	4	NaSARRI	2020A	R7
ICGV-SM 95714	Valencia	2	4	NaSARRI	2020A	R7	9	17	0.57	0.433503	44.9975	0.283266	50.641	-2.65984	29.7348	-79.0898	0.219187	10.3415	32.7527	338.712	-1.79804	0.248652	0.124383	49.977	34.6	6		44	2
ICGV-SM 01731	Virginia	2	4	NaSARRI	2020A	R7	7	14	0.79	0.41557	58.3599	0.306166	50.1838	-8.53381	31.8736	-272.003	0.460488	2.49574	35.6299	88.9229	-1.08764	0.419209	0.289878	30.8511	34.4	4		29	2
B7-30-9-3	Spanish	2	4	NaSARRI	2020A	R7	10	16	0.65	0.414372	51.8338	0.314517	49.6245	-5.77469	31.7972	-183.619	0.351276	6.4104	34.8506	223.406	-1.36755	0.335793	0.189912	43.4437	34.8	6		60	3
JL 24	Spanish	2	5	NaSARRI	2020A	R7	9	14	0.69	0.434512	43.6196	0.315269	51.0956	-1.65133	32.1543	-53.0972	0.152351	12.7818	34.7091	443.645	-2.02775	0.244974	0.126644	48.3028	32.3	5		33	5
SGV 0047	Virginia	2	5	NaSARRI	2020A	R7	7	12	0.74	0.448157	41.9442	0.294267	52.1169	-0.961926	31.0736	-29.8905	0.118777	13.534	33.9278	459.177	-2.17174	0.229361	0.146764	36.0118	32.8	5		29	2
Serenut 6T	Spanish	2	5	NaSARRI	2020A	R7	8	18	0.79	0.434986	44.0363	0.319209	51.2539	-1.85791	32.5558	-60.4859	0.161402	12.6344	35.1282	443.825	-1.99043	0.255751	0.135587	46.9849	33.3	6		63	4
SGV 0023	Virginia	2	5	NaSARRI	2020A	R7	12	11	0.62	0.460795	43.6069	0.288567	53.5774	-1.96383	31.4835	-61.8283	0.172079	12.3307	34.8635	429.892	-1.96298	0.255952	0.146391	42.8053	34.9	4		33	3
ICGV-SM 16501	Spanish	2	5	NaSARRI	2020A	R7	10	12	0.58	0.474853	41.8147	0.282627	54.8306	-1.06779	31.5327	-33.6704	0.123081	13.8369	35.0296	484.7	-2.15686	0.192981	0.0996307	48.3728	33.8	6		60	3
ICGV-SM 16520	Spanish	2	5	NaSARRI	2020A	R7	11	17	0.5	0.440167	42.9172	0.311671	51.5927	-1.29403	32.1114	-41.553	0.133353	13.36	34.7353	464.066	-2.10479	0.210258	0.110052	47.6585	34.6	6		55	3
SGV 10005	Spanish	2	5	NaSARRI	2020A	R7	9	9	0.43	0.438195	34.7694	0.292798	50.2707	3.29672	29.5589	97.4476	-0.168491	19.2006	31.2642	600.292	-3.78648	0.0944556	0.0457938	51.5182	34.8	6		100	4
Serenut 7T	Virginia	2	5	NaSARRI	2020A	R7	5	12	0.73	0.426418	48.0065	0.287953	50.202	-4.05508	30.0344	-121.792	0.288125	8.35325	33.1823	277.18	-1.56938	0.29834	0.201244	32.5454	33.2	4		20	2
ICGV 02501	Spanish	2	5	NaSARRI	2020A	R7	13	22	0.73	0.409646	62.5171	0.321751	50.1476	-10.3507	33.1442	-343.065	0.510202	0.315541	37.0229	11.6822	-0.963696	0.460796	0.287433	37.6225	34.1	5		23	2
SGV 07010	Virginia	2	5	NaSARRI	2020A	R7	12	14	0.7	0.431141	61.9646	0.285846	51.8558	-9.87226	31.494	-310.917	0.513251	0.558908	36.0408	20.1435	-0.975819	0.453689	0.300484	33.7686	33.9	5		0	1
SGV 10010 ER	Spanish	1	1	Nakabango	2020A	R7	10	13.3	0.58	0.336487	20.4441	0.349058	38.1268	14.146	25.9602	367.233	-2.0518	32.22	22.7521	733.073	6.37376	0.0920365	0.0634965	31.0095		5		0	1
Serenut 14R	Virginia	1	1	Nakabango	2020A	R7	6	15.3	0.77	0.335242	21.1226	0.35495	38.0997	13.8677	26.2922	364.611	-1.91705	31.9151	23.051	735.673	6.86234	0.0758333	0.0453817	40.156		3		0	1
DOK 1T	Spanish	1	1	Nakabango	2020A	R7	8	15	0.71	0.343653	20.0033	0.347138	38.8646	14.7091	26.2251	385.747	-2.19064	33.3826	23.0454	769.315	5.93629	0.0931138	0.0789366	15.2256		6		0	1
ICGV SM 03590	Spanish	1	1	Nakabango	2020A	R7	5	14.3	0.78	0.33453	40.2524	0.423914	40.7163	1.71139	32.4773	55.5812	-0.0447892	16.3838	30.9073	506.38	-2.982	0.294761	0.165135	43.9765		3		0	1
ICGV 02501	Spanish	1	1	Nakabango	2020A	R7	8	22.3	0.72	0.340952	28.4901	0.329225	39.2575	7.36829	25.8227	190.269	-0.654689	22.1678	24.4049	541.003	-14.0783	0.208126	0.157928	24.1191		6		13	2
SGV 0080	Virginia	1	1	Nakabango	2020A	R7	6	15.1	0.73	0.335395	33.1335	0.361299	39.3923	5.13079	27.9632	143.473	-0.346653	19.6677	26.5283	521.751	-5.74965	0.234121	0.152497	34.864		4		0	1
JL 24	Spanish	1	1	Nakabango	2020A	R7	5	13.3	0.77	0.341727	31.9061	0.349849	39.8796	5.73641	27.5254	157.897	-0.415675	20.4955	26.2286	537.567	-6.79093	0.244847	0.182869	25.313		3		20	2
Acholi White	Valencia	1	1	Nakabango	2020A	R7	6	17.8	0.78	0.336438	25.0889	0.327201	38.4018	9.52834	25.0807	238.978	-1.03047	24.9292	23.1397	576.855	59.6176	0.186299	0.168487	9.56103		5		33	2
ICGV-SM 16502	Spanish	1	1	Nakabango	2020A	R7	13	22.7	0.69	0.334417	28.4615	0.37322	38.9121	8.79366	28.0942	247.051	-0.767827	25.0631	25.7072	644.301	-30.2719	0.178759	0.110663	38.0941		7		8	2
SGV 0060	Virginia	1	1	Nakabango	2020A	R7	7	18	0.83	0.341799	23.8519	0.312335	38.7589	9.91706	24.3278	241.261	-1.15725	25.2894	22.569	570.756	27.2369	0.194868	0.170163	12.678		5		14	2
SGV 0075	Virginia	1	2	Nakabango	2020A	R7	12	19.3	0.81	0.356755	16.7392	0.291956	39.5677	14.6657	23.1349	339.29	-2.88637	32.193	20.8175	670.177	5.01282	0.0466917	0.0306258	34.4084		3		17	2
ICGV 01502	Spanish	1	2	Nakabango	2020A	R7	11	25.2	0.6	0.342705	23.4446	0.337648	39.0277	11.3793	25.9193	294.945	-1.33582	28.1816	23.5742	664.359	14.07	0.130733	0.0898172	31.2975		5		55	3
SGV 07010	Virginia	1	2	Nakabango	2020A	R7	4	10.1	0.79	0.339228	23.3936	0.353277	38.7589	12.0428	26.6755	321.247	-1.41278	29.4249	23.9251	703.993	11.6338	0.105755	0.0562712	46.7908		3		0	1
Serenut 5R	Virginia	1	2	Nakabango	2020A	R7	5	14.9	0.73	0.340506	26.686	0.362582	39.325	9.87135	27.6869	273.307	-0.942983	26.6316	25.3116	674.088	159.219	0.155019	0.101307	34.6488		4		0	1
12CS-015	Spanish	1	2	Nakabango	2020A	R7	9	16	0.65	0.35473	27.5183	0.329636	40.7113	8.33129	26.569	221.354	-0.762182	24.1698	25.2001	609.081	-23.8246	0.194818	0.127251	34.6819		6		67	4
DOK 1R	Spanish	1	2	Nakabango	2020A	R7	6	14.5	0.65	0.360652	17.6855	0.266365	39.9051	12.4616	21.7807	271.422	-2.22143	28.2965	20.234	572.551	6.72991	0.0961573	0.0709138	26.2522		5		0	1
B7-30-9-3	Spanish	1	2	Nakabango	2020A	R7	8	18.1	0.7	0.328574	23.9601	0.321894	37.3628	9.92456	24.162	239.797	-1.1714	24.9428	22.0558	550.133	24.3769	0.193894	0.159	17.9965		5		50	3
ICGV-SM 08556	Spanish	1	2	Nakabango	2020A	R7	12	19.9	0.66	0.337049	31.611	0.329454	39.1219	5.26592	25.9451	136.625	-0.393549	19.093	24.8914	475.25	-6.32267	0.246462	0.20845	15.4228		6		17	2
Serenut 7T	Virginia	1	2	Nakabango	2020A	R7	6	13.1	0.83	0.353281	28.9498	0.363124	41.0158	8.46345	28.7869	243.636	-0.700024	25.2621	26.9547	680.934	-19.0213	0.159098	0.0913866	42.5595		4		0	1
ICGV-SM 01709	Virginia	1	2	Nakabango	2020A	R7	5	11	0.78	0.356057	14.7811	0.27862	39.2106	15.3559	22.0294	338.281	-3.74167	32.6924	19.6761	643.26	4.27491	0.0210883	0.0140563	33.3454		4		0	1
ICGV-SM 95526	Valencia	1	3	Nakabango	2020A	R7	10	23.6	0.78	0.352527	25.1882	0.355551	40.4584	11.0821	27.8427	308.557	-1.13534	28.7887	25.5173	734.609	23.4679	0.139575	0.0882617	36.7641		6		30	2
ICGV-SM 95355	Virginia	1	3	Nakabango	2020A	R7	5	14	0.78	0.354185	26.6137	0.340923	40.6619	9.41689	27.1643	255.803	-0.897926	26.0297	25.4177	661.617	-130.013	0.1624	0.106495	34.4243		4		20	2
Serenut 6T	Spanish	1	3	Nakabango	2020A	R7	6	23.8	0.65	0.343974	22.5583	0.346021	39.148	12.5166	26.419	330.675	-1.54559	30.1423	23.7467	715.78	9.80239	0.120821	0.0879056	27.243		4		83	4
ICGV-SM 16520	Spanish	1	3	Nakabango	2020A	R7	13	17.5	0.55	0.315497	24.7384	0.343691	36.1301	9.93076	24.7423	245.71	-1.12965	24.9014	22.1394	551.303	26.1298	0.143487	0.0861924	39.9303		6		77	4
ICGV 01504	Spanish	1	3	Nakabango	2020A	R7	10	21.6	0.56	0.332989	22.6336	0.364758	38.0834	12.9758	26.905	349.114	-1.60434	30.7775	23.6887	729.078	8.78112	0.103539	0.0594266	42.6046		6			4
SGV 0805	Valencia	1	3	Nakabango	2020A	R7	8	15.5	0.64	0.336303	24.7394	0.353669	38.573	10.9077	26.6577	290.774	-1.18301	27.6471	24.0971	666.215	19.8991	0.126193	0.0648167	48.6369		5		63	3
ICGV-SM 01731	Virginia	1	3	Nakabango	2020A	R7	6	12.4	0.77	0.346232	29.1954	0.346561	40.0823	7.57224	27.3124	206.816	-0.633769	23.1878	25.7473	597.022	-13.4668	0.207184	0.142579	31.1821		4		0	1
ICGV-SM 95714	Valencia	1	3	Nakabango	2020A	R7	14	17.8	0.72	0.336697	37.2932	0.314854	39.4647	1.65705	25.5944	42.4112	-0.0526963	13.8061	25.4427	351.265	-3.02683	0.342948	0.298203	13.0474		5		43	3
Serenut 11T	Virginia	1	3	Nakabango	2020A	R7	8	15.2	0.79	0.350626	18.0431	0.360215	39.5523	17.4968	27.289	477.471	-3.05716	38.3728	23.4305	899.095	4.36107	0.041701	0.0249255	40.2281		3		0	1
Serenut 8R	Virginia	1	3	Nakabango	2020A	R7	4	14.5	0.83	0.34476	19.1292	0.36546	39.0539	16.5257	27.3618	452.175	-2.62346	36.7301	23.5487	864.946	4.86635	0.0616638	0.0430517	30.1832		4		0	1
ICGV-SM 99568	Spanish	1	4	Nakabango	2020A	R7	5	27.5	0.75	0.366669	25.0165	0.348277	41.9528	11.3004	28.2469	319.203	-1.14791	29.607	26.2226	776.374	22.9949	0.15057	0.102254	32.0886		6		40	2
ICGV-SM 88710	Virginia	1	4	Nakabango	2020A	R7	5	16.5	0.7	0.336603	27.4143	0.377767	39.0958	9.7825	28.4109	277.93	-0.894875	26.7111	25.7868	688.795	-680.227	0.181991	0.119713	34.2204		3		20	2
SGV 0071	Virginia	1	4	Nakabango	2020A	R7	12	16.2	0.83	0.341777	29.5083	0.389464	40.0217	8.71027	29.7331	258.983	-0.700208	25.7656	27.2709	702.653	-20.7706	0.195829	0.126379	35.4647		4		8	2
SGV 0084	Virginia	1	4	Nakabango	2020A	R7	8	12.4	0.79	0.334754	31.3393	0.398065	39.4956	7.43345	29.9369	222.534	-0.547447	23.7948	27.5078	654.543	-10.6732	0.206186	0.114345	44.5431		5		25	2
ICGV 01514	Spanish	1	4	Nakabango	2020A	R7	14	22.1	0.74	0.340573	25.702	0.354957	39.1637	10.3189	27.1083	279.727	-1.04769	27.0579	24.7373	669.339	38.4644	0.19466	0.160328	17.6369		6		14	2
RedBeauty	Valencia	1	4	Nakabango	2020A	R7	10	19.2	0.56	0.332127	33.1083	0.391284	39.3094	5.8937	29.5406	174.103	-0.397105	21.3229	27.487	586.103	-6.67349	0.238508	0.162734	31.7699		6		70	4
ICGV-SM 03702	Virginia	1	4	Nakabango	2020A	R7	5	12.9	0.78	0.335706	26.3773	0.391812	39.012	11.1587	29.103	324.751	-1.07248	29.0383	25.9597	753.826	25.978	0.155983	0.0962438	38.2987		3		0	1
SGV 0023	Virginia	1	4	Nakabango	2020A	R7	10	12.2	0.82	0.353011	32.8254	0.363288	41.3942	5.66596	29.2044	165.471	-0.380298	21.2715	27.976	595.091	-6.26223	0.244468	0.161194	34.0632		5		0	1
SGV 990400	Virginia	1	4	Nakabango	2020A	R7	7	25.6	0.83	0.33593	30.01	0.333456	38.8752	6.39401	25.9486	165.916	-0.524847	20.7037	24.5914	509.133	-9.06268	0.221103	0.147237	33.4079		5		0	1
ICGV-SM 16501	Spanish	1	4	Nakabango	2020A	R7	11	15.5	0.68	0.35543	35.1842	0.384394	42.1553	4.59007	31.0051	142.316	-0.261905	20.4293	29.7771	608.326	-4.75523	0.260724	0.161085	38.2165		6		36	2
ICGVS-SM 0205	Spanish	1	5	Nakabango	2020A	R7	7	13.3	0.59	0.372082	25.6765	0.396927	43.0977	13.0563	31.8749	416.169	-1.21667	33.9953	28.8815	981.833	15.0411	0.113973	0.0558515	50.9959		6		100	5
ICGV 9555	Spanish	1	5	Nakabango	2020A	R7	10	21.5	0.69	0.370736	25.5016	0.386618	42.8237	12.7397	31.0719	395.848	-1.21453	33.1307	28.2826	937.022	15.6998	0.145982	0.0933491	36.0542		6		30	2
SGV 10005	Spanish	1	5	Nakabango	2020A	R7	7	18.3	0.55	0.381224	17.0405	0.282853	42.1741	14.6761	23.8109	349.451	-2.69885	33.0698	21.9935	727.322	5.36541	0.0446657	0.0300624	32.6946		6		14	2
ICGV 01515	Spanish	1	5	Nakabango	2020A	R7	13	19	0.63	0.339001	25.245	0.367802	39.0487	11.186	27.7474	310.383	-1.16005	28.5907	24.9896	714.472	20.2146	0.134755	0.0646513	52.0231		6		38	3
Serenut 4T	Spanish	1	5	Nakabango	2020A	R7	9	18	0.47	0.33236	24.1223	0.366037	38.1702	11.8016	27.0915	319.723	-1.32616	29.0748	24.1031	700.793	13.1377	0.125415	0.0758028	39.5583		7		100	5
ICGV 01510	Spanish	1	5	Nakabango	2020A	R7	13	17.5	0.6	0.33547	24.9853	0.361051	38.5677	11.0146	27.0808	298.284	-1.17362	27.9679	24.3864	682.036	19.893	0.165483	0.111031	32.9045		7		46	3
Serenut 9T	Virginia	1	5	Nakabango	2020A	R7	8	15.4	0.82	0.335631	25.768	0.383151	38.8594	11.2996	28.5027	322.069	-1.13163	28.9987	25.4516	738.065	20.9847	0.174541	0.120385	31.0278		4		0	1
ICGV-SM 96714	Valencia	1	5	Nakabango	2020A	R7	10	22.8	0.64	0.343289	21.2732	0.370536	39.148	14.8107	27.7927	411.627	-1.97549	34.2315	24.2695	830.783	6.41613	0.101033	0.064547	36.1132		5		20	2
SGV 0065	Virginia	1	5	Nakabango	2020A	R7	7	12.3	0.8	0.341848	30.0198	0.364531	39.844	7.48964	28.2461	211.553	-0.596571	23.3575	26.3906	616.418	-12.0869	0.192049	0.116741	39.213		4		0	1
SGV 0047	Virginia	1	5	Nakabango	2020A	R7	9	11.6	0.78	0.355704	17.9976	0.341304	39.9507	16.5857	26.3827	437.575	-2.88705	36.6614	23.0668	845.661	4.66296	0.0630552	0.0380877	39.5962		4		0	1
ICGV-SM 03702	Virginia	2	1	Nakabango	2020A	R7	2	14.3	0.85	0.344572	19.2107	0.341693	38.8435	15.1221	25.8595	391.05	-2.40633	33.8719	22.6737	768.003	5.4466	0.0746734	0.0447	40.1393		4		0	1
Serenut 4T	Spanish	2	1	Nakabango	2020A	R7	10	20.8	0.37	0.343305	24.4861	0.332861	39.1585	10.3827	25.7703	267.565	-1.14509	26.641	23.7078	631.6	25.5277	0.141656	0.0915367	35.381		7		80	4
ICGV-SM 99568	Spanish	2	1	Nakabango	2020A	R7	10	12.1	0.62	0.333863	18.4896	0.344615	37.607	15.4906	25.3159	392.157	-2.67716	33.9055	21.8288	740.116	4.94139	0.060453	0.0293756	51.4075		5		30	3
ICGV SM 03590	Spanish	2	1	Nakabango	2020A	R7	3	16.3	0.84	0.340257	24.2016	0.33954	38.8435	10.8281	25.9631	281.131	-1.21823	27.3211	23.6709	646.717	18.8635	0.181992	0.148136	18.6032		3		33	2
12CS-015	Spanish	2	1	Nakabango	2020A	R7	9	20.5	0.75	0.3522	14.8683	0.282348	38.8277	15.3912	22.0909	340.005	-3.73813	32.6867	19.6309	641.668	4.25668	0.0282348	0.0173517	38.545		7		22	2
ICGV-SM 16502	Spanish	2	1	Nakabango	2020A	R7	11	15.8	0.6	0.319621	26.8021	0.377838	37.0938	9.79608	27.2195	266.645	-0.954879	25.8376	24.2756	627.223	87.3998	0.158345	0.0957337	39.541		7		45	3
SGV 0805	Valencia	2	1	Nakabango	2020A	R7	6	17.1	0.63	0.360195	24.6537	0.33314	41.0597	10.7294	26.8183	287.743	-1.13868	27.9802	24.9857	699.104	26.0546	0.13919	0.0901682	35.2193		5		50	3
Serenut 9T	Virginia	2	1	Nakabango	2020A	R7	9	23	0.8	0.35007	20.9697	0.357954	39.7675	14.6674	27.401	401.902	-1.99038	34.0116	24.2018	823.14	6.49425	0.102209	0.0620377	39.3029		3		0	1
ICGV-SM 08556	Spanish	2	1	Nakabango	2020A	R7	11	20.5	0.7	0.346102	29.2336	0.370759	40.2986	8.3873	28.8195	241.717	-0.689366	25.0096	26.7684	669.467	-18.4059	0.191743	0.109059	43.1226		7		0	1
Serenut 11T	Virginia	2	1	Nakabango	2020A	R7	4	13.1	0.84	0.349404	24.194	0.348308	39.9457	11.4722	27.0768	310.631	-1.26136	28.9788	24.7028	715.856	16.0809	0.131606	0.082457	37.3455		3		0	1
ICGV 01502	Spanish	2	2	Nakabango	2020A	R7	10	17.1	0.43	0.339803	24.0008	0.361508	38.9594	11.9408	27.2882	325.843	-1.33853	29.5507	24.4627	722.889	12.9682	0.14284	0.0964129	32.5029		6		80	4
SGV 990400	Virginia	2	2	Nakabango	2020A	R7	5	22.2	0.84	0.339183	21.3382	0.332045	38.3804	12.658	25.1473	318.314	-1.72848	29.6763	22.5276	668.536	8.32759	0.117777	0.0798663	32.1887		3		20	2
SGV 0071	Virginia	2	2	Nakabango	2020A	R7	6	12.8	0.8	0.355721	42.6756	0.302125	41.9622	-1.16662	26.4556	-30.8637	0.151394	10.4057	27.3978	285.094	-2.04554	0.374967	0.301701	19.5392		4		33	2
ICGV 01510	Spanish	2	2	Nakabango	2020A	R7	15	20.1	0.59	0.34539	23.1068	0.342702	39.3353	11.9729	26.3643	315.657	-1.42585	29.3308	23.8762	700.308	11.7199	0.126647	0.0904594	28.5736		7		27	2
ICGV-SM 95355	Virginia	2	2	Nakabango	2020A	R7	5	16.6	0.85	0.359873	19.3028	0.330912	40.4534	14.9919	26.0602	390.69	-2.31878	34.1442	23.3077	795.823	5.73905	0.0600193	0.0329889	45.0361		4		20	2
DOK 1R	Spanish	2	2	Nakabango	2020A	R7	8	16.5	0.62	0.332947	25.1505	0.33376	38.0671	9.66132	25.2705	244.147	-1.04295	25.1303	23.1623	582.075	48.8564	0.183733	0.152779	16.8472		6		0	1
ICGVS-SM 0205	Spanish	2	2	Nakabango	2020A	R7	6	23.5	0.6	0.359441	22.4861	0.329495	40.7212	12.2464	26.3142	322.253	-1.49277	30.0404	24.1733	726.177	10.9334	0.15026	0.0984644	34.4706		6		50	3
Serenut 8R	Virginia	2	2	Nakabango	2020A	R7	4	11.8	0.8	0.352612	25.2583	0.326253	40.2133	9.79967	25.9841	254.636	-1.02414	26.0623	24.2943	633.165	64.2638	0.181594	0.118614	34.6818		3		25	2
SGV 10010 ER	Spanish	2	2	Nakabango	2020A	R7	9	19.6	0.66	0.334944	23.2136	0.352659	38.2566	12.0193	26.3457	316.657	-1.43795	29.1433	23.5332	685.836	11.2094	0.121162	0.074681	38.3625		6		22	2
SGV 0060	Virginia	2	2	Nakabango	2020A	R7	7	15.3	0.82	0.349558	25.329	0.324943	39.8746	9.58789	25.7414	246.806	-1.0013	25.5786	24.0545	615.279	92.7995	0.145498	0.0815578	43.9458		6		0	1
DOK 1T	Spanish	2	3	Nakabango	2020A	R7	4	12.8	0.68	0.357153	19.49	0.315267	40.047	13.8535	24.9294	345.359	-2.12878	31.8079	22.5566	717.479	6.46738	0.10343	0.0624676	39.6038		4		0	1
ICGV-SM 88710	Virginia	2	3	Nakabango	2020A	R7	8	15.5	0.75	0.339301	19.7577	0.341022	38.3105	14.409	25.5494	368.141	-2.209	32.5078	22.4401	729.477	5.94944	0.0796425	0.0426994	46.3861		5		50	3
SGV 0065	Virginia	2	3	Nakabango	2020A	R7	8	15.8	0.77	0.348603	22.154	0.327039	39.4698	12.0602	25.4708	307.182	-1.535	29.1407	23.2088	676.322	10.4117	0.10826	0.0582985	46.1496		5		13	2
RedBeauty	Valencia	2	3	Nakabango	2020A	R7	13	16.5	0.53	0.349458	16.5283	0.251429	38.4929	12.0271	20.1888	242.812	-2.4072	26.659	18.6592	497.436	6.33133	0.0487088	0.0314386	35.4562		7		92	5
ICGV 9555	Spanish	2	3	Nakabango	2020A	R7	12	19	0.55	0.343889	18.7983	0.332796	38.6528	14.9553	25.2046	376.943	-2.48108	33.2981	22.1565	737.77	5.36945	0.0661813	0.037593	43.197		7		42	3
ICGV-SM 95526	Valencia	2	3	Nakabango	2020A	R7	12	27	0.71	0.348941	16.8769	0.276343	38.6209	13.3177	21.7499	289.659	-2.61186	29.3175	19.7374	578.65	5.60073	0.0567926	0.0331339	41.6581		5		17	2
ICGV 01504	Spanish	2	3	Nakabango	2020A	R7	12	25	0.64	0.337558	20.7029	0.363128	38.3857	14.7213	26.9125	396.186	-2.08037	33.5514	23.4104	785.451	6.12206	0.0872201	0.046127	47.1142		6		17	2
SGV 0080	Virginia	2	3	Nakabango	2020A	R7	11	15.8	0.8	0.341331	26.3522	0.350687	39.2782	9.68041	26.9556	260.941	-0.949965	26.0593	24.7927	646.079	187.03	0.199018	0.144446	27.4206		4		9	2
ICGV-SM 01709	Virginia	2	3	Nakabango	2020A	R7	6	13	0.8	0.336611	16.3089	0.344243	37.7007	17.5098	25.2614	442.323	-3.773	37.0558	21.3765	792.123	3.91245	0.0410498	0.0261032	36.411		5		0	1
SGV 0075	Virginia	2	3	Nakabango	2020A	R7	9	11.8	0.81	0.343511	32.0866	0.335582	39.966	5.21791	26.7753	139.711	-0.373971	19.4745	25.7897	502.24	-6.05097	0.281375	0.22567	19.7975		4		11	2
Serenut 5R	Virginia	2	4	Nakabango	2020A	R7	5	10.1	0.68	0.360066	15.1718	0.291186	39.7675	16.0479	23.0962	370.645	-3.73937	34.367	20.5381	705.834	4.20184	0.0208696	0.0130249	37.5891		4		0	1
SGV 0084	Virginia	2	4	Nakabango	2020A	R7	7	11.2	0.72	0.334733	18.7372	0.346969	37.7448	15.4602	25.5534	395.06	-2.60701	33.9906	22.053	749.595	5.03255	0.0944924	0.0719746	23.8304		5		14	2
ICGV-SM 96714	Valencia	2	4	Nakabango	2020A	R7	8	16.3	0.6	0.330905	23.4021	0.32421	37.5904	10.4796	24.3781	255.473	-1.27256	25.9038	22.1714	574.324	17.2283	0.128037	0.0793092	38.0576		6		88	4
ICGV 01515	Spanish	2	4	Nakabango	2020A	R7	10	16	0.58	0.341164	21.0217	0.332428	38.573	12.9683	25.2554	327.519	-1.80149	30.2388	22.5988	683.36	7.80692	0.0982113	0.0619944	36.8765		7		80	4
Acholi White	Valencia	2	4	Nakabango	2020A	R7	6	14.1	0.57	0.335923	19.004	0.348121	37.9146	15.3096	25.7201	393.764	-2.50816	33.8687	22.2596	753.905	5.19631	0.0739281	0.0398111	46.1489		5		67	3
ICGV 01514	Spanish	2	4	Nakabango	2020A	R7	12	18.8	0.65	0.356976	25.3311	0.338696	40.8197	10.3665	27.0459	280.373	-1.0596	27.4636	25.1708	691.279	39.939	0.180788	0.130042	28.0695		6		33	2
Serenut 14R	Virginia	2	4	Nakabango	2020A	R7	7	14.5	0.77	0.3562	14.2046	0.281571	39.1898	16.0387	22.1611	355.436	-4.22297	33.8032	19.6351	663.727	3.98221	0.0163304	0.00879603	46.1371		3		0	1
ICGV-SM 95714	Valencia	2	4	Nakabango	2020A	R7	8	20	0.67	0.341565	21.481	0.356612	38.8541	13.885	26.8218	372.421	-1.84907	32.3384	23.6667	765.345	7.16988	0.100278	0.0663619	33.8221		6		25	2
ICGV-SM 01731	Virginia	2	4	Nakabango	2020A	R7	3	12	0.72	0.327806	30.5066	0.330155	37.9692	5.82148	25.2961	147.261	-0.470972	19.4582	23.9417	465.862	-7.73215	0.244429	0.179352	26.6242		4		0	1
B7-30-9-3	Spanish	2	4	Nakabango	2020A	R7	8	16.1	0.65	0.347859	21.6927	0.35108	39.5369	13.6124	26.9	366.174	-1.7655	32.1142	23.9878	770.349	7.73207	0.11851	0.0777055	34.4312		6		75	4
JL 24	Spanish	2	5	Nakabango	2020A	R7	4	7	0.32	0.385407	17.8184	0.267699	42.5934	13.1755	23.0734	304.004	-2.23447	30.4897	21.7839	664.187	6.65392	0.0803458	0.0512996	36.1515		7		100	5
SGV 0047	Virginia	2	5	Nakabango	2020A	R7	10	7.3	0.63	0.350926	16.7384	0.264084	38.7431	12.7296	21.0564	268.04	-2.51525	28.1492	19.3069	543.473	5.9238	0.0804679	0.0574375	28.6207		4		40	2
Serenut 6T	Spanish	2	5	Nakabango	2020A	R7	6	13.5	0.38	0.361993	22.3108	0.337408	41.0548	12.8371	26.9372	345.797	-1.56782	31.2784	24.6235	770.184	9.70872	0.130662	0.0789964	39.5415		8		50	3
SGV 0023	Virginia	2	5	Nakabango	2020A	R7	9	10.1	0.76	0.352078	18.5049	0.350134	39.6755	16.522	26.7805	442.466	-2.75738	36.6537	23.3031	854.145	4.77362	0.0583875	0.0342264	41.3806		4		0	1
ICGV-SM 16501	Spanish	2	5	Nakabango	2020A	R7	8	11.7	0.49	0.356736	15.767	0.291376	39.4647	15.4244	22.9881	354.577	-3.36872	33.2798	20.5107	682.592	4.48554	0.0391879	0.0244511	37.6055		8		100	5
ICGV-SM 16520	Spanish	2	5	Nakabango	2020A	R7	12	18.1	0.57	0.357833	18.4045	0.33401	40.163	15.8813	26.0595	413.859	-2.66256	35.47	23.0328	816.973	5.0277	0.0579665	0.0326481	43.6777		7		67	4
SGV 10005	Spanish	2	5	Nakabango	2020A	R7	9	18	0.64	0.357232	14.7115	0.264623	39.2418	14.5059	21.1822	307.267	-3.51891	31.0131	19.1524	593.976	4.52691	0.0402893	0.0263626	34.5666		7		44	3
Serenut 7T	Virginia	2	5	Nakabango	2020A	R7	4	16.9	0.85	0.340939	23.8968	0.337612	38.8752	10.9618	25.8624	283.499	-1.25301	27.4916	23.5751	648.117	17.1664	0.157113	0.118698	24.4503		6		25	4
ICGV 02501	Spanish	2	5	Nakabango	2020A	R7	9	19.4	0.68	0.34611	13.3319	0.284733	38.04	16.6002	21.7711	361.406	-5.0561	34.2247	18.9276	647.791	3.64776	0.00521199	0.00301553	42.1425		5		11	2
SGV 07010	Virginia	2	5	Nakabango	2020A	R7	7	13.7	0.79	0.344575	17.8068	0.346975	38.7484	16.6729	26.0594	434.487	-3.01793	36.3539	22.4593	816.482	4.4835	0.0602482	0.0363567	39.6551		4		0	1
SGV 10010 ER	Spanish	1	1	NaSARRI	2020A	R8	5		0.31	0.350455	41.6741	0.0413543	38.3428	-2.69611	8.56458	-23.0911	0.60292	0.779724	10.1608	7.92262	-0.957562	0.182028	0.135237	25.7053	33.8	5		20	2
Serenut 14R	Virginia	1	1	NaSARRI	2020A	R8	4		0.49	0.364846	81.5371	0.0620171	40.8197	-6.06341	11.2372	-68.1355	0.771934	-2.39211	13.8307	-33.0846	-0.606092	0.271531	0.218119	19.6707	30.8	4		50	3
DOK 1T	Spanish	1	1	NaSARRI	2020A	R8	5		0.45	0.355197	60.4947	0.0719878	39.5471	-4.35995	11.2405	-49.0079	0.64576	-0.170378	13.3984	-2.28279	-0.83933	0.258685	0.17925	30.7072	34.6	6		40	2
ICGV SM 03590	Spanish	1	1	NaSARRI	2020A	R8	5		0.72	0.354559	105.384	0.155156	43.6874	-17.9791	21.1327	-379.947	0.946312	-13.9631	26.2644	-366.734	-0.27412	0.547129	0.492887	9.91404	30.1	4		0	1
ICGV 02501	Spanish	1	1	NaSARRI	2020A	R8	11		0.56	0.343976	93.4665	0.104481	39.966	-10.0252	14.8505	-148.879	0.852168	-5.99076	18.1121	-108.505	-0.443031	0.438304	0.349327	20.3004	33	6		9	2
SGV 0080	Virginia	1	1	NaSARRI	2020A	R8	12		0.63	0.350692	102.517	0.15753	43.0067	-16.9024	20.795	-351.487	0.925252	-12.6792	25.6147	-324.773	-0.303751	0.609768	0.522757	14.2696	30.8	5		8	2
JL 24	Spanish	1	1	NaSARRI	2020A	R8	6		0.45	0.349537	89.6883	0.0847044	39.9152	-8.15327	13.1	-106.808	0.822645	-4.29531	16.0173	-68.7992	-0.503082	0.34019	0.277386	18.4613	33.5	6		50	3
Acholi White	Valencia	1	1	NaSARRI	2020A	R8	7		0.29	0.359216	81.5078	0.0526638	40.0014	-5.53823	10.3268	-57.1924	0.775357	-2.10502	12.6856	-26.7034	-0.606725	0.307492	0.2393	22.1769	35.6	6		29	2
ICGV-SM 16502	Spanish	1	1	NaSARRI	2020A	R8	11		0.43	0.334661	88.2046	0.127575	39.221	-10.0467	16.0978	-161.73	0.813917	-5.5228	19.2159	-106.126	-0.493153	0.435654	0.328006	24.7096	36.1	7		0	1
SGV 0060	Virginia	1	1	NaSARRI	2020A	R8	7		0.64	0.365717	101.296	0.163967	44.8716	-17.5497	21.9515	-385.243	0.916009	-13.2031	27.2171	-359.351	-0.314194	0.587519	0.513969	12.5188	28.6	5		0	1
SGV 0075	Virginia	1	2	NaSARRI	2020A	R8	11		0.51	0.371331	100.131	0.122352	44.0154	-13.7745	17.9983	-247.918	0.901631	-9.72545	22.5667	-219.471	-0.355677	0.483081	0.415009	14.0911	30.8	5		27	2
ICGV 01502	Spanish	1	2	NaSARRI	2020A	R8	12		0.45	0.373824	72.995	0.0561453	41.4953	-5.11517	10.7043	-54.7542	0.727155	-1.38937	13.1707	-18.299	-0.692883	0.304276	0.230423	24.2718	36.8	7		25	2
SGV 07010	Virginia	1	2	NaSARRI	2020A	R8	7		0.62	0.37071	101.948	0.10531	43.5086	-12.8043	16.4943	-211.197	0.911218	-9.02701	20.8054	-187.81	-0.349579	0.476723	0.409608	14.0784	28.1	5		14	2
Serenut 5R	Virginia	1	2	NaSARRI	2020A	R8	3		0.51	0.369318	53.0307	0.0659119	40.8492	-3.74165	10.9324	-40.9053	0.605031	0.520042	13.1094	6.81744	-0.929363	0.194231	0.151251	22.1285	35	5		0	1
12CS-015	Spanish	1	2	NaSARRI	2020A	R8	9		0.54	0.361821	75.2368	0.1186	41.5049	-7.59866	15.572	-118.326	0.711496	-2.57913	18.6529	-48.1081	-0.67802	0.325659	0.231528	28.9048	29.1	6		56	3
DOK 1R	Spanish	1	2	NaSARRI	2020A	R8	9		0.4	0.362706	66.7718	0.0602239	40.2635	-4.62802	10.6475	-49.2769	0.691593	-0.778389	12.8985	-10.04	-0.757661	0.281863	0.204758	27.3555	35.6	7		0	1
B7-30-9-3	Spanish	1	2	NaSARRI	2020A	R8	10		0.48	0.34317	79.1572	0.142828	40.0773	-8.96905	17.0574	-152.988	0.737727	-3.7844	20.1071	-76.0934	-0.61558	0.38317	0.27185	29.0524	34.4	6		20	2
ICGV-SM 08556	Spanish	1	2	NaSARRI	2020A	R8	9		0.44	0.354474	64.4288	0.0762897	39.6088	-4.78702	11.644	-55.74	0.663992	-0.55127	13.8995	-7.66239	-0.799199	0.243104	0.174206	28.3409	37.9	7		33	2
Serenut 7T	Virginia	1	2	NaSARRI	2020A	R8	4		0.72	0.362971	90.884	0.0810218	41.3557	-8.37345	13.2125	-110.634	0.830024	-4.55681	16.3642	-74.5685	-0.493014	0.327587	0.274244	16.2837	32.6	4		0	1
ICGV-SM 01709	Virginia	1	2	NaSARRI	2020A	R8	15		0.61	0.365902	106.566	0.113942	43.616	-14.8838	17.6452	-262.627	0.947467	-11.2634	22.3374	-251.595	-0.29115	0.56584	0.492731	12.9204	29.9	5		20	2
ICGV-SM 95526	Valencia	1	3	NaSARRI	2020A	R8	15		0.5	0.41728	76.5053	0.106056	47.357	-8.17027	16.3176	-133.32	0.719578	-3.0223	20.3728	-61.5726	-0.670237	0.347614	0.267099	23.1622	31.1	7		27	2
ICGV-SM 95355	Virginia	1	3	NaSARRI	2020A	R8	12		0.64	0.378933	103.382	0.10838	44.6479	-13.734	17.2251	-236.57	0.922052	-9.99024	21.8909	-218.695	-0.331517	0.530767	0.464729	12.4419	29.9	6		17	2
Serenut 6T	Spanish	1	3	NaSARRI	2020A	R8	7		0.4	0.370283	29.465	0.0505915	40.3336	-1.60653	9.25645	-14.8707	0.439439	2.56935	10.8931	27.9881	-1.33664	0.147589	0.109725	25.6549	33.6	6		86	4
ICGV-SM 16520	Spanish	1	3	NaSARRI	2020A	R8	9		0.47	0.35594	68.157	0.103732	40.3336	-5.94579	13.9035	-82.6675	0.666285	-1.09954	16.5117	-18.1553	-0.774379	0.288525	0.217934	24.4661	39.6	6		33	2
ICGV 01504	Spanish	1	3	NaSARRI	2020A	R8	10		0.43	0.373763	63.6211	0.08158	41.7773	-5.02108	12.5111	-62.8192	0.649797	-0.462606	15.1032	-6.98682	-0.823418	0.273184	0.201844	26.1142	33.9	7		10	2
SGV 0805	Valencia	1	3	NaSARRI	2020A	R8	6		0.43	0.35499	48.4177	0.0768869	39.3664	-3.30524	11.2835	-37.2946	0.552354	1.2286	13.2402	16.267	-1.03514	0.212282	0.153735	27.5801	30.4	6		17	2
ICGV-SM 01731	Virginia	1	3	NaSARRI	2020A	R8	12		0.62	0.347557	95.2109	0.109634	40.6075	-10.856	15.5435	-168.74	0.865418	-6.799	19.0469	-129.5	-0.418979	0.449904	0.377268	16.1448	30	5		33	2
ICGV-SM 95714	Valencia	1	3	NaSARRI	2020A	R8	6		0.33	0.383008	30.3831	0.0431259	41.6438	-1.90959	9.01551	-17.2159	0.487977	2.08005	10.7944	22.4529	-1.22236	0.147228	0.104363	29.1145	37.4	7		33	2
Serenut 11T	Virginia	1	3	NaSARRI	2020A	R8	8		0.66	0.380472	100.825	0.0892884	43.9934	-11.307	15.1155	-170.911	0.897585	-7.6486	19.2068	-146.905	-0.379037	0.438039	0.377925	13.7233	32.1	5		25	2
Serenut 8R	Virginia	1	3	NaSARRI	2020A	R8	5		0.63	0.358432	75.2114	0.0726541	40.1982	-5.77073	11.7524	-67.8197	0.731058	-1.78484	14.2516	-25.4369	-0.673073	0.274424	0.219818	19.8985	32.8	5		20	2
ICGV-SM 99568	Spanish	1	4	NaSARRI	2020A	R8	14		0.43	0.416761	51.5383	0.0790182	46.0733	-4.11276	13.0144	-53.5249	0.5641	1.04711	15.9642	16.7163	-1.00592	0.226407	0.172862	23.6501	35.1	4		21	3
ICGV-SM 88710	Virginia	1	4	NaSARRI	2020A	R8	12		0.52	0.409053	64.049	0.0814369	45.5748	-5.41689	13.4054	-72.6154	0.647443	-0.561741	16.565	-9.30525	-0.827687	0.269753	0.218414	19.0319	34.1	6		50	3
SGV 0071	Virginia	1	4	NaSARRI	2020A	R8	11		0.51	0.400567	59.379	0.078832	44.5268	-4.81481	12.8448	-61.8452	0.623251	-0.00874628	15.738	-0.137649	-0.87953	0.254455	0.210682	17.2026	34	5		36	3
SGV 0084	Virginia	1	4	NaSARRI	2020A	R8	14		0.54	0.391272	81.5481	0.0841472	44.2044	-7.54356	13.8307	-104.332	0.763697	-3.23671	17.2321	-55.7754	-0.605316	0.341116	0.292137	14.3583	32.1	6		29	2
ICGV 01514	Spanish	1	4	NaSARRI	2020A	R8	7		0.32	0.391417	23.1242	0.053912	42.431	-0.764064	9.66095	-7.38158	0.308807	3.95187	11.3656	44.9154	-1.70168	0.131166	0.0968809	26.1386	33.7	7		57	3
RedBeauty	Valencia	1	4	NaSARRI	2020A	R8	13		0.35	0.381671	29.9555	0.0532204	41.5673	-1.62143	9.65741	-15.6589	0.426984	2.7691	11.4384	31.6741	-1.36592	0.154958	0.109241	29.5031	37	8		62	4
ICGV-SM 03702	Virginia	1	4	NaSARRI	2020A	R8	8		0.52	0.391881	84.9503	0.0786108	44.2438	-7.73342	13.4883	-104.31	0.786027	-3.63645	16.9082	-61.4857	-0.569596	0.360359	0.298841	17.0712	33.5	5		38	2
SGV 0023	Virginia	1	4	NaSARRI	2020A	R8	9		0.64	0.368085	101.657	0.126744	43.9139	-14.5511	18.4742	-268.82	0.91409	-10.5449	23.1544	-244.16	-0.334577	0.568201	0.480898	15.3648	33.7	5		11	2
SGV 990400	Virginia	1	4	NaSARRI	2020A	R8	6		0.73	0.365135	112.137	0.0982173	43.3783	-14.927	16.5891	-247.625	0.979638	-11.6996	21.2444	-248.55	-0.251731	0.556632	0.493258	11.3853	34.2	5		17	2
ICGV-SM 16501	Spanish	1	4	NaSARRI	2020A	R8	13		0.46	0.358221	67.5223	0.0835013	40.2032	-5.3158	12.3716	-65.7651	0.675941	-0.923863	14.8176	-13.6894	-0.770167	0.270796	0.200258	26.0482	35.9	7		46	3
ICGVS-SM 0205	Spanish	1	5	NaSARRI	2020A	R8	7		0.29	0.411845	32.0434	0.0556986	44.803	-1.90205	10.4755	-19.9249	0.433868	2.85788	12.6674	36.2018	-1.34375	0.159331	0.10973	31.1305	37.3	4		57	4
ICGV 9555	Spanish	1	5	NaSARRI	2020A	R8	9		0.43	0.38495	56.3413	0.0838334	42.8695	-4.46217	12.7625	-56.9485	0.599425	0.407409	15.3979	6.27326	-0.925882	0.246055	0.188028	23.5827	37.1	6		33	2
SGV 10005	Spanish	1	5	NaSARRI	2020A	R8	7		0.22	0.380797	23.8417	0.0525644	41.3267	-0.898773	9.40513	-8.45309	0.33595	3.61328	11.0165	39.8057	-1.62197	0.12973	0.0950889	26.7024	39.4	8		57	3
ICGV 01515	Spanish	1	5	NaSARRI	2020A	R8	7		0.4	0.39234	35.6014	0.0569407	42.8466	-2.19293	10.2795	-22.5422	0.473994	2.32405	12.3304	28.6565	-1.2406	0.172844	0.135172	21.7953	40.3	7		43	3
Serenut 4T	Spanish	1	5	NaSARRI	2020A	R8	5		0.42	0.376349	27.6388	0.058448	40.9865	-1.18593	9.82697	-11.6541	0.36393	3.41763	11.4934	39.2803	-1.53277	0.13247	0.0979874	26.0302	38.2	6		80	4
ICGV 01510	Spanish	1	5	NaSARRI	2020A	R8	12		0.41	0.392653	50.1422	0.0590167	43.1931	-3.60576	10.8377	-39.078	0.596469	0.688491	13.2198	9.10168	-0.953957	0.232465	0.179745	22.6788	38	7		50	3
Serenut 9T	Virginia	1	5	NaSARRI	2020A	R8	8		0.61	0.361378	100.958	0.141235	43.5668	-15.3245	19.5368	-299.392	0.910423	-11.1367	24.2594	-270.17	-0.333077	0.560822	0.488878	12.8283	34.4	5		25	2
ICGV-SM 96714	Valencia	1	5	NaSARRI	2020A	R8	9		0.29	0.379417	31.5205	0.0517561	41.3557	-1.84454	9.57735	-17.6659	0.457989	2.42732	11.3719	27.6032	-1.28705	0.153923	0.104579	32.0573	39.4	8		67	4
SGV 0065	Virginia	1	5	NaSARRI	2020A	R8	13		0.71	0.365204	102.835	0.188027	45.8292	-20.2223	24.4619	-494.676	0.929085	-15.8367	30.2308	-478.757	-0.28457	0.727421	0.624116	14.2015	30.1	5		15	2
SGV 0047	Virginia	1	5	NaSARRI	2020A	R8	10		0.67	0.35852	99.4889	0.149944	43.3873	-15.4484	20.0472	-309.697	0.901389	-11.1066	24.7349	-274.721	-0.342772	0.568574	0.476606	16.1752	28.2	6		0	1
ICGV-SM 03702	Virginia	2	1	NaSARRI	2020A	R8	11		0.41	0.396049	82.9604	0.0717918	44.4617	-7.13969	12.8883	-92.0187	0.774176	-3.10944	16.1897	-50.3409	-0.595112	0.349056	0.285569	18.188	36	5		82	4
Serenut 4T	Spanish	2	1	NaSARRI	2020A	R8	8		0.41	0.368697	52.4371	0.0778001	40.9424	-3.838	11.7963	-45.2742	0.58169	0.78068	14.0486	10.9675	-0.969257	0.24227	0.170107	29.7861	31.6	6		50	3
ICGV-SM 99568	Spanish	2	1	NaSARRI	2020A	R8	9		0.44	0.367579	56.0229	0.0752345	40.8591	-4.13393	11.6744	-48.261	0.61088	0.333222	13.9628	4.65271	-0.908845	0.241522	0.181092	25.0205	31.5	7		44	3
ICGV SM 03590	Spanish	2	1	NaSARRI	2020A	R8	4		0.7	0.369436	50.9472	0.0756532	40.962	-3.68302	11.6125	-42.7689	0.574762	0.904704	13.8304	12.5125	-0.986314	0.186014	0.161824	13.0046	30	4		25	2
12CS-015	Spanish	2	1	NaSARRI	2020A	R8	9		0.38	0.379228	33.3437	0.0704011	41.5241	-1.62389	10.879	-17.6663	0.388641	3.33779	12.75	42.5569	-1.44904	0.158283	0.114123	27.8991	32.2	7		78	4
ICGV-SM 16502	Spanish	2	1	NaSARRI	2020A	R8	10		0.52	0.407705	47.2794	0.0692076	44.8759	-3.519	11.8893	-41.8384	0.55082	1.31877	14.5129	19.1393	-1.04492	0.205531	0.151468	26.3041	34.4	7		30	2
SGV 0805	Valencia	2	1	NaSARRI	2020A	R8	3		0.4	0.368311	26.5342	0.0537251	40.0722	-1.15926	9.32529	-10.8104	0.376028	3.18985	10.8665	34.6625	-1.50477	0.136724	0.0858528	37.2071	41.6	7		33	2
Serenut 9T	Virginia	2	1	NaSARRI	2020A	R8	7		0.61	0.387253	103.7	0.118113	45.9701	-15.0142	18.5654	-278.745	0.926224	-11.1947	23.6885	-265.185	-0.320312	0.560748	0.497271	11.3201	28.5	5		14	2
ICGV-SM 08556	Spanish	2	1	NaSARRI	2020A	R8	12		0.42	0.365727	82.0782	0.0991816	41.7773	-7.98245	14.4301	-115.188	0.767319	-3.54909	17.6073	-62.4899	-0.589366	0.372094	0.280635	24.5796	34.6	7		8	2
Serenut 11T	Virginia	2	1	NaSARRI	2020A	R8	7		0.56	0.400542	98.6438	0.104185	46.5923	-12.5787	17.0913	-214.986	0.885471	-8.59898	21.8573	-187.951	-0.389694	0.497463	0.423454	14.8771	37.4	6		43	2
ICGV 01502	Spanish	2	2	NaSARRI	2020A	R8	13		0.45	0.406561	70.6849	0.0693896	45.221	-5.72949	12.5031	-71.6362	0.699803	-1.39236	15.6094	-21.7338	-0.734209	0.301643	0.230523	23.5775	35	7		69	4
SGV 990400	Virginia	2	2	NaSARRI	2020A	R8	3		0.62	0.369529	65.4113	0.0427333	40.6767	-4.11717	9.38675	-38.6468	0.705626	-0.678237	11.4976	-7.79809	-0.745255	0.261873	0.210362	19.6701	37.6	5		67	2
SGV 0071	Virginia	2	2	NaSARRI	2020A	R8	7		0.71	0.361335	96.9409	0.131774	42.9336	-13.2733	18.2104	-241.713	0.878798	-8.9625	22.4952	-201.614	-0.386125	0.514867	0.430732	16.341	29.6	6		29	2
ICGV 01510	Spanish	2	2	NaSARRI	2020A	R8	11		0.5	0.365077	81.3406	0.0926766	41.5289	-7.52602	13.8228	-104.03	0.762996	-3.20188	16.8709	-54.0187	-0.601203	0.351378	0.277192	21.1129	31	7		18	2
ICGV-SM 95355	Virginia	2	2	NaSARRI	2020A	R8	12		0.7	0.35436	94.6906	0.139374	42.1976	-12.9871	18.4061	-239.042	0.863584	-8.49917	22.4988	-191.221	-0.406265	0.486759	0.410782	15.6088	31.1	6		17	2
DOK 1R	Spanish	2	2	NaSARRI	2020A	R8	8		0.37	0.375987	46.3111	0.0562075	41.317	-3.1653	10.1996	-32.2848	0.579928	0.956374	12.2719	11.7366	-0.992915	0.239273	0.170439	28.7681	37.5	7		25	2
ICGVS-SM 0205	Spanish	2	2	NaSARRI	2020A	R8	5		0.33	0.375965	36.6212	0.0512411	41.0841	-2.33239	9.60154	-22.3945	0.515294	1.78213	11.4591	20.4216	-1.14651	0.195701	0.136274	30.3666	36	7		40	3
Serenut 8R	Virginia	2	2	NaSARRI	2020A	R8	3		0.61	0.391058	74.6757	0.0713229	43.6963	-6.05666	12.425	-75.2538	0.724442	-1.86859	15.4159	-28.806	-0.686226	0.268341	0.224989	16.1555	31.1	5		0	1
SGV 10010 ER	Spanish	2	2	NaSARRI	2020A	R8	9		0.44	0.36609	84.6699	0.0889587	41.6677	-7.86064	13.684	-107.565	0.786051	-3.69791	16.805	-62.1434	-0.563044	0.363517	0.282041	22.4131	31.6	7		56	3
SGV 0060	Virginia	2	2	NaSARRI	2020A	R8	5		0.65	0.378668	88.61	0.118695	43.9978	-10.6417	16.9661	-180.549	0.813884	-6.04078	20.9823	-126.75	-0.497502	0.403057	0.332738	17.4463	33.7	5		20	2
DOK 1T	Spanish	2	3	NaSARRI	2020A	R8	1		0.35	0.386385	28.755	0.0405402	41.9528	-1.86836	8.85596	-16.5461	0.489301	2.06495	10.6366	21.964	-1.22252	0.177083	0.117651	33.5615	39.6	6		300	1
ICGV-SM 88710	Virginia	2	3	NaSARRI	2020A	R8	15		0.63	0.379506	100.827	0.170128	46.649	-18.3814	23.1221	-425.018	0.911991	-13.958	28.8529	-402.731	-0.317155	0.671482	0.567327	15.5112	26.1	6		13	1
SGV 0065	Virginia	2	3	NaSARRI	2020A	R8	7		0.73	0.36126	99.5525	0.15937	44.011	-16.3046	21.0507	-343.223	0.902334	-11.8788	25.966	-308.446	-0.336909	0.611998	0.510565	16.574	30.7	5		14	2
RedBeauty	Valencia	2	3	NaSARRI	2020A	R8	11		0.33	0.387508	54.154	0.0499327	42.5749	-3.76617	10.1154	-38.0962	0.640547	0.132445	12.403	1.64271	-0.869251	0.270447	0.190436	29.5848	37.7	8		55	4
ICGV 9555	Spanish	2	3	NaSARRI	2020A	R8	12		0.46	0.354282	75.2291	0.101245	40.3186	-6.83676	13.9482	-95.3605	0.719466	-2.24635	16.71	-37.5366	-0.674656	0.337789	0.24158	28.4818	31.9	7		0	1
ICGV-SM 95526	Valencia	2	3	NaSARRI	2020A	R8	14		0.6	0.373343	81.746	0.123256	43.1659	-9.24653	16.7122	-154.53	0.760165	-4.2952	20.3468	-87.3937	-0.58699	0.406732	0.299773	26.2971	29.1	7		0	1
ICGV 01504	Spanish	2	3	NaSARRI	2020A	R8	9		0.34	0.374573	61.4675	0.060277	41.4616	-4.34578	10.7922	-46.9007	0.662509	-0.335807	13.1283	-4.40859	-0.815294	0.289697	0.209032	27.8447	35.2	7		11	2
SGV 0080	Virginia	2	3	NaSARRI	2020A	R8	13		0.62	0.387387	97.038	0.123656	45.6501	-13.415	18.4439	-247.424	0.877388	-9.14375	23.2306	-212.415	-0.392123	0.532404	0.444464	16.5175	28.5	6		8	2
ICGV-SM 01709	Virginia	2	3	NaSARRI	2020A	R8	8		0.68	0.355451	98.9587	0.111862	41.7916	-12.1395	16.3234	-198.158	0.891937	-8.17745	20.2381	-165.496	-0.376014	0.46716	0.391328	16.2326	29.9	6		0	1
SGV 0075	Virginia	2	3	NaSARRI	2020A	R8	10		0.69	0.35743	100.556	0.141247	43.0705	-15.0537	19.3094	-290.677	0.907935	-10.8502	23.896	-259.278	-0.336981	0.569253	0.483242	15.1094	25.8	6		10	2
Serenut 5R	Virginia	2	4	NaSARRI	2020A	R8	6		0.49	0.402868	86.8441	0.0795504	45.5245	-8.26471	13.9567	-115.348	0.797944	-4.15326	17.6567	-73.3327	-0.548156	0.376686	0.292636	22.3132	35	5		33	2
SGV 0084	Virginia	2	4	NaSARRI	2020A	R8	14		0.72	0.36294	99.2403	0.158461	44.1518	-16.1776	21.0187	-340.031	0.899437	-11.7331	25.9432	-304.394	-0.341555	0.625967	0.513087	18.0328	28.9	6		14	2
ICGV-SM 96714	Valencia	2	4	NaSARRI	2020A	R8	12		0.6	0.360582	74.3975	0.0957572	40.8787	-6.5853	13.6503	-89.8913	0.714395	-2.04119	16.4415	-33.5601	-0.687806	0.300043	0.21383	28.7335	31	7		25	2
ICGV 01515	Spanish	2	4	NaSARRI	2020A	R8	7		0.62	0.357818	82.9412	0.113542	41.2638	-8.71534	15.4486	-134.64	0.772163	-4.08886	18.6876	-76.4109	-0.571941	0.41201	0.304699	26.0458	32.3	7		14	2
Acholi White	Valencia	2	4	NaSARRI	2020A	R8	10		0.59	0.387143	74.7362	0.076814	43.3963	-6.26288	12.8211	-80.2968	0.723252	-1.96884	15.8399	-31.1863	-0.684313	0.327826	0.241855	26.2246	34.5	7		50	3
ICGV 01514	Spanish	2	4	NaSARRI	2020A	R8	7		0.37	0.377742	56.3992	0.0493395	41.5529	-3.81905	9.91738	-37.875	0.654032	-0.0375908	12.1024	-0.45494	-0.842072	0.260775	0.190163	27.0779	30.7	7		14	2
Serenut 14R	Virginia	2	4	NaSARRI	2020A	R8
ICGV-SM 95714	Valencia	2	4	NaSARRI	2020A	R8	10		0.53	0.37149	86.0139	0.116673	43.0067	-9.76614	16.3483	-159.66	0.794125	-5.12187	20.0483	-102.685	-0.532149	0.438909	0.328491	25.1572	30.2	6		20	2
ICGV-SM 01731	Virginia	2	4	NaSARRI	2020A	R8	11		0.61	0.36098	104.1	0.187052	45.4489	-20.527	24.3527	-499.887	0.938411	-16.2367	30.0922	-488.6	-0.27162	0.755234	0.653502	13.4702	30.3	6		9	2
B7-30-9-3	Spanish	2	4	NaSARRI	2020A	R8	8		0.45	0.360252	78.1754	0.106304	41.1862	-7.59856	14.6745	-111.505	0.738929	-2.94382	17.7029	-52.1141	-0.635619	0.362701	0.25985	28.3569	30.9	7		25	2
JL 24	Spanish	2	5	NaSARRI	2020A	R8	3		0.35	0.399119	58.9244	0.0390458	43.6874	-3.94067	9.54051	-37.596	0.682357	-0.362128	11.8971	-4.30826	-0.794539	0.287435	0.213723	25.6447	39.6	6		100	5
SGV 0047	Virginia	2	5	NaSARRI	2020A	R8	11		0.6	0.376304	100.508	0.170723	46.2582	-18.1712	22.9824	-417.619	0.909589	-13.7164	28.5986	-392.27	-0.320494	0.675853	0.56977	15.6961	30.3	6		9	2
Serenut 6T	Spanish	2	5	NaSARRI	2020A	R8	5		0.42	0.35741	47.5859	0.0561001	39.3457	-3.16999	9.83588	-31.1797	0.595464	0.756188	11.6922	8.84147	-0.959147	0.202953	0.137422	32.2889	38.8	7		60	3
SGV 0023	Virginia	2	5	NaSARRI	2020A	R8	8		0.45	0.364878	85.1526	0.0796689	41.3315	-7.42539	12.8726	-95.584	0.791191	-3.46744	15.8445	-54.9398	-0.560116	0.37335	0.284666	23.7535	29.8	5		38	2
ICGV-SM 16501	Spanish	2	5	NaSARRI	2020A	R8	10		0.41	0.360641	70.7547	0.0932766	40.7311	-6.01604	13.3159	-80.109	0.690149	-1.43607	15.9799	-22.9483	-0.73544	0.330297	0.224558	32.0134	31.8	7		30	2
ICGV-SM 16520	Spanish	2	5	NaSARRI	2020A	R8	9		0.45	0.371471	76.6022	0.100994	42.2585	-7.30872	14.4928	-105.924	0.728787	-2.6398	17.6213	-46.5168	-0.657611	0.365248	0.253983	30.4627	32	7		33	2
SGV 10005	Spanish	2	5	NaSARRI	2020A	R8	7		0.35	0.387667	69.9579	0.0676732	43.1523	-5.39457	11.8961	-64.1747	0.699215	-1.22275	14.673	-17.9414	-0.736886	0.310714	0.225599	27.3934	37.8	7		29	2
Serenut 7T	Virginia	2	5	NaSARRI	2020A	R8	5		0.57	0.387608	91.1248	0.0976442	44.5398	-9.99494	15.4876	-154.797	0.830355	-5.79226	19.441	-112.607	-0.482165	0.442765	0.352413	20.4062	32.1	6		20	2
ICGV 02501	Spanish	2	5	NaSARRI	2020A	R8	10		0.71	0.375417	69.7377	0.0908694	42.2772	-6.00672	13.5126	-81.1663	0.68294	-1.33199	16.3835	-21.8227	-0.750796	0.318834	0.214353	32.7698	36	7		10	2
SGV 07010	Virginia	2	5	NaSARRI	2020A	R8	11		0.7	0.382157	104.963	0.152795	46.8023	-18.6615	22.1292	-412.966	0.940951	-14.6661	27.9902	-410.508	-0.282298	0.686587	0.610697	11.0533	28.3	5		0	1
SGV 10010 ER	Spanish	1	1	NaSARRI	2020A	R8	7		0.45	0.395766	73.1442	0.056908	43.8607	-5.34326	11.2419	-60.0682	0.721434	-1.44789	14.0305	-20.3146	-0.702897	0.29885	0.221286	25.9543	35.2	5		43	3
Serenut 14R	Virginia	1	1	NaSARRI	2020A	R8
DOK 1T	Spanish	1	1	NaSARRI	2020A	R8	4		0.3	0.39301	27.2654	0.0350908	42.5934	-1.9487	8.58767	-16.7348	0.511201	1.83974	10.4029	19.1386	-1.17562	0.168726	0.114666	32.0398	39.3	7		50	3
ICGV SM 03590	Spanish	1	1	NaSARRI	2020A	R8	1		0.53	0.395774	46.0685	0.0537369	43.3783	-3.24384	10.4005	-33.7374	0.57959	0.973987	12.6965	12.3662	-0.995911	0.204908	0.148105	27.7211	37.1	4		0	1
ICGV 02501	Spanish	1	1	NaSARRI	2020A	R8	11		0.48	0.380122	66.3854	0.0804657	42.51	-5.3506	12.6728	-67.8074	0.66766	-0.823408	15.4181	-12.6954	-0.788487	0.269127	0.191221	28.9478	36.1	7		18	2
SGV 0080	Virginia	1	1	NaSARRI	2020A	R8	6		0.63	0.356356	92.8196	0.100068	41.2105	-9.86155	14.832	-146.267	0.845468	-5.81771	18.2581	-106.22	-0.456231	0.444783	0.355831	19.999	33.2	6		50	3
JL 24	Spanish	1	1	NaSARRI	2020A	R8	4		0.5	0.390185	67.838	0.0799761	43.6205	-5.60896	12.9346	-72.5499	0.676329	-1.04552	15.8713	-16.5937	-0.771665	0.311016	0.215003	30.8709	33.3	6		75	3
Acholi White	Valencia	1	1	NaSARRI	2020A	R8	6		0.34	0.380292	46.7203	0.0518922	41.7249	-3.20415	9.96984	-31.9449	0.593221	0.804096	12.0685	9.70423	-0.968053	0.225969	0.153312	32.1532	34	7		17	2
ICGV-SM 16502	Spanish	1	1	NaSARRI	2020A	R8	10		0.28	0.402197	39.8935	0.0437505	43.8253	-2.78359	9.61044	-26.7515	0.564966	1.22681	11.7833	14.4558	-1.03925	0.208209	0.139014	33.2332	34.1	7		50	3
SGV 0060	Virginia	1	1	NaSARRI	2020A	R8	10		0.64	0.380244	96.1971	0.134036	45.1106	-13.795	19.103	-263.526	0.872914	-9.37565	23.8588	-223.692	-0.393848	0.546188	0.444571	18.6048	31.5	6		10	2
SGV 0075	Virginia	1	2	NaSARRI	2020A	R8	13		0.7	0.383537	95.894	0.137927	45.5832	-14.0889	19.5691	-275.708	0.87073	-9.59992	24.4562	-234.778	-0.39526	0.540203	0.429629	20.4689	32.5	6		23	2
ICGV 01502	Spanish	1	2	NaSARRI	2020A	R8	11		0.42	0.372266	79.6552	0.0827693	42.0425	-6.93515	13.1187	-90.98	0.753796	-2.72666	16.1061	-43.9159	-0.624191	0.34886	0.256505	26.4732	35.6	7		36	2
SGV 07010	Virginia	1	2	NaSARRI	2020A	R8	5		0.66	0.372098	96.3337	0.0753636	42.4124	-9.04673	13.2217	-119.613	0.86355	-5.44675	16.6268	-90.5619	-0.4412	0.397913	0.325835	18.1142	36	5		40	3
Serenut 5R	Virginia	1	2	NaSARRI	2020A	R8	2		0.38	0.380566	61.0651	0.0393373	41.7488	-3.89844	9.25627	-36.085	0.692129	-0.447393	11.4121	-5.10568	-0.77489	0.278616	0.203453	26.9773	36.3	5		50	2
12CS-015	Spanish	1	2	NaSARRI	2020A	R8	11		0.45	0.39305	72.6432	0.0874905	44.2	-6.48739	13.803	-89.5453	0.703359	-1.8389	17.0154	-31.2895	-0.714026	0.319711	0.223008	30.247	37	7		82	4
DOK 1R	Spanish	1	2	NaSARRI	2020A	R8	10		0.62	0.383616	88.2304	0.109773	44.2919	-10.1027	16.2923	-164.597	0.810565	-5.60391	20.2505	-113.482	-0.508169	0.469566	0.351541	25.135	30.2	6		0	1
B7-30-9-3	Spanish	1	2	NaSARRI	2020A	R8	9		0.52	0.371491	78.6925	0.094577	42.1929	-7.34739	14.0615	-103.315	0.745008	-2.87086	17.1759	-49.3096	-0.632165	0.37101	0.263826	28.8898	38.8	7		44	3
ICGV-SM 08556	Spanish	1	2	NaSARRI	2020A	R8	10		0.6	0.348158	75.2423	0.0930014	39.475	-6.42006	13.0984	-84.0924	0.723258	-2.05688	15.6584	-32.2074	-0.673327	0.310824	0.220062	29.2005	33.9	7		20	2
Serenut 7T	Virginia	1	2	NaSARRI	2020A	R8	5		0.62	0.362386	95.2745	0.113529	42.4031	-11.5143	16.4273	-189.15	0.864797	-7.35342	20.3353	-149.534	-0.41765	0.454117	0.375703	17.2673	30	5		40	3
ICGV-SM 01709	Virginia	1	2	NaSARRI	2020A	R8	7		0.68	0.384167	107.038	0.123305	46.1145	-16.6006	19.3924	-321.926	0.951564	-12.9473	24.8188	-321.337	-0.280439	0.621389	0.549118	11.6305	30.2	5		43	3
ICGV-SM 95526	Valencia	1	3	NaSARRI	2020A	R8	11		0.44	0.379745	81.0333	0.090085	43.0705	-7.57873	14.0068	-106.154	0.759667	-3.20254	17.2772	-55.331	-0.608698	0.364088	0.265388	27.1088	36.9	7		18	2
ICGV-SM 95355	Virginia	1	3	NaSARRI	2020A	R8	10		0.65	0.350203	101.711	0.174748	43.4368	-17.9695	22.2635	-400.064	0.920111	-13.5606	27.2596	-369.656	-0.303657	0.67247	0.57249	14.8676	30.1	6		20	2
Serenut 6T	Spanish	1	3	NaSARRI	2020A	R8	6		0.61	0.361038	84.8354	0.102421	41.4376	-8.52619	14.7054	-125.381	0.786263	-4.14326	17.9329	-74.3005	-0.554235	0.399254	0.304778	23.6631	30.6	6		17	2
ICGV-SM 16520	Spanish	1	3	NaSARRI	2020A	R8	9		0.51	0.348147	75.6152	0.105486	39.7318	-6.94128	14.0942	-97.8316	0.720773	-2.32249	16.7901	-38.9948	-0.66961	0.343135	0.237004	30.9298	31.5	7		22	2
ICGV 01504	Spanish	1	3	NaSARRI	2020A	R8	11		0.47	0.384729	74.6229	0.0611358	42.8007	-5.56483	11.4106	-63.498	0.730424	-1.66663	14.1435	-23.572	-0.682736	0.346489	0.247409	28.5954	31.6	7		18	2
SGV 0805	Valencia	1	3	NaSARRI	2020A	R8	6		0.42	0.370153	57.4436	0.0442975	40.6817	-3.74235	9.39527	-35.1604	0.670884	-0.182721	11.443	-2.09088	-0.812649	0.287968	0.201806	29.9206	31.7	7		50	3
ICGV-SM 01731	Virginia	1	3	NaSARRI	2020A	R8	11		0.64	0.350299	100.357	0.129639	41.8533	-13.818	17.9096	-247.476	0.905536	-9.72906	22.0969	-214.982	-0.346306	0.554859	0.459192	17.2418	31	7		18	2
ICGV-SM 95714	Valencia	1	3	NaSARRI	2020A	R8	14		0.57	0.339638	87.3013	0.126969	39.7318	-9.94728	16.1931	-161.077	0.806716	-5.36917	19.381	-104.06	-0.505311	0.42478	0.317859	25.1709	33.5	7		29	3
Serenut 11T	Virginia	1	3	NaSARRI	2020A	R8	8		0.6	0.377226	100.518	0.14328	45.4279	-15.8788	20.3446	-323.046	0.906891	-11.6391	25.5011	-296.809	-0.337232	0.622145	0.522812	15.9662	30.7	5		13	2
Serenut 8R	Virginia	1	3	NaSARRI	2020A	R8	3		0.73	0.377887	87.1462	0.0637786	42.4171	-6.96994	11.8792	-82.7971	0.803052	-3.30964	14.8482	-49.1423	-0.550092	0.34911	0.278451	20.2399	28.5	5		0	1
ICGV-SM 99568	Spanish	1	4	NaSARRI	2020A	R8	8		0.46	0.395514	79.3477	0.0833337	44.5745	-7.25008	13.7704	-99.8365	0.749309	-2.87303	17.1625	-49.3084	-0.631763	0.36423	0.271179	25.5474	35	7		25	2
ICGV-SM 88710	Virginia	1	4	NaSARRI	2020A	R8	13		0.81	0.360429	104.657	0.200542	45.9536	-21.9802	25.727	-565.486	0.943606	-17.6774	31.7117	-560.58	-0.258675	0.773276	0.672932	12.9765	27.6	6		23	2
SGV 0071	Virginia	1	4	NaSARRI	2020A	R8	11		0.8	0.354474	101.359	0.22658	45.6543	-22.1385	27.2026	-602.224	0.919268	-17.4137	32.9582	-573.925	-0.283121	0.779569	0.670034	14.0506	28.6	5		9	2
SGV 0084	Virginia	1	4	NaSARRI	2020A	R8	10		0.76	0.351816	100.579	0.164079	43.1568	-16.7179	21.1907	-354.263	0.910743	-12.3187	25.9858	-320.111	-0.322282	0.617351	0.528432	14.4033	32.2	5		20	2
ICGV 01514	Spanish	1	4	NaSARRI	2020A	R8	9		0.52	0.361294	89.4312	0.111985	41.9149	-10.0064	15.8154	-158.256	0.820706	-5.62988	19.3822	-109.12	-0.490247	0.428879	0.338426	21.0906	33.6	6		22	2
RedBeauty	Valencia	1	4	NaSARRI	2020A	R8	9		0.44	0.371146	78.4865	0.10376	42.3472	-7.71266	14.8114	-114.235	0.740746	-3.0403	18.0307	-54.8188	-0.633881	0.346665	0.245949	29.0527	34	7		11	2
ICGV-SM 03702	Virginia	1	4	NaSARRI	2020A	R8	12		0.67	0.369582	106.261	0.133608	44.7514	-16.8619	19.7714	-333.385	0.949261	-13.0754	24.9835	-326.668	-0.279273	0.646104	0.560462	13.2551	31.1	5		42	3
SGV 0023	Virginia	1	4	NaSARRI	2020A	R8	7		0.61	0.340727	103.145	0.142923	41.3991	-15.5146	19.055	-295.631	0.928581	-11.4436	23.3976	-267.753	-0.305627	0.601772	0.505622	15.978	38.1	5		14	2
SGV 990400	Virginia	1	4	NaSARRI	2020A	R8	4		0.65	0.375049	110.096	0.117207	45.1149	-16.7456	18.7726	-314.359	0.971878	-13.3057	24.0465	-319.956	-0.253981	0.611375	0.534418	12.5874	31.4	4		25	2
ICGV-SM 16501	Spanish	1	4	NaSARRI	2020A	R8	9		0.51	0.348855	82.2209	0.130701	40.6124	-9.22809	16.4934	-152.203	0.765532	-4.33922	19.7017	-85.4901	-0.573561	0.425056	0.302485	28.8364	36.3	7		22	2
ICGVS-SM 0205	Spanish	1	5	NaSARRI	2020A	R8	6		0.39	0.378399	63.1934	0.0766506	42.1882	-4.92723	12.2227	-60.2243	0.653139	-0.461288	14.8312	-6.84145	-0.820618	0.27211	0.192102	29.4027	39.9	7		50	3
ICGV 9555	Spanish	1	5	NaSARRI	2020A	R8	8		0.39	0.357052	69.9325	0.08953	40.2434	-5.76112	12.8874	-74.2461	0.688205	-1.28597	15.4316	-19.8446	-0.741955	0.291339	0.207725	28.6996	37	7		25	2
SGV 10005	Spanish	1	5	NaSARRI	2020A	R8	5		0.49	0.358164	65.6849	0.0825062	40.1378	-5.07911	12.2361	-62.1483	0.663833	-0.672726	14.6281	-9.84072	-0.794768	0.296308	0.20312	31.4496	38.4	7		40	2
ICGV 01515	Spanish	1	5	NaSARRI	2020A	R8	9		0.56	0.361974	75.4131	0.0871103	40.8885	-6.42672	13.0325	-83.7561	0.726003	-2.09386	15.7804	-33.0419	-0.672161	0.305507	0.228338	25.2593	34.9	7		33	2
Serenut 4T	Spanish	1	5	NaSARRI	2020A	R8	9		0.46	0.355679	78.1058	0.135394	41.2928	-8.72842	16.8705	-147.253	0.731491	-3.54559	20.0994	-71.2644	-0.631114	0.418583	0.284628	32.002	37.7	7		0	1
ICGV 01510	Spanish	1	5	NaSARRI	2020A	R8	8		0.34	0.346693	84.7191	0.110493	40.0217	-8.68247	14.9099	-129.455	0.787437	-4.24774	17.9498	-76.2461	-0.547561	0.423719	0.31815	24.9148	31.8	7		0	1
Serenut 9T	Virginia	1	5	NaSARRI	2020A	R8	8		0.69	0.354455	99.7993	0.220487	45.221	-20.8723	26.3646	-550.29	0.90687	-16.0372	31.889	-511.411	-0.303556	0.768554	0.651428	15.2398	30.5	5		13	2
ICGV-SM 96714	Valencia	1	5	NaSARRI	2020A	R8	11		0.48	0.34887	84.6875	0.175328	41.7868	-12.0058	20.3141	-243.888	0.780664	-6.53624	24.0503	-157.198	-0.522819	0.518685	0.358532	30.8766	30.6	7		18	4
SGV 0065	Virginia	1	5	NaSARRI	2020A	R8	11		0.66	0.343365	99.657	0.24447	44.6091	-21.9962	27.7872	-611.212	0.905659	-17.0036	33.1349	-563.412	-0.295888	0.807699	0.677273	16.148	29	6		9	2
SGV 0047	Virginia	1	5	NaSARRI	2020A	R8	8		0.77	0.379119	99.7741	0.159979	46.1392	-17.0704	21.9617	-374.897	0.902796	-12.6388	27.412	-346.456	-0.335515	0.625493	0.527294	15.6996	29.1	5		0	1
ICGV-SM 03702	Virginia	2	1	NaSARRI	2020A	R8	9		0.76	0.394504	103.937	0.173748	48.9239	-20.721	24.715	-512.12	0.935524	-16.5608	31.2723	-517.893	-0.280784	0.734673	0.64129	12.7109	29.6	5		0	1
Serenut 4T	Spanish	2	1	NaSARRI	2020A	R8	10		0.48	0.352083	86.0548	0.146811	41.5625	-11.0162	18.2181	-200.694	0.794871	-6.01281	21.8542	-131.405	-0.51413	0.479292	0.358349	25.2336	34.1	7		10	2
ICGV-SM 99568	Spanish	2	1	NaSARRI	2020A	R8	4		0.64	0.382637	65.721	0.053288	42.2678	-4.53647	10.5018	-47.641	0.690408	-0.715566	12.9287	-9.25133	-0.765701	0.30705	0.225785	26.4661	35.4	7		50	3
ICGV SM 03590	Spanish	2	1	NaSARRI	2020A	R8	4		0.79	0.36851	103.611	0.166853	45.558	-18.844	22.6885	-427.542	0.933121	-14.6443	28.2862	-414.23	-0.28777	0.613102	0.545712	10.9916	30.4	4		0	1
12CS-015	Spanish	2	1	NaSARRI	2020A	R8	10		0.51	0.354516	76.9981	0.125296	40.8983	-8.06304	15.9484	-128.592	0.724712	-3.03768	19.0113	-57.7504	-0.649644	0.375991	0.25327	32.6393	35.6	7		30	2
ICGV-SM 16502	Spanish	2	1	NaSARRI	2020A	R8	11		0.44	0.356645	82.8729	0.11527	41.1717	-8.79005	15.5487	-136.674	0.772734	-4.14544	18.786	-77.8762	-0.569985	0.410025	0.298357	27.2346	35.1	7		18	2
SGV 0805	Valencia	2	1	NaSARRI	2020A	R8	7		0.53	0.35773	82.7766	0.0934614	40.7853	-7.6889	13.7412	-105.655	0.774753	-3.44262	16.7131	-57.537	-0.580008	0.380956	0.287158	24.6217	34.9	6		57	3
Serenut 9T	Virginia	2	1	NaSARRI	2020A	R8	9		0.66	0.352962	97.0148	0.180413	43.4458	-16.6271	22.279	-370.435	0.883427	-11.8501	27.0424	-320.456	-0.355764	0.650274	0.542972	16.5011	30.9	6		11	2
ICGV-SM 08556	Spanish	2	1	NaSARRI	2020A	R8	8		0.44	0.368158	63.0615	0.0878677	41.2687	-5.09176	12.8413	-65.385	0.643504	-0.41733	15.398	-6.42603	-0.831424	0.265962	0.183461	31.0196	35	7		25	2
Serenut 11T	Virginia	2	1	NaSARRI	2020A	R8	5		0.51	0.392638	84.4359	0.0801932	44.353	-7.78401	13.6367	-106.148	0.783564	-3.64065	17.0878	-62.2108	-0.572852	0.336926	0.280932	16.619	31.8	4		60	4
ICGV 01502	Spanish	2	2	NaSARRI	2020A	R8	13		0.45	0.385256	74.1129	0.114051	43.9536	-7.58948	15.9002	-120.674	0.701476	-2.42478	19.3532	-46.9273	-0.699291	0.356159	0.252021	29.2392	37.3	7		0	1
SGV 990400	Virginia	2	2	NaSARRI	2020A	R8	6		0.82	0.383905	101.531	0.173081	47.3491	-19.1111	23.7349	-453.599	0.91735	-14.7267	29.7131	-437.575	-0.307802	0.674149	0.583374	13.4651	32.6	5		0	1
SGV 0071	Virginia	2	2	NaSARRI	2020A	R8	10		0.61	0.350431	96.3368	0.204785	43.8031	-17.9459	24.1934	-434.173	0.878359	-12.9231	29.0909	-375.944	-0.352626	0.66647	0.548288	17.7325	33.1	5		30	2
ICGV 01510	Spanish	2	2	NaSARRI	2020A	R8	9		0.49	0.364457	69.2999	0.097421	41.1911	-6.02593	13.7007	-82.5592	0.677963	-1.28384	16.4377	-21.1035	-0.75602	0.296488	0.213617	27.9511	35.7	7		0	1
ICGV-SM 95355	Virginia	2	2	NaSARRI	2020A	R8	13		0.83	0.373848	105.34	0.170225	46.5314	-20.1644	23.5681	-475.235	0.946265	-16.0931	29.5588	-475.694	-0.267206	0.687891	0.609309	11.4236	33	5		8	2
DOK 1R	Spanish	2	2	NaSARRI	2020A	R8	10		0.4	0.352393	77.106	0.135097	40.8689	-8.43442	16.6644	-140.555	0.722977	-3.24134	19.7736	-64.093	-0.646776	0.380231	0.262113	31.0648	35.6	7		0	1
ICGVS-SM 0205	Spanish	2	2	NaSARRI	2020A	R8	7		0.49	0.371534	57.5828	0.0959839	41.639	-4.66022	13.3918	-62.4087	0.594186	0.399353	15.9386	6.36514	-0.927367	0.26333	0.17822	32.3207	36.1	7		43	3
Serenut 8R	Virginia	2	2	NaSARRI	2020A	R8	4		0.59	0.384368	82.1528	0.0811927	43.4053	-7.38678	13.4183	-99.1182	0.769249	-3.20113	16.6701	-53.3632	-0.597424	0.327601	0.273551	16.4989	33.1	4		50	3
SGV 10010 ER	Spanish	2	2	NaSARRI	2020A	R8	7		0.57	0.374856	66.8032	0.0811974	41.9575	-5.35011	12.6078	-67.453	0.669918	-0.855175	15.2838	-13.0703	-0.783514	0.278905	0.202925	27.2421	38.4	5		29	2
SGV 0060	Virginia	2	2	NaSARRI	2020A	R8	8		0.56	0.369299	96.5052	0.160495	44.704	-15.5611	21.1693	-329.419	0.877865	-10.9079	26.0931	-284.619	-0.373286	0.567301	0.479115	15.5447	29.9	5		13	2
DOK 1T	Spanish	2	3	NaSARRI	2020A	R8	4		0.42	0.405896	48.5707	0.0834035	44.9144	-3.70409	13.0105	-48.192	0.531098	1.5824	15.7591	24.9371	-1.07675	0.232726	0.163722	29.6501	36.2	6		0	1
ICGV-SM 88710	Virginia	2	3	NaSARRI	2020A	R8	9		0.73	0.396378	84.8799	0.111841	45.5874	-9.75498	16.6799	-162.712	0.784036	-5.00045	20.7806	-103.912	-0.551888	0.396609	0.324966	18.0638	30.7	5		22	2
SGV 0065	Virginia	2	3	NaSARRI	2020A	R8	13		0.54	0.354265	94.6167	0.182051	43.4098	-15.8755	22.1791	-352.104	0.864201	-10.9203	26.8108	-292.781	-0.384458	0.606393	0.496062	18.1946	30.6	5		15	2
RedBeauty	Valencia	2	3	NaSARRI	2020A	R8	7		0.48	0.367607	47.7461	0.0730878	40.6619	-3.3061	11.2909	-37.3287	0.552172	1.25541	13.3926	16.8132	-1.03888	0.231496	0.15669	32.314	34.8	7		43	3
ICGV 9555	Spanish	2	3	NaSARRI	2020A	R8	12		0.46	0.388367	44.0488	0.0690475	42.7502	-3.03026	11.3435	-34.3739	0.524303	1.68873	13.6206	23.0015	-1.10652	0.20464	0.141553	30.8283	36.4	7		33	2
ICGV-SM 95526	Valencia	2	3	NaSARRI	2020A	R8	10		0.43	0.380183	63.9122	0.115852	43.0887	-5.98083	15.4313	-92.2919	0.622951	-0.473629	18.4613	-8.74382	-0.852156	0.288778	0.195659	32.2458	35.5	7		10	2
ICGV 01504	Spanish	2	3	NaSARRI	2020A	R8	11		0.53	0.375661	55.8574	0.111598	42.2912	-4.72088	14.6485	-69.1536	0.561714	0.871905	17.3256	15.1062	-0.985322	0.269042	0.176604	34.3584	35.1	7		18	2
SGV 0080	Virginia	2	3	NaSARRI	2020A	R8	10		0.42	0.392145	65.7822	0.100668	44.1649	-5.97913	14.6254	-87.4474	0.646079	-0.800513	17.7813	-14.2342	-0.816104	0.299637	0.221594	26.0461	37.7	5		20	2
ICGV-SM 01709	Virginia	2	3	NaSARRI	2020A	R8	7		0.62	0.386279	83.1342	0.090407	43.8652	-8.03948	14.3243	-115.16	0.773801	-3.68289	17.7943	-65.5344	-0.58332	0.380697	0.303956	20.1578	37.1	5		43	3
SGV 0075	Virginia	2	3	NaSARRI	2020A	R8	7		0.69	0.396145	89.8082	0.130396	46.3441	-12.0867	18.7634	-226.788	0.821767	-7.2848	23.4327	-170.703	-0.477589	0.456766	0.365903	19.8929	36.8	5		14	2
Serenut 5R	Virginia	2	4	NaSARRI	2020A	R8	6		0.39	0.410281	69.9799	0.0966535	46.1638	-6.64563	14.9632	-99.4401	0.67634	-1.53789	18.5147	-28.4736	-0.7589	0.311984	0.253571	18.723	38	5		50	3
SGV 0084	Virginia	2	4	NaSARRI	2020A	R8	11		0.53	0.360648	87.9935	0.150329	42.7502	-11.9136	19.0088	-226.463	0.809061	-6.90348	22.9966	-158.757	-0.48845	0.457911	0.370823	19.0185	33.3	6		18	2
ICGV-SM 96714	Valencia	2	4	NaSARRI	2020A	R8	10		0.53	0.377947	65.9574	0.101651	42.6488	-5.86549	14.3151	-83.9649	0.648283	-0.797644	17.2374	-13.7493	-0.811123	0.29225	0.227257	22.239	36.8	7		70	4
ICGV 01515	Spanish	2	4	NaSARRI	2020A	R8	14		0.38	0.374335	54.5294	0.0897608	41.7773	-4.25472	12.899	-54.8815	0.578915	0.727673	15.3733	11.1867	-0.965188	0.234275	0.189083	19.2902	34.4	7		43	3
Acholi White	Valencia	2	4	NaSARRI	2020A	R8	8		0.47	0.373375	66.0359	0.0976253	42.0801	-5.7299	13.8561	-79.3942	0.653831	-0.818759	16.6645	-13.6442	-0.803199	0.281549	0.225964	19.7428	33.7	6		50	3
ICGV 01514	Spanish	2	4	NaSARRI	2020A	R8	11		0.44	0.380382	57.7873	0.0668938	42.1366	-4.24285	11.3646	-48.2183	0.631385	0.0650795	13.7932	0.897652	-0.873042	0.26522	0.215961	18.5731	33.4	7		27	2
Serenut 14R	Virginia	2	4	NaSARRI	2020A	R8
ICGV-SM 95714	Valencia	2	4	NaSARRI	2020A	R8	8		0.5	0.380663	53.6308	0.0866631	42.3938	-4.18383	12.798	-53.5446	0.576564	0.78881	15.3297	12.0922	-0.972821	0.231562	0.184432	20.3533	39.1	6		75	4
ICGV-SM 01731	Virginia	2	4	NaSARRI	2020A	R8	7		0.55	0.358552	85.354	0.117424	41.5433	-9.40528	15.9305	-149.831	0.790202	-4.79827	19.3331	-92.7652	-0.538562	0.389363	0.316666	18.6707	31.1	5		29	2
B7-30-9-3	Spanish	2	4	NaSARRI	2020A	R8	7		0.34	0.349079	55.1114	0.106562	39.2886	-4.33227	13.4513	-58.2748	0.567758	0.815086	15.6267	12.7371	-0.97661	0.231998	0.17052	26.4994	33.4	6		57	3
JL 24	Spanish	2	5	NaSARRI	2020A	R8	5		0.43	0.385549	87.642	0.0974671	44.1474	-9.2356	15.1833	-140.226	0.805355	-4.90951	18.9367	-92.97	-0.524313	0.40764	0.355724	12.7358	35.3	7		60	3
SGV 0047	Virginia	2	5	NaSARRI	2020A	R8	6		0.53	0.360514	93.543	0.121258	42.3099	-11.576	16.9249	-195.923	0.852584	-7.23949	20.8254	-150.765	-0.433028	0.467992	0.407593	12.9058	32.2	5		33	2
Serenut 6T	Spanish	2	5	NaSARRI	2020A	R8	8		0.55	0.373049	80.0507	0.0841519	42.1694	-7.05342	13.2731	-93.6205	0.75525	-2.81692	16.3039	-45.9269	-0.6206	0.345671	0.297824	13.842	34.9	7		25	2
SGV 0023	Virginia	2	5	NaSARRI	2020A	R8	10		0.54	0.372722	90.643	0.0851744	42.5332	-8.77127	13.8572	-121.546	0.827074	-4.82565	17.2585	-83.2838	-0.495269	0.401843	0.3467	13.7225	34.7	5		20	3
ICGV-SM 16501	Spanish	2	5	NaSARRI	2020A	R8	8		0.5	0.354382	91.6403	0.143321	42.0942	-12.3621	18.4711	-228.342	0.839508	-7.66861	22.4332	-172.032	-0.442566	0.478479	0.400121	16.3764	33.4	7		25	2
ICGV-SM 16520	Spanish	2	5	NaSARRI	2020A	R8	11		0.45	0.370561	84.9618	0.119807	42.929	-9.6869	16.5169	-159.998	0.785691	-4.95016	20.1911	-99.9491	-0.544768	0.424371	0.354366	16.4963	29.8	7		45	3
SGV 10005	Spanish	2	5	NaSARRI	2020A	R8	5		0.53	0.358666	91.2212	0.113602	41.7535	-10.4455	15.989	-167.013	0.834387	-6.12724	19.6062	-120.132	-0.466792	0.441807	0.384217	13.0351	33.8	7		80	4
Serenut 7T	Virginia	2	5	NaSARRI	2020A	R8	5		0.7	0.345725	98.0501	0.161433	42.1131	-15.3739	20.3625	-313.052	0.891427	-10.8484	24.7537	-268.539	-0.352583	0.614636	0.52145	15.1612	33.4	5		20	2
ICGV 02501	Spanish	2	5	NaSARRI	2020A	R8	12		0.61	0.340544	97.5556	0.230889	43.54	-19.8797	26.0824	-518.511	0.889214	-14.7806	31.0108	-458.357	-0.325492	0.734621	0.605475	17.58	29.1	6		0	1
SGV 07010	Virginia	2	5	NaSARRI	2020A	R8	9		0.71	0.375934	98.0695	0.186776	46.4786	-18.4123	24.159	-444.824	0.89106	-13.643	29.7872	-406.386	-0.340854	0.691354	0.582215	15.7862	32.1	5		33	2
SGV 10010 ER	Spanish	1	1	Nakabango	2020A	R8	10		0.63	0.377194	36.9284	0.35383	44.4791	2.90518	30.6447	89.0283	-0.132582	18.1802	30.611	556.515	-3.55834	0.270184	0.148978	44.8606	27.8	5		0	1
Serenut 14R	Virginia	1	1	Nakabango	2020A	R8	6		0.82	0.379788	49.0052	0.352147	45.9866	-4.12454	32.0475	-132.181	0.27572	8.51899	33.6135	286.353	-1.57629	0.423928	0.321851	24.0787	28.6	4		0	1
DOK 1T	Spanish	1	1	Nakabango	2020A	R8	8		0.66	0.375451	40.7465	0.339972	44.5095	0.298738	30.0277	8.97041	0.0456418	14.1034	30.6841	432.75	-2.49065	0.308563	0.171	44.5819	29.7	6		0	1
ICGV SM 03590	Spanish	1	1	Nakabango	2020A	R8	5		0.84	0.392369	52.6545	0.336696	47.5463	-6.01217	32.166	-193.388	0.357963	5.99588	34.5776	207.323	-1.33777	0.440819	0.332304	24.6166	26.6	4		0	1
ICGV 02501	Spanish	1	1	Nakabango	2020A	R8	8		0.57	0.371928	41.2627	0.337906	44.1298	-0.0378642	29.7137	-1.12508	0.0674999	13.4492	30.3931	408.762	-2.38757	0.299123	0.156114	47.8094	31.3	6		13	2
SGV 0080	Virginia	1	1	Nakabango	2020A	R8	6		0.76	0.371998	56.8421	0.318111	45.2422	-7.39492	29.916	-221.226	0.438252	3.09087	32.3626	100.029	-1.13814	0.475822	0.357498	24.8673	27.7	5		0	1
JL 24	Spanish	1	1	Nakabango	2020A	R8	5		0.79	0.382077	34.6125	0.330034	44.5095	3.92223	29.0385	113.895	-0.223786	19.1295	29.1541	557.703	-4.28892	0.238799	0.144262	39.5885	28.4	5		20	2
Acholi White	Valencia	1	1	Nakabango	2020A	R8	6		0.76	0.36597	40.5764	0.348776	43.5176	0.520604	29.9912	15.6135	0.0314661	14.2779	30.3056	432.701	-2.55956	0.286125	0.157339	45.0104	28.1	6		33	2
ICGV-SM 16502	Spanish	1	1	Nakabango	2020A	R8	13		0.48	0.380681	34.2647	0.296269	43.9448	3.27244	26.6004	87.0483	-0.186817	17.1621	27.1571	466.072	-3.93989	0.183248	0.0697857	61.9173	32.4	9		8	2
SGV 0060	Virginia	1	1	Nakabango	2020A	R8	7		0.8	0.379332	58.0295	0.344687	46.6409	-8.25579	32.4272	-267.712	0.444103	2.79526	34.9462	97.6839	-1.10831	0.482398	0.32179	33.2936	28.6	5		14	2
SGV 0075	Virginia	1	2	Nakabango	2020A	R8	12		0.8	0.3976	59.35	0.320543	48.4611	-8.82583	31.9639	-282.108	0.470251	1.98221	35.2581	69.8889	-1.05731	0.518161	0.378545	26.9445	25.8	5		17	2
ICGV 01502	Spanish	1	2	Nakabango	2020A	R8	11		0.61	0.371796	31.3371	0.336923	43.0887	6.19904	28.5186	176.788	-0.445896	22.1282	27.855	616.382	-7.28178	0.188867	0.0997439	47.1882	29.6	6		55	3
SGV 07010	Virginia	1	2	Nakabango	2020A	R8	4		0.81	0.392555	38.9812	0.332959	46.172	1.3039	30.399	39.6374	-0.0201961	15.9524	31.264	498.737	-2.83336	0.318798	0.228164	28.4299	28.2	4		0	1
Serenut 5R	Virginia	1	2	Nakabango	2020A	R8	5		0.76	0.390742	36.7721	0.320628	45.5915	2.39587	29.1643	69.874	-0.100537	17.0522	29.8813	509.542	-3.32151	0.285921	0.185291	35.1948	29.6	5		0	1
12CS-015	Spanish	1	2	Nakabango	2020A	R8	9		0.55	0.383401	29.8862	0.327041	44.1254	7.07502	28.3619	200.661	-0.545165	23.5788	27.8426	656.497	-9.57889	0.160173	0.0601668	62.4363	30.3	7		67	4
DOK 1R	Spanish	1	2	Nakabango	2020A	R8	6		0.52	0.403454	29.5548	0.300882	46.032	6.64556	27.6593	183.812	-0.512912	22.9642	27.8735	640.092	-8.43368	0.16804	0.0887437	47.189	28.9	6		0	1
B7-30-9-3	Spanish	1	2	Nakabango	2020A	R8	8		0.62	0.358563	38.4394	0.337237	42.3192	1.54001	28.5162	43.9153	-0.0386052	15.084	28.5913	431.271	-2.94164	0.262998	0.145829	44.5514	31.7	7		50	3
ICGV-SM 08556	Spanish	1	2	Nakabango	2020A	R8	12		0.43	0.362722	28.9859	0.298637	41.4616	6.34469	25.1879	159.809	-0.538693	20.7959	24.7146	513.964	-9.04933	0.125589	0.0514191	59.0576	29.8	8		17	2
Serenut 7T	Virginia	1	2	Nakabango	2020A	R8	6		0.78	0.381806	47.956	0.309742	45.4993	-3.68831	29.0739	-107.234	0.277725	8.0951	31.0241	251.144	-1.59301	0.398691	0.297583	25.3598	27.7	4		0	1
ICGV-SM 01709	Virginia	1	2	Nakabango	2020A	R8	5		0.77	0.391715	43.8118	0.298777	46.1021	-1.82248	28.4327	-51.818	0.180609	10.6293	30.2894	321.954	-1.93216	0.35089	0.264203	24.705	26.4	4		0	1
ICGV-SM 95526	Valencia	1	3	Nakabango	2020A	R8	10		0.73	0.373429	41.9606	0.374863	44.8459	0.0554475	32.3896	1.79592	0.0566718	14.5949	32.6426	476.415	-2.42746	0.312354	0.15475	50.4571	28.6	6		30	2
ICGV-SM 95355	Virginia	1	3	Nakabango	2020A	R8	5		0.77	0.38168	40.5964	0.319817	44.9444	0.128924	29.0067	3.73966	0.0583092	13.5513	30.0386	407.063	-2.43549	0.336142	0.230781	31.344	26.8	5		20	2
Serenut 6T	Spanish	1	3	Nakabango	2020A	R8	6		0.57	0.39615	26.4033	0.317406	45.0596	9.51006	28.0419	266.68	-0.871403	27.3639	27.3202	747.587	-56.133	0.135139	0.0575799	57.3921	28.7	6		83	4
ICGV-SM 16520	Spanish	1	3	Nakabango	2020A	R8	13		0.45	0.380415	24.7416	0.300323	43.0067	9.63565	25.8068	248.665	-1.00583	26.2794	24.9322	655.202	144.606	0.104199	0.035703	65.7358	28.5	8		77	4
ICGV 01504	Spanish	1	3	Nakabango	2020A	R8	10		0.44	0.371456	25.3063	0.302686	42.1037	9.14924	25.5276	233.558	-0.937862	25.259	24.5745	620.728	-154.754	0.112201	0.0519622	53.6885	31.2	8		120	4
SGV 0805	Valencia	1	3	Nakabango	2020A	R8	8		0.57	0.374345	32.6167	0.312276	43.2519	4.61428	27.1585	125.317	-0.307021	19.266	27.1516	523.101	-5.11136	0.208472	0.127976	38.6123	28	6		63	3
ICGV-SM 01731	Virginia	1	3	Nakabango	2020A	R8	6		0.78	0.401349	45.2328	0.28502	47.1188	-2.63668	28.1215	-74.1474	0.229023	9.43616	30.4629	287.453	-1.76599	0.375298	0.276302	26.378	25.2	5		0	1
ICGV-SM 95714	Valencia	1	3	Nakabango	2020A	R8	14		0.47	0.368742	33.9087	0.316984	42.8007	3.89866	27.2885	106.389	-0.237694	18.1815	27.2794	495.981	-4.40298	0.197454	0.0803763	59.2937	30.8	7		43	3
Serenut 11T	Virginia	1	3	Nakabango	2020A	R8	8		0.77	0.368879	62.2507	0.312229	45.1955	-9.27761	29.7789	-276.277	0.513156	0.417231	32.6054	13.604	-0.964881	0.512245	0.369848	27.7987	26.6	5		0	1
Serenut 8R	Virginia	1	3	Nakabango	2020A	R8	4		0.78	0.371108	40.6188	0.29042	43.3918	-0.330272	26.358	-8.70531	0.096089	11.7339	27.5406	323.16	-2.27734	0.317606	0.237292	25.2873	25.9	4		0	1
ICGV-SM 99568	Spanish	1	4	Nakabango	2020A	R8	5		0.69	0.383728	31.9375	0.35438	44.6738	6.49317	30.518	198.159	-0.439018	23.5967	29.813	703.487	-7.26269	0.214115	0.113982	46.766	29.7	6		40	2
ICGV-SM 88710	Virginia	1	4	Nakabango	2020A	R8	5		0.59	0.386674	30.3642	0.31941	44.4617	6.51933	28.1044	183.222	-0.488759	22.6913	27.8474	631.895	-8.04702	0.223594	0.168711	24.5461	27.9	4		20	2
SGV 0071	Virginia	1	4	Nakabango	2020A	R8	12		0.77	0.391706	65.6748	0.324888	48.4037	-11.3478	32.5459	-369.324	0.55009	-1.3929	36.206	-50.4313	-0.876012	0.567067	0.431729	23.8662	26	5		8	2
SGV 0084	Virginia	1	4	Nakabango	2020A	R8	8		0.81	0.343337	54.2835	0.346633	42.1084	-6.17075	29.7237	-183.417	0.388717	4.47088	30.9908	138.556	-1.25225	0.454901	0.353707	22.2452	28.4	5		25	2
ICGV 01514	Spanish	1	4	Nakabango	2020A	R8	14		0.68	0.370366	43.1033	0.319744	43.8962	-1.22677	28.5743	-35.054	0.14459	11.293	29.6652	335.009	-2.06266	0.320039	0.192382	39.8879	30.5	6		14	2
RedBeauty	Valencia	1	4	Nakabango	2020A	R8	10		0.44	0.350285	29.0331	0.328844	40.3586	7.15631	26.4131	189.02	-0.607828	22.2826	25.2231	562.036	-11.8017	0.153241	0.0774358	49.468	33	7		70	4
ICGV-SM 03702	Virginia	1	4	Nakabango	2020A	R8	5		0.74	0.352782	37.5326	0.305762	41.225	1.43374	26.0078	37.2883	-0.0339202	13.8788	26.3133	365.197	-2.91728	0.286502	0.212448	25.8477	27.7	4		0	1
SGV 0023	Virginia	1	4	Nakabango	2020A	R8	10		0.77	0.400945	56.1658	0.29826	48.1924	-7.35217	30.1731	-221.838	0.433594	3.46331	33.4199	115.744	-1.15915	0.474385	0.34157	27.9974	26.8	5		0	1
SGV 990400	Virginia	1	4	Nakabango	2020A	R8	7		0.82	0.360697	50.5001	0.315688	43.3783	-4.66565	28.4328	-132.658	0.332311	6.27828	30.0852	188.883	-1.42555	0.414019	0.3135	24.2787	25.5	5		0	1
ICGV-SM 16501	Spanish	1	4	Nakabango	2020A	R8	11		0.62	0.367829	43.4476	0.345515	43.9713	-1.14685	30.1919	-34.6256	0.132773	11.9752	30.9421	370.537	-2.09934	0.302058	0.149885	50.3787	30.4	6		36	2
ICGVS-SM 0205	Spanish	1	5	Nakabango	2020A	R8	7		0.46	0.355296	22.7675	0.346659	40.4335	12.7513	27.1819	346.604	-1.52311	31.1017	24.6508	766.681	10.0447	0.086953	0.0318494	63.3718	34.5	8		100	5
ICGV 9555	Spanish	1	5	Nakabango	2020A	R8	10		0.64	0.363268	37.3626	0.33616	42.7318	2.20299	28.6056	63.0178	-0.0878012	16.148	28.649	462.623	-3.24398	0.254935	0.145901	42.7691	28.9	7		30	2
SGV 10005	Spanish	1	5	Nakabango	2020A	R8	7		0.6	0.368012	27.0609	0.274235	41.6486	6.71579	23.6634	158.919	-0.636942	20.7692	23.4185	486.383	-11.8346	0.169536	0.0892105	47.3796	30.2	7		14	2
ICGV 01515	Spanish	1	5	Nakabango	2020A	R8	13		0.57	0.362268	34.1684	0.335821	42.3005	4.13982	28.1872	116.69	-0.25071	18.7906	27.7956	522.295	-4.55633	0.224626	0.120055	46.5532	29.8	7		38	3
Serenut 4T	Spanish	1	5	Nakabango	2020A	R8	9		0.45	0.357591	25.9174	0.344764	41.006	10.1865	27.5455	280.592	-1.00076	27.4201	25.6471	703.246	67.3517	0.123701	0.0539068	56.4218	31.6	8		100	5
ICGV 01510	Spanish	1	5	Nakabango	2020A	R8	13		0.42	0.360515	31.1284	0.315216	41.5864	5.47149	26.385	144.365	-0.408104	19.9806	25.895	517.396	-6.49013	0.174366	0.0874604	49.841	29.3	8		46	3
Serenut 9T	Virginia	1	5	Nakabango	2020A	R8	8		0.8	0.368408	61.0912	0.328674	45.3351	-9.09644	30.8227	-280.377	0.493483	1.00993	33.4432	33.7754	-1.00059	0.530958	0.388389	26.8513	26.3	5		0	1
ICGV-SM 96714	Valencia	1	5	Nakabango	2020A	R8	10		0.52	0.372735	34.864	0.340132	43.5981	3.92822	29.2009	114.708	-0.22291	19.0536	29.0137	552.814	-4.29441	0.206209	0.0984657	52.2497	26.1	7		20	2
SGV 0065	Virginia	1	5	Nakabango	2020A	R8	7		0.76	0.373407	53.729	0.338317	45.4699	-6.28836	31.1421	-195.833	0.379301	5.07073	33.1829	168.261	-1.27966	0.440418	0.287732	34.6686	25.5	5		0	1
SGV 0047	Virginia	1	5	Nakabango	2020A	R8	9		0.79	0.372938	63.7578	0.354067	46.5558	-10.6652	33.2183	-354.279	0.519799	-0.352517	36.003	-12.6917	-0.927587	0.543039	0.390135	28.1571	26	5		0	1
ICGV-SM 03702	Virginia	2	1	Nakabango	2020A	R8	2		0.8	0.380688	32.1717	0.333375	44.1342	5.63048	28.9119	162.788	-0.381401	21.5951	28.5868	617.334	-6.15411	0.241401	0.169486	29.7906	27.5	4		0	1
Serenut 4T	Spanish	2	1	Nakabango	2020A	R8	10		0.39	0.377635	24.8643	0.335718	43.034	11.1319	28.0482	312.231	-1.13103	29.4941	26.4175	779.16	26.4437	0.101116	0.0383637	62.0598	32.6	9		80	4
ICGV-SM 99568	Spanish	2	1	Nakabango	2020A	R8	10		0.54	0.366016	34.2879	0.340903	42.787	4.24573	28.7625	122.118	-0.254401	19.2365	28.3649	545.641	-4.60104	0.229353	0.124377	45.7706	31.1	7		30	3
ICGV SM 03590	Spanish	2	1	Nakabango	2020A	R8	3		0.78	0.362003	30.76	0.349238	42.0519	6.85747	28.6403	196.4	-0.5142	22.98	27.5026	632.01	-8.96006	0.211284	0.14664	30.5956	25.5	4		33	2
12CS-015	Spanish	2	1	Nakabango	2020A	R8	9		0.59	0.365907	37.1661	0.353445	43.2157	2.66558	29.921	79.757	-0.117895	17.3692	29.7151	516.128	-3.45308	0.24253	0.107699	55.5935	29.9	8		22	2
ICGV-SM 16502	Spanish	2	1	Nakabango	2020A	R8	11		0.5	0.379988	29.509	0.33011	43.7408	7.38039	28.3357	209.128	-0.581216	23.9666	27.6486	662.642	-10.8105	0.146369	0.0545224	62.7501	30.4	8		45	3
SGV 0805	Valencia	2	1	Nakabango	2020A	R8	6		0.49	0.355484	28.0952	0.345581	41.006	8.50557	27.7085	235.677	-0.743016	24.9235	26.1289	651.224	-22.6952	0.141474	0.0565853	60.0031	31.8	6		50	3
Serenut 9T	Virginia	2	1	Nakabango	2020A	R8	9		0.83	0.372529	65.0357	0.327679	46.1392	-10.7216	31.42	-336.873	0.543403	-1.0076	34.4826	-34.7446	-0.889965	0.572104	0.447245	21.8245	30.3	4		0	1
ICGV-SM 08556	Spanish	2	1	Nakabango	2020A	R8	11		0.55	0.357917	29.6912	0.321714	41.2153	6.57602	26.5034	174.287	-0.532893	21.606	25.6572	554.349	-9.15898	0.1584	0.0780603	50.7194	30.7	8		0	1
Serenut 11T	Virginia	2	1	Nakabango	2020A	R8	4		0.8	0.375295	37.3247	0.338131	44.1166	2.3459	29.4981	69.1995	-0.0956161	16.8843	29.7295	501.96	-3.29455	0.273315	0.190657	30.2427	29.9	4		0	1
ICGV 01502	Spanish	2	2	Nakabango	2020A	R8	10		0.43	0.352825	24.6278	0.33132	40.2183	10.4764	26.2525	275.03	-1.12974	27.1958	24.3618	662.539	27.5673	0.104006	0.0480996	53.7529	35.6	8		80	4
SGV 990400	Virginia	2	2	Nakabango	2020A	R8	5		0.82	0.361752	50.0483	0.34409	43.8696	-4.48838	30.3981	-136.438	0.305874	7.22783	31.7423	229.428	-1.48818	0.428804	0.312836	27.0444	29	4		20	2
SGV 0071	Virginia	2	2	Nakabango	2020A	R8	6		0.79	0.382706	43.7612	0.343179	45.6793	-1.37435	31.041	-42.6612	0.142111	12.1509	32.1757	390.962	-2.06073	0.368208	0.264285	28.224	27	5		33	2
ICGV 01510	Spanish	2	2	Nakabango	2020A	R8	15		0.43	0.373302	29.79	0.325123	42.9747	6.91403	27.633	191.055	-0.544595	22.8542	26.9745	616.481	-9.53626	0.162606	0.0793372	51.2088	31.1	8		27	2
ICGV-SM 95355	Virginia	2	2	Nakabango	2020A	R8	5		0.81	0.375332	33.6038	0.334086	43.6963	4.60324	28.803	132.587	-0.285974	19.9348	28.5902	569.939	-4.92211	0.260823	0.193661	25.75	27.6	5		20	2
DOK 1R	Spanish	2	2	Nakabango	2020A	R8	8		0.47	0.367432	36.6789	0.311788	42.865	2.11548	27.1628	57.4624	-0.0856501	15.5175	27.5618	427.69	-3.22589	0.234949	0.121031	48.4865	30.5	7		0	1
ICGVS-SM 0205	Spanish	2	2	Nakabango	2020A	R8	6		0.64	0.359852	35.0533	0.319511	41.9386	3.18066	27.0535	86.0478	-0.175345	16.9043	26.9965	456.357	-3.86769	0.225737	0.108723	51.8365	24.9	7		50	3
Serenut 8R	Virginia	2	2	Nakabango	2020A	R8	4		0.75	0.353633	35.8991	0.321479	41.3412	2.65651	26.9085	71.4826	-0.131199	15.995	26.8176	428.949	-3.53667	0.277007	0.203499	26.5366	27.8	4		25	2
SGV 10010 ER	Spanish	2	2	Nakabango	2020A	R8	9		0.58	0.378109	36.0403	0.312067	44.0066	2.57819	27.7431	71.5272	-0.120634	16.5736	28.2526	468.246	-3.45658	0.261101	0.160045	38.7035	26.1	6		22	2
SGV 0060	Virginia	2	2	Nakabango	2020A	R8	7		0.78	0.386662	53.0629	0.320943	46.6732	-6.05908	30.6879	-185.941	0.37402	5.35823	33.1451	177.599	-1.30279	0.451089	0.316408	29.8569	26	6		0	1
DOK 1T	Spanish	2	3	Nakabango	2020A	R8	4		0.6	0.356402	29.103	0.360276	41.3557	8.32938	28.8215	240.065	-0.682052	25.1405	27.1149	681.683	-17.2322	0.175846	0.0977178	44.4297	29.8	5		0	1
ICGV-SM 88710	Virginia	2	3	Nakabango	2020A	R8	8		0.76	0.364572	34.788	0.358956	42.8741	4.34804	29.9148	130.071	-0.252047	19.8163	29.2524	579.675	-4.60598	0.26783	0.187601	29.9551	27.8	5		50	3
SGV 0065	Virginia	2	3	Nakabango	2020A	R8	8		0.76	0.368301	53.1038	0.370898	45.3225	-6.09072	32.9953	-200.965	0.353775	5.92343	34.5109	204.423	-1.3328	0.458894	0.299829	34.6626	27.5	5		13	2
RedBeauty	Valencia	2	3	Nakabango	2020A	R8	13		0.41	0.36	27.149	0.356119	41.5097	9.77032	28.5606	279.047	-0.886326	27.2744	26.6581	727.084	-137.976	0.111329	0.040101	63.9797	31.1	8		92	5
ICGV 9555	Spanish	2	3	Nakabango	2020A	R8	12		0.44	0.361743	27.7844	0.353397	41.7488	9.17973	28.5669	262.236	-0.80244	26.4219	26.8617	709.736	-36.3117	0.129367	0.0557968	56.8695	33.5	8		42	3
ICGV-SM 95526	Valencia	2	3	Nakabango	2020A	R8	12		0.68	0.396986	50.5913	0.385985	48.6629	-5.08452	35.8281	-182.169	0.290343	8.63861	37.5573	324.443	-1.51062	0.390724	0.186067	52.3788	29.9	6		17	2
ICGV 01504	Spanish	2	3	Nakabango	2020A	R8	12		0.57	0.372165	36.4331	0.349186	43.7986	3.12011	29.9398	93.4154	-0.152418	18.1441	29.8149	540.966	-3.70609	0.220268	0.0901453	59.0748	31.9	7		17	2
SGV 0080	Virginia	2	3	Nakabango	2020A	R8	11		0.77	0.364819	64.478	0.356546	45.7002	-10.8651	32.9004	-357.466	0.5301	-0.784802	35.5124	-27.8702	-0.904293	0.548617	0.377189	31.2474	26.6	5		9	2
ICGV-SM 01709	Virginia	2	3	Nakabango	2020A	R8	6		0.81	0.402219	52.4859	0.340148	48.7199	-6.04496	33.0382	-199.715	0.351517	6.349	35.6355	226.25	-1.35323	0.45426	0.323665	28.7489	25.3	5		0	1
SGV 0075	Virginia	2	3	Nakabango	2020A	R8	9		0.79	0.366928	55.2536	0.329257	44.6997	-6.78746	30.2232	-205.139	0.409751	3.99966	32.3214	129.275	-1.2046	0.462328	0.329721	28.6824	26.8	5		11	2
Serenut 5R	Virginia	2	4	Nakabango	2020A	R8	5		0.69	0.369455	34.7565	0.347701	43.3016	4.13644	29.4803	121.943	-0.238115	19.4171	29.0973	564.986	-4.44887	0.268552	0.184737	31.2101	27.7	5		0	1
SGV 0084	Virginia	2	4	Nakabango	2020A	R8	7		0.72	0.350237	40.7312	0.362328	41.8818	0.570685	29.8448	17.032	0.0283619	14.0632	29.6643	417.174	-2.57377	0.338099	0.249401	26.2343	25.8	5		14	2
ICGV-SM 96714	Valencia	2	4	Nakabango	2020A	R8	8		0.51	0.359818	25.5818	0.353092	41.2977	10.8373	28.1951	305.56	-1.07174	28.7305	26.0884	749.532	32.7739	0.128214	0.0628415	50.987	29.7	7		88	4
ICGV 01515	Spanish	2	4	Nakabango	2020A	R8	10		0.41	0.355343	23.2628	0.33737	40.4135	11.883	26.6381	316.539	-1.38152	29.5421	24.4157	721.29	12.834	0.114665	0.0629165	45.1302	32.2	8		80	4
Acholi White	Valencia	2	4	Nakabango	2020A	R8	6		0.59	0.377592	27.4057	0.335625	43.3016	9.12852	28.3304	258.615	-0.804727	26.5601	27.1464	721.013	-33.2261	0.145502	0.0676427	53.5108	31.4	6		67	3
ICGV 01514	Spanish	2	4	Nakabango	2020A	R8	12		0.65	0.357725	33.5465	0.333883	41.7011	4.44258	27.7023	123.07	-0.28381	18.9642	27.1789	515.425	-4.89904	0.221487	0.141534	36.0982	29.8	6		33	2
Serenut 14R	Virginia	2	4	Nakabango	2020A	R8	7		0.84	0.362955	42.9565	0.322614	43.0705	-1.10318	28.2911	-31.2101	0.138393	11.2727	29.1736	328.865	-2.087	0.344459	0.261882	23.9732	27.4	4		0	1
ICGV-SM 95714	Valencia	2	4	Nakabango	2020A	R8	8		0.65	0.394435	40.9133	0.331043	46.5599	0.122356	30.6013	3.74425	0.0557606	14.3191	31.7843	455.123	-2.44262	0.308549	0.17845	42.1647	28.5	6		25	2
ICGV-SM 01731	Virginia	2	4	Nakabango	2020A	R8	3		0.79	0.333392	36.3918	0.34724	39.3353	2.78369	27.2988	75.9915	-0.139815	16.0051	26.4926	424.016	-3.6124	0.264842	0.18314	30.8496	25.9	4		0	1
B7-30-9-3	Spanish	2	4	Nakabango	2020A	R8	8		0.63	0.365694	36.5195	0.339217	42.961	2.78465	28.8777	80.4144	-0.131742	17.1372	28.8095	493.713	-3.54683	0.236315	0.109398	53.7066	33	7		75	4
JL 24	Spanish	2	5	Nakabango	2020A	R8	4		0.32	0.369698	18.8102	0.28559	41.1279	13.0339	23.5978	307.571	-2.08129	30.2099	21.921	662.232	7.01495	0.0577834	0.0298335	48.3701	28.6	7		100	5
SGV 0047	Virginia	2	5	Nakabango	2020A	R8	10		0.74	0.359449	37.8368	0.34601	42.4636	2.04579	29.0802	59.4918	-0.0746075	16.0438	28.967	464.739	-3.16096	0.294967	0.204525	30.6616	27.1	6		40	2
Serenut 6T	Spanish	2	5	Nakabango	2020A	R8	6		0.28	0.36946	22.1299	0.364616	42.099	14.6748	29.1707	428.074	-1.76496	35.2919	26.2244	925.511	7.50127	0.0744521	0.0330474	55.6125	31	8		50	3
SGV 0023	Virginia	2	5	Nakabango	2020A	R8	9		0.72	0.360002	50.0628	0.352696	43.7897	-4.48087	30.8639	-138.297	0.301604	7.38034	32.0719	236.702	-1.49669	0.43359	0.317911	26.6793	25.9	5		0	1
ICGV-SM 16501	Spanish	2	5	Nakabango	2020A	R8	8		0.36	0.35955	19.1361	0.264985	39.9101	11.3261	21.7895	246.791	-1.80159	26.5817	20.4786	544.356	9.02592	0.062128	0.0287423	53.737	37.7	9		100	5
ICGV-SM 16520	Spanish	2	5	Nakabango	2020A	R8	12		0.4	0.352188	25.4455	0.324821	40.173	9.59235	25.8824	248.273	-0.993905	25.7007	24.2471	623.168	107.916	0.11532	0.0457722	60.3086	33.2	8		67	4
SGV 10005	Spanish	2	5	Nakabango	2020A	R8	9		0.5	0.35636	30.4174	0.31691	41.0695	5.92897	26.1738	155.184	-0.464017	20.4925	25.4891	522.335	-7.50108	0.184509	0.101813	44.8195	28.3	8		44	3
Serenut 7T	Virginia	2	5	Nakabango	2020A	R8	4		0.84	0.388236	49.9253	0.320331	46.568	-4.64247	30.4249	-141.247	0.312885	7.29215	32.6185	237.859	-1.47801	0.420691	0.311491	25.9573	28.2	0		25	4
ICGV 02501	Spanish	2	5	Nakabango	2020A	R8	9		0.63	0.361599	47.7373	0.339447	43.5803	-3.39955	29.8533	-101.488	0.256887	8.56913	31.0128	265.753	-1.64573	0.367912	0.224074	39.0959	27.5	6		11	2
SGV 07010	Virginia	2	5	Nakabango	2020A	R8	7		0.8	0.362397	48.8068	0.324112	43.5489	-3.91964	28.951	-113.477	0.290496	7.52448	30.4004	228.747	-1.54653	0.407429	0.298209	26.8072	24.9	5		0	1
SGV 10010 ER	Spanish	1	1	NaSARRI	2020B	R2	12	9	0.59	0.396776	44.2055	0.2794	46.4379	-2.15907	27.3495	-59.0494	0.207094	9.77885	29.5347	288.816	-1.84591	0.231126	0.197524	14.5384		2	0	0
Serenut 14R	Virginia	1	1	NaSARRI	2020B	R2	8	11	0.7	0.40849	40.1204	0.27801	47.357	-0.204754	27.4474	-5.61996	0.0840952	12.7703	29.4547	376.144	-2.33114	0.177562	0.150173	15.425		1	0	0
DOK 1T	Spanish	1	1	NaSARRI	2020B	R2	6	11	0.55	0.416971	36.8045	0.277549	47.9759	1.5795	27.4932	43.4256	-0.0430636	15.5076	29.2804	454.068	-2.9641	0.122189	0.0964803	21.0403		1	0	0
ICGV SM 03590	Spanish	1	1	NaSARRI	2020B	R2	0
ICGV 02501	Spanish	1	1	NaSARRI	2020B	R2	13	11.5	0.43	0.411606	42.0419	0.293132	48.0844	-1.00355	28.97	-29.0729	0.129372	12.2433	31.1007	380.774	-2.1324	0.177166	0.13364	24.568		1	0	0
SGV 0080	Virginia	1	1	NaSARRI	2020B	R2	3	7.5	0.28	0.442646	25.2609	0.197843	48.8258	5.44672	21.3584	116.333	-0.525874	18.8197	23.043	433.662	-7.82314	0.0241102	0.0163266	32.2836		1	0	0
JL 24	Spanish	1	1	NaSARRI	2020B	R2	6	9.5	0.44	0.41038	35.787	0.287111	47.2659	2.37317	27.7429	65.8388	-0.104148	16.7053	29.154	487.028	-3.3356	0.100315	0.0787891	21.4583		1	0	0
Acholi White	Valencia	1	1	NaSARRI	2020B	R2	15	13	0.67	0.424284	44.8242	0.301212	49.8743	-2.41785	30.6123	-74.016	0.200872	10.9457	33.2492	363.937	-1.85359	0.221932	0.179914	18.9327		1	0	0
ICGV-SM 16502	Spanish	1	1	NaSARRI	2020B	R2	14	14.5	0.61	0.424266	43.7844	0.307827	49.867	-1.80991	30.9917	-56.092	0.166259	11.9857	33.4387	400.786	-1.97855	0.214773	0.180054	16.1653		1	0	0
SGV 0060	Virginia	1	1	NaSARRI	2020B	R2	12	11	0.63	0.454383	40.769	0.287822	52.5826	-0.378807	30.7564	-11.6507	0.0858128	14.3459	33.6507	482.752	-2.31456	0.176368	0.140836	20.1468		2	0	0
SGV 0075	Virginia	1	2	NaSARRI	2020B	R2	13	9.5	0.46	0.431287	38.646	0.294447	49.9401	0.925666	29.7789	27.5653	0.00497998	15.6419	31.8676	498.47	-2.70002	0.155929	0.122319	21.5545		2	0	0
ICGV 01502	Spanish	1	2	NaSARRI	2020B	R2	8	11	0.5	0.437142	31.8384	0.207388	48.8975	2.41659	22.5704	54.5434	-0.133933	14.8248	24.8353	368.179	-3.51123	0.106621	0.0838968	21.3129		1	0	0
SGV 07010	Virginia	1	2	NaSARRI	2020B	R2	15	7.5	0.47	0.439826	38.0097	0.271125	50.4977	0.864133	28.3364	24.4865	0.00954379	15.0537	30.7708	463.216	-2.68136	0.143131	0.10898	23.8602		2	0	0
Serenut 5R	Virginia	1	2	NaSARRI	2020B	R2	13	9	0.48	0.46961	38.182	0.261227	53.5873	0.634672	29.0432	18.4329	0.0248451	15.3188	32.1635	492.704	-2.60482	0.153214	0.123423	19.4443		1	0	0
12CS-015	Spanish	1	2	NaSARRI	2020B	R2	1	10	0.35	0.462532	26.4649	0.200387	51.032	5.11806	22.4564	114.933	-0.449121	19.0566	24.552	467.877	-6.55972	0.0268841	0.0177854	33.8443		1	0	0
DOK 1R	Spanish	1	2	NaSARRI	2020B	R2	15	11.5	0.58	0.436828	38.2069	0.278181	50.2888	0.854082	28.7477	24.5529	0.0101003	15.1766	31.0825	471.728	-2.67712	0.137517	0.0971213	29.3753		2	0	0
B7-30-9-3	Spanish	1	2	NaSARRI	2020B	R2	14	11.5	0.62	0.460453	42.0155	0.286485	53.3471	-1.09989	31.1071	-34.2144	0.126473	13.47	34.2977	461.99	-2.14258	0.185971	0.14224	23.5149		2	0	0
ICGV-SM 08556	Spanish	1	2	NaSARRI	2020B	R2	15	12.5	0.66	0.476325	43.3248	0.276634	55.0452	-1.96516	31.2723	-61.4552	0.173211	12.3943	35.0412	434.31	-1.9637	0.202691	0.162693	19.7334		1	0	0
Serenut 7T	Virginia	1	2	NaSARRI	2020B	R2	9	9.5	0.5	0.456259	34.7905	0.274255	51.9901	2.88813	29.0387	83.8677	-0.139086	18.5823	31.3163	581.929	-3.56041	0.100441	0.0717558	28.5591		1	1	11.1111
ICGV-SM 01709	Virginia	1	2	NaSARRI	2020B	R2	15	11	0.48	0.439936	42.2901	0.296534	51.282	-1.1079	30.8287	-34.1551	0.127997	13.131	33.533	440.324	-2.13364	0.195522	0.152124	22.1958		1	0	0
ICGV-SM 95526	Valencia	1	3	NaSARRI	2020B	R2	15	11.5	0.57	0.467681	42.2317	0.278379	54.0336	-1.34558	30.8581	-41.5221	0.141285	13.0731	34.3007	448.414	-2.08631	0.203471	0.16323	19.7772		1	0	0
ICGV-SM 95355	Virginia	1	3	NaSARRI	2020B	R2	13	11	0.49	0.433506	37.516	0.283182	49.9182	1.37937	28.883	39.8404	-0.026619	15.9786	30.9994	495.326	-2.86988	0.142475	0.11249	21.0457		2	0	0
Serenut 6T	Spanish	1	3	NaSARRI	2020B	R2	16	11	0.59	0.443803	46.3524	0.299027	52.1511	-3.30843	31.7147	-104.926	0.239204	10.2557	34.9725	358.666	-1.71981	0.252007	0.207302	17.7396		1	0	0
ICGV-SM 16520	Spanish	1	3	NaSARRI	2020B	R2	16	15	0.64	0.430123	49.6943	0.3086	51.1026	-4.86943	32.0616	-156.122	0.309479	7.96481	35.3015	281.17	-1.49158	0.295934	0.249746	15.6076		2	0	0
ICGV 01504	Spanish	1	3	NaSARRI	2020B	R2	14	11.5	0.48	0.446842	44.5987	0.296174	52.2706	-2.41325	31.4696	-75.9439	0.195698	11.5159	34.6094	398.556	-1.87292	0.229602	0.185626	19.1533		2	0	0
SGV 0805	Valencia	1	3	NaSARRI	2020B	R2	16	13.5	0.67	0.455918	50.2575	0.328437	54.3783	-5.3873	35.2901	-190.118	0.306512	8.64017	39.0071	337.028	-1.48715	0.288142	0.229325	20.4126		1	0	0
ICGV-SM 01731	Virginia	1	3	NaSARRI	2020B	R2	3	11.5	0.4	0.456403	28.183	0.214587	50.6803	4.73938	23.5127	111.435	-0.378226	18.918	25.5844	484.006	-5.67441	0.0611067	0.040082	34.4066		1	0	0
ICGV-SM 95714	Valencia	1	3	NaSARRI	2020B	R2	12	14.5	0.64	0.459394	43.1856	0.303511	53.6135	-1.57592	32.5977	-51.3714	0.146469	13.3387	35.7469	476.816	-2.05422	0.202594	0.156886	22.5611		1	0	0
Serenut 11T	Virginia	1	3	NaSARRI	2020B	R2	10	12	0.45	0.435315	44.026	0.293511	50.901	-2.09482	30.5324	-63.9598	0.184067	11.5035	33.3867	384.063	-1.91801	0.233455	0.1837	21.3122		2	0	0
Serenut 8R	Virginia	1	3	NaSARRI	2020B	R2	11	12	0.6	0.475387	44.7697	0.271592	55.0042	-2.78096	30.9579	-86.0927	0.217679	11.0357	34.9232	385.403	-1.80649	0.248742	0.200945	19.2154		1	0	0
ICGV-SM 99568	Spanish	1	4	NaSARRI	2020B	R2	16	12	0.51	0.433108	42.78	0.318458	50.901	-1.13604	32.2291	-36.6135	0.124314	13.5606	34.6088	469.317	-2.13938	0.190853	0.143454	24.8352		2	0	0
ICGV-SM 88710	Virginia	1	4	NaSARRI	2020B	R2	16	13	0.6	0.422806	50.2403	0.317573	50.4798	-5.09188	32.3838	-164.894	0.316662	7.69053	35.4377	272.535	-1.46547	0.291466	0.24213	16.9268		2	0	0
SGV 0071	Virginia	1	4	NaSARRI	2020B	R2	8	9	0.44	0.437608	36.7748	0.283174	50.2924	1.81061	29.0105	52.5266	-0.05749	16.725	31.1115	520.338	-3.04399	0.12055	0.0912505	24.3047		1	0	0
SGV 0084	Virginia	1	4	NaSARRI	2020B	R2	14	10.5	0.53	0.449965	43.1942	0.282724	52.2672	-1.7878	30.3831	-54.3187	0.168087	12.0463	33.5427	404.066	-1.98205	0.203055	0.153671	24.3206		2	0	0
ICGV 01514	Spanish	1	4	NaSARRI	2020B	R2	8	13.5	0.7	0.436815	42.2624	0.291409	50.8655	-1.16811	30.2568	-35.3433	0.133732	12.7813	32.9499	421.142	-2.11309	0.207323	0.166182	19.8441		1	0	0
RedBeauty	Valencia	1	4	NaSARRI	2020B	R2	10	13.5	0.63	0.447424	45.1577	0.296404	52.3896	-2.68764	31.5764	-84.8663	0.209144	11.1565	34.7888	388.12	-1.82465	0.230227	0.176372	23.392		1	0	0
ICGV-SM 03702	Virginia	1	4	NaSARRI	2020B	R2	8	13	0.53	0.446822	34.7165	0.285752	51.1097	3.2013	29.4681	94.3362	-0.161464	19.1263	31.4142	600.838	-3.72823	0.100362	0.0771395	23.1387		1	0	0
SGV 0023	Virginia	1	4	NaSARRI	2020B	R2	8	10.5	0.51	0.428408	36.8544	0.28672	49.3431	1.81561	28.819	52.3242	-0.0582511	16.5432	30.7102	508.044	-3.04959	0.128045	0.097045	24.2101		1	0	0
SGV 990400	Virginia	1	4	NaSARRI	2020B	R2	9	13.5	0.54	0.434069	41.2666	0.290711	50.4546	-0.621251	29.9327	-18.5957	0.102761	13.4337	32.4536	435.971	-2.24213	0.175567	0.12988	26.0225		2	0	0
ICGV-SM 16501	Spanish	1	4	NaSARRI	2020B	R2	9	10.5	0.58	0.432588	36.335	0.288031	49.7643	2.16719	29.0733	63.0073	-0.0836514	17.2257	30.9599	533.306	-3.20246	0.103482	0.0779331	24.6891		1	0	0
ICGVS-SM 0205	Spanish	1	5	NaSARRI	2020B	R2	2	12.5	0.29	0.450208	27.3978	0.193952	49.768	4.20937	21.5907	90.8831	-0.349199	17.1589	23.6813	406.346	-5.29624	0.0579475	0.0405487	30.025		1	0	0
ICGV 9555	Spanish	1	5	NaSARRI	2020B	R2	18	11.5	0.52	0.452894	40.6461	0.275682	52.2365	-0.50061	29.6734	-14.8548	0.0962732	13.7069	32.6467	447.486	-2.27453	0.182154	0.147817	18.8506		1	0	0
SGV 10005	Spanish	1	5	NaSARRI	2020B	R2	13	13.5	0.52	0.458287	39.9316	0.257274	52.4879	-0.409117	28.3646	-11.6044	0.094655	13.3549	31.5214	420.966	-2.28923	0.165561	0.135166	18.3591		1	0	0
ICGV 01515	Spanish	1	5	NaSARRI	2020B	R2	14	14	0.5	0.431822	42.6189	0.281875	50.2128	-1.45927	29.2667	-42.708	0.155032	11.9051	31.9935	380.885	-2.03423	0.186137	0.147122	20.9603		2	0	0
Serenut 4T	Spanish	1	5	NaSARRI	2020B	R2	15	15.5	0.63	0.401012	52.2821	0.300841	47.9255	-5.78133	30.0026	-173.455	0.368711	5.63284	32.8904	185.267	-1.3279	0.303295	0.257913	14.9629		2	0	0
ICGV 01510	Spanish	1	5	NaSARRI	2020B	R2	14	15.5	0.66	0.436967	45.5776	0.265661	50.8051	-3.05334	28.5725	-87.2415	0.248474	9.33755	31.8592	297.487	-1.70893	0.247061	0.205308	16.9		1	0	0
Serenut 9T	Virginia	1	5	NaSARRI	2020B	R2	6	14.5	0.55	0.451686	34.1797	0.247145	51.1062	2.45638	26.5828	65.2974	-0.115924	16.8164	29.0058	487.774	-3.39836	0.109122	0.0884245	18.9676		1	0	0
ICGV-SM 96714	Valencia	1	5	NaSARRI	2020B	R2	12	14.5	0.67	0.430445	40.5355	0.200628	48.7691	-1.47611	22.5944	-33.3519	0.197532	9.09835	25.6139	233.045	-1.9247	0.222439	0.19378	12.8842		1	0	0
SGV 0065	Virginia	1	5	NaSARRI	2020B	R2	5	10.5	0.63	0.435711	34.3388	0.245606	49.3877	2.27072	25.7184	58.3993	-0.103955	15.9907	27.8894	445.969	-3.32437	0.0977038	0.0809397	17.1581		2	0	0
SGV 0047	Virginia	1	5	NaSARRI	2020B	R2	9	10.5	0.63	0.414088	40.951	0.256014	47.7579	-0.929133	26.1787	-24.3235	0.137267	11.2576	28.5914	321.87	-2.11898	0.173304	0.148158	14.5102		2	0	0
ICGV-SM 03702	Virginia	2	1	NaSARRI	2020B	R2	6	11	0.37	0.405838	37.3381	0.238592	46.3359	0.474717	24.1116	11.4462	0.042642	12.3539	26.1423	322.959	-2.5355	0.143363	0.112207	21.7324		1	0	0
Serenut 4T	Spanish	2	1	NaSARRI	2020B	R2	20	11.5	0.62	0.413206	53.8062	0.261116	48.7615	-6.2758	27.7584	-174.206	0.415353	4.19075	31.2929	131.141	-1.22708	0.312597	0.271355	13.1933		1	0	0
ICGV-SM 99568	Spanish	2	1	NaSARRI	2020B	R2	14	14	0.72	0.443405	45.9935	0.24376	51.2083	-3.38806	27.1603	-92.0207	0.27818	8.33447	30.7541	256.319	-1.62635	0.233766	0.197163	15.6582		2	0	0
ICGV SM 03590	Spanish	2	1	NaSARRI	2020B	R2	7	12	0.55	0.424953	34.3486	0.236023	48.1269	1.91727	24.5007	46.9746	-0.0777894	14.8234	26.5857	394.09	-3.16628	0.11187	0.0880722	21.2724		1	0	0
12CS-015	Spanish	2	1	NaSARRI	2020B	R2	2	12.5	0.3	0.423743	28.095	0.177572	46.8988	2.9942	19.4416	58.2121	-0.228595	14.1072	21.3513	301.207	-4.17974	0.079458	0.0618749	22.1289		2	0	0
ICGV-SM 16502	Spanish	2	1	NaSARRI	2020B	R2	8	14	0.32	0.396016	39.7459	0.252191	45.6208	-0.415209	24.8574	-10.321	0.107733	11.282	26.8256	302.647	-2.24302	0.157807	0.132913	15.7748		1	0	0
SGV 0805	Valencia	2	1	NaSARRI	2020B	R2	16	16.5	0.56	0.403011	54.8537	0.288952	48.1655	-6.78089	29.4541	-199.725	0.417934	4.02918	32.697	131.742	-1.20421	0.300636	0.265646	11.6385		1	0	0
Serenut 9T	Virginia	2	1	NaSARRI	2020B	R2	8	10.5	0.46	0.403936	35.9038	0.24516	46.0898	1.27217	24.3601	30.9901	-0.0225979	13.5967	26.1512	355.569	-2.85867	0.124896	0.0989172	20.8002		1	0	0
ICGV-SM 08556	Spanish	2	1	NaSARRI	2020B	R2	11	11.5	0.62	0.465818	43.7749	0.219218	53.0686	-2.69278	25.9302	-69.8242	0.249319	9.00975	29.8624	269.053	-1.73307	0.205708	0.169648	17.5299		1	0	0
Serenut 11T	Virginia	2	1	NaSARRI	2020B	R2	10	12	0.53	0.435513	44.3024	0.245301	50.2346	-2.61358	26.74	-69.8872	0.238099	9.22859	29.9988	276.846	-1.75595	0.203614	0.170288	16.3673		2	0	0
ICGV 01502	Spanish	2	2	NaSARRI	2020B	R2	9	14	0.51	0.399162	44.2806	0.254966	46.3727	-2.37837	25.6652	-61.0412	0.232641	8.82357	28.104	247.978	-1.77154	0.201863	0.162129	19.684		2	0	0
SGV 990400	Virginia	2	2	NaSARRI	2020B	R2	8	15	0.5	0.405565	45.1189	0.240804	46.9509	-2.86249	25.0083	-71.5861	0.26757	7.92307	27.7498	219.864	-1.66482	0.224656	0.185648	17.3637		2	0	0
SGV 0071	Virginia	2	2	NaSARRI	2020B	R2	9	10.5	0.48	0.415882	36.8839	0.230488	47.2937	0.545602	23.9186	13.0501	0.0372869	12.4732	26.1567	326.258	-2.56274	0.135552	0.110574	18.4275		1	0	0
ICGV 01510	Spanish	2	2	NaSARRI	2020B	R2	16	12.5	0.53	0.410505	50.8657	0.246738	48.0108	-5.08759	26.222	-133.407	0.376828	5.27156	29.5188	155.61	-1.33838	0.275645	0.235261	14.6509		1	0	0
ICGV-SM 95355	Virginia	2	2	NaSARRI	2020B	R2	14	12.5	0.54	0.386133	47.019	0.253308	45.1064	-3.4355	25.1295	-86.3325	0.300051	6.99992	27.5412	192.786	-1.55706	0.232741	0.198341	14.7807		1	0	0
DOK 1R	Spanish	2	2	NaSARRI	2020B	R2	8	13	0.63	0.392174	41.4339	0.25296	45.3436	-1.16917	24.8988	-29.1109	0.160276	10.1797	26.9478	274.32	-2.03328	0.174433	0.130435	25.2235		1	0	0
ICGVS-SM 0205	Spanish	2	2	NaSARRI	2020B	R2	5	12.5	0.5	0.41511	36.2852	0.237116	47.2381	0.97204	24.3189	23.639	0.00229683	13.2581	26.424	350.333	-2.73066	0.123923	0.10148	18.1103		1	0	0
Serenut 8R	Virginia	2	2	NaSARRI	2020B	R2	12	12.5	0.6	0.445749	45.2478	0.208993	50.8691	-3.21949	24.3272	-78.3212	0.295621	7.42439	28.0131	207.98	-1.59516	0.230977	0.20573	10.9306		1	0	0
SGV 10010 ER	Spanish	2	2	NaSARRI	2020B	R2	8	10	0.51	0.389476	40.8246	0.243892	44.8844	-1.00081	24.045	-24.0645	0.153638	10.0478	26.0546	261.791	-2.06402	0.188269	0.158428	15.8503		1	0	0
SGV 0060	Virginia	2	2	NaSARRI	2020B	R2	12	9.5	0.56	0.399301	42.1626	0.248424	46.1309	-1.53351	24.9822	-38.3104	0.18415	9.75929	27.2763	266.197	-1.94608	0.1831	0.155575	15.0328		2	0	0
DOK 1T	Spanish	2	3	NaSARRI	2020B	R2	1	11	0.34	0.386494	30.5345	0.178557	43.1114	1.80874	18.3651	33.2177	-0.0921308	11.5701	19.9117	230.38	-3.26303	0.0905955	0.0650952	28.1475		1	0	0
ICGV-SM 88710	Virginia	2	3	NaSARRI	2020B	R2	14	14	0.66	0.40881	51.9963	0.258801	48.0998	-5.5406	27.188	-150.638	0.387838	4.98798	30.4845	152.056	-1.30102	0.268328	0.224874	16.1947		1	0	0
SGV 0065	Virginia	2	3	NaSARRI	2020B	R2	11	8	0.57	0.395843	42.5284	0.247634	45.771	-1.71502	24.7981	-42.5293	0.197362	9.39345	27.0664	254.247	-1.899	0.195503	0.158706	18.8216		1	0	0
RedBeauty	Valencia	2	3	NaSARRI	2020B	R2	9	16.5	0.52	0.39732	50.0374	0.269832	46.8345	-4.70981	27.2336	-128.265	0.346644	6.09741	30.0451	183.197	-1.40865	0.253646	0.200813	20.8296		1	0	0
ICGV 9555	Spanish	2	3	NaSARRI	2020B	R2	15	15.5	0.68	0.385161	54.8441	0.277101	45.937	-6.4525	27.5343	-177.665	0.426018	3.66271	30.4124	111.392	-1.19191	0.306632	0.249866	18.5127		1	0	0
ICGV-SM 95526	Valencia	2	3	NaSARRI	2020B	R2	12	15.5	0.61	0.382172	52.3819	0.280366	45.4657	-5.53119	27.3881	-151.489	0.385102	4.87676	29.9833	146.222	-1.29699	0.288524	0.235501	18.3773		1	0	0
ICGV 01504	Spanish	2	3	NaSARRI	2020B	R2	12	18	0.69	0.391455	58.1498	0.287453	47.0749	-7.86332	28.9685	-227.789	0.468564	2.24825	32.2048	72.4044	-1.08064	0.323709	0.275566	14.8723		2	1	8.33333
SGV 0080	Virginia	2	3	NaSARRI	2020B	R2	5	7.5	0.4	0.425567	33.4441	0.239514	48.15	2.50516	24.6837	61.8368	-0.129875	15.7778	26.6373	420.278	-3.49214	0.0948778	0.0759223	19.9788		1	0	0
ICGV-SM 01709	Virginia	2	3	NaSARRI	2020B	R2	9	10.5	0.62	0.39346	44.1671	0.257386	45.7627	-2.31663	25.5467	-59.1824	0.229816	8.81303	27.8427	245.379	-1.78014	0.20879	0.172116	17.5648		1	0	0
SGV 0075	Virginia	2	3	NaSARRI	2020B	R2	13	11	0.66	0.396338	54.3863	0.287994	47.3531	-6.49675	28.9525	-188.097	0.411352	4.19878	31.9982	134.353	-1.22214	0.286218	0.243361	14.9736		2	0	0
Serenut 5R	Virginia	2	4	NaSARRI	2020B	R2	13	9	0.46	0.423826	42.9723	0.238219	48.7502	-2.03907	25.4876	-51.9709	0.213069	9.45255	28.4184	268.626	-1.8467	0.20059	0.16533	17.5783		2	0	0
SGV 0084	Virginia	2	4	NaSARRI	2020B	R2	9	11	0.45	0.437191	38.0887	0.230091	49.6908	0	24.9804	0	0.076981	12.3298	27.7419	342.051	-2.38065	0.147625	0.117469	20.427		1	0	0
ICGV-SM 96714	Valencia	2	4	NaSARRI	2020B	R2	15	12.5	0.69	0.42574	46.5948	0.26489	49.6466	-3.47284	28.0316	-97.3491	0.275214	8.41564	31.1884	262.47	-1.62388	0.230938	0.193294	16.3004		1	0	0
ICGV 01515	Spanish	2	4	NaSARRI	2020B	R2	11	16	0.64	0.418596	49.0672	0.262295	49.018	-4.47476	27.6949	-123.928	0.330106	6.77943	30.9415	209.766	-1.45938	0.243806	0.199544	18.1548		1	0	0
Acholi White	Valencia	2	4	NaSARRI	2020B	R2	13	15.5	0.7	0.42102	56.2701	0.275605	50.0786	-7.43396	29.5578	-219.732	0.443989	3.26704	33.4218	109.19	-1.14553	0.316916	0.259803	18.0215		1	0	0
ICGV 01514	Spanish	2	4	NaSARRI	2020B	R2	10	13.5	0.67	0.421249	41.6139	0.261617	48.6781	-1.18298	27.0405	-31.9884	0.149399	11.3088	29.6199	334.965	-2.06765	0.174317	0.127862	26.6498		2	0	0
Serenut 14R	Virginia	2	4	NaSARRI	2020B	R2	14	12	0.69	0.400554	49.9428	0.260567	47.051	-4.69451	26.6892	-125.293	0.351689	5.93712	29.6238	175.88	-1.39998	0.257419	0.213959	16.883		1	0	0
ICGV-SM 95714	Valencia	2	4	NaSARRI	2020B	R2	8	17	0.65	0.40875	43.6276	0.276739	47.6836	-1.9717	27.7438	-54.7023	0.193498	10.3215	30.1504	311.196	-1.89505	0.181261	0.143191	21.0028		2	0	0
ICGV-SM 01731	Virginia	2	4	NaSARRI	2020B	R2	7	14	0.46	0.39509	35.2575	0.253304	45.1531	1.76339	24.4461	43.1079	-0.0644677	14.2488	25.9184	369.306	-3.09143	0.114699	0.0868665	24.2659		1	0	0
B7-30-9-3	Spanish	2	4	NaSARRI	2020B	R2	8	11	0.45	0.411531	40.7624	0.25986	47.5148	-0.799708	26.3202	-21.0485	0.128002	11.4785	28.6334	328.668	-2.15434	0.15586	0.122611	21.3322		2	0	0
JL 24	Spanish	2	5	NaSARRI	2020B	R2	8	12	0.39	0.395872	40.7433	0.279543	46.0403	-0.516659	26.968	-13.9333	0.10649	11.987	28.7773	344.955	-2.23517	0.179057	0.14791	17.3952		1	0	0
SGV 0047	Virginia	2	5	NaSARRI	2020B	R2	10	9.5	0.63	0.443034	39.627	0.253671	50.7659	-0.322783	27.2854	-8.80728	0.0924758	12.885	30.1432	388.394	-2.30188	0.166454	0.13411	19.4312		1	0	0
Serenut 6T	Spanish	2	5	NaSARRI	2020B	R2	17	13.5	0.56	0.447624	48.842	0.264725	52.2433	-4.61298	29.3917	-135.583	0.320699	7.47052	33.2478	248.378	-1.48329	0.269149	0.222338	17.3923		2	0	0
SGV 0023	Virginia	2	5	NaSARRI	2020B	R2	6	14	0.67	0.427492	41.9872	0.260628	49.3766	-1.35156	27.3086	-36.9091	0.158567	11.2316	30.0554	337.569	-2.03225	0.177054	0.154827	12.5536		1	0	0
ICGV-SM 16501	Spanish	2	5	NaSARRI	2020B	R2	11	12.5	0.55	0.478029	46.4103	0.254408	55.1614	-3.70728	29.8017	-110.483	0.272814	9.2094	34.1113	314.145	-1.63388	0.239916	0.198426	17.2935		1	0	0
ICGV-SM 16520	Spanish	2	5	NaSARRI	2020B	R2	12	16	0.65	0.448676	51.0487	0.267721	52.5927	-5.57392	29.9106	-166.719	0.360367	6.27895	33.9875	213.406	-1.36776	0.264755	0.213398	19.3979		2	0	0
SGV 10005	Spanish	2	5	NaSARRI	2020B	R2	10	13	0.47	0.451468	40.1028	0.254995	51.7349	-0.538013	27.862	-14.9901	0.104627	12.8873	30.9251	398.542	-2.24882	0.157668	0.117491	25.4822		2	0	0
Serenut 7T	Virginia	2	5	NaSARRI	2020B	R2	12	12.5	0.73	0.435655	43.6697	0.267341	50.5193	-2.1349	28.4501	-60.7382	0.198506	10.6219	31.495	334.535	-1.87979	0.204131	0.16475	19.2921		1	0	0
ICGV 02501	Spanish	2	5	NaSARRI	2020B	R2	15	11.5	0.76	0.422116	49.7307	0.275916	49.6798	-4.80912	29.0192	-139.557	0.333587	6.83613	32.328	220.998	-1.4406	0.276046	0.230938	16.3409		2	0	0
SGV 07010	Virginia	2	5	NaSARRI	2020B	R2	9	11	0.64	0.432433	42.7732	0.260339	49.9839	-1.7716	27.6256	-48.9415	0.182359	10.7916	30.5646	329.839	-1.94272	0.200152	0.165598	17.2636		1	0	0
Acholi White	Valencia	3	1	NaSARRI	2020B	R2	11	12.5	0.56	0.442085	40.6389	0.247803	50.6696	-0.911357	26.8774	-24.4949	0.132785	11.8362	29.8739	353.592	-2.13839	0.184995	0.148806	19.5621		1	0	0
ICGV-SM 95714	Valencia	3	1	NaSARRI	2020B	R2	15	13.5	0.54	0.425354	47.328	0.263718	49.6429	-3.78291	27.9803	-105.847	0.291968	7.9431	31.205	247.865	-1.57235	0.244541	0.204822	16.2424		1	0	0
Serenut 5R	Virginia	3	1	NaSARRI	2020B	R2	16	12	0.55	0.42906	51.9122	0.244998	50.1113	-5.62216	27.1166	-152.454	0.392555	4.98398	30.9142	154.076	-1.29587	0.295776	0.255128	13.7428		2	0	0
SGV 07010	Virginia	3	1	NaSARRI	2020B	R2	7	11.5	0.52	0.433217	39.9942	0.247169	49.6466	-0.604786	26.3371	-15.9283	0.114866	11.9793	29.0957	348.547	-2.21209	0.173154	0.138339	20.1065		1	1	14.2857
ICGV 01510	Spanish	3	1	NaSARRI	2020B	R2	14	13	0.61	0.434962	46.7333	0.266203	50.6911	-3.56793	28.637	-102.175	0.275135	8.5944	31.9934	274.964	-1.62252	0.231547	0.190826	17.5863		1	0	0
SGV 0047	Virginia	3	1	NaSARRI	2020B	R2	8	10	0.49	0.435896	39.1766	0.24533	49.8413	-0.237013	26.2326	-6.21747	0.0900639	12.5014	28.9691	362.155	-2.31689	0.148787	0.11662	21.6197		1	0	0
RedBeauty	Valencia	3	1	NaSARRI	2020B	R2	11	16.5	0.6	0.426785	59.2031	0.290579	51.2329	-8.82034	31.3769	-276.755	0.476748	1.98856	35.5624	70.718	-1.05719	0.346705	0.290175	16.3051		2	0	0
SGV 0075	Virginia	3	1	NaSARRI	2020B	R2	14	13.5	0.71	0.432025	55.2423	0.26151	50.979	-7.05122	28.9266	-203.968	0.435463	3.65127	33.0206	120.567	-1.1746	0.316847	0.28122	11.2442		1	0	0
ICGV SM 03590	Spanish	3	1	NaSARRI	2020B	R2	10	13	0.47	0.425407	36.8456	0.255517	48.6249	1.12618	26.27	29.5849	-0.00965295	14.4203	28.4528	410.298	-2.78551	0.151305	0.123272	18.528		1	0	0
SGV 0071	Virginia	3	1	NaSARRI	2020B	R2	12	10.5	0.59																	2	0	0
ICGV-SM 08556	Spanish	3	2	NaSARRI	2020B	R2	14	13	0.57	0.424333	41.8797	0.264803	49.0855	-1.28221	27.4701	-35.2224	0.153414	11.3682	30.1151	342.355	-2.05011	0.184887	0.148954	19.4352		2	0	0
ICGV 01514	Spanish	3	2	NaSARRI	2020B	R2	13	12.5	0.62	0.421365	44.2342	0.254486	48.8107	-2.44918	26.7477	-65.51	0.228446	9.3504	29.6478	277.219	-1.78417	0.209117	0.16766	19.8247		1	0	0
SGV 0023	Virginia	3	2	NaSARRI	2020B	R2	10	13	0.52	0.432556	42.6954	0.25581	49.9255	-1.77477	27.2625	-48.3846	0.184755	10.6404	30.2283	321.642	-1.93651	0.192933	0.156949	18.6511		1	0	0
ICGV-SM 96714	Valencia	3	2	NaSARRI	2020B	R2	16	13	0.59	0.455802	52.4458	0.25773	53.314	-6.16642	29.5772	-182.385	0.390077	5.33856	33.9842	181.427	-1.29269	0.286956	0.243149	15.2662		1	0	0
ICGV 9555	Spanish	3	2	NaSARRI	2020B	R2	13	15	0.68	0.457285	47.6994	0.254516	53.032	-4.16557	28.9201	-120.469	0.303093	8.0145	32.9201	263.838	-1.54154	0.238771	0.204496	14.3547		1	0	0
ICGV-SM 99568	Spanish	3	2	NaSARRI	2020B	R2	10	14	0.64	0.434747	47.5149	0.286053	51.0497	-3.87282	30.2938	-117.323	0.277128	8.79376	33.5872	295.358	-1.60432	0.228603	0.186911	18.2378		2	0	0
ICGV-SM 16502	Spanish	3	2	NaSARRI	2020B	R2	12	14	0.76	0.417017	55.27	0.305921	50.0822	-7.28447	31.6382	-230.468	0.415026	4.20657	35.1549	147.881	-1.20073	0.31195	0.266511	14.5661		1	0	0
DOK 1T	Spanish	3	2	NaSARRI	2020B	R2	8	11.5	0.51	0.424787	39.4189	0.264678	48.9126	-0.0487364	27.2173	-1.32648	0.0742046	13.0785	29.5995	387.119	-2.37875	0.167688	0.132706	20.8613		1	0	0
ICGV-SM 16501	Spanish	3	2	NaSARRI	2020B	R2	11	13	0.49	0.439464	38.3449	0.258448	50.3213	0.435017	27.3495	11.8975	0.0404795	13.9989	29.9438	419.181	-2.53425	0.143363	0.110005	23.2681		1	0	0
ICGV-SM 16520	Spanish	3	2	NaSARRI	2020B	R2	14	13	0.59	0.416442	41.7526	0.275818	48.3539	-1.06172	27.8846	-29.6056	0.137694	11.7787	30.2541	356.352	-2.1069	0.17423	0.13855	20.4787		2	0	0
B7-30-9-3	Spanish	3	3	NaSARRI	2020B	R2	15	12.5	0.51	0.434972	46.6915	0.271769	50.7766	-3.52715	29.0803	-102.571	0.269414	8.82857	32.3953	286.004	-1.63733	0.228815	0.186643	18.4304		1	0	0
SGV 0060	Virginia	3	3	NaSARRI	2020B	R2	13	10	0.49	0.435397	39.2397	0.249253	49.845	-0.205365	26.5283	-5.44799	0.0869243	12.6674	29.2308	370.278	-2.3286	0.15994	0.125273	21.6747		1	0	0
JL 24	Spanish	3	3	NaSARRI	2020B	R2	17	11	0.59	0.45306	52.2996	0.26482	53.1318	-6.14029	30.0343	-184.419	0.384149	5.53416	34.3434	190.062	-1.30421	0.28824	0.243054	15.6764		1	0	0
Serenut 9T	Virginia	3	3	NaSARRI	2020B	R2	2	9	0.3	0.455692	32.1887	0.230758	51.152	3.09337	25.2299	78.0453	-0.180958	17.2168	27.635	475.785	-3.84052	0.0751834	0.0525053	30.1638		1	0	0
12CS-015	Spanish	3	3	NaSARRI	2020B	R2	4	11.5	0.38	0.448873	34.996	0.247941	50.8904	2.02022	26.5916	53.7209	-0.0797943	16.1364	29.0582	468.894	-3.1745	0.114435	0.0884627	22.6961		2	0	0
ICGV-SM 88710	Virginia	3	3	NaSARRI	2020B	R2	7	11.5	0.47	0.424991	35.916	0.265019	48.6097	1.84048	26.8656	49.4456	-0.0645896	15.7242	28.83	453.328	-3.08767	0.119716	0.0894432	25.2868		1	0	0
Serenut 14R	Virginia	3	3	NaSARRI	2020B	R2	3	10.5	0.48	0.426416	32.5995	0.256885	48.3539	3.50851	25.9376	91.0021	-0.214136	17.8252	27.604	492.046	-4.12191	0.0790625	0.0594571	24.7973		1	0	0
Serenut 4T	Spanish	3	3	NaSARRI	2020B	R2	19	13.5	0.78	0.467257	52.4933	0.281381	55.0042	-6.44733	32.2205	-207.736	0.375485	6.02768	36.7973	221.802	-1.31651	0.312863	0.267399	14.5317		2	0	0
SGV 990400	Virginia	3	3	NaSARRI	2020B	R2	13	14	0.65	0.420816	41.1427	0.276359	48.788	-0.752062	28.0941	-21.1285	0.117406	12.3614	30.4794	376.767	-2.18855	0.192128	0.158706	17.3954		2	0	0
SGV 0080	Virginia	3	3	NaSARRI	2020B	R2	15	12.5	0.65	0.425957	42.8403	0.266881	49.3728	-1.70789	27.8071	-47.4917	0.177479	10.8976	30.5669	333.106	-1.95771	0.204141	0.171565	15.958		2	0	0
SGV 0084	Virginia	3	4	NaSARRI	2020B	R2	14	11.5	0.54	0.409793	43.3848	0.271648	47.7071	-1.90181	27.3873	-52.0856	0.191608	10.2921	29.8344	307.057	-1.90467	0.198325	0.161654	18.4903			0	0
SGV 10005	Spanish	3	4	NaSARRI	2020B	R2	13	12.5	0.39	0.421132	39.9531	0.262466	48.5298	-0.362062	26.9218	-9.74736	0.0963137	12.4592	29.3131	365.219	-2.28367	0.166893	0.130616	21.7364		2	0	0
ICGV 02501	Spanish	3	4	NaSARRI	2020B	R2	14	14	0.62	0.437179	45.1345	0.271085	50.8726	-2.81277	28.9828	-81.5221	0.232517	9.85455	32.1876	317.194	-1.75897	0.228932	0.185916	18.7899		2	0	0
SGV 0065	Virginia	3	4	NaSARRI	2020B	R2	14	11	0.51	0.451846	43.6064	0.251163	52.0347	-2.29497	27.9385	-64.1181	0.21099	10.3231	31.4231	324.384	-1.84372	0.218645	0.173144	20.8105		1	0	0
Serenut 6T	Spanish	3	4	NaSARRI	2020B	R2	13	13	0.66	0.445309	43.4651	0.270534	51.5997	-2.0209	29.1683	-58.9463	0.187697	11.1688	32.3641	361.469	-1.9163	0.216165	0.175342	18.8853		2	0	0
SGV 10010 ER	Spanish	3	4	NaSARRI	2020B	R2	14	11.5	0.51	0.436315	39.5608	0.259676	50.1113	-0.188032	27.4305	-5.15781	0.0830254	13.0784	30.0963	393.611	-2.3407	0.165133	0.127967	22.5065		2	0	0
ICGV 01515	Spanish	3	4	NaSARRI	2020B	R2	13	15	0.5	0.443686	45.8942	0.281864	51.8213	-3.14345	30.2704	-95.1535	0.240801	9.93655	33.6138	334.006	-1.72427	0.22741	0.183875	19.1439		2	0	0
DOK 1R	Spanish	3	4	NaSARRI	2020B	R2	11	16	0.63	0.448448	40.5026	0.279261	51.7868	-0.357905	29.7045	-10.6314	0.0874306	13.8867	32.535	451.804	-2.31174	0.173795	0.133548	23.1579		2	0	0
ICGV-SM 03702	Virginia	3	4	NaSARRI	2020B	R2	10	13	0.31	0.450405	36.3208	0.271401	51.4778	1.88172	28.6926	53.9915	-0.0634087	16.8458	31.103	523.955	-3.07716	0.117441	0.0875596	25.444		1	0	0
SGV 0805	Valencia	3	4	NaSARRI	2020B	R2	16	13.5	0.52	0.437333	45.7298	0.304706	51.4604	-2.90129	31.7237	-92.0395	0.21902	10.7959	34.7105	374.73	-1.78636	0.224233	0.179796	19.8172		1	0	0
Serenut 8R	Virginia	3	5	NaSARRI	2020B	R2	14	11.5	0.58	0.3958	41.4141	0.271439	45.9866	-0.947405	26.4328	-25.0426	0.137237	11.151	28.3925	316.606	-2.11296	0.20189	0.163455	19.0375		2	0	0
ICGV 01502	Spanish	3	5	NaSARRI	2020B	R2	9	13	0.64	0.418239	40.0094	0.284137	48.5031	-0.0493574	28.4258	-1.40303	0.0712028	13.4997	30.5495	412.408	-2.38501	0.169572	0.127404	24.8672		2	0	0
Serenut 7T	Virginia	3	5	NaSARRI	2020B	R2	13	10.5	0.47	0.447172	41.363	0.261796	51.4813	-1.0559	28.3294	-29.913	0.135322	12.2723	31.3932	385.267	-2.12045	0.18647	0.142626	23.5126		2	0	0
Serenut 11T	Virginia	3	5	NaSARRI	2020B	R2	11	11	0.57	0.450467	38.0087	0.260806	51.5092	0.689157	28.0426	19.3257	0.0219263	14.7822	30.7817	455.021	-2.62148	0.153908	0.11748	23.6687		1	0	0
ICGV-SM 01709	Virginia	3	5	NaSARRI	2020B	R2	12	11	0.5	0.46216	40.6788	0.256215	52.9586	-0.808179	28.5437	-23.0684	0.119148	12.8711	31.8721	410.228	-2.18705	0.183559	0.142236	22.5122		1	0	0
ICGVS-SM 0205	Spanish	3	5	NaSARRI	2020B	R2	3	12	0.38	0.444604	28.4757	0.205538	49.3803	4.08731	22.3742	91.4501	-0.320146	17.2871	24.3955	421.727	-5.01737	0.069057	0.0475298	31.173		1	0	0
ICGV-SM 95526	Valencia	3	5	NaSARRI	2020B	R2	11	15.5	0.44	0.459416	40.1549	0.269194	52.7979	-0.33295	29.428	-9.79806	0.0866651	13.9224	32.5287	452.876	-2.31818	0.17515	0.136464	22.0871		1	0	0
ICGV-SM 01731	Virginia	3	5	NaSARRI	2020B	R2	5	9	0.32	0.435304	34.2774	0.267287	49.595	2.897	27.3629	79.2704	-0.148984	17.6315	29.2775	516.205	-3.63032	0.0883965	0.0596606	32.5079		1	0	0
ICGV-SM 95355	Virginia	3	5	NaSARRI	2020B	R2	7	8.5	0.48	0.439285	37.3877	0.275501	50.4366	1.29662	28.5711	37.0459	-0.0209818	15.7916	30.8718	487.514	-2.83972	0.124294	0.0972142	21.787		1	0	0
ICGV 01504	Spanish	3	5	NaSARRI	2020B	R2	10	15	0.68	0.429476	45.6393	0.298766	50.487	-2.84599	30.7912	-87.6313	0.222073	10.4395	33.6522	351.313	-1.77972	0.231866	0.185215	20.1198		2	0	0
SGV 10010 ER	Spanish	1	1	Nakabango	2020B	R2	9	5.85	0.43	0.359503	22.1322	0.251178	40.0823	8.61128	21.2049	182.602	-1.11983	22.3016	20.5723	458.796	57.42	0.116953	0.0797048	31.8489			1	11.1111
Serenut 14R	Virginia	1	1	Nakabango	2020B	R2	7	8.05	0.51	0.361897	28.9564	0.253517	40.9718	4.75704	22.2138	105.672	-0.407119	17.1977	22.4183	385.543	-6.20773	0.18249	0.126549	30.6541		1	0	0
DOK 1T	Spanish	1	1	Nakabango	2020B	R2	3	5.75	0.47	0.356471	16.8067	0.201774	39.0067	8.9542	17.4562	156.306	-1.67422	20.9795	16.9548	355.704	12.211	0.0671149	0.033443	50.1706		1	0	0
ICGV SM 03590	Spanish	1	1	Nakabango	2020B	R2	11	6.6	0.53	0.354352	23.7416	0.26784	39.7931	8.24483	22.2068	183.091	-0.968433	22.1316	21.4379	474.455	-138.982	0.122727	0.0876347	28.5939		1	0	0
ICGV 02501	Spanish	1	1	Nakabango	2020B	R2	15	8.1	0.58	0.33543	42.6931	0.295899	39.5626	-1.20317	24.8461	-29.8941	0.162901	9.5114	25.4354	241.926	-2.00584	0.282011	0.214392	23.9773		2	0	0
SGV 0080	Virginia	1	1	Nakabango	2020B	R2	6	6.15	0.54	0.352885	23.4672	0.263728	39.578	8.20206	21.8509	179.222	-0.983297	21.8834	21.0958	461.647	-197.672	0.128873	0.0826415	35.8736		2	0	0
JL 24	Spanish	1	1	Nakabango	2020B	R2	7	10.25	0.51	0.341896	24.4182	0.273823	38.525	7.83902	22.0215	172.627	-0.90091	21.2368	21.0651	447.355	-49.8682	0.142106	0.0893924	37.0947		2	0	0
Acholi White	Valencia	1	1	Nakabango	2020B	R2	9	13.25	0.58	0.360831	35.5207	0.282225	41.6963	2.07966	24.6941	51.3552	-0.0914406	14.3854	25.2333	362.992	-3.25953	0.249397	0.173219	30.5448		2	0	0
ICGV-SM 16502	Spanish	1	1	Nakabango	2020B	R2	9	10.55	0.55	0.353998	24.9124	0.27437	39.9101	7.80185	22.7222	177.275	-0.854487	21.7086	21.989	477.352	-33.3477	0.150283	0.10508	30.0782		2	0	0
SGV 0060	Virginia	1	1	Nakabango	2020B	R2	12	7.1	0.63	0.35853	23.2154	0.258467	40.1277	8.25318	21.743	179.449	-1.00114	22.0069	21.1183	464.747	-378.259	0.144102	0.10367	28.0578		2	0	0
SGV 0075	Virginia	1	2	Nakabango	2020B	R2	12	16.25	0.71	0.36175	36.6843	0.264682	41.7106	1.14549	23.7137	27.1639	-0.0123466	12.6678	24.5965	311.583	-2.80495	0.241364	0.166484	31.0239		1	0	0
ICGV 01502	Spanish	1	2	Nakabango	2020B	R2	9	9.55	0.54	0.368447	26.5089	0.246008	41.4087	5.92096	21.761	128.846	-0.584436	18.7746	21.8882	410.942	-9.64183	0.170756	0.102616	39.905		1	0	0
SGV 07010	Virginia	1	2	Nakabango	2020B	R2	11	6.75	0.5	0.351858	25.3103	0.264722	39.6345	7.12723	22.0525	157.173	-0.769498	20.3938	21.4971	438.408	-19.4422	0.132403	0.0839947	36.5615		1	0	0
Serenut 5R	Virginia	1	2	Nakabango	2020B	R2	17	6.85	0.6	0.35689	33.0556	0.277974	40.9962	3.24359	23.9556	77.7021	-0.206668	15.6935	24.207	379.892	-4.08897	0.223417	0.174075	22.0852		1	0	0
12CS-015	Spanish	1	2	Nakabango	2020B	R2	7	9.35	0.57	0.359209	24.2627	0.289267	40.543	8.99726	23.8883	214.929	-1.00651	24.0784	22.8664	550.585	216.724	0.131592	0.0849893	35.4145		1	1	14.2857
DOK 1R	Spanish	1	2	Nakabango	2020B	R2	13	11.35	0.56	0.356172	30.4777	0.269039	40.6025	4.38538	23.071	101.175	-0.343944	16.9489	23.1385	392.172	-5.43661	0.195034	0.130641	33.0164		1	0	0
B7-30-9-3	Spanish	1	2	Nakabango	2020B	R2	13	8.25	0.55	0.357309	31.3936	0.29411	41.05	4.62289	24.8677	114.961	-0.341061	18.0635	24.6974	446.121	-5.47042	0.205535	0.130882	36.3213		2	1	7.69231
ICGV-SM 08556	Spanish	1	2	Nakabango	2020B	R2	16	11.8	0.58	0.358337	37.1681	0.279882	41.5289	1.19366	24.5658	29.3233	-0.0158922	13.0389	25.26	329.362	-2.82115	0.2588	0.177615	31.3699		2	0	0
Serenut 7T	Virginia	1	2	Nakabango	2020B	R2	10	8.8	0.56	0.358448	24.7778	0.260261	40.2735	7.38077	22.0233	162.549	-0.815824	20.8588	21.568	449.884	-24.2374	0.147933	0.102079	30.9963		1	0	0
ICGV-SM 01709	Virginia	1	2	Nakabango	2020B	R2	9	6.75	0.49	0.368208	23.2056	0.250314	41.123	8.06015	21.6939	174.856	-0.964916	21.8628	21.3346	466.434	-89.4219	0.143346	0.0900423	37.1855		1	0	0
ICGV-SM 95526	Valencia	1	3	Nakabango	2020B	R2	14	10.1	0.57	0.343312	34.5151	0.292413	39.742	2.70084	24.293	65.6115	-0.150569	14.8638	24.2698	360.742	-3.66457	0.21787	0.141096	35.2381		2	3	21.4286
ICGV-SM 95355	Virginia	1	3	Nakabango	2020B	R2	9	9.05	0.41	0.344959	24.6751	0.259765	38.7801	7.14809	21.3328	152.489	-0.809774	19.9881	20.6859	413.47	-23.3676	0.138064	0.0754238	45.3705		1	3	33.3333
Serenut 6T	Spanish	1	3	Nakabango	2020B	R2	13	10.4	0.59	0.358103	29.237	0.277031	40.7804	5.35875	23.5687	126.299	-0.453802	18.5932	23.4045	435.164	-7.05489	0.184021	0.112902	38.647		2	2	15.3846
ICGV-SM 16520	Spanish	1	3	Nakabango	2020B	R2	18	9.65	0.56	0.343679	37.276	0.307223	40.1781	1.55144	25.5214	39.5948	-0.044168	13.7286	25.608	351.562	-2.97659	0.243025	0.182664	24.8375		2	2	11.1111
ICGV 01504	Spanish	1	3	Nakabango	2020B	R2	12	12.5	0.61	0.343013	34.6705	0.294462	39.742	2.65775	24.4353	64.943	-0.14556	14.8551	24.394	362.375	-3.62932	0.227808	0.165794	27.2219		2	0	0
SGV 0805	Valencia	1	3	Nakabango	2020B	R2	14	7.35	0.55	0.348302	25.2192	0.287212	39.413	8.04012	23.2866	187.228	-0.866663	22.2034	22.2866	494.839	-40.1466	0.145563	0.108387	25.5393		1	2	14.2857
ICGV-SM 01731	Virginia	1	3	Nakabango	2020B	R2	11	5.25	0.48	0.346208	22.0825	0.264139	38.7166	8.9806	21.3911	192.104	-1.19021	22.6893	20.3515	461.763	31.4246	0.122033	0.0811712	33.4841		1	0	0
ICGV-SM 95714	Valencia	1	3	Nakabango	2020B	R2	13	8.6	0.57	0.354007	32.9475	0.287488	40.7557	3.51863	24.4056	85.8744	-0.230148	16.2315	24.4643	397.091	-4.29942	0.221031	0.143283	35.1754		2	1	7.69231
Serenut 11T	Virginia	1	3	Nakabango	2020B	R2	8	7.3	0.46	0.351913	25.6864	0.256533	39.6088	6.56871	21.5635	141.644	-0.696314	19.371	21.1875	410.421	-14.0452	0.16105	0.110903	31.1377		1	0	0
Serenut 8R	Virginia	1	3	Nakabango	2020B	R2	10	10.1	0.63	0.346412	25.0014	0.246937	38.8699	6.45983	20.63	133.266	-0.719809	18.7113	20.2425	378.764	-14.9941	0.169373	0.111666	34.071			3	30
ICGV-SM 99568	Spanish	1	4	Nakabango	2020B	R2	11	14.7	0.64	0.350724	33.5575	0.262671	40.1982	2.55182	22.683	57.8828	-0.146875	14.0975	23.0767	325.324	-3.62498	0.229602	0.167275	27.1459		1	1	9.09091
ICGV-SM 88710	Virginia	1	4	Nakabango	2020B	R2	11	8.5	0.5	0.352288	23.5547	0.241638	39.3561	7.15389	20.4271	146.133	-0.862301	19.7108	20.034	394.886	-29.2817	0.140352	0.104263	25.7136		1	0	0
SGV 0071	Virginia	1	4	Nakabango	2020B	R2	12	6.8	0.44	0.341272	26.815	0.2482	38.4661	5.45537	20.6547	112.679	-0.550068	17.2113	20.3725	350.637	-8.79154	0.16492	0.113462	31.202		1	0	0
SGV 0084	Virginia	1	4	Nakabango	2020B	R2	12	6.1	0.43	0.348315	19.6283	0.252628	38.6528	9.99548	20.5244	205.151	-1.5605	23.8098	19.3952	461.795	12.3601	0.105128	0.0735644	30.0237		1	0	0
ICGV 01514	Spanish	1	4	Nakabango	2020B	R2	13	9.3	0.6	0.345583	34.3249	0.266384	39.7267	2.20561	22.7523	50.1826	-0.111906	13.5696	23.0887	313.304	-3.38986	0.228638	0.168184	26.441		1	0	0
RedBeauty	Valencia	1	4	Nakabango	2020B	R2	14	16.1	0.6	0.343813	28.8934	0.279304	39.1793	5.42733	22.9305	124.452	-0.478547	18.1922	22.4635	408.661	-7.52301	0.183348	0.130099	29.0427		2	4	28.5714
ICGV-SM 03702	Virginia	1	4	Nakabango	2020B	R2	11	6.05	0.5	0.345265	21.0046	0.243966	38.3857	8.58991	19.9891	171.704	-1.22426	21.4636	19.1603	411.248	30.4035	0.129697	0.0962832	25.7629		1	0	0
SGV 0023	Virginia	1	4	Nakabango	2020B	R2	11	7.1	0.61	0.353542	23.7825	0.248412	39.5626	7.33289	20.9425	153.569	-0.866948	20.2224	20.49	414.358	-31.3275	0.151232	0.11602	23.2835		1	0	0
SGV 990400	Virginia	1	4	Nakabango	2020B	R2	11	11.25	0.58	0.3567	26.7208	0.240847	40.0975	5.46491	20.904	114.238	-0.543207	17.5648	20.9453	367.899	-8.56285	0.182188	0.133917	26.4953		1	1	9.09091
ICGV-SM 16501	Spanish	1	4	Nakabango	2020B	R2	10	9	0.5	0.347618	24.9189	0.247941	39.0015	6.5802	20.738	136.46	-0.736279	18.9511	20.3407	385.479	-16.0248	0.154564	0.107569	30.4045		2	1	10
ICGVS-SM 0205	Spanish	1	5	Nakabango	2020B	R2	7	6.75	0.42	0.357641	21.461	0.260191	39.8898	9.42072	21.6376	203.842	-1.27423	23.6556	20.7369	490.544	22.6154	0.102738	0.0617248	39.92		1	1	14.2857
ICGV 9555	Spanish	1	5	Nakabango	2020B	R2	15	11.6	0.62	0.346231	41.0809	0.274217	40.4185	-0.733264	23.9149	-17.5359	0.135157	9.92969	24.8102	246.358	-2.12461	0.289768	0.215334	25.6876		1	5	33.3333
SGV 10005	Spanish	1	5	Nakabango	2020B	R2	13	10.85	0.46	0.348862	28.7413	0.25866	39.5523	4.8894	21.8661	106.912	-0.432716	17.0466	21.7675	371.062	-6.60991	0.172124	0.122346	28.9201		2	2	15.3846
ICGV 01515	Spanish	1	5	Nakabango	2020B	R2	12	11	0.54	0.357831	30.4362	0.267361	40.7705	4.36014	23.0397	100.456	-0.341485	16.9237	23.1574	391.91	-5.40268	0.188717	0.131139	30.51		2	3	25
Serenut 4T	Spanish	1	5	Nakabango	2020B	R2	20	14.75	0.76	0.34993	52.8411	0.243224	41.259	-5.13707	23.02	-118.256	0.420966	3.56922	25.1026	89.5966	-1.22804	0.387258	0.30702	20.7194		2	0	0
ICGV 01510	Spanish	1	5	Nakabango	2020B	R2	15	12.8	0.57	0.343464	35.2621	0.278916	39.6857	2.01361	23.5238	47.3678	-0.0900584	13.5845	23.7599	322.765	-3.25218	0.239821	0.175299	26.9045		2	1	6.66667
Serenut 9T	Virginia	1	5	Nakabango	2020B	R2	6	5.3	0.36	0.362227	18.8877	0.257893	40.1277	11.145	21.4263	238.797	-1.79856	26.1918	20.2541	530.492	9.20398	0.0980752	0.0610075	37.7952		2	0	0
ICGV-SM 96714	Valencia	1	5	Nakabango	2020B	R2	14	9.6	0.44	0.354944	23.863	0.259256	39.8033	7.78913	21.7077	169.084	-0.910158	21.2524	21.109	448.617	-48.2865	0.151018	0.0987671	34.5991		2	5	35.7143
SGV 0065	Virginia	1	5	Nakabango	2020B	R2	2	6.3	0.53	0.364194	23.342	0.25373	40.7261	8.06831	21.7339	175.356	-0.963928	21.8278	21.281	464.519	-92.9157	0.146257	0.0920887	37.0366		0	10	500
SGV 0047	Virginia	1	5	Nakabango	2020B	R2	7	8	0.45	0.327105	23.9931	0.256643	36.7251	7.06546	20.1971	142.702	-0.85842	19.0585	19.2726	367.305	-30.748	0.159128	0.103783	34.7802		2	0	0
ICGV-SM 03702	Virginia	2	1	Nakabango	2020B	R2	12	4.85	0.5	0.352264	22.3394	0.250922	39.3146	8.29737	20.8945	173.369	-1.07337	21.5772	20.2005	435.871	108.232	0.124963	0.0860144	31.1682		1	0	0
Serenut 4T	Spanish	2	1	Nakabango	2020B	R2	21	14.25	0.6	0.351598	41.1353	0.21923	40.3986	-1.36319	20.5554	-28.0209	0.206225	7.77588	22.0258	171.27	-1.88865	0.286782	0.226864	20.8931		2	0	0
ICGV-SM 99568	Spanish	2	1	Nakabango	2020B	R2	15	15.3	0.61	0.351493	32.2909	0.26135	40.163	3.16959	22.5189	71.3757	-0.213234	14.9142	22.8071	340.15	-4.12928	0.218186	0.16103	26.1961		2	5	33.3333
ICGV SM 03590	Spanish	2	1	Nakabango	2020B	R2	6	5.5	0.33	0.362892	14.1184	0.204317	39.4802	10.8614	17.5855	191.002	-2.55339	23.9205	16.7766	401.306	6.46126	0.0480933	0.0299518	37.7215		2	0	0
12CS-015	Spanish	2	1	Nakabango	2020B	R2	10	7.95	0.57	0.358774	21.399	0.265483	40.0419	9.77572	22.0166	215.229	-1.32555	24.3741	21.0211	512.369	18.8679	0.108756	0.0651817	40.0662		2	3	30
ICGV-SM 16502	Spanish	2	1	Nakabango	2020B	R2	13	11.6	0.56	0.358736	28.7773	0.27036	40.7508	5.40485	23.1075	124.893	-0.47104	18.4723	23.0002	424.866	-7.32152	0.189101	0.139228	26.3736		2	0	0
SGV 0805	Valencia	2	1	Nakabango	2020B	R2	14	9.65	0.53	0.358862	24.1482	0.264238	40.2936	7.94402	22.2319	176.61	-0.908437	21.7814	21.6361	471.266	-49.6299	0.144642	0.10828	25.1391		2	2	14.2857
Serenut 9T	Virginia	2	1	Nakabango	2020B	R2	10	9	0.51	0.357376	27.9621	0.252276	40.3736	5.20699	21.7929	113.476	-0.478449	17.596	21.8298	384.117	-7.34193	0.191227	0.136572	28.581		2	1	10
ICGV-SM 08556	Spanish	2	1	Nakabango	2020B	R2	9	12.75	0.56	0.365233	22.3834	0.206216	40.4235	6.34677	18.6157	118.15	-0.805909	17.9099	18.7867	336.468	-19.0197	0.148325	0.107676	27.4054		2	2	22.2222
Serenut 11T	Virginia	2	1	Nakabango	2020B	R2	10	10.6	0.59	0.358705	25.1097	0.260172	40.3336	7.1624	22.0691	158.067	-0.774819	20.5656	21.6651	445.555	-19.6386	0.158629	0.112694	28.9575		2	0	0
ICGV 01502	Spanish	2	2	Nakabango	2020B	R2	19	15.35	0.54	0.355561	35.8064	0.262885	40.9277	1.51122	23.1657	35.0085	-0.0451319	12.8874	23.8677	307.594	-2.9845	0.24607	0.168395	31.5662		2	4	21.0526
SGV 990400	Virginia	2	2	Nakabango	2020B	R2	13	9.3	0.49	0.361806	24.824	0.251018	40.5777	7.00234	21.6189	151.383	-0.768714	20.1807	21.3647	431.155	-18.5647	0.152866	0.11505	24.7377		2	0	0
SGV 0071	Virginia	2	2	Nakabango	2020B	R2	12	6	0.36	0.363185	20.0396	0.2577	40.3386	10.3749	21.5897	223.991	-1.535	25.1428	20.5995	517.929	12.6272	0.0958571	0.0641553	33.072		2	0	0
ICGV 01510	Spanish	2	2	Nakabango	2020B	R2	14	12.6	0.5	0.354523	27.6423	0.258347	40.0823	5.55097	22.0133	122.195	-0.521233	18.1437	21.8839	397.055	-8.23325	0.178857	0.12749	28.7195		2	1	7.14286
ICGV-SM 95355	Virginia	2	2	Nakabango	2020B	R2	4	7.15	0.48	0.351863	14.8463	0.201769	38.3535	9.95001	17.0848	169.994	-2.20044	22.1593	16.3041	361.287	7.71615	0.056158	0.0327676	41.651		2	0	0
DOK 1R	Spanish	2	2	Nakabango	2020B	R2	11	7.65	0.52	0.355234	24.1895	0.263865	39.9	7.80455	22.036	171.982	-0.893484	21.428	21.4075	458.72	-42.709	0.13394	0.0902267	32.6364		2	0	0
ICGVS-SM 0205	Spanish	2	2	Nakabango	2020B	R2	5	8.5	0.6	0.34572	19.5772	0.271834	38.4929	11.0008	21.5913	237.521	-1.72569	25.7318	20.0556	516.067	9.57786	0.0940142	0.0652096	30.6385		2	0	0
Serenut 8R	Virginia	2	2	Nakabango	2020B	R2	6	10.55	0.52	0.361379	20.2832	0.250528	40.1176	9.79103	21.0806	206.401	-1.43064	24.0086	20.2321	485.746	15.574	0.119188	0.08554	28.2309		2	0	0
SGV 10010 ER	Spanish	2	2	Nakabango	2020B	R2	10	7.25	0.59	0.363046	23.3367	0.249671	40.5678	7.85068	21.4188	168.152	-0.940505	21.3463	21.0174	448.644	-61.6325	0.146385	0.108764	25.7001		2	0	0
SGV 0060	Virginia	2	2	Nakabango	2020B	R2	2	5.85	0.49	0.375351	22.8421	0.252621	41.8818	8.53004	22.1288	188.76	-1.0316	22.8717	21.7821	498.194	487.159	0.140504	0.0916613	34.7623		1	0	0
DOK 1T	Spanish	2	3	Nakabango	2020B	R2	1	3		0.38963	15.2154	0.217657	42.4775	11.7888	19.5979	231.036	-2.44944	26.7539	18.9646	507.377	6.58656	0.0219748	0.00675091	69.2789			0	0
ICGV-SM 88710	Virginia	2	3	Nakabango	2020B	R2	11	5.85	0.53	0.353754	22.3524	0.280201	39.6909	9.72918	22.8118	221.941	-1.23971	24.5741	21.6162	531.198	23.0816	0.108996	0.0728127	33.1972		2	0	0
SGV 0065	Virginia	2	3	Nakabango	2020B	R2	12	4.35	0.54	0.34582	24.6144	0.263728	38.8963	7.37576	21.6093	159.385	-0.837069	20.4536	20.9008	427.497	-27.8832	0.148075	0.0930209	37.1798		2	0	0
RedBeauty	Valencia	2	3	Nakabango	2020B	R2
ICGV 9555	Spanish	2	3	Nakabango	2020B	R2	18	11.7	0.52	0.355185	25.5985	0.219026	39.6806	5.12177	19.3452	99.0816	-0.541503	16.3574	19.5461	319.723	-8.33276	0.174623	0.11956	31.5324		2	4	22.2222
ICGV-SM 95526	Valencia	2	3	Nakabango	2020B	R2	16	9.85	0.49	0.343854	28.5853	0.294314	39.2886	6.111	23.8442	145.712	-0.545661	19.5637	23.1021	451.962	-9.18061	0.171547	0.109669	36.0703		2	4	25
ICGV 01504	Spanish	2	3	Nakabango	2020B	R2	18	13.25	0.5	0.351819	31.052	0.277308	40.2434	4.29392	23.4319	100.615	-0.327134	16.9059	23.3717	395.121	-5.26099	0.217516	0.153419	29.4676		2	5	27.7778
SGV 0080	Virginia	2	3	Nakabango	2020B	R2	6	5.05	0.46	0.371266	22.3528	0.275608	41.5673	9.92385	23.4098	232.316	-1.23207	25.4621	22.5221	573.461	24.2188	0.113929	0.0703911	38.2147		2	0	0
ICGV-SM 01709	Virginia	2	3	Nakabango	2020B	R2	14	7.85	0.54	0.377094	29.7238	0.279647	42.9473	5.41832	24.7841	134.288	-0.433897	19.4924	24.9452	486.243	-6.73155	0.195054	0.135867	30.3441		2	0	0
SGV 0075	Virginia	2	3	Nakabango	2020B	R2	10	10	0.5	0.358179	20.1776	0.274614	39.9305	11.0787	22.4585	248.811	-1.62825	26.4996	21.0989	559.112	10.589	0.102308	0.0723408	29.291		2	0	0
Serenut 5R	Virginia	2	4	Nakabango	2020B	R2	17	8.85	0.53	0.366727	36.7258	0.263878	42.2631	1.12402	23.9087	26.8738	-0.0104283	12.7766	24.9014	318.155	-2.79456	0.252893	0.186268	26.3452		2	0	0
SGV 0084	Virginia	2	4	Nakabango	2020B	R2	12	4.55	0.51	0.348876	21.3223	0.264817	38.9437	9.56154	21.478	205.363	-1.32568	23.6268	20.3588	481.013	18.9534	0.101616	0.0588225	42.113		2		0
ICGV-SM 96714	Valencia	2	4	Nakabango	2020B	R2	18	7.6	0.52	0.359426	30.6681	0.290764	41.1911	4.98327	24.6916	123.045	-0.384703	18.5462	24.5161	454.681	-6.0348	0.188229	0.110636	41.2229		2	4	22.2222
ICGV 01515	Spanish	2	4	Nakabango	2020B	R2	15	12.15	0.51	0.366113	32.6306	0.296832	42.1741	4.09867	25.649	105.127	-0.274822	17.7629	25.7392	457.202	-4.73491	0.205436	0.146996	28.4466		2	2	13.3333
Acholi White	Valencia	2	4	Nakabango	2020B	R2	9	8.25	0.43	0.393185	22.2533	0.289499	44.0419	11.2725	25.4371	286.739	-1.35479	28.8376	24.5329	707.47	15.8476	0.0953853	0.0510617	46.4679		2	7	77.7778
ICGV 01514	Spanish	2	4	Nakabango	2020B	R2	14	12.2	0.53	0.366995	37.3462	0.316867	42.9382	1.83869	27.5552	50.6655	-0.0627848	15.2658	27.9539	426.738	-3.08441	0.258011	0.182809	29.147		2	1	7.14286
Serenut 14R	Virginia	2	4	Nakabango	2020B	R2	12	7.3	0.52	0.367543	25.0823	0.279202	41.452	8.18628	23.7383	194.328	-0.868327	22.9614	23.1319	531.142	-38.5241	0.150402	0.110649	26.4316		2	0	0
ICGV-SM 95714	Valencia	2	4	Nakabango	2020B	R2	8	12.2	0.64	0.361947	31.2321	0.303447	41.6438	5.06592	25.7113	130.251	-0.375686	19.1324	25.4516	486.949	-5.95472	0.199961	0.130633	34.6707		2	2	25
ICGV-SM 01731	Virginia	2	4	Nakabango	2020B	R2	8	8.6	0.37	0.36737	21.3736	0.284729	41.1182	11.0167	23.6973	261.065	-1.46436	27.1594	22.4277	609.123	13.0198	0.106767	0.062975	41.0164		2	1	12.5
B7-30-9-3	Spanish	2	4	Nakabango	2020B	R2	14	5.55	0.49	0.388159	25.4823	0.298819	43.9139	9.21906	26.1895	241.443	-0.914729	25.96	25.5667	663.712	-83.2864	0.144322	0.0814866	43.5382		2	11	78.5714
JL 24	Spanish	2	5	Nakabango	2020B	R2	5	7.35	0.48	0.366946	23.0646	0.281876	41.2153	9.65259	23.6761	228.535	-1.15187	25.0999	22.7187	570.237	33.8973	0.101727	0.0433061	57.429		2	2	40
SGV 0047	Virginia	2	5	Nakabango	2020B	R2	9	6.65	0.4	0.367773	22.2897	0.268337	41.1279	9.52509	22.7515	216.71	-1.19849	24.5036	21.9452	537.735	29.1633	0.115677	0.0716401	38.0691		2	0	0
Serenut 6T	Spanish	2	5	Nakabango	2020B	R2	19	8.85	0.56	0.358489	29.3634	0.294056	40.9913	5.86429	24.7065	144.886	-0.490298	19.8185	24.2972	481.535	-7.86977	0.185842	0.113539	38.9054		2	3	15.7895
SGV 0023	Virginia	2	5	Nakabango	2020B	R2	13	6.75	0.55	0.360237	28.7588	0.299851	41.1814	6.46434	25.1244	162.413	-0.555881	20.9022	24.565	513.462	-9.53673	0.173971	0.123601	28.953		2	0	0
ICGV-SM 16501	Spanish	2	5	Nakabango	2020B	R2	13	7.3	0.41	0.361952	25.6478	0.295023	41.0256	8.36231	24.5554	205.34	-0.856425	23.4834	23.6677	555.798	-38.9703	0.139858	0.0896862	35.8732		2	4	30.7692
ICGV-SM 16520	Spanish	2	5	Nakabango	2020B	R2	15	7.6	0.5																	2	3	20
SGV 10005	Spanish	2	5	Nakabango	2020B	R2	13	10.25	0.47	0.371116	23.9633	0.290903	41.8296	9.55467	24.5762	234.817	-1.0679	25.4364	23.638	601.265	60.2072	0.133696	0.103806	22.3564		2	0	0
Serenut 7T	Virginia	2	5	Nakabango	2020B	R2	9	9.1	0.46	0.364934	21.8636	0.289067	40.9375	10.8114	23.9134	258.536	-1.39148	26.903	22.6061	608.174	14.7137	0.107348	0.0741418	30.9334		2	0	0
ICGV 02501	Spanish	2	5	Nakabango	2020B	R2	16	8.45	0.48	0.355598	26.9809	0.312042	40.5975	8.04321	25.4382	204.605	-0.765774	23.2776	24.336	566.485	-22.6456	0.158532	0.108932	31.2873		2	2	12.5
SGV 07010	Virginia	2	5	Nakabango	2020B	R2	9	5.75	0.33	0.370285	18.3233	0.284975	41.1376	13.4074	23.5276	315.445	-2.23152	30.758	21.7855	670.079	6.46513	0.0680141	0.046375	31.8155		2	0	0
Acholi White	Valencia	3	1	Nakabango	2020B	R2	15	10.75	0.5	0.369263	30.6048	0.23331	41.7345	3.34278	21.3655	71.4203	-0.246313	14.899	22.123	329.61	-4.38009	0.200683	0.117729	41.336		2	4	26.6667
ICGV-SM 95714	Valencia	3	1	Nakabango	2020B	R2	12	10.75	0.55	0.346517	29.9348	0.284185	39.6191	5.02667	23.4864	118.058	-0.413847	17.8969	23.1131	413.653	-6.43636	0.177535	0.108207	39.0504		2	3	25
Serenut 5R	Virginia	3	1	Nakabango	2020B	R2	15	5.85	0.55	0.361076	27.3231	0.272468	40.8934	6.38691	23.208	148.227	-0.604554	19.978	22.9204	457.903	-10.6278	0.165527	0.113129	31.6555		2	0	0
SGV 07010	Virginia	3	1	Nakabango	2020B	R2	11	7.1	0.53	0.354761	26.1821	0.265242	40.0368	6.65855	22.3162	148.594	-0.679393	19.8791	21.9088	435.526	-13.4626	0.150448	0.0985191	34.5163		2	0	0
ICGV 01510	Spanish	3	1	Nakabango	2020B	R2	17	13.1	0.65	0.354535	39.5962	0.285903	41.375	0.083135	25.0086	2.07909	0.0707308	11.5958	25.8075	299.259	-2.39311	0.266367	0.202731	23.8905		1	1	5.88235
SGV 0047	Virginia	3	1	Nakabango	2020B	R2	10	6.35	0.42																	2	0	0
RedBeauty	Valencia	3	1	Nakabango	2020B	R2	12	14.4	0.67	0.352815	34.5485	0.287159	40.7607	2.62709	24.4896	64.3365	-0.142337	14.9736	24.7133	370.047	-3.60225	0.238514	0.16469	30.9516		2	5	41.6667
SGV 0075	Virginia	3	1	Nakabango	2020B	R2	5	8.1	0.43	0.349696	18.5938	0.257506	38.7378	11.0133	20.7759	228.811	-1.86077	25.448	19.4211	494.228	8.72701	0.0915087	0.0602915	34.114		2	1	20
ICGV SM 03590	Spanish	3	1	Nakabango	2020B	R2	10	8.6	0.46	0.35699	24.086	0.262533	40.0672	7.8828	22.0164	173.551	-0.909607	21.5633	21.4133	461.741	-49.3869	0.144449	0.104085	27.9436		2	0	0
SGV 0071	Virginia	3	1	Nakabango	2020B	R2	4	7.05	0.37	0.358803	15.9598	0.252003	39.4544	12.7503	20.5965	262.611	-2.65657	28.1203	19.064	536.087	5.73272	0.065216	0.0437041	32.9855		2	0	0
ICGV-SM 08556	Spanish	3	2	Nakabango	2020B	R2	14	10.4	0.48	0.340967	32.6375	0.277354	39.1689	3.30439	23.022	76.0736	-0.222457	15.1664	22.9587	348.2	-4.22248	0.20303	0.139811	31.1379		2	2	14.2857
ICGV 01514	Spanish	3	2	Nakabango	2020B	R2	13	10.95	0.48	0.345452	34.2834	0.255144	39.5986	1.9763	22.0204	43.519	-0.0927865	12.9449	22.4827	291.036	-3.26707	0.214125	0.141985	33.6905		2		0
SGV 0023	Virginia	3	2	Nakabango	2020B	R2	12	9.3	0.55																	2	1	8.33333
ICGV-SM 96714	Valencia	3	2	Nakabango	2020B	R2	16	16.75	0.53	0.346079	35.5169	0.27831	39.9964	1.9057	23.6435	45.0573	-0.0796642	13.5164	23.9598	323.85	-3.18753	0.238317	0.171266	28.1353		2	6	37.5
ICGV 9555	Spanish	3	2	Nakabango	2020B	R2	15	11.75	0.56	0.348895	41.3724	0.276933	40.7754	-0.830871	24.2741	-20.1686	0.14027	9.96263	25.2207	251.265	-2.10254	0.280436	0.19643	29.9555		2	4	26.6667
ICGV-SM 99568	Spanish	3	2	Nakabango	2020B	R2	16	12.6	0.48	0.344991	36.6387	0.286423	40.052	1.49382	24.2173	36.1763	-0.0416316	13.151	24.5289	322.58	-2.96336	0.247825	0.188535	23.9243		2	4	25
ICGV-SM 16502	Spanish	3	2	Nakabango	2020B	R2	6	8.4	0.51	0.352568	22.7384	0.250068	39.3768	8.02925	20.8845	167.687	-1.01467	21.1892	20.2595	429.282	-575.004	0.143154	0.0942622	34.1534		2	1	16.6667
DOK 1T	Spanish	3	2	Nakabango	2020B	R2	7	14.25	0.64	0.353026	28.0408	0.261653	39.9812	5.44512	22.1908	120.831	-0.500982	18.0465	22.033	397.618	-7.83707	0.191943	0.139733	27.2009		2	0	0
ICGV-SM 16501	Spanish	3	2	Nakabango	2020B	R2	9	7.1	0.47	0.369665	22.1335	0.267267	41.3122	9.6025	22.7584	218.538	-1.21539	24.6555	21.9772	541.859	27.1896	0.115213	0.0752317	34.7022		2	3	33.3333
ICGV-SM 16520	Spanish	3	2	Nakabango	2020B	R2	15	9.25	0.51	0.353352	27.8485	0.285104	40.1982	6.39582	23.6865	151.495	-0.590007	20.071	23.1477	464.599	-10.3562	0.175039	0.124569	28.8337		2	7	46.6667
B7-30-9-3	Spanish	3	3	Nakabango	2020B	R2	14	10.1	0.53	0.356131	35.1742	0.29521	41.2783	2.4988	25.2765	63.161	-0.126067	15.1556	25.521	386.787	-3.49101	0.231212	0.124907	45.9773		2	1	7.14286
SGV 0060	Virginia	3	3	Nakabango	2020B	R2	15	6.65	0.55	0.353736	34.81	0.277765	40.7951	2.31201	23.9494	55.3712	-0.115916	14.3191	24.3369	348.481	-3.41773	0.241966	0.149157	38.356		2	0	0
JL 24	Spanish	3	3	Nakabango	2020B	R2	6	6.6	0.58	0.362431	20.4866	0.266973	40.3636	10.5643	22.1931	234.454	-1.51467	25.6922	21.0813	541.626	12.6764	0.0933592	0.049463	47.0186		2	2	33.3333
Serenut 9T	Virginia	3	3	Nakabango	2020B	R2	9	7.9	0.44	0.364346	26.2621	0.274479	41.1765	7.13947	23.407	167.114	-0.711101	21.2181	23.0024	488.068	-15.5232	0.146261	0.0922896	36.9009		2	0	0
12CS-015	Spanish	3	3	Nakabango	2020B	R2	10	8.85	0.65	0.360673	32.2095	0.295877	41.5145	4.2709	25.2343	107.773	-0.29785	17.7585	25.1908	447.351	-4.97485	0.195591	0.118791	39.2656		2	1	10
ICGV-SM 88710	Virginia	3	3	Nakabango	2020B	R2	9	5.6	0.56	0.361262	19.749	0.278064	40.2434	11.6746	22.7757	265.897	-1.76424	27.5986	21.3133	588.217	9.06513	0.0833753	0.0645483	22.581		2	0	0
Serenut 14R	Virginia	3	3	Nakabango	2020B	R2	6	12.05	0.53	0.378799	19.2519	0.261666	41.9811	11.5508	22.5166	260.083	-1.76348	27.6278	21.5132	594.362	9.41249	0.0875202	0.0545669	37.6522		2	0	0
Serenut 4T	Spanish	3	3	Nakabango	2020B	R2	11	11	0.56	0.351979	30.8436	0.228098	39.8084	2.90924	20.2784	58.9946	-0.207875	13.6007	20.8346	283.366	-4.06071	0.225579	0.158425	29.7697		2	5	45.4545
SGV 990400	Virginia	3	3	Nakabango	2020B	R2	12	5.35	0.5	0.359562	27.9491	0.279005	40.8443	6.21635	23.6348	146.922	-0.566427	19.8905	23.3015	463.479	-9.56529	0.18773	0.12914	31.2096		2	3	25
SGV 0080	Virginia	3	3	Nakabango	2020B	R2	8	4.15	0.43	0.356957	17.2937	0.262975	39.444	12.4533	21.3384	265.734	-2.31731	27.9977	19.7581	553.181	6.45832	0.0722048	0.0477677	33.8441		2	0	0
SGV 0084	Virginia	3	4	Nakabango	2020B	R2	14	7.1	0.47	0.36626	22.5025	0.264099	40.9522	9.13034	22.4202	204.704	-1.13792	23.7399	21.7041	515.254	42.91	0.108446	0.0661534	38.9987		2	0	0
SGV 10005	Spanish	3	4	Nakabango	2020B	R2	16	8.25	0.44	0.356858	28.3594	0.275713	40.5529	5.80952	23.3241	135.502	-0.519539	19.1218	23.0528	440.812	-8.35016	0.165962	0.120956	27.1186		2	4	25
ICGV 02501	Spanish	3	4	Nakabango	2020B	R2	15	4.8	0.55	0.35679	27.289	0.277245	40.4584	6.52264	23.2945	151.942	-0.621504	20.1436	22.8605	460.492	-11.3009	0.159883	0.101061	36.7902		2	1	6.66667
SGV 0065	Virginia	3	4	Nakabango	2020B	R2	11	13.85	0.55	0.358461	22.1102	0.259445	40.0267	8.99282	21.6847	195.007	-1.16753	23.0627	20.8952	481.898	36.7945	0.119834	0.0808291	32.549		2	1	9.09091
Serenut 6T	Spanish	3	4	Nakabango	2020B	R2	16	13.85	0.59	0.347383	34.2101	0.280767	40.052	2.65022	23.7395	62.9149	-0.149414	14.6255	23.9064	349.643	-3.65065	0.237345	0.159263	32.898		2	2	12.5
SGV 10010 ER	Spanish	3	4	Nakabango	2020B	R2	10	10.75	0.44	0.357565	27.4832	0.271526	40.5132	6.2052	22.9903	142.66	-0.585344	19.5626	22.6827	443.732	-10.0107	0.17033	0.115646	32.1048		2	1	10
ICGV 01515	Spanish	3	4	Nakabango	2020B	R2	16	12.75	0.64	0.348647	45.5744	0.299388	41.3605	-2.47932	26.1335	-64.7935	0.234987	8.36894	27.2265	227.857	-1.74218	0.314836	0.230103	26.9132		2	1	6.25
DOK 1R	Spanish	3	4	Nakabango	2020B	R2	11	10	0.47	0.360174	27.8469	0.278457	40.8983	6.2653	23.625	148.018	-0.573571	19.9675	23.2966	465.174	-9.76265	0.176737	0.124308	29.6649		1	0	0
ICGV-SM 03702	Virginia	3	4	Nakabango	2020B	R2	8	6.1	0.61	0.361167	22.0152	0.266409	40.3636	9.47136	22.251	210.748	-1.22954	24.0757	21.356	514.16	25.8362	0.123848	0.0918139	25.8655		2		0
SGV 0805	Valencia	3	4	Nakabango	2020B	R2	17	7.05	0.59	0.354392	38.8248	0.294112	41.3846	0.601266	25.4598	15.3081	0.0308397	12.5031	26.0783	326.059	-2.57844	0.270587	0.205228	24.1548		2	4	23.5294
Serenut 8R	Virginia	3	5	Nakabango	2020B	R2	15	6.15	0.5	0.383125	29.3426	0.253963	43.3332	4.8269	23.292	112.428	-0.393207	18.0655	23.8741	431.299	-6.01294	0.185977	0.127391	31.5017		2	0	0
ICGV 01502	Spanish	3	5	Nakabango	2020B	R2	10	10.55	0.51	0.363321	28.0441	0.263974	41.1376	5.65516	22.8677	129.321	-0.511205	18.8005	22.8376	429.358	-8.06791	0.171317	0.114879	32.9436		2	1	10
Serenut 7T	Virginia	3	5	Nakabango	2020B	R2	13	6.25	0.56	0.325334	29.7163	0.300638	37.3572	5.37834	23.2968	125.298	-0.462863	17.9634	22.2974	400.538	-7.36052	0.168216	0.113031	32.8061		2	0	0
Serenut 11T	Virginia	3	5	Nakabango	2020B	R2	11	9.25	0.52	0.352013	31.8388	0.276228	40.3236	3.82284	23.45	89.6456	-0.273701	16.2419	23.5009	381.7	-4.69098	0.188087	0.121112	35.6085		2	1	9.09091
ICGV-SM 01709	Virginia	3	5	Nakabango	2020B	R2	13	7.75	0.58	0.36485	29.2609	0.272574	41.4905	5.29083	23.6186	124.962	-0.444008	18.6205	23.6328	440.055	-6.86144	0.183403	0.126945	30.7837		2	0	0
ICGVS-SM 0205	Spanish	3	5	Nakabango	2020B	R2	15	9.6	0.57	0.34278	34.4613	0.30094	39.7624	2.91395	24.7888	72.2332	-0.167341	15.3577	24.6341	378.324	-3.79429	0.216436	0.159379	26.3621		2	2	13.3333
ICGV-SM 95526	Valencia	3	5	Nakabango	2020B	R2	10	12	0.54	0.348773	29.607	0.268702	39.7062	4.73602	22.5962	107.016	-0.396182	17.1388	22.4521	384.802	-6.11266	0.199115	0.128658	35.3852		2	0	0
ICGV-SM 01731	Virginia	3	5	Nakabango	2020B	R2	13	10.75	0.46	0.355235	32.4905	0.270426	40.6916	3.31932	23.3273	77.4308	-0.220803	15.5174	23.5892	366.042	-4.20056	0.220294	0.152262	30.8823		2	0	0
ICGV-SM 95355	Virginia	3	5	Nakabango	2020B	R2	6	8.1	0.55	0.364317	23.784	0.265146	40.864	8.3086	22.5098	187.025	-0.961583	22.5347	21.9292	494.17	-110.177	0.14897	0.101247	32.0353		2	0	0
ICGV 01504	Spanish	3	5	Nakabango	2020B	R2	15	12.75	0.58	0.364813	33.8084	0.282217	41.9906	2.99634	24.7386	74.1251	-0.175562	15.7724	25.1614	396.854	-3.84385	0.254936	0.176544	30.7498		2	1	6.66667
SGV 10010 ER	Spanish	1	1	NaSARRI	2020B	R4	12	14.15	0.66	0.319962	79.3901	0.221876	39.0172	-11.5665	21.94	-253.769	0.728355	-5.39479	24.7833	-133.701	-0.58979	0.611864	0.42977	29.7605	25.4	3	0	0
Serenut 14R	Virginia	1	1	NaSARRI	2020B	R4	8	20.5	0.77	0.305405	76.24	0.179274	36.2757	-8.88604	17.9556	-159.554	0.710163	-3.34527	20.1657	-67.4596	-0.645442	0.564721	0.448747	20.5365	25.2	3	0	0
DOK 1T	Spanish	1	1	NaSARRI	2020B	R4	6	16	0.6	0.324587	59.4681	0.2033	38.1051	-6.0964	19.4605	-118.639	0.534431	0.82688	21.4219	17.7133	-0.983967	0.412299	0.252132	38.8474	27	3	1	16.6667
ICGV SM 03590	Spanish	1	1	NaSARRI	2020B	R4
ICGV 02501	Spanish	1	1	NaSARRI	2020B	R4	13	25.15	0.65	0.303243	71.1584	0.252462	37.0091	-9.60482	22.4048	-215.195	0.642529	-2.75062	24.2972	-66.8323	-0.732555	0.503581	0.323009	35.8577	26.1	4	0	0
SGV 0080	Virginia	1	1	NaSARRI	2020B	R4	3	18.45	0.54	0.388982	27.6765	0.127605	42.7916	1.12366	14.7343	16.5564	-0.0169275	8.95597	16.4108	146.975	-2.88198	0.09479	0.0514026	45.7722	26.8	3	1	33.3333
JL 24	Spanish	1	1	NaSARRI	2020B	R4	6	21.8	0.61	0.346589	42.9993	0.194301	39.6653	-2.13942	18.8233	-40.271	0.285886	5.97141	20.4536	122.137	-1.64221	0.258947	0.154214	40.4458	26.1	4	1	16.6667
Acholi White	Valencia	1	1	NaSARRI	2020B	R4	15	24.25	0.67	0.32423	70.6422	0.241582	39.2938	-9.65318	22.8171	-220.258	0.636576	-2.62617	25.2644	-66.3486	-0.748972	0.5778	0.368917	36.1514	26.5	4	1	6.66667
ICGV-SM 16502	Spanish	1	1	NaSARRI	2020B	R4	14	25.05	0.72	0.331363	71.6364	0.234242	40.0672	-9.91562	22.7687	-225.766	0.648113	-2.96851	25.4698	-75.6072	-0.730385	0.596132	0.394527	33.8189	24.5	4	1	7.14286
SGV 0060	Virginia	1	1	NaSARRI	2020B	R4	12	23.65	0.74	0.316922	69.8302	0.278874	39.012	-10.1284	24.8636	-251.828	0.618381	-2.59131	26.9674	-69.8808	-0.764956	0.532094	0.353731	33.5209	25.1	3	0	0
SGV 0075	Virginia	1	2	NaSARRI	2020B	R4	13	14.25	0.7	0.339283	69.9433	0.282307	41.7678	-10.8204	26.4992	-286.732	0.616938	-2.89559	29.2265	-84.6278	-0.764774	0.524726	0.35383	32.5685	25.4	3	0	0
ICGV 01502	Spanish	1	2	NaSARRI	2020B	R4	8	28.05	0.56	0.36719	48.1381	0.259002	43.1341	-3.734	24.6404	-92.0072	0.322322	6.23751	26.6937	166.502	-1.4882	0.268054	0.140937	47.422	25.9	4	0	0
SGV 07010	Virginia	1	2	NaSARRI	2020B	R4	15	16.05	0.59	0.384414	47.0381	0.213352	44.3573	-3.50376	22.1056	-77.4526	0.33851	5.69135	24.6772	140.447	-1.46947	0.307219	0.177398	42.2566	26.3	3	1	6.66667
Serenut 5R	Virginia	1	2	NaSARRI	2020B	R4	13	20.5	0.65	0.36602	54.5281	0.246305	43.2474	-5.86594	24.2011	-141.962	0.442008	3.11832	26.7507	83.4173	-1.17199	0.388375	0.234461	39.6303	25.6	3	0	0
12CS-015	Spanish	1	2	NaSARRI	2020B	R4	1	13.9	0.38	0.399307	28.5031	0.185297	44.4009	2.93093	19.1333	56.0784	-0.224496	13.6415	20.6496	281.69	-4.15717	0.0585859	0.0201484	65.6087	27.3	3	0	0
DOK 1R	Spanish	1	2	NaSARRI	2020B	R4	15	26.4	0.54	0.397811	49.5862	0.277251	46.967	-4.52872	27.7724	-125.774	0.332044	6.56277	30.5053	200.199	-1.44605	0.293031	0.147269	49.7431	26.4	4	0	0
B7-30-9-3	Spanish	1	2	NaSARRI	2020B	R4	14	20.35	0.58	0.345707	63.741	0.326981	42.8237	-9.61684	29.4331	-283.053	0.53018	-0.305601	31.6624	-9.67606	-0.920796	0.464535	0.221635	52.2887	26.1	4	0	0
ICGV-SM 08556	Spanish	1	2	NaSARRI	2020B	R4	15	27.95	0.74	0.349054	65.5249	0.302441	42.9428	-9.91655	28.1161	-278.815	0.559355	-1.11777	30.7144	-34.3317	-0.870994	0.513593	0.299945	41.5987	25.5	4	2	13.3333
Serenut 7T	Virginia	1	2	NaSARRI	2020B	R4	9	18.5	0.67	0.378813	51.9975	0.233841	44.3442	-5.11833	23.7523	-121.572	0.409655	4.06007	26.4725	107.48	-1.26141	0.374861	0.238452	36.3894	26	3	0	0
ICGV-SM 01709	Virginia	1	2	NaSARRI	2020B	R4	15	17.35	0.73	0.319801	70.7519	0.244273	38.8224	-9.65746	22.7707	-219.907	0.637634	-2.65824	25.1018	-66.7266	-0.745603	0.533148	0.377741	29.149	24.8	3	0	0
ICGV-SM 95526	Valencia	1	3	NaSARRI	2020B	R4	15	28.35	0.75	0.33314	66.3045	0.370755	42.2818	-11.1238	31.7187	-352.834	0.553063	-1.7069	33.493	-57.1692	-0.850447	0.543572	0.328484	39.5694	28.6	4	0	0
ICGV-SM 95355	Virginia	1	3	NaSARRI	2020B	R4	13	13.95	0.78	0.3637	63.3748	0.202059	42.7456	-7.54028	21.4403	-161.666	0.569721	-0.203989	24.4857	-4.99482	-0.906267	0.510569	0.350918	31.2693	26.6	3	0	0
Serenut 6T	Spanish	1	3	NaSARRI	2020B	R4	16	16.7	0.76	0.325635	70.9369	0.316509	40.8296	-11.6731	28.064	-327.593	0.62219	-3.57695	30.345	-108.543	-0.737875	0.585908	0.366671	37.4183	25.3	4	1	6.25
ICGV-SM 16520	Spanish	1	3	NaSARRI	2020B	R4	16	24.15	0.75	0.332773	75.2732	0.284496	41.4713	-12.6306	26.773	-338.159	0.674721	-5.21082	29.6949	-154.735	-0.654049	0.702676	0.449915	35.9712	25.5	5	0	0
ICGV 01504	Spanish	1	3	NaSARRI	2020B	R4	14	24.45	0.69	0.345385	74.3875	0.255132	42.3285	-11.7672	25.3213	-297.96	0.670395	-4.51642	28.5784	-129.072	-0.676407	0.681655	0.433082	36.4661	25.8	4	1	7.14286
SGV 0805	Valencia	1	3	NaSARRI	2020B	R4	16	24.45	0.79	0.314352	79.3703	0.330818	40.543	-15.2321	29.2059	-444.867	0.714471	-7.89472	31.7753	-250.857	-0.562591	0.706827	0.520407	26.3743	25.9	3	0	0
ICGV-SM 01731	Virginia	1	3	NaSARRI	2020B	R4	3	20.5	0.65	0.350077	42.3519	0.235873	40.4982	-1.61881	21.6942	-35.1189	0.215424	7.86897	23.1031	181.797	-1.84624	0.217987	0.133348	38.8273	27.3	3	0	0
ICGV-SM 95714	Valencia	1	3	NaSARRI	2020B	R4	12	35.9	0.78	0.345809	71.4234	0.309719	43.1885	-12.241	28.9945	-354.922	0.62701	-3.96658	31.9283	-126.646	-0.730771	0.588384	0.378022	35.7525	25.6	4	0	0
Serenut 11T	Virginia	1	3	NaSARRI	2020B	R4	10	22.3	0.8	0.333533	75.6492	0.296274	41.8343	-13.2103	27.7116	-366.078	0.677942	-5.67895	30.6663	-174.153	-0.642314	0.674809	0.494703	26.6899	26.2	3	0	0
Serenut 8R	Virginia	1	3	NaSARRI	2020B	R4	11	24.95	0.78	0.363058	71.3974	0.214143	43.3648	-9.97766	22.9185	-228.673	0.647724	-2.93045	26.4128	-77.4012	-0.740934	0.632158	0.470519	25.5694	24.8	3	0	0
ICGV-SM 99568	Spanish	1	4	NaSARRI	2020B	R4	16	26.8	0.64	0.330266	65.9688	0.27173	40.2133	-9.03997	24.8539	-224.679	0.575457	-1.11675	27.1046	-30.2692	-0.855123	0.496944	0.293624	40.914	26.5	3	2	12.5
ICGV-SM 88710	Virginia	1	4	NaSARRI	2020B	R4	16	23.05	0.82	0.305574	88.9729	0.358718	41.288	-20.7314	31.8618	-660.542	0.810976	-14.1831	34.9937	-496.32	-0.394815	0.878719	0.70125	20.1963	26.8	3	0	0
SGV 0071	Virginia	1	4	NaSARRI	2020B	R4	8	20	0.72	0.359579	68.5739	0.279331	44.0066	-10.7418	27.3899	-294.217	0.600117	-2.42144	30.5865	-74.0634	-0.798785	0.534238	0.376003	29.6187	25.6	3	0	0
SGV 0084	Virginia	1	4	NaSARRI	2020B	R4	14	14.9	0.77	0.299029	85.5701	0.29264	38.4982	-15.9173	26.3326	-419.143	0.782306	-9.5557	29.005	-277.163	-0.466355	0.755282	0.587944	22.1557	25.5	3	0	0
ICGV 01514	Spanish	1	4	NaSARRI	2020B	R4	8	31.2	0.69	0.314975	67.4799	0.281183	38.6475	-9.37489	24.6868	-231.436	0.591807	-1.67454	26.5812	-44.5112	-0.817162	0.518587	0.31565	39.1327	28.7	4	0	0
RedBeauty	Valencia	1	4	NaSARRI	2020B	R4	10	26.65	0.74	0.34673	72.8966	0.295513	43.1613	-12.4908	28.2079	-352.338	0.64706	-4.54231	31.3369	-142.342	-0.699434	0.589841	0.364676	38.1738	26.8	4	1	10
ICGV-SM 03702	Virginia	1	4	NaSARRI	2020B	R4	8	20.85	0.76	0.361101	66.9821	0.246819	43.4637	-9.46154	24.9239	-235.818	0.591291	-1.53286	28.1099	-43.0885	-0.834684	0.527975	0.361346	31.5601	25.6	3	0	0
SGV 0023	Virginia	1	4	NaSARRI	2020B	R4	8	21.65	0.77	0.342887	62.8337	0.251609	41.1619	-7.98506	23.9477	-191.224	0.54566	0.0300528	26.4065	0.793591	-0.92914	0.464041	0.336187	27.5523	25.4	3	0	0
SGV 990400	Virginia	1	4	NaSARRI	2020B	R4	9	28	0.77	0.313693	73.4767	0.30544	39.3872	-11.9927	26.7623	-320.952	0.653638	-4.4275	28.9283	-128.08	-0.684042	0.591374	0.426793	27.8303	25	3	0	0
ICGV-SM 16501	Spanish	1	4	NaSARRI	2020B	R4	9	22.85	0.75	0.337807	67.8081	0.296101	41.6677	-10.3442	27.174	-281.092	0.589029	-2.05061	29.6554	-60.8117	-0.813452	0.491265	0.297713	39.3987	26.2	4	0	0
ICGVS-SM 0205	Spanish	1	5	NaSARRI	2020B	R4	2	16.8	0.55	0.387282	38.0126	0.18411	43.7408	-0.769361	19.4038	-14.9285	0.167133	8.40437	21.5091	180.771	-2.04991	0.18519	0.0905612	51.0982	29.9	4	1	50
ICGV 9555	Spanish	1	5	NaSARRI	2020B	R4	18	26.9	0.72	0.329916	74.3808	0.305038	41.4472	-12.8264	27.9342	-358.295	0.662175	-5.11625	30.6521	-156.824	-0.667309	0.630908	0.399595	36.6635	25.8	4	0	0
SGV 10005	Spanish	1	5	NaSARRI	2020B	R4	13	24.9	0.71	0.375815	61.5297	0.276406	45.3225	-8.57442	27.4986	-235.784	0.516517	0.646516	30.6289	19.8021	-0.977182	0.480049	0.295973	38.3452	26.3	4	0	0
ICGV 01515	Spanish	1	5	NaSARRI	2020B	R4	14	29.5	0.78	0.342235	67.157	0.313294	42.4543	-10.5727	28.5926	-302.3	0.576252	-1.87981	31.0682	-58.4023	-0.83034	0.527221	0.326861	38.0031	24.9	4	0	0
Serenut 4T	Spanish	1	5	NaSARRI	2020B	R4	15	30.9	0.73	0.303962	77.0014	0.424363	40.7656	-16.5087	34.0259	-561.723	0.679493	-8.28493	35.5382	-294.432	-0.585709	0.732021	0.455841	37.7285	25.9	5	0	0
ICGV 01510	Spanish	1	5	NaSARRI	2020B	R4	14	31.8	0.72	0.325555	73.8918	0.305471	40.8787	-12.5409	27.6199	-346.379	0.65795	-4.84959	30.1729	-146.326	-0.675226	0.64567	0.406609	37.0253	26.6	4	0	0
Serenut 9T	Virginia	1	5	NaSARRI	2020B	R4	6	25.35	0.8	0.312654	70.4171	0.245165	37.9637	-9.42514	22.398	-211.104	0.635232	-2.49995	24.5187	-61.2955	-0.75017	0.520232	0.38418	26.1522	26.3	3	0	0
ICGV-SM 96714	Valencia	1	5	NaSARRI	2020B	R4	12	18.95	0.75	0.344555	68.7011	0.320237	42.9884	-11.3785	29.3733	-334.225	0.592958	-2.70127	32.0021	-86.4462	-0.792665	0.584983	0.333621	42.9691	25.6	4	0	0
SGV 0065	Virginia	1	5	NaSARRI	2020B	R4	5	17.7	0.76	0.329551	68.7487	0.230137	39.5986	-8.94218	22.155	-198.114	0.619505	-1.9113	24.6472	-47.1083	-0.788718	0.49129	0.361089	26.502	25.5	3	0	0
SGV 0047	Virginia	1	5	NaSARRI	2020B	R4	9	20.1	0.8	0.349728	69.8945	0.249691	42.3938	-10.2247	24.7643	-253.208	0.623787	-2.64814	27.8382	-73.7197	-0.768272	0.555868	0.431892	22.3032	25.1	3	1	11.1111
ICGV-SM 03702	Virginia	2	1	NaSARRI	2020B	R4	6	17.15	0.79	0.322167	74.2622	0.250946	39.4698	-10.9725	23.6663	-259.678	0.671879	-4.06154	26.2641	-106.673	-0.676844	0.576104	0.417052	27.6082	24.5	3	0	0
Serenut 4T	Spanish	2	1	NaSARRI	2020B	R4	20	23.1	0.8	0.341917	82.195	0.357086	44.9358	-18.7421	33.533	-628.48	0.741139	-11.2468	37.2154	-418.554	-0.504801	0.805275	0.562162	30.19	27.3	5	0	0
ICGV-SM 99568	Spanish	2	1	NaSARRI	2020B	R4	14	25.8	0.76	0.339234	70.3799	0.271472	41.596	-10.6866	25.764	-275.33	0.624109	-2.95865	28.548	-84.4636	-0.75644	0.576314	0.396275	31.2397	26.1	3	0	0
ICGV SM 03590	Spanish	2	1	NaSARRI	2020B	R4	7	19.25	0.8	0.370052	59.5611	0.246859	44.0242	-7.40965	24.837	-184.033	0.505895	1.26124	27.7888	35.0483	-1.01898	0.379936	0.255671	32.7068	24.8	3	0	0
12CS-015	Spanish	2	1	NaSARRI	2020B	R4	2	14.65	0.58	0.31214	51.0392	0.236128	36.6965	-4.19285	20.4585	-85.7794	0.404879	3.62539	21.6166	78.3686	-1.27649	0.291873	0.151345	48.147	26.6	3	0	0
ICGV-SM 16502	Spanish	2	1	NaSARRI	2020B	R4	8	30.65	0.8	0.270667	70.2656	0.309911	33.8654	-9.73771	23.81	-231.855	0.621617	-2.56933	24.4761	-62.8873	-0.745461	0.524244	0.318204	39.3024	26.4	5	2	25
SGV 0805	Valencia	2	1	NaSARRI	2020B	R4	16	29.95	0.78	0.330468	85.5245	0.330467	43.3242	-18.8816	31.2509	-590.066	0.777651	-12.0341	34.9502	-420.595	-0.456733	0.813937	0.59616	26.756	27.1	3	0	0
Serenut 9T	Virginia	2	1	NaSARRI	2020B	R4	8	21.6	0.7	0.328991	64.6595	0.210852	38.9805	-7.47869	20.4949	-153.275	0.585271	-0.586774	22.785	-13.3696	-0.869786	0.470491	0.331741	29.4904	26.3	3	1	12.5
ICGV-SM 08556	Spanish	2	1	NaSARRI	2020B	R4	11	25.5	0.72	0.338313	74.1161	0.27538	41.8628	-12.1073	26.3446	-318.962	0.664471	-4.64755	29.3643	-136.472	-0.677392	0.580931	0.384227	33.8601	27	4	0	0
Serenut 11T	Virginia	2	1	NaSARRI	2020B	R4	10	23.9	0.77	0.320222	79.3518	0.262861	39.8847	-13.0789	24.8879	-325.506	0.722609	-6.39304	27.7712	-177.543	-0.579514	0.656547	0.512568	21.9296	26	3	0	0
ICGV 01502	Spanish	2	2	NaSARRI	2020B	R4	9	27.8	0.76	0.332348	73.3839	0.29606	41.4761	-12.2608	27.3618	-335.478	0.652879	-4.54396	30.1025	-136.784	-0.688947	0.558457	0.367302	34.2293	24.5	4	0	0
SGV 990400	Virginia	2	2	NaSARRI	2020B	R4	8	28.7	0.8	0.309988	90.038	0.186372	37.8545	-13.0365	19.8283	-258.491	0.828971	-7.93354	22.9048	-181.716	-0.438819	0.769429	0.591195	23.1645	24.5	3	1	12.5
SGV 0071	Virginia	2	2	NaSARRI	2020B	R4	9	19.85	0.8	0.328632	75.6405	0.181316	38.9962	-9.29806	19.1187	-177.767	0.700148	-3.44885	21.8778	-75.4532	-0.662027	0.611521	0.4285	29.9289	25	3	0	0
ICGV 01510	Spanish	2	2	NaSARRI	2020B	R4	16	25.4	0.74	0.303251	81.3048	0.329847	39.3405	-15.6663	28.5587	-447.41	0.73704	-8.63233	30.9487	-267.159	-0.525279	0.746673	0.497957	33.3098	26.8	4	0	0
ICGV-SM 95355	Virginia	2	2	NaSARRI	2020B	R4	14	15.6	0.8	0.30633	80.1601	0.28767	38.7484	-13.7814	25.8163	-355.786	0.728189	-7.01381	28.304	-198.519	-0.558684	0.665834	0.47284	28.9853	26.3	3	0	0
DOK 1R	Spanish	2	2	NaSARRI	2020B	R4	8	28.85	0.6	0.336655	53.5544	0.237715	39.7011	-5.1617	22.0037	-113.576	0.437538	3.07257	23.85	73.2807	-1.19034	0.348807	0.182287	47.7397	25.7	4	1	12.5
ICGVS-SM 0205	Spanish	2	2	NaSARRI	2020B	R4	5	21.6	0.69	0.316949	61.0374	0.17814	36.9186	-5.92013	17.5193	-103.717	0.566308	0.300542	19.3934	5.82855	-0.930378	0.432815	0.259497	40.0444	28.1	4	1	20
Serenut 8R	Virginia	2	2	NaSARRI	2020B	R4	12	19.25	0.81	0.325157	84.1376	0.245472	40.543	-14.3586	24.4637	-351.264	0.771357	-8.16894	27.8318	-227.357	-0.504392	0.695375	0.525834	24.3813	29.7	3	0	0
SGV 10010 ER	Spanish	2	2	NaSARRI	2020B	R4	8	21.3	0.74	0.312202	78.1191	0.226106	38.0834	-11.1216	21.7186	-241.546	0.716404	-4.89972	24.2757	-118.944	-0.608972	0.624555	0.456025	26.984	27.9	3	0	0
SGV 0060	Virginia	2	2	NaSARRI	2020B	R4	12	22.8	0.77	0.314961	74.6402	0.267402	38.9384	-11.4019	24.4061	-278.275	0.67387	-4.39071	26.8037	-117.687	-0.665115	0.602205	0.423203	29.7245	29.4	3	0	0
DOK 1T	Spanish	2	3	NaSARRI	2020B	R4	1	8	0.62	0.35157	36.6709	0.11582	39.0748	-1.36161	13.3751	-18.2117	0.30014	4.72103	14.9955	70.7942	-1.66008	0.20263	0.118596	41.4716	29.3	3	0	0
ICGV-SM 88710	Virginia	2	3	NaSARRI	2020B	R4	14	25.25	0.73	0.285675	85.8214	0.288529	36.7422	-15.3015	25.1332	-384.574	0.786853	-9.09064	27.3933	-249.022	-0.461602	0.768569	0.578947	24.6721	29.2	3	0	0
SGV 0065	Virginia	2	3	NaSARRI	2020B	R4	11	18.2	0.7	0.315152	78.4059	0.259203	39.1115	-12.4486	24.2141	-301.431	0.71416	-5.79568	26.8825	-155.803	-0.596435	0.643147	0.447343	30.4446	26.7	3	0	0
RedBeauty	Valencia	2	3	NaSARRI	2020B	R4	9	16.5	0.77	0.313238	78.7368	0.344725	40.6124	-15.361	29.9599	-460.215	0.706421	-7.85316	32.3884	-254.351	-0.570668	0.71333	0.446902	37.3499	24	4	0	0
ICGV 9555	Spanish	2	3	NaSARRI	2020B	R4	15	27.35	0.78	0.302212	76.1515	0.326635	38.605	-13.2922	27.6382	-367.371	0.681709	-5.86671	29.5778	-173.524	-0.623169	0.633169	0.428561	32.3149	25.6	4	0	0
ICGV-SM 95526	Valencia	2	3	NaSARRI	2020B	R4	12	24.65	0.74	0.335729	71.0935	0.325029	42.2304	-12.2329	29.3488	-359.022	0.62153	-3.88499	31.8992	-123.928	-0.734397	0.627504	0.355972	43.2718	24.1	4	1	8.33333
ICGV 01504	Spanish	2	3	NaSARRI	2020B	R4	12	31.4	0.76	0.304055	78.2829	0.309755	38.7219	-13.693	26.9323	-368.783	0.705964	-6.57799	29.1506	-191.752	-0.587352	0.699278	0.454167	35.052	24.5	4	0	0
SGV 0080	Virginia	2	3	NaSARRI	2020B	R4	5	16.95	0.72	0.372772	63.6958	0.237332	44.4226	-8.48427	24.575	-208.501	0.556927	-0.287745	27.8599	-8.01655	-0.91164	0.474239	0.300704	36.5922	23.2	3	0	0
ICGV-SM 01709	Virginia	2	3	NaSARRI	2020B	R4	9	22.9	0.74	0.311133	79.0928	0.224196	37.9856	-11.2947	21.5975	-243.938	0.725518	-5.15982	24.1774	-124.751	-0.59391	0.616789	0.452898	26.5717	23	3	0	0
SGV 0075	Virginia	2	3	NaSARRI	2020B	R4	13	28.75	0.78	0.309935	83.025	0.299471	39.7369	-15.5467	27.2106	-423.035	0.756293	-8.85714	30.0281	-265.963	-0.505725	0.752291	0.562988	25.1635	23.2	3	0	0
Serenut 5R	Virginia	2	4	NaSARRI	2020B	R4	13	21	0.71	0.357992	73.4968	0.239996	43.4413	-11.3209	24.8176	-280.958	0.663511	-4.06865	28.3569	-115.375	-0.69672	0.638226	0.419954	34.1997	24.9	3	1	7.69231
SGV 0084	Virginia	2	4	NaSARRI	2020B	R4	9	23.7	0.73	0.309876	74.9207	0.264393	38.2889	-11.2873	23.9174	-269.963	0.678768	-4.40589	26.1972	-115.422	-0.657889	0.641241	0.434382	32.2592	25	3	0	0
ICGV-SM 96714	Valencia	2	4	NaSARRI	2020B	R4	15	20.95	0.77	0.283557	76.5678	0.361983	36.9186	-13.7674	28.4899	-392.231	0.68277	-6.26743	29.6862	-186.056	-0.606673	0.689165	0.416345	39.5871	23.4	4	1	6.66667
ICGV 01515	Spanish	2	4	NaSARRI	2020B	R4	11	30.05	0.68	0.327623	66.7758	0.255127	39.6755	-8.91603	23.6302	-210.688	0.591185	-1.37662	25.9176	-35.6788	-0.832007	0.530497	0.315327	40.5602	23.6	4	0	0
Acholi White	Valencia	2	4	NaSARRI	2020B	R4	13	17.3	0.74	0.294461	75.3063	0.328462	37.5793	-12.7282	27.0879	-344.78	0.672685	-5.31967	28.7126	-152.741	-0.639209	0.642067	0.425566	33.7194	25.5	4	1	7.69231
ICGV 01514	Spanish	2	4	NaSARRI	2020B	R4	10	27.35	0.57	0.324613	64.0639	0.210777	38.4394	-7.24159	20.2464	-146.616	0.578602	-0.381153	22.3982	-8.53716	-0.883836	0.470002	0.256377	45.452	25.6	4	1	10
Serenut 14R	Virginia	2	4	NaSARRI	2020B	R4	14	23.3	0.82	0.309971	78.8099	0.264188	38.6103	-12.5955	24.2876	-305.914	0.717761	-5.96279	26.8244	-159.948	-0.587844	0.686322	0.508079	25.9708	24.4	3	0	0
ICGV-SM 95714	Valencia	2	4	NaSARRI	2020B	R4	8	28.75	0.75	0.30587	68.3183	0.264591	37.3349	-9.06219	23.1207	-209.524	0.606469	-1.81321	24.8783	-45.1095	-0.796818	0.484565	0.285983	40.9815	27	4	2	25
ICGV-SM 01731	Virginia	2	4	NaSARRI	2020B	R4	7	17.7	0.64	0.321802	50.3231	0.203937	37.3628	-3.93657	18.8282	-74.1187	0.415452	3.40951	20.3083	69.2415	-1.26924	0.308909	0.186997	39.4653	27.5	3	1	14.2857
B7-30-9-3	Spanish	2	4	NaSARRI	2020B	R4	8	15.45	0.61	0.311914	68.1494	0.233706	37.5406	-8.49833	21.4084	-181.936	0.614644	-1.64125	23.4086	-38.4194	-0.797216	0.486267	0.271678	44.1297	27.1	4	2	25
JL 24	Spanish	2	5	NaSARRI	2020B	R4	8	12.25	0.72	0.302942	80.0083	0.385192	40.2585	-16.8667	31.937	-538.673	0.717486	-9.27097	33.9605	-314.847	-0.535581	0.78111	0.490323	37.2275	25.1	4	0	0
SGV 0047	Virginia	2	5	NaSARRI	2020B	R4	10	17.55	0.81	0.30942	81.4224	0.354879	40.652	-16.8281	30.7108	-516.804	0.734589	-9.53478	33.2218	-316.763	-0.518483	0.757325	0.570475	24.6723	24.7	3	0	0
Serenut 6T	Spanish	2	5	NaSARRI	2020B	R4	17	20.4	0.78	0.30717	72.5774	0.339986	39.1219	-12.3682	28.456	-351.95	0.639258	-4.43166	30.2018	-133.844	-0.695137	0.642974	0.401071	37.6224	24.9	4	0	0
SGV 0023	Virginia	2	5	NaSARRI	2020B	R4	6	25.5	0.83	0.333276	53.3972	0.178315	38.4768	-4.634	17.8277	-82.6138	0.480271	2.16016	19.76	42.6848	-1.12475	0.424134	0.299337	29.4239	24.6	3	0	0
ICGV-SM 16501	Spanish	2	5	NaSARRI	2020B	R4	11	24.95	0.78	0.311224	74.2414	0.338445	39.7624	-13.1414	28.852	-379.155	0.65784	-5.30483	30.8603	-163.709	-0.660712	0.623621	0.36263	41.8509	25.6	4	0	0
ICGV-SM 16520	Spanish	2	5	NaSARRI	2020B	R4	12	34	0.76	0.310309	80.055	0.34432	40.3836	-15.8434	29.887	-473.511	0.720875	-8.49509	32.34	-274.731	-0.546071	0.733727	0.447867	38.9599	25.2	4	0	0
SGV 10005	Spanish	2	5	NaSARRI	2020B	R4	10	23.3	0.69	0.298913	61.3505	0.245852	35.8067	-6.72876	21.0225	-141.455	0.537629	0.45532	22.3195	10.1625	-0.952355	0.450611	0.242837	46.1094	27.9	3	1	10
Serenut 7T	Virginia	2	5	NaSARRI	2020B	R4	12	20.75	0.79	0.33819	74.5878	0.236901	41.1328	-11.0565	23.5917	-260.842	0.676418	-4.16996	26.6569	-111.158	-0.67512	0.591892	0.449219	24.1044	24.9	3	0	0
ICGV 02501	Spanish	2	5	NaSARRI	2020B	R4	15	27.4	0.77	0.345062	68.2914	0.297203	42.598	-10.7346	27.7483	-297.868	0.594416	-2.35425	30.469	-71.7317	-0.80166	0.566812	0.353142	37.6968	24.1	4	1	6.66667
SGV 07010	Virginia	2	5	NaSARRI	2020B	R4	9	14.5	0.76	0.317052	71.5574	0.239716	38.4715	-9.7403	22.3876	-218.062	0.648414	-2.90008	24.7008	-71.6343	-0.727275	0.574092	0.403452	29.7234	24.6	3	0	0
Acholi White	Valencia	3	1	NaSARRI	2020B	R4	11	24.05	0.7	0.326199	75.2109	0.297628	40.9277	-12.8463	27.2645	-350.248	0.673609	-5.3547	29.9631	-160.443	-0.65005	0.596581	0.372159	37.6181	25.9	4	1	9.09091
ICGV-SM 95714	Valencia	3	1	NaSARRI	2020B	R4	15	18	0.75	0.319096	87.939	0.29452	41.346	-17.9409	28.1805	-505.584	0.803918	-11.6433	31.7361	-369.512	-0.430218	0.774742	0.57718	25.5004	25.8	4	1	6.66667
Serenut 5R	Virginia	3	1	NaSARRI	2020B	R4	16	22.6	0.84	0.305076	87.0685	0.248799	38.4394	-14.871	23.8266	-354.324	0.799594	-8.9754	26.7951	-240.497	-0.457425	0.730451	0.581894	20.3377	24.3	3	0	0
SGV 07010	Virginia	3	1	NaSARRI	2020B	R4	7	34.45	0.78	0.291434	75.1303	0.206702	35.0442	-9.11995	19.0513	-173.747	0.693831	-3.26589	20.8803	-68.1927	-0.660713	0.503873	0.373312	25.9114	24.8	3	0	0
ICGV 01510	Spanish	3	1	NaSARRI	2020B	R4	14	19.5	0.7	0.279967	74.0202	0.272165	34.6883	-10.3374	22.4681	-232.262	0.670744	-3.69897	23.8072	-88.0622	-0.670319	0.545477	0.334316	38.7112	25	4	2	14.2857
SGV 0047	Virginia	3	1	NaSARRI	2020B	R4	8	23.15	0.73	0.316713	70.0979	0.15971	36.9582	-7.20432	16.7	-120.312	0.658868	-1.65854	18.8749	-31.3048	-0.753078	0.525934	0.358939	31.752	24	3	0	0
RedBeauty	Valencia	3	1	NaSARRI	2020B	R4	11	24.9	0.75	0.301888	78.9741	0.351615	39.3353	-15.2606	29.5665	-451.204	0.709651	-7.84462	31.6216	-248.059	-0.562864	0.727059	0.455757	37.315	25.1	4	0	0
SGV 0075	Virginia	3	1	NaSARRI	2020B	R4	14	28.45	0.85	0.296788	88.6121	0.336421	39.5626	-19.0824	29.5478	-563.844	0.809281	-12.6608	32.3673	-409.796	-0.406415	0.818764	0.642436	21.536	24.8	3	0	0
ICGV SM 03590	Spanish	3	1	NaSARRI	2020B	R4	10	23.1	0.84	0.315857	88.9515	0.227583	39.4544	-14.9855	23.1403	-346.77	0.817134	-9.35507	26.5241	-248.134	-0.438432	0.790109	0.630442	20.2082	22.9	3	0	0
SGV 0071	Virginia	3	1	NaSARRI	2020B	R4	12	18.8	0.76	0.298747	84.582	0.250245	37.4518	-13.7655	23.2537	-320.1	0.77674	-7.74713	25.8476	-200.245	-0.494309	0.690324	0.537389	22.154	24.4	3	1	8.33333
ICGV-SM 08556	Spanish	3	2	NaSARRI	2020B	R4	14	30.35	0.71	0.323384	76.8119	0.351176	41.7963	-15.0484	30.9161	-465.237	0.683427	-7.16584	33.4624	-239.786	-0.607678	0.691348	0.413964	40.1222	25	4	0	0
ICGV 01514	Spanish	3	2	NaSARRI	2020B	R4	13	21.2	0.75	0.292035	74.9442	0.305626	36.8391	-11.913	25.4509	-303.195	0.673184	-4.76418	27.079	-129.009	-0.648988	0.640698	0.383722	40.1087	25.1	4	0	0
SGV 0023	Virginia	3	2	NaSARRI	2020B	R4	10	20.65	0.77	0.298447	83.747	0.262144	37.5904	-13.9302	23.9759	-333.989	0.767498	-7.73806	26.5047	-205.095	-0.504122	0.707789	0.52455	25.8889	27.5	3	0	0
ICGV-SM 96714	Valencia	3	2	NaSARRI	2020B	R4	16	24.85	0.77	0.306619	81.7962	0.255171	38.2782	-13.2325	23.7817	-314.691	0.748799	-6.92649	26.4264	-183.042	-0.538526	0.762589	0.519682	31.8529	27.5	4	0	0
ICGV 9555	Spanish	3	2	NaSARRI	2020B	R4	13	33.5	0.75	0.296731	73.5299	0.325674	37.6511	-12.0277	26.8888	-323.41	0.652747	-4.47957	28.4622	-127.498	-0.677119	0.595701	0.365506	38.6427	29.6	4	0	0
ICGV-SM 99568	Spanish	3	2	NaSARRI	2020B	R4	10	29	0.74	0.274669	75.7705	0.305466	34.7253	-11.5888	24.3182	-281.818	0.682189	-4.71307	25.4653	-120.02	-0.633523	0.628445	0.406219	35.3614	30.9	3	0	0
ICGV-SM 16502	Spanish	3	2	NaSARRI	2020B	R4	12	24.7	0.79	0.288412	82.2855	0.403647	39.0329	-17.9836	32.1767	-578.655	0.742123	-10.6301	33.837	-359.69	-0.488417	0.806257	0.520352	35.4608	30.5	4	0	0
DOK 1T	Spanish	3	2	NaSARRI	2020B	R4	8	28.1	0.6	0.291047	75.3922	0.282814	36.3512	-11.3771	23.9739	-272.752	0.680977	-4.52885	25.6819	-116.309	-0.645708	0.645965	0.382221	40.8294	32	3	0	0
ICGV-SM 16501	Spanish	3	2	NaSARRI	2020B	R4	11	12	0.66	0.309162	68.8748	0.304961	38.4501	-10.2269	26.0013	-265.914	0.60314	-2.38786	27.7177	-66.186	-0.782171	0.507478	0.263331	48.1098	32.7	4	0	0
ICGV-SM 16520	Spanish	3	2	NaSARRI	2020B	R4	14	24.4	0.71	0.326401	68.3582	0.337154	41.0597	-11.133	29.2351	-325.475	0.586589	-2.50454	31.2199	-78.1916	-0.798151	0.542428	0.274677	49.3615	31.5	5	0	0
B7-30-9-3	Spanish	3	3	NaSARRI	2020B	R4	15	24.1	0.64	0.304604	73.0691	0.210766	36.5704	-9.04894	19.8329	-179.467	0.672578	-2.89966	21.9137	-63.5423	-0.697858	0.574853	0.322471	43.9038	29.6	4	2	13.3333
SGV 0060	Virginia	3	3	NaSARRI	2020B	R4	13	24.4	0.66	0.284994	72.7472	0.26139	35.0442	-9.80832	21.9995	-215.778	0.658887	-3.17503	23.4474	-74.4463	-0.697708	0.560785	0.355066	36.684	29.4	3	0	0
JL 24	Spanish	3	3	NaSARRI	2020B	R4	17	19.25	0.72	0.293107	82.8801	0.347069	38.5783	-16.5545	29.1172	-482.021	0.752255	-9.60044	31.247	-299.985	-0.493377	0.773205	0.5113	33.8726	30.2	4	0	0
Serenut 9T	Virginia	3	3	NaSARRI	2020B	R4	2	18.85	0.57	0.295354	52.541	0.199422	34.3586	-4.18221	17.4608	-73.0249	0.457731	2.42086	18.4906	44.7633	-1.16648	0.312072	0.193284	38.0644	31	3	0	0
12CS-015	Spanish	3	3	NaSARRI	2020B	R4	4	24.8	0.58	0.300218	61.7759	0.24916	36.0364	-6.90862	21.3315	-147.371	0.540944	0.336537	22.6682	7.6287	-0.943128	0.408404	0.221412	45.7861	31	3	2	50
ICGV-SM 88710	Virginia	3	3	NaSARRI	2020B	R4	7	22.5	0.67	0.288938	77.1473	0.195279	34.6635	-9.23767	18.3095	-169.137	0.717247	-3.66327	20.169	-73.8844	-0.624418	0.512488	0.337819	34.0826	30.6	3	0	0
Serenut 14R	Virginia	3	3	NaSARRI	2020B	R4	3	14.9	0.72	0.290586	55.976	0.210888	34.1006	-4.99537	18.1333	-90.5823	0.49695	1.60802	19.1546	30.8008	-1.06557	0.357907	0.243189	32.0523	32.6	3	0	0
Serenut 4T	Spanish	3	3	NaSARRI	2020B	R4	19	27.15	0.73	0.29444	77.4207	0.428111	39.6448	-16.4413	33.4601	-550.127	0.685298	-8.36277	34.679	-290.012	-0.574823	0.733395	0.442569	39.6548	26.9	5	0	0
SGV 990400	Virginia	3	3	NaSARRI	2020B	R4	13	31.3	0.74	0.292467	82.0196	0.312044	37.6842	-14.8757	26.6822	-396.917	0.746075	-8.14467	28.822	-234.745	-0.518279	0.725835	0.528386	27.203	28.3	3	0	0
SGV 0080	Virginia	3	3	NaSARRI	2020B	R4	15	23.35	0.83	0.301001	87.3183	0.164021	36.0774	-10.8361	17.4733	-189.343	0.807665	-5.94975	20.0202	-119.115	-0.48463	0.715667	0.558006	22.0299	29.1	3	0	0
SGV 0084	Virginia	3	4	NaSARRI	2020B	R4	14	18.2	0.71	0.313327	70.1915	0.232902	37.8161	-9.07002	21.5772	-195.706	0.636391	-2.31685	23.7243	-54.9655	-0.754681	0.494317	0.32861	33.5225	28	3	1	7.14286
SGV 10005	Spanish	3	4	NaSARRI	2020B	R4	13	27.95	0.65	0.316831	61.8591	0.228808	37.7007	-6.89615	20.9317	-144.348	0.547813	0.286132	22.7556	6.5111	-0.939166	0.369716	0.22049	40.3624	29.5	3	1	7.69231
ICGV 02501	Spanish	3	4	NaSARRI	2020B	R4	14	30.7	0.62	0.295946	71.5247	0.285154	36.6965	-10.2933	24.0912	-247.977	0.638319	-3.11013	25.6888	-79.8955	-0.724142	0.536128	0.310354	42.112	28.2	4	0	0
SGV 0065	Virginia	3	4	NaSARRI	2020B	R4	14	13.95	0.68	0.297595	76.1267	0.249899	36.6221	-10.8685	22.3238	-242.626	0.694221	-4.39067	24.345	-106.891	-0.637427	0.577174	0.410931	28.803	28.7	3	1	7.14286
Serenut 6T	Spanish	3	4	NaSARRI	2020B	R4	13	25.1	0.62	0.301803	74.1688	0.265992	37.279	-10.8211	23.4738	-254.012	0.669847	-3.96255	25.4621	-100.895	-0.673781	0.563898	0.328488	41.747	30.1	4	1	7.69231
SGV 10010 ER	Spanish	3	4	NaSARRI	2020B	R4	14	23.75	0.63	0.302236	67.3111	0.22829	36.2583	-7.97269	20.4834	-163.308	0.609225	-1.31097	22.2046	-29.1096	-0.811469	0.49966	0.337922	32.3696	31	3	1	7.14286
ICGV 01515	Spanish	3	4	NaSARRI	2020B	R4	13	29.5	0.75	0.279496	75.3656	0.350752	36.0774	-12.8328	27.3512	-350.993	0.671755	-5.40826	28.3934	-153.559	-0.631726	0.634682	0.368949	41.8688	27	4	0	0
DOK 1R	Spanish	3	4	NaSARRI	2020B	R4	11	31.85	0.73	0.319215	72.0252	0.159271	37.3237	-7.64064	16.8796	-128.971	0.67716	-2.14667	19.1883	-41.191	-0.718229	0.510048	0.353576	30.6779	27	4	0	0
ICGV-SM 03702	Virginia	3	4	NaSARRI	2020B	R4	10	22.45	0.63	0.300193	63.2829	0.220134	35.6822	-6.81728	19.591	-133.557	0.570432	-0.151625	21.0988	-3.19912	-0.896485	0.42631	0.291734	31.5676	30.4	3	0	0
SGV 0805	Valencia	3	4	NaSARRI	2020B	R4	16	32.25	0.61	0.288713	71.3061	0.29608	35.9718	-10.2695	24.2782	-249.326	0.634051	-3.04228	25.6063	-77.9015	-0.727321	0.542174	0.306214	43.5211	29	3	0	0
Serenut 8R	Virginia	3	5	NaSARRI	2020B	R4	14	21.1	0.74	0.285204	74.0175	0.25952	35.1294	-10.1467	22.0158	-223.388	0.672246	-3.59331	23.544	-84.6009	-0.673507	0.529376	0.353638	33.1971	27.3	3	0	0
ICGV 01502	Spanish	3	5	NaSARRI	2020B	R4	9	30.5	0.66	0.292698	64.3858	0.282359	35.7712	-7.99461	23.1224	-184.855	0.560115	-0.494795	24.236	-11.9918	-0.883813	0.44833	0.237536	47.0176	26.7	4	0	0
Serenut 7T	Virginia	3	5	NaSARRI	2020B	R4	13	24.7	0.64	0.291806	67.9188	0.228149	35.0442	-7.89773	19.953	-157.583	0.616812	-1.4251	21.4345	-30.5462	-0.79672	0.482432	0.316424	34.4106	27.9	3	0	0
Serenut 11T	Virginia	3	5	NaSARRI	2020B	R4	11	20.9	0.65	0.309297	65.859	0.19493	36.4898	-7.04851	18.5598	-130.819	0.604962	-0.787587	20.432	-16.0919	-0.839098	0.424598	0.296617	30.1417	27.9	3	0	0
ICGV-SM 01709	Virginia	3	5	NaSARRI	2020B	R4	12	21.8	0.65	0.294555	65.1088	0.203121	34.8546	-6.82637	18.3329	-125.147	0.598362	-0.625695	19.8211	-12.402	-0.848397	0.473555	0.329364	30.4486	28.3	3	0	0
ICGVS-SM 0205	Spanish	3	5	NaSARRI	2020B	R4	3	32.5	0.5	0.299518	45.3547	0.226507	34.8054	-2.49421	18.8456	-47.0048	0.312824	5.14945	19.4848	100.336	-1.54116	0.228492	0.105318	53.9072	29.4	4	1	33.3333
ICGV-SM 95526	Valencia	3	5	NaSARRI	2020B	R4	11	33.75	0.65	0.287341	70.5859	0.290578	35.6584	-9.86897	23.7759	-234.644	0.62745	-2.69307	25.0474	-67.4545	-0.743005	0.506415	0.260746	48.5115	29.1	4	0	0
ICGV-SM 01731	Virginia	3	5	NaSARRI	2020B	R4	5	18.15	0.46	0.303206	42.5856	0.190733	34.7006	-1.87987	16.6904	-31.3758	0.29431	5.14052	17.4804	89.8584	-1.62077	0.234673	0.136388	41.8817	28.8	3	0	0
ICGV-SM 95355	Virginia	3	5	NaSARRI	2020B	R4	7	13.45	0.53	0.296716	49.5824	0.217311	34.5954	-3.58782	18.4318	-66.1302	0.3986	3.55553	19.2781	68.5438	-1.30564	0.279937	0.16794	40.0079	27.4	3	0	0
ICGV 01504	Spanish	3	5	NaSARRI	2020B	R4	10	31.55	0.62	0.299515	66.1765	0.310922	37.1556	-9.15353	25.4722	-233.161	0.570011	-1.20558	26.7032	-32.1928	-0.847411	0.502437	0.27528	45.211	28.4	4	0	0
SGV 10010 ER	Spanish	1	1	Nakabango	2020B	R4	9	11	0.74	0.325492	48.7517	0.193284	37.5738	-3.55991	18.2025	-64.7994	0.400652	3.68471	19.7255	72.6827	-1.31509	0.296952	0.254254	14.3788	32.7			0
Serenut 14R	Virginia	1	1	Nakabango	2020B	R4	7	17.55	0.87	0.317786	68.393	0.218112	37.991	-8.32385	20.6949	-172.261	0.621203	-1.64734	22.8773	-37.6868	-0.792566	0.383421	0.355718	7.22526	30.8			0
DOK 1T	Spanish	1	1	Nakabango	2020B	R4	3	10.75	0.76	0.33475	12.9607	0.127469	36.1651	5.52223	12.0841	66.7312	-1.19606	13.2532	12.0921	160.26	151.099	0.130435	0.112558	13.7057	35.5			0
ICGV SM 03590	Spanish	1	1	Nakabango	2020B	R4	11	17.5	0.79	0.317418	64.7335	0.270038	38.5783	-8.38271	23.8841	-200.214	0.564088	-0.633391	25.7294	-16.2967	-0.880612	0.37727	0.341203	9.55993	30			0
ICGV 02501	Spanish	1	1	Nakabango	2020B	R4	15	21.75	0.79	0.331106	87.8822	0.266963	42.1647	-17.1014	26.9256	-460.467	0.804026	-10.9546	30.832	-337.752	-0.441199	0.572332	0.524559	8.34704	34.7			0
SGV 0080	Virginia	1	1	Nakabango	2020B	R4	6	17.1	0.8	0.32634	62.8372	0.215682	38.6582	-7.05917	20.5936	-145.374	0.562541	-0.0106788	22.7214	-0.242639	-0.914826	0.370762	0.324289	12.5344	29.2			0
JL 24	Spanish	1	1	Nakabango	2020B	R4	7	22.55	0.82	0.329816	31.4589	0.19779	37.1332	1.70847	17.4428	29.8004	-0.0846723	10.4654	17.9861	188.232	-3.22176	0.216305	0.177797	17.8029	34.7			0
Acholi White	Valencia	1	1	Nakabango	2020B	R4	9	24.5	0.74	0.31677	66.8223	0.244832	38.2242	-8.47376	22.329	-189.211	0.595782	-1.27978	24.3594	-31.1748	-0.82884	0.399193	0.336561	15.6896	29.6			0
ICGV-SM 16502	Spanish	1	1	Nakabango	2020B	R4	9	21.1	0.82	0.33268	65.3694	0.255307	40.1831	-8.58322	23.8279	-204.521	0.573654	-0.850931	26.1584	-22.259	-0.867835	0.383552	0.336336	12.3101	30.1			0
SGV 0060	Virginia	1	1	Nakabango	2020B	R4	12	19.75	0.84	0.32669	71.9563	0.267269	40.1428	-10.8114	24.8738	-268.919	0.643931	-3.44969	27.4251	-94.6081	-0.720801	0.434049	0.372403	14.2025	28.5			0
SGV 0075	Virginia	1	2	Nakabango	2020B	R4	12	21	0.87	0.334964	94.1904	0.266135	43.4233	-20.2191	28.0813	-567.777	0.860808	-14.6203	32.7127	-478.269	-0.353639	0.598908	0.560669	6.3848	27.7			0
ICGV 01502	Spanish	1	2	Nakabango	2020B	R4	9	26.6	0.85	0.339931	47.5481	0.191694	39.1271	-3.35778	18.655	-62.6393	0.378728	4.21887	20.4164	86.134	-1.37434	0.294524	0.259965	11.734	26.4			0
SGV 07010	Virginia	1	2	Nakabango	2020B	R4	11	15.3	0.83	0.331601	73.9573	0.17668	39.1637	-8.80082	18.8017	-165.471	0.685311	-2.91909	21.5361	-62.8657	-0.692079	0.438552	0.400848	8.59758	29.4			0
Serenut 5R	Virginia	1	2	Nakabango	2020B	R4	17	18.35	0.82	0.376615	83.7231	0.152157	44.3399	-11.2713	19.4697	-219.449	0.773216	-5.90889	23.6277	-139.613	-0.547501	0.50982	0.478965	6.05209	26.9			0
12CS-015	Spanish	1	2	Nakabango	2020B	R4	7	13.25	0.72	0.326771	30.5893	0.189813	36.6793	1.81054	16.7789	30.3788	-0.101518	10.2856	17.2798	177.733	-3.32308	0.200003	0.15638	21.8111	31.7			0
DOK 1R	Spanish	1	2	Nakabango	2020B	R4	13	26.25	0.83	0.324081	88.9732	0.310554	42.5053	-19.4349	29.8713	-580.548	0.812421	-13.099	33.7078	-441.537	-0.41017	0.608109	0.536258	11.8155	28.9			0
B7-30-9-3	Spanish	1	2	Nakabango	2020B	R4	13	17.1	0.68	0.3534	51.1768	0.175887	40.6075	-4.30444	18.3584	-79.0227	0.448335	2.90293	20.6048	59.8145	-1.2035	0.335475	0.285792	14.8098	30.1			0
ICGV-SM 08556	Spanish	1	2	Nakabango	2020B	R4	16	27.25	0.62	0.360473	61.3516	0.153068	41.4616	-6.11964	17.5026	-107.109	0.578311	0.155382	20.277	3.15069	-0.920023	0.376603	0.325406	13.5943	32			0
Serenut 7T	Virginia	1	2	Nakabango	2020B	R4	10	17.8	0.83	0.347218	83.7823	0.253596	43.3648	-15.3293	26.3678	-404.201	0.764891	-8.85366	30.3962	-269.117	-0.510375	0.527055	0.475911	9.70357	29.3			0
ICGV-SM 01709	Virginia	1	2	Nakabango	2020B	R4	9	13.1	0.77	0.315055	70.8342	0.218021	37.8052	-8.89485	20.7177	-184.281	0.646457	-2.38204	22.9532	-54.6754	-0.743154	0.394841	0.351714	10.9226	26.8			0
ICGV-SM 95526	Valencia	1	3	Nakabango	2020B	R4	14	26.95	0.74	0.34702	81.6187	0.229774	42.5887	-13.4435	24.2485	-325.985	0.746587	-7.06859	28.0307	-198.138	-0.552978	0.486961	0.431045	11.4827	32.2			0
ICGV-SM 95355	Virginia	1	3	Nakabango	2020B	R4	9	12	0.79	0.353791	30.5595	0.145918	39.3042	0.736159	15.05	11.0792	0.0344578	8.31122	16.2995	135.469	-2.62683	0.2174	0.195002	10.3028	28.5			0
Serenut 6T	Spanish	1	3	Nakabango	2020B	R4	13	16.1	0.66	0.29555	48.0555	0.198349	34.1637	-3.17412	17.1418	-54.4102	0.391643	3.59223	17.9929	64.6346	-1.33664	0.253864	0.221311	12.8229	31.1			0
ICGV-SM 16520	Spanish	1	3	Nakabango	2020B	R4	18	18.8	0.79	0.309006	83.3264	0.31252	39.9355	-16.1513	28.0889	-453.67	0.758232	-9.37921	30.8816	-289.645	-0.496897	0.525725	0.468806	10.8269	26.2			0
ICGV 01504	Spanish	1	3	Nakabango	2020B	R4	12	25.45	0.78	0.338893	84.0866	0.232835	41.9054	-14.2033	24.2912	-345.015	0.769895	-8.03807	28.0261	-225.276	-0.512302	0.501954	0.453798	9.59363	24.9			0
SGV 0805	Valencia	1	3	Nakabango	2020B	R4	14	18.3	0.64	0.336239	40.2059	0.178764	38.1864	-1.45423	17.1867	-24.9934	0.24991	6.14556	18.5366	113.918	-1.76851	0.252415	0.216295	14.3098	26.7			0
ICGV-SM 01731	Virginia	1	3	Nakabango	2020B	R4	11	14.25	0.67	0.310283	50.8561	0.221415	36.2874	-4.05277	19.4262	-78.7298	0.412826	3.4129	20.6101	70.3401	-1.26519	0.303307	0.274323	9.55598	26.1			0
ICGV-SM 95714	Valencia	1	3	Nakabango	2020B	R4	13	30	0.74	0.316167	70.208	0.249009	38.434	-9.52853	22.8357	-217.59	0.631127	-2.47869	25.0296	-62.0405	-0.755952	0.40941	0.351761	14.0809	22.8			0
Serenut 11T	Virginia	1	3	Nakabango	2020B	R4	8	17.6	0.83	0.338111	80.2431	0.241618	41.6677	-13.1785	24.485	-322.676	0.733432	-6.64578	27.9457	-185.721	-0.570359	0.478731	0.433028	9.5468	23.4			0
Serenut 8R	Virginia	1	3	Nakabango	2020B	R4	10	23.05	0.85	0.327975	81.3147	0.201855	39.696	-11.6056	21.071	-244.542	0.748628	-5.73822	24.1964	-138.845	-0.564358	0.445771	0.416503	6.56588	23.7			0
ICGV-SM 99568	Spanish	1	4	Nakabango	2020B	R4	11	29.5	0.8	0.323843	64.4186	0.219385	38.5089	-7.49226	20.8196	-155.986	0.579442	-0.504623	22.9617	-11.587	-0.877005	0.350432	0.312012	10.9635	26.3			0
ICGV-SM 88710	Virginia	1	4	Nakabango	2020B	R4	11	18.55	0.8	0.317366	63.7186	0.193784	37.3125	-6.7203	18.7264	-125.847	0.583837	-0.281805	20.7044	-5.8346	-0.883399	0.344439	0.313701	8.92401	25.9			0
SGV 0071	Virginia	1	4	Nakabango	2020B	R4	12	17.8	0.82	0.325127	82.4876	0.212938	39.6806	-12.3462	21.8498	-269.762	0.758394	-6.42595	25.0088	-160.705	-0.542099	0.431891	0.404341	6.37876	24.7			0
SGV 0084	Virginia	1	4	Nakabango	2020B	R4	12	10.5	0.78	0.339725	67.8054	0.198794	40.1781	-8.11958	20.3694	-165.391	0.618508	-1.44317	23.0588	-33.2776	-0.808394	0.389154	0.35281	9.33923	25.1			0
ICGV 01514	Spanish	1	4	Nakabango	2020B	R4	13	27	0.79	0.350412	97.5345	0.157876	42.51	-15.1004	20.1879	-304.844	0.88736	-10.5772	24.6268	-260.484	-0.360446	0.627915	0.584446	6.92273	25.7			0
RedBeauty	Valencia	1	4	Nakabango	2020B	R4	14	29.25	0.62	0.352967	40.0207	0.177649	40.0217	-1.42588	17.7392	-25.2939	0.240603	6.53508	19.3854	126.685	-1.79927	0.263352	0.211262	19.7794	24.6			0
ICGV-SM 03702	Virginia	1	4	Nakabango	2020B	R4	11	13.9	0.84	0.305527	86.1827	0.199987	37.3293	-12.3468	20.2279	-249.751	0.795052	-6.92788	23.0116	-159.422	-0.487524	0.459347	0.433254	5.68046	23.7			0
SGV 0023	Virginia	1	4	Nakabango	2020B	R4	11	18.25	0.86	0.374996	87.0832	0.152919	44.3965	-12.2158	19.7612	-241.398	0.801515	-7.04583	24.0894	-169.73	-0.499252	0.5329	0.50079	6.02554	24			0
SGV 990400	Virginia	1	4	Nakabango	2020B	R4	11	25.75	0.82	0.335432	87.2475	0.225177	41.6008	-14.9038	23.8515	-355.479	0.800084	-9.07634	27.6908	-251.331	-0.466396	0.527815	0.47474	10.0556	22.6			0
ICGV-SM 16501	Spanish	1	4	Nakabango	2020B	R4	10	21.35	0.65	0.326129	59.6883	0.214988	38.4715	-6.32768	20.3468	-128.748	0.529561	0.857851	22.3296	19.1555	-0.987349	0.325517	0.285601	12.2622	25.1			0
ICGVS-SM 0205	Spanish	1	5	Nakabango	2020B	R4	7	11.05	0.64	0.33212	38.3027	0.18524	37.6897	-0.810088	17.2803	-13.9985	0.189634	7.01752	18.4108	129.198	-1.97109	0.211708	0.166351	21.424	30.8			0
ICGV 9555	Spanish	1	5	Nakabango	2020B	R4	15	27	0.74	0.335048	74.8972	0.230177	40.652	-10.8844	22.9518	-249.817	0.682303	-4.16513	25.9508	-108.089	-0.668007	0.427143	0.376342	11.8932	28			0
SGV 10005	Spanish	1	5	Nakabango	2020B	R4	13	22.25	0.66	0.340107	43.8472	0.162765	38.6156	-2.48114	16.4975	-40.9325	0.348486	4.51134	18.1583	81.9181	-1.47946	0.264496	0.229539	13.2167	27.9			0
ICGV 01515	Spanish	1	5	Nakabango	2020B	R4	12	26.5	0.8	0.343565	81.0249	0.148761	40.3486	-9.67011	17.6666	-170.838	0.753094	-4.46334	20.8624	-93.1162	-0.584944	0.422194	0.398374	5.64201	27.8			0
Serenut 4T	Spanish	1	5	Nakabango	2020B	R4	20	30.15	0.87	0.359142	95.8051	0.312902	48.1191	-25.2415	33.9498	-856.943	0.871936	-19.6039	39.8376	-780.974	-0.31822	0.759236	0.692049	8.84934	26.6			0
ICGV 01510	Spanish	1	5	Nakabango	2020B	R4	15	29.1	0.86	0.330158	92.7717	0.21318	41.2105	-16.2491	23.3075	-378.725	0.850618	-10.9505	27.3523	-299.52	-0.391877	0.536727	0.496514	7.49226	29.5			0
Serenut 9T	Virginia	1	5	Nakabango	2020B	R4	6	16.15	0.87	0.322435	58.9838	0.196679	37.7393	-5.88334	18.8894	-111.133	0.534156	0.883472	20.7944	18.3712	-0.988855	0.337897	0.320359	5.19016	28.1			0
ICGV-SM 96714	Valencia	1	5	Nakabango	2020B	R4	14	14.05	0.61	0.345449	24.2333	0.136068	37.991	2.27852	13.7308	31.2859	-0.205347	9.7373	14.5387	141.567	-4.01216	0.207154	0.170489	17.6998	34.8			0
SGV 0065	Virginia	1	5	Nakabango	2020B	R4	2	13.5	0.86	0.317609	65.7069	0.193119	37.4185	-7.12581	18.8029	-133.986	0.603506	-0.777005	20.8675	-16.2142	-0.843052	0.365286	0.334643	8.38861	27.4			0
SGV 0047	Virginia	1	5	Nakabango	2020B	R4	7	17.6	0.84	0.325996	73.6759	0.201157	38.9542	-9.38686	20.2878	-190.438	0.677229	-3.1497	22.9358	-72.241	-0.693586	0.423454	0.390402	7.80545	27.4			0
ICGV-SM 03702	Virginia	2	1	Nakabango	2020B	R4	12	11	0.78	0.332937	73.5689	0.163152	39.0434	-8.30666	17.8333	-148.135	0.685827	-2.63626	20.5291	-54.1199	-0.699052	0.357151	0.334874	6.23756	28.9			0
Serenut 4T	Spanish	2	1	Nakabango	2020B	R4	21	25.85	0.82	0.321838	92.9772	0.287053	42.1694	-20.143	28.6205	-576.504	0.84974	-14.3225	32.7396	-468.914	-0.362388	0.599524	0.559076	6.74673	27.2			0
ICGV-SM 99568	Spanish	2	1	Nakabango	2020B	R4	15	27.1	0.85	0.34295	64.0929	0.19501	40.2986	-7.25413	20.0111	-145.163	0.584049	-0.426068	22.6044	-9.63102	-0.881312	0.371027	0.317596	14.4009	26.8			0
ICGV SM 03590	Spanish	2	1	Nakabango	2020B	R4	6	12.75	0.7	0.348195	17.4738	0.145868	37.9365	5.10967	13.8701	70.8715	-0.842109	13.7073	14.1441	193.877	-18.689	0.149136	0.129053	13.4658	30.7			0
12CS-015	Spanish	2	1	Nakabango	2020B	R4	10	10.1	0.56	0.350154	13.5646	0.117641	37.8326	4.83452	12.011	58.0675	-0.937939	12.4477	12.3518	153.752	-26.3249	0.10253	0.0756285	26.238	32.5			0
ICGV-SM 16502	Spanish	2	1	Nakabango	2020B	R4	13	28.25	0.76	0.32262	69.1774	0.21322	38.5196	-8.50089	20.656	-175.595	0.630097	-1.87858	23.0018	-43.2107	-0.777548	0.379909	0.345604	9.02986	29.1			0
SGV 0805	Valencia	2	1	Nakabango	2020B	R4	14	23.1	0.84	0.33005	56.8889	0.186225	38.3696	-5.37815	18.4094	-99.0087	0.514624	1.39339	20.4044	28.4313	-1.03932	0.329131	0.306935	6.74385	30			0
Serenut 9T	Virginia	2	1	Nakabango	2020B	R4	10	20.1	0.86	0.32152	84.6244	0.194832	39.012	-12.1201	20.505	-248.522	0.780376	-6.57994	23.6218	-155.43	-0.514134	0.47298	0.445794	5.74771	31.8			0
ICGV-SM 08556	Spanish	2	1	Nakabango	2020B	R4	9	26.75	0.75	0.337834	39.493	0.167117	38.2026	-1.35904	16.4248	-22.3219	0.251178	5.96559	17.8131	106.266	-1.773	0.25519	0.216741	15.0668	28.7			0
Serenut 11T	Virginia	2	1	Nakabango	2020B	R4	10	22.5	0.85	0.321793	90.8237	0.247928	40.8738	-16.9995	25.279	-429.731	0.831798	-11.28	29.0725	-327.939	-0.40608	0.553776	0.514599	7.07442	28.4			0
ICGV 01502	Spanish	2	2	Nakabango	2020B	R4	19	29.15	0.69	0.335678	79.0323	0.163529	39.6499	-9.66616	18.3483	-177.357	0.735232	-4.20259	21.3683	-89.8023	-0.608399	0.39674	0.358411	9.66077	31.3			0
SGV 990400	Virginia	2	2	Nakabango	2020B	R4	13	23	0.86	0.334788	97.2525	0.194483	41.7106	-16.9996	22.5967	-384.134	0.886759	-12.1433	26.9819	-327.649	-0.344884	0.537449	0.512259	4.68696	27.4			0
SGV 0071	Virginia	2	2	Nakabango	2020B	R4	12	15.35	0.74	0.328889	60.8788	0.164742	38.0726	-5.80823	17.0886	-99.2545	0.569802	0.316427	19.2067	6.07753	-0.931266	0.331675	0.31048	6.39035	26.9			0
ICGV 01510	Spanish	2	2	Nakabango	2020B	R4	14	25.5	0.78	0.344031	50.8315	0.140207	39.0591	-3.92514	15.4949	-60.8198	0.482382	2.19648	17.5356	38.5166	-1.14646	0.29368	0.27017	8.00528	27			0
ICGV-SM 95355	Virginia	2	2	Nakabango	2020B	R4	4	10.25	0.34	0.35421	0.879435	0.0797951	37.5959	6.03569	9.1599	55.2864	-2.44202	12.6952	9.19995	116.795	8.37405	0.0892715	0.0789671	11.5428	30.4			0
DOK 1R	Spanish	2	2	Nakabango	2020B	R4	11	23.5	0.83	0.324379	85.9764	0.228353	40.2283	-14.2174	23.3308	-331.703	0.789526	-8.34063	26.7599	-223.195	-0.482522	0.502409	0.444472	11.5319	26.1			0
ICGVS-SM 0205	Spanish	2	2	Nakabango	2020B	R4	5	17.6	0.71	0.333983	40.9186	0.156783	37.7338	-1.8157	15.7125	-28.5292	0.303935	5.03177	17.1435	86.262	-1.61499	0.246276	0.221997	9.8586	29			0
Serenut 8R	Virginia	2	2	Nakabango	2020B	R4	6	17.3	0.87	0.337377	56.3098	0.139436	38.5036	-4.82127	15.4504	-74.4905	0.547327	0.977928	17.5594	17.1718	-0.997489	0.320013	0.295193	7.7559	27.6			0
SGV 10010 ER	Spanish	2	2	Nakabango	2020B	R4	10	18.55	0.77	0.32389	78.1918	0.155579	38.078	-8.87582	17.1963	-152.632	0.729592	-3.6071	19.8444	-71.5809	-0.623165	0.40697	0.372611	8.44256	28.1			0
SGV 0060	Virginia	2	2	Nakabango	2020B	R4	2	19.15	0.84	0.335397	68.2272	0.188367	39.5214	-7.91886	19.4464	-153.994	0.628857	-1.52923	22.0442	-33.7105	-0.794149	0.373446	0.342496	8.28773	26.9			0
DOK 1T	Spanish	2	3	Nakabango	2020B	R4
ICGV-SM 88710	Virginia	2	3	Nakabango	2020B	R4	11	17.1	0.83	0.327396	75.1954	0.155313	38.3374	-8.31184	17.1402	-142.467	0.704054	-2.90501	19.7448	-57.3588	-0.669763	0.398074	0.36723	7.74815	26.7			0
SGV 0065	Virginia	2	3	Nakabango	2020B	R4	12	14.55	0.82	0.340688	71.0709	0.160163	39.7573	-7.84856	17.7707	-139.475	0.664823	-2.05707	20.5284	-42.2283	-0.740767	0.382355	0.347366	9.15106	29.9			0
RedBeauty	Valencia	2	3	Nakabango	2020B	R4
ICGV 9555	Spanish	2	3	Nakabango	2020B	R4	18	23.55	0.74	0.307855	53.9668	0.177383	35.5869	-4.48773	16.7211	-75.0396	0.494195	1.80848	18.1483	32.8208	-1.09325	0.294148	0.252212	14.2569	26.3			0
ICGV-SM 95526	Valencia	2	3	Nakabango	2020B	R4	16	19	0.45	0.353791	38.473	0.129837	39.5317	-1.56376	14.4697	-22.6271	0.301027	4.94615	16.1839	80.0483	-1.64491	0.2583	0.212705	17.6521	30			0
ICGV 01504	Spanish	2	3	Nakabango	2020B	R4	18	26.65	0.7	0.326114	76.1373	0.182694	38.7589	-9.40864	19.1381	-180.063	0.704554	-3.58559	21.8636	-78.3938	-0.653253	0.406065	0.355396	12.478	24.5			0
SGV 0080	Virginia	2	3	Nakabango	2020B	R4	6	14.5	0.81	0.331409	70.0499	0.176118	38.9331	-7.90413	18.5022	-146.244	0.649786	-1.867	21.055	-39.3096	-0.760304	0.354134	0.323699	8.59422	27.9			0
ICGV-SM 01709	Virginia	2	3	Nakabango	2020B	R4	14	20.25	0.82	0.315098	92.1296	0.214268	39.3405	-15.4617	22.4669	-347.376	0.845739	-10.1584	25.9992	-264.111	-0.399401	0.53803	0.50199	6.69852	23.9			0
SGV 0075	Virginia	2	3	Nakabango	2020B	R4	10	27.75	0.86	0.341467	38.0444	0.145338	38.3159	-1.25949	15.0608	-18.9689	0.260907	5.54044	16.5186	91.5202	-1.75812	0.261004	0.230064	11.8542	26.9			0
Serenut 5R	Virginia	2	4	Nakabango	2020B	R4	17	20.85	0.85	0.334985	100.534	0.219335	42.8879	-20.1951	25.2367	-509.658	0.912956	-15.3945	30.158	-464.266	-0.295655	0.618768	0.57951	6.34451	23.3			0
SGV 0084	Virginia	2	4	Nakabango	2020B	R4	12	17.25	0.75	0.344295	69.3758	0.16241	40.1277	-7.6011	17.9875	-136.725	0.646976	-1.64578	20.7596	-34.1657	-0.773917	0.343467	0.319552	6.963	25			0
ICGV-SM 96714	Valencia	2	4	Nakabango	2020B	R4	18	16.05	0.6	0.331371	40.7083	0.151595	37.3795	-1.76697	15.2671	-26.9764	0.306861	4.89321	16.6529	81.4862	-1.61023	0.260935	0.210927	19.1652	26.1			0
ICGV 01515	Spanish	2	4	Nakabango	2020B	R4	15	26.2	0.73	0.340013	84.8498	0.195194	41.2299	-12.7694	21.4936	-274.462	0.780955	-7.10587	25.1392	-178.636	-0.512357	0.461781	0.420751	8.88532	26.6			0
Acholi White	Valencia	2	4	Nakabango	2020B	R4	9	10.05	0.47	0.353163	11.4937	0.0867702	38.0237	3.3518	10.2393	34.3202	-0.596335	9.58808	10.8411	103.945	-8.62357	0.116189	0.0951601	18.0986	28.3			0
ICGV 01514	Spanish	2	4	Nakabango	2020B	R4	14	26.05	0.81	0.310727	94.7335	0.220849	39.2366	-16.6614	23.0606	-384.222	0.867415	-11.4629	26.6856	-305.894	-0.3633	0.58091	0.522241	10.0996	26.4			0
Serenut 14R	Virginia	2	4	Nakabango	2020B	R4	12	18.6	0.85	0.350457	78.1258	0.140062	40.8001	-8.82069	17.0402	-150.306	0.731226	-3.5997	20.1945	-72.6941	-0.628969	0.409073	0.390962	4.42732	24.7			0
ICGV-SM 95714	Valencia	2	4	Nakabango	2020B	R4	8	23.95	0.84	0.321164	74.8457	0.206527	38.5623	-9.78084	20.5335	-200.835	0.688556	-3.57701	23.1313	-82.7409	-0.669629	0.379612	0.352524	7.13561	25.4			0
ICGV-SM 01731	Virginia	2	4	Nakabango	2020B	R4	8	12.3	0.81	0.33603	32.7705	0.157238	37.5683	0.333427	15.3037	5.10265	0.0834769	7.73993	16.3403	126.473	-2.4041	0.22949	0.205011	10.6667	28			0
B7-30-9-3	Spanish	2	4	Nakabango	2020B	R4	14	10	0.63	0.330167	26.2413	0.151926	36.5359	2.11278	14.327	30.2699	-0.168422	9.6457	14.9248	143.96	-3.75379	0.183816	0.150825	17.9481	30			0
JL 24	Spanish	2	5	Nakabango	2020B	R4	5	7.6	0.61	0.337801	14.9762	0.0996476	36.5647	3.1031	10.8091	33.5417	-0.483141	9.40485	11.3111	106.38	-6.78394	0.125011	0.100536	19.5784	33.5			0
SGV 0047	Virginia	2	5	Nakabango	2020B	R4	9	14.7	0.83	0.316521	56.4441	0.165832	36.5186	-4.89405	16.4573	-80.5429	0.527399	1.21705	18.1632	22.1055	-1.02419	0.298633	0.275634	7.70132	26.8			0
Serenut 6T	Spanish	2	5	Nakabango	2020B	R4	19	15.75	0.59	0.331397	53.0271	0.158679	37.9801	-4.35587	16.3994	-71.4337	0.492374	1.95072	18.288	35.6748	-1.10967	0.284964	0.250864	11.9666	27.6			0
SGV 0023	Virginia	2	5	Nakabango	2020B	R4	13	18.25	0.84	0.354628	96.1022	0.153202	42.7364	-14.3917	19.7861	-284.755	0.875081	-9.82129	24.1705	-237.385	-0.381495	0.556597	0.531071	4.58604	25.4			0
ICGV-SM 16501	Spanish	2	5	Nakabango	2020B	R4	13	19.75	0.59	0.308939	56.814	0.17656	35.8067	-5.00748	16.8513	-84.3825	0.525617	1.1946	18.4014	21.9823	-1.02138	0.279246	0.246767	11.6309	26.8			0
ICGV-SM 16520	Spanish	2	5	Nakabango	2020B	R4	15	25.6	0.78	0.331166	82.5011	0.261068	41.4616	-14.5613	25.7891	-375.522	0.752655	-8.0265	29.2345	-234.651	-0.528162	0.48746	0.420768	13.6814	27.1			0
SGV 10005	Spanish	2	5	Nakabango	2020B	R4	13	20.55	0.76	0.346541	60.1852	0.156847	39.9254	-5.8063	17.1954	-99.8414	0.567152	0.411	19.652	8.077	-0.941801	0.323662	0.294507	9.00803	29.2			0
Serenut 7T	Virginia	2	5	Nakabango	2020B	R4	9	17.35	0.89	0.310409	73.4885	0.183184	36.7935	-8.46338	18.2748	-154.667	0.682335	-2.69412	20.4921	-55.2081	-0.694527	0.34136	0.322869	5.41694	25.3			0
ICGV 02501	Spanish	2	5	Nakabango	2020B	R4	16	24.35	0.75	0.340465	64.2198	0.163066	39.4905	-6.55723	17.6033	-115.429	0.600722	-0.432648	20.091	-8.69233	-0.866877	0.35165	0.31698	9.85931	24			0
SGV 07010	Virginia	2	5	Nakabango	2020B	R4	9	9.25	0.78	0.309216	60.3542	0.149213	35.5809	-5.24166	15.243	-79.8986	0.581034	0.275958	16.9241	4.67033	-0.917947	0.328221	0.301948	8.00448	22.9			0
Acholi White	Valencia	3	1	Nakabango	2020B	R4	15	22.3	0.65	0.320438	59.18	0.187923	37.385	-5.73726	18.2189	-104.527	0.539927	0.813912	20.0908	16.3521	-0.981645	0.308956	0.260868	15.5647	25.9			0
ICGV-SM 95714	Valencia	3	1	Nakabango	2020B	R4	12	15.25	0.84	0.308931	81.3967	0.217643	37.7612	-11.7376	21.2267	-249.152	0.750058	-5.84158	23.8793	-139.493	-0.554598	0.418198	0.37317	10.7672	27			0
Serenut 5R	Virginia	3	1	Nakabango	2020B	R4	15	16.45	0.87	0.32024	84.6984	0.191886	38.8013	-11.9681	20.2302	-242.116	0.78125	-6.47683	23.3014	-150.919	-0.514148	0.432902	0.400385	7.51142	24.5			0
SGV 07010	Virginia	3	1	Nakabango	2020B	R4	11	30.05	0.82	0.332239	91.1124	0.17904	40.4086	-13.7067	20.4482	-280.278	0.836681	-8.64343	24.1686	-208.899	-0.429585	0.469919	0.437031	6.99848	24			0
ICGV 01510	Spanish	3	1	Nakabango	2020B	R4	17	19.6	0.81	0.344938	94.9674	0.22245	43.5041	-18.327	25.2103	-462.029	0.867901	-13.0769	29.9759	-391.99	-0.360909	0.601617	0.54323	9.70509	28.1			0
SGV 0047	Virginia	3	1	Nakabango	2020B	R4	10	19.5	0.73	0.340854	74.4814	0.194728	40.6124	-9.73665	20.607	-200.644	0.685092	-3.4749	23.6598	-82.2156	-0.681895	0.408284	0.347091	14.9879	25.9			0
RedBeauty	Valencia	3	1	Nakabango	2020B	R4	12	22.8	0.62	0.325904	64.7297	0.168197	37.931	-6.53534	17.396	-113.689	0.604488	-0.517933	19.5924	-10.1475	-0.856191	0.335549	0.285661	14.8675	25.5			0
SGV 0075	Virginia	3	1	Nakabango	2020B	R4	5	23.05	0.82	0.321517	28.4777	0.152345	35.7	1.42478	14.1959	20.226	-0.0616917	8.58733	14.7923	127.026	-3.10614	0.200147	0.176969	11.5805	28.1			0
ICGV SM 03590	Spanish	3	1	Nakabango	2020B	R4	10	18.7	0.81	0.31616	77.2148	0.224409	38.4608	-10.9058	21.7385	-237.075	0.707744	-4.61605	24.3518	-112.409	-0.625195	0.402548	0.37399	7.09427	26.3			0
SGV 0071	Virginia	3	1	Nakabango	2020B	R4	4	15.35	0.81	0.318958	33.1719	0.156027	35.6881	0.153598	14.6419	2.24897	0.109295	7.07694	15.4363	109.242	-2.29858	0.213349	0.182832	14.3041	31.7			0
ICGV-SM 08556	Spanish	3	2	Nakabango	2020B	R4	14	27.75	0.58	0.307176	70.8098	0.248203	37.3795	-9.43718	22.2991	-210.441	0.637652	-2.56136	24.2812	-62.1931	-0.744179	0.361161	0.307674	14.8098	26.3			0
ICGV 01514	Spanish	3	2	Nakabango	2020B	R4	13	19.65	0.78	0.29955	67.6747	0.162779	34.9282	-6.55307	16.0881	-105.426	0.638977	-1.0844	17.7999	-19.3023	-0.790347	0.327632	0.283704	13.4077	26.1			0
SGV 0023	Virginia	3	2	Nakabango	2020B	R4	12	16.95	0.85	0.314724	92.6053	0.220528	39.5008	-15.9738	22.9887	-367.216	0.849485	-10.6412	26.578	-282.822	-0.390818	0.513736	0.477641	7.02594	25.1			0
ICGV-SM 96714	Valencia	3	2	Nakabango	2020B	R4	16	28.6	0.7	0.300158	72.2704	0.196406	35.7475	-8.30523	18.5931	-154.42	0.667081	-2.3917	20.5109	-49.0559	-0.716206	0.358189	0.305172	14.8013	24.3			0
ICGV 9555	Spanish	3	2	Nakabango	2020B	R4	15	30.25	0.81	0.333646	90.6899	0.230564	41.8723	-16.5185	24.621	-406.703	0.831454	-10.9022	28.7108	-313.01	-0.413874	0.505203	0.46013	8.92169	26			0
ICGV-SM 99568	Spanish	3	2	Nakabango	2020B	R4	16	27.6	0.78	0.325868	78.7129	0.182039	38.8646	-10.0377	19.2629	-193.356	0.728546	-4.34976	22.11	-96.1732	-0.610356	0.39859	0.352827	11.4813	30.6			0
ICGV-SM 16502	Spanish	3	2	Nakabango	2020B	R4	6	19.1	0.71	0.334357	25.7427	0.111933	36.7308	0.907102	12.0652	10.9444	0.0152817	7.04479	12.9759	91.4122	-2.74426	0.206993	0.180386	12.854	33.1			0
DOK 1T	Spanish	3	2	Nakabango	2020B	R4	7	30.85	0.84	0.297257	70.7829	0.195457	35.317	-7.89314	18.2942	-144.398	0.654213	-1.98027	20.0789	-39.7615	-0.741511	0.371655	0.318819	14.2164	27.3			0
ICGV-SM 16501	Spanish	3	2	Nakabango	2020B	R4	9	6.1	0.36	0.343349	12.3895	0.105061	37.0317	4.29906	11.0562	47.5315	-0.850582	11.1838	11.3984	127.478	-17.7683	0.11286	0.0882146	21.8373	32.4			0
ICGV-SM 16520	Spanish	3	2	Nakabango	2020B	R4	15	20.65	0.73	0.319093	56.4118	0.193341	37.1893	-5.24784	18.3624	-96.3631	0.507742	1.49961	20.0911	30.1287	-1.051	0.306796	0.268192	12.583	26			0
B7-30-9-3	Spanish	3	3	Nakabango	2020B	R4	14	21.7	0.72	0.330866	61.9682	0.252615	39.7216	-7.52979	23.2924	-175.387	0.53609	0.349515	25.3921	8.87491	-0.950044	0.3273	0.267016	18.4185	28			0
SGV 0060	Virginia	3	3	Nakabango	2020B	R4	15	21.05	0.87																26.4			0
JL 24	Spanish	3	3	Nakabango	2020B	R4	6	14.85	0.72	0.334837	20.7412	0.121792	36.5934	2.61717	12.3289	32.2668	-0.301945	9.44914	12.9132	122.018	-4.78543	0.156699	0.123955	20.8965	28.5			0
Serenut 9T	Virginia	3	3	Nakabango	2020B	R4	9	17.75	0.82	0.311195	91.43	0.198527	38.4072	-14.1809	20.9496	-297.084	0.840338	-9.01043	24.2226	-218.256	-0.41516	0.486234	0.437147	10.0953	26.8			0
12CS-015	Spanish	3	3	Nakabango	2020B	R4	10	22.15	0.78	0.311956	77.5898	0.275718	38.9752	-12.6166	25.0839	-316.474	0.703693	-5.74431	27.5816	-158.437	-0.607042	0.44324	0.378592	14.5855	25.5			0
ICGV-SM 88710	Virginia	3	3	Nakabango	2020B	R4	9	16.6	0.78	0.322628	62.2321	0.184459	37.7118	-6.34011	18.2485	-115.698	0.573701	0.0490261	20.2931	0.994893	-0.910472	0.316055	0.284742	9.90773	27.6			0
Serenut 14R	Virginia	3	3	Nakabango	2020B	R4	6	16.45	0.87	0.332142	34.5864	0.145414	37.1275	-0.388627	14.5438	-5.65209	0.174315	6.41543	15.6764	100.571	-2.05554	0.212052	0.197061	7.06956	25.5			0
Serenut 4T	Spanish	3	3	Nakabango	2020B	R4	11	24.65	0.8	0.319422	51.4912	0.168855	36.6965	-4.03946	16.5128	-66.7029	0.46765	2.35841	18.0979	42.6824	-1.1623	0.282041	0.23947	15.0939	28.3			0
SGV 990400	Virginia	3	3	Nakabango	2020B	R4	12	22.65	0.73																28.5			0
SGV 0080	Virginia	3	3	Nakabango	2020B	R4	8	15	0.7	0.321323	47.0804	0.154806	36.5589	-3.11479	15.4456	-48.1098	0.420727	3.143	16.9187	53.1756	-1.29007	0.265449	0.23816	10.2801	29.7			0
SGV 0084	Virginia	3	4	Nakabango	2020B	R4	14	13.8	0.83	0.322098	81.3497	0.1748	38.434	-10.3597	18.7506	-194.251	0.75454	-4.94072	21.6069	-106.754	-0.568695	0.36704	0.347315	5.37406	33.1			0
SGV 10005	Spanish	3	4	Nakabango	2020B	R4	16	23.7	0.78	0.341129	65.0541	0.1667	39.6601	-6.81947	17.9359	-122.313	0.607212	-0.646559	20.4821	-13.2429	-0.851183	0.342978	0.284085	17.1709	30.3			0
ICGV 02501	Spanish	3	4	Nakabango	2020B	R4	15	21.5	0.68	0.323386	76.8436	0.153238	37.9092	-8.50271	16.9052	-143.74	0.719685	-3.23779	19.4753	-63.057	-0.642578	0.393977	0.355231	9.83472	29.4			0
SGV 0065	Virginia	3	4	Nakabango	2020B	R4	11	16.8	0.81	0.314419	91.4264	0.179904	38.3374	-13.2531	19.6821	-260.849	0.840018	-8.26752	22.9246	-189.529	-0.424236	0.441102	0.41725	5.40737	30.2			0
Serenut 6T	Spanish	3	4	Nakabango	2020B	R4	16	25.95	0.81	0.321249	86.6237	0.206298	39.3975	-13.3057	21.5694	-286.997	0.797528	-7.73607	24.8609	-192.326	-0.479948	0.470332	0.415635	11.6294	28.2			0
SGV 10010 ER	Spanish	3	4	Nakabango	2020B	R4	10	23	0.82	0.312344	79.4883	0.130176	36.3106	-7.92901	14.9311	-118.389	0.748446	-3.24493	17.2215	-55.8825	-0.604505	0.37275	0.339333	8.96513	30.2			0
ICGV 01515	Spanish	3	4	Nakabango	2020B	R4	16	27.25	0.75																29			0
DOK 1R	Spanish	3	4	Nakabango	2020B	R4	11	25.85	0.73	0.343752	82.7247	0.203572	41.6963	-12.5927	22.1342	-278.729	0.76092	-6.66354	25.7924	-171.868	-0.541872	0.450405	0.395468	12.1973	29.6			0
ICGV-SM 03702	Virginia	3	4	Nakabango	2020B	R4	8	15.55	0.66	0.320379	75.5665	0.192431	38.2458	-9.49794	19.5391	-185.581	0.699	-3.56097	22.1266	-78.792	-0.658195	0.397573	0.36378	8.49976	27.4			0
SGV 0805	Valencia	3	4	Nakabango	2020B	R4	17	25.8	0.69	0.321382	82.5774	0.210049	39.1793	-12.1654	21.4472	-260.914	0.760731	-6.3242	24.501	-154.949	-0.539723	0.447162	0.401068	10.3081	29.5			0
Serenut 8R	Virginia	3	5	Nakabango	2020B	R4	15	15.75	0.83	0.331081	93.2854	0.218333	41.5097	-16.7506	23.8377	-399.297	0.853635	-11.4283	27.979	-319.753	-0.384847	0.513064	0.475541	7.31351	26.4			0
ICGV 01502	Spanish	3	5	Nakabango	2020B	R4	10	28.05	0.74	0.328732	67.2796	0.184376	38.6369	-7.45546	18.7843	-140.046	0.620818	-1.18417	21.1716	-25.0708	-0.812966	0.33293	0.29274	12.0716	28.6			0
Serenut 7T	Virginia	3	5	Nakabango	2020B	R4	13	20.45	0.83	0.317201	94.9833	0.244364	40.7015	-18.452	25.3215	-467.231	0.868906	-13.0797	29.3101	-383.368	-0.351012	0.578789	0.529365	8.53914	26.8			0
Serenut 11T	Virginia	3	5	Nakabango	2020B	R4	11	19.15	0.77																28.3			0
ICGV-SM 01709	Virginia	3	5	Nakabango	2020B	R4	13	18.55	0.89	0.323226	92.6136	0.213923	40.3686	-15.9267	22.9472	-365.473	0.84901	-10.6275	26.7641	-284.437	-0.394268	0.536476	0.494152	7.8893	24.5			0
ICGVS-SM 0205	Spanish	3	5	Nakabango	2020B	R4	15	30.1	0.78	0.31156	88.3403	0.291568	40.3736	-17.6382	27.4949	-484.96	0.808018	-11.4292	30.8268	-352.325	-0.425319	0.587329	0.513789	12.5211	24.3			0
ICGV-SM 95526	Valencia	3	5	Nakabango	2020B	R4	10	30.25	0.79	0.333266	76.9584	0.189643	39.7778	-10.0495	20.0566	-201.56	0.71044	-4.08323	23.032	-94.045	-0.638401	0.400804	0.360041	10.1705	24.8			0
ICGV-SM 01731	Virginia	3	5	Nakabango	2020B	R4	13	19.9	0.71	0.323031	88.6249	0.178373	39.1115	-12.5992	19.7028	-248.241	0.816721	-7.46117	23.0079	-171.666	-0.462255	0.476954	0.42648	10.5826	25.1			0
ICGV-SM 95355	Virginia	3	5	Nakabango	2020B	R4	6	13.05	0.59	0.33384	52.9788	0.157269	38.235	-4.38633	16.3984	-71.9289	0.494504	1.91975	18.3386	35.2056	-1.1056	0.307675	0.264967	13.881	24.8			0
ICGV 01504	Spanish	3	5	Nakabango	2020B	R4	15	29.3	0.75	0.342978	80.801	0.207764	41.5529	-12.1341	22.2285	-269.724	0.742824	-6.03493	25.7608	-155.465	-0.570985	0.466575	0.408677	12.4091	23.9			0
SGV 10010 ER	Spanish	1	1	NaSARRI	2020B	R7	12	17.2	0.58	0.365161	54.602	0.271101	43.5355	-6.07037	25.95	-157.526	0.428243	3.47507	28.363	98.5634	-1.19121	0.372493	0.186006	50.0645	33.3	5	0	0
Serenut 14R	Virginia	1	1	NaSARRI	2020B	R7	8	23.15	0.75	0.391365	61.8603	0.264719	46.9229	-8.74942	27.5222	-240.804	0.523154	0.49815	31.1067	15.4958	-0.968246	0.474885	0.299389	36.9554	29	4	0	0
DOK 1T	Spanish	1	1	NaSARRI	2020B	R7	6	26.85	0.52	0.372719	51.4218	0.266944	44.1122	-5.00148	25.7995	-129.036	0.37744	4.95543	28.1788	139.638	-1.32658	0.342016	0.150173	56.0917	31.1	5	0	0
ICGV SM 03590	Spanish	1	1	NaSARRI	2020B	R7
ICGV 02501	Spanish	1	1	NaSARRI	2020B	R7	9	34.15	0.53	0.381255	52.4761	0.264578	45.1234	-5.48067	26.1704	-143.431	0.396965	4.48972	28.8475	129.517	-1.27524	0.339914	0.160685	52.7277	31.3	5	0	0
SGV 0080	Virginia	1	1	NaSARRI	2020B	R7	1	24.55	0.64	0.378231	56.8813	0.267565	45.1319	-6.95825	26.6023	-185.105	0.46054	2.57299	29.5062	75.9193	-1.11263	0.426639	0.267404	37.3232	30.6	3	0	0
JL 24	Spanish	1	1	NaSARRI	2020B	R7	6	24.55	0.54	0.368022	49.7036	0.280635	43.6517	-4.34288	26.3585	-114.472	0.337076	6.04259	28.4027	171.626	-1.43173	0.32353	0.14951	53.788	32.5	6	1	16.6667
Acholi White	Valencia	1	1	NaSARRI	2020B	R7	12	29.4	0.52	0.395687	47.7786	0.293154	46.8184	-3.72795	28.6672	-106.87	0.283151	8.02322	31.0625	249.222	-1.58431	0.285909	0.0794135	72.2242	30.9	6	1	8.33333
ICGV-SM 16502	Spanish	1	1	NaSARRI	2020B	R7	10	35.4	0.47	0.412422	39.5257	0.19833	46.7257	-1.10035	21.5825	-23.7484	0.177373	9.06675	24.1931	219.353	-2.00044	0.18914	0.058357	69.1461	30.8	7	0	0
SGV 0060	Virginia	1	1	NaSARRI	2020B	R7	8	26.65	0.63	0.367542	60.26	0.322178	45.0553	-8.67313	30.2244	-262.14	0.484899	1.38978	32.8011	45.5862	-1.02405	0.469658	0.199378	57.5482	28.9	5	1	12.5
SGV 0075	Virginia	1	2	NaSARRI	2020B	R7	11	22.75	0.56	0.407629	43.1161	0.191864	46.3604	-2.39723	21.1922	-50.8027	0.276316	7.02193	24.0062	168.57	-1.66969	0.270468	0.117661	56.497	25.4	4	0	0
ICGV 01502	Spanish	1	2	NaSARRI	2020B	R7	8	41.95	0.39	0.447346	34.1116	0.184362	49.9035	0.770046	21.3919	16.4727	0.0212705	11.9589	24.2043	289.456	-2.65475	0.13797	0.0528537	61.6919	28.3	5	0	0
SGV 07010	Virginia	1	2	NaSARRI	2020B	R7	11	19.9	0.59	0.449086	45.6572	0.233432	51.6344	-3.29883	26.5406	-87.5529	0.278787	8.2546	30.2606	249.789	-1.63067	0.277222	0.139005	49.8578	27.6	4	0	0
Serenut 5R	Virginia	1	2	NaSARRI	2020B	R7	11	23.7	0.63	0.43092	53.0312	0.257831	50.6196	-6.14472	28.3504	-174.205	0.402575	4.72474	32.2419	152.335	-1.26123	0.376207	0.181163	51.8448	26.2	4	0	0
12CS-015	Spanish	1	2	NaSARRI	2020B	R7	1	13.3	0.54	0.480414	33.4846	0.176404	53.2247	0.897074	21.8993	19.6453	0.00935594	12.6306	25.2256	318.615	-2.71101	0.140212	0.0573306	59.1116	29.2	5	0	0
DOK 1R	Spanish	1	2	NaSARRI	2020B	R7	13	30.75	0.42	0.447383	39.2696	0.18087	50.2309	-1.30092	21.5753	-28.0678	0.192738	9.02413	24.8519	224.267	-1.95368	0.200353	0.0758575	62.138	26.7	5	0	0
B7-30-9-3	Spanish	1	2	NaSARRI	2020B	R7	12	25.8	0.4	0.426249	38.2271	0.191741	48.0457	-0.736116	21.5321	-15.8502	0.149226	9.67185	24.3161	235.182	-2.10863	0.174098	0.0580696	66.6455	26.8	5	0	0
ICGV-SM 08556	Spanish	1	2	NaSARRI	2020B	R7	12	34.8	0.47	0.444955	38.7093	0.174002	49.845	-1.20484	20.872	-25.1473	0.191087	8.83346	24.073	212.648	-1.96474	0.177306	0.0626825	64.6472	25.7	6	1	8.33333
Serenut 7T	Virginia	1	2	NaSARRI	2020B	R7	6	24.35	0.59	0.437273	45.796	0.182897	49.6024	-3.46131	21.8784	-75.7282	0.338751	5.98274	25.4649	152.35	-1.48654	0.334486	0.176011	47.3786	26.6	4	0	0
ICGV-SM 01709	Virginia	1	2	NaSARRI	2020B	R7	11	24.8	0.63	0.400811	52.5471	0.282781	47.6288	-5.80185	28.6401	-166.166	0.38383	5.10233	31.6702	161.592	-1.29762	0.357212	0.145731	59.2032	27.1	4	0	0
ICGV-SM 95526	Valencia	1	3	NaSARRI	2020B	R7	13	33.9	0.62	0.421481	50.6019	0.285632	49.8413	-5.19389	29.8404	-154.988	0.343777	6.58746	33.1534	218.397	-1.40539	0.32041	0.0995086	68.9434	27.2	5	0	0
ICGV-SM 95355	Virginia	1	3	NaSARRI	2020B	R7	11	21.7	0.78	0.399644	63.4068	0.281715	48.3002	-9.74074	29.4647	-287.008	0.534293	-0.149722	33.3251	-4.9895	-0.933301	0.499621	0.291325	41.6909	23.6	4	0	0
Serenut 6T	Spanish	1	3	NaSARRI	2020B	R7	13	31.15	0.41	0.436442	36.0734	0.175346	48.7842	-0.212153	20.4385	-4.33609	0.111974	10.0162	23.2736	233.113	-2.26477	0.163729	0.0673552	58.8617	28.2	6	0	0
ICGV-SM 16520	Spanish	1	3	NaSARRI	2020B	R7	11	37.35	0.46	0.436125	44.724	0.21731	49.9182	-2.94432	24.555	-72.2978	0.2768	7.85155	27.9844	219.721	-1.64843	0.216889	0.0789239	63.6109	28	6	0	0
ICGV 01504	Spanish	1	3	NaSARRI	2020B	R7	13	30.3	0.45	0.38914	43.1839	0.130724	43.5758	-2.72851	15.9241	-43.4491	0.379442	4.17541	18.4392	76.9911	-1.41607	0.264351	0.153984	41.7503	31.8	6	0	0
SGV 0805	Valencia	1	3	NaSARRI	2020B	R7	14	26.05	0.63	0.424274	52.8116	0.262227	49.9401	-6.02966	28.336	-170.856	0.397542	4.83791	32.0412	155.012	-1.27216	0.336705	0.123715	63.257	30	4	0	0
ICGV-SM 01731	Virginia	1	3	NaSARRI	2020B	R7	3	26.55	0.68	0.452202	38.9982	0.174237	50.6339	-1.31624	21.1823	-27.8811	0.197139	8.85795	24.5332	217.314	-1.94247	0.242399	0.110412	54.4504	33.9	4	0	0
ICGV-SM 95714	Valencia	1	3	NaSARRI	2020B	R7	9	44.5	0.56	0.402125	54.3361	0.234739	47.1228	-6.11389	25.1649	-153.855	0.440779	3.35943	28.5668	95.9683	-1.18006	0.358518	0.180292	49.7119	28.5	4	0	0
Serenut 11T	Virginia	1	3	NaSARRI	2020B	R7	10	25.05	0.55	0.421559	45.7621	0.155014	47.507	-3.41949	19.0348	-65.0894	0.37686	4.72938	22.293	105.432	-1.40179	0.305911	0.15575	49.0864	31.9	4	0	0
Serenut 8R	Virginia	1	3	NaSARRI	2020B	R7	11	27.7	0.64	0.439186	67.2445	0.169161	50.7089	-8.88429	22.2478	-197.656	0.615228	-1.52077	27.0701	-41.1674	-0.829625	0.45819	0.307193	32.955	29.6	4	0	0
ICGV-SM 99568	Spanish	1	4	NaSARRI	2020B	R7	13	18.55	0.38	0.379796	67.0939	0.165245	44.0727	-7.77961	19.5127	-151.801	0.620636	-1.22562	22.987	-28.1733	-0.823453	0.420893	0.301451	28.3783	28.7	5	1	7.69231
ICGV-SM 88710	Virginia	1	4	NaSARRI	2020B	R7	13	27.8	0.69	0.374648	90.4578	0.128464	43.9183	-11.6088	17.842	-207.124	0.828142	-6.96689	22.0152	-153.378	-0.468557	0.666833	0.524833	21.2948	29.4	5	0	0
SGV 0071	Virginia	1	4	NaSARRI	2020B	R7	7	23.05	0.68	0.398083	78.5998	0.114119	45.5455	-8.62505	16.5671	-142.892	0.734957	-3.53392	20.4559	-72.2896	-0.637139	0.511561	0.412348	19.3943	29.6	4	0	0
SGV 0084	Virginia	1	4	NaSARRI	2020B	R7	11	24.4	0.68	0.41571	74.8316	0.222836	49.812	-12.5742	26.5899	-334.348	0.675939	-5.03285	31.7183	-159.634	-0.680388	0.589092	0.397307	32.5561	31.8	4	0	0
ICGV 01514	Spanish	1	4	NaSARRI	2020B	R7	8	35.2	0.51	0.400766	50.7396	0.260474	47.1307	-4.98492	26.7663	-133.428	0.365477	5.55654	29.7681	165.408	-1.36146	0.321224	0.1348	58.0357	33.4	5	0	0
RedBeauty	Valencia	1	4	NaSARRI	2020B	R7	10	28.75	0.49	0.420887	39.8848	0.196728	47.6445	-1.27313	21.8298	-27.7921	0.188619	8.98965	24.6339	221.45	-1.96005	0.190894	0.0713831	62.6059	33.5	5	1	10
ICGV-SM 03702	Virginia	1	4	NaSARRI	2020B	R7	8	26	0.7	0.368446	64.0894	0.25997	44.3573	-8.98637	26.0746	-234.316	0.553861	-0.455111	29.2411	-13.3079	-0.905193	0.508479	0.305657	39.888	30.9	4	0	0
SGV 0023	Virginia	1	4	NaSARRI	2020B	R7	7	24.5	0.64	0.396639	74.2417	0.127706	45.5035	-8.32847	17.4488	-145.322	0.696746	-2.77254	21.2944	-59.0394	-0.699003	0.454102	0.351664	22.5583	32.2	4	0	0
SGV 990400	Virginia	1	4	NaSARRI	2020B	R7	8	31.85	0.73	0.348881	85.6117	0.189414	42.1929	-12.9894	21.535	-279.727	0.787593	-7.38878	25.4361	-187.942	-0.503988	0.626577	0.483321	22.8633	27.5	4	0	0
ICGV-SM 16501	Spanish	1	4	NaSARRI	2020B	R7	7	29.3	0.56	0.390757	57.2588	0.252319	46.3277	-7.09174	26.1623	-185.536	0.472454	2.30296	29.454	67.8314	-1.09257	0.382636	0.194956	49.0492	28.7	5	0	0
ICGVS-SM 0205	Spanish	1	5	NaSARRI	2020B	R7	2	20.8	0.67	0.395673	86.3984	0.0828341	44.8201	-8.30897	14.0556	-116.787	0.796846	-4.16284	17.6823	-73.6084	-0.548013	0.527721	0.449517	14.8192	28.9	5	1	50
ICGV 9555	Spanish	1	5	NaSARRI	2020B	R7	15	33.65	0.46	0.412417	56.3437	0.0747071	45.6501	-4.52439	12.7009	-57.4638	0.606233	0.334455	15.654	5.23556	-0.918436	0.318605	0.222493	30.1667	28.5	6	0	0
SGV 10005	Spanish	1	5	NaSARRI	2020B	R7	10	30.6	0.54	0.410713	77.2444	0.100326	46.5396	-7.93044	15.6398	-124.03	0.726932	-2.98673	19.5079	-58.2649	-0.660626	0.408952	0.315592	22.8289	29.6	5	0	0
ICGV 01515	Spanish	1	5	NaSARRI	2020B	R7	9	33.05	0.53	0.387466	80.2076	0.0827438	43.7141	-7.22588	13.552	-97.9249	0.755436	-2.93203	16.821	-49.3198	-0.621065	0.45495	0.360404	20.7816	34	5	0	0
Serenut 4T	Spanish	1	5	NaSARRI	2020B	R7	12	42.75	0.53	0.380388	72.7552	0.109019	43.27	-7.13308	15.2674	-108.904	0.69512	-2.08175	18.5264	-38.5673	-0.71476	0.396844	0.27679	30.2522	31.3	7	0	0
ICGV 01510	Spanish	1	5	NaSARRI	2020B	R7	12	33.25	0.35	0.432625	47.8628	0.0611706	47.3807	-3.66074	11.7807	-43.126	0.566951	1.11441	14.6613	16.3387	-1.01573	0.271995	0.200471	26.2962	34	7	0	0
Serenut 9T	Virginia	1	5	NaSARRI	2020B	R7	5	30.75	0.7	0.413559	95.6112	0.0606375	46.4298	-8.42666	12.7712	-107.619	0.849329	-4.89843	16.5088	-80.8672	-0.473525	0.523224	0.447612	14.4512	30.4	4	0	0
ICGV-SM 96714	Valencia	1	5	NaSARRI	2020B	R7	9	21.1	0.44	0.413044	65.4236	0.0674557	45.7627	-5.21486	12.3317	-64.3081	0.67019	-0.771647	15.3886	-11.8746	-0.793517	0.367379	0.269122	26.7454	31.7	6	0	0
SGV 0065	Virginia	1	5	NaSARRI	2020B	R7	5	23.05	0.64	0.40354	92.7334	0.0800125	45.8417	-9.32396	14.3408	-133.713	0.837141	-5.40399	18.2926	-98.8529	-0.481387	0.491769	0.410243	16.5781	29.8	4	0	0
SGV 0047	Virginia	1	5	NaSARRI	2020B	R7	5	23.8	0.72	0.391768	108.431	0.0715665	45.0212	-11.5058	14.1464	-162.765	0.938444	-8.33665	18.3628	-153.084	-0.32586	0.658372	0.574348	12.7624	30.9	4	0	0
ICGV-SM 03702	Virginia	2	1	NaSARRI	2020B	R7	6	19.35	0.7	0.395563	107.285	0.0841841	45.8749	-12.7763	15.5691	-198.916	0.938905	-9.44407	20.2016	-190.786	-0.318398	0.682979	0.593221	13.1422	30.3	4	0	0
Serenut 4T	Spanish	2	1	NaSARRI	2020B	R7	15	28.1	0.5	0.400763	65.0018	0.0914716	44.9059	-5.73309	14.0753	-80.6948	0.647153	-0.699812	17.2551	-12.0754	-0.820647	0.353343	0.227233	35.6906	34	7	0	0
ICGV-SM 99568	Spanish	2	1	NaSARRI	2020B	R7	13	31.05	0.55	0.412511	82.3776	0.0813524	46.4583	-7.84032	14.178	-111.16	0.768111	-3.49526	17.931	-62.6734	-0.599106	0.407392	0.316329	22.3528	31	5	0	0
ICGV SM 03590	Spanish	2	1	NaSARRI	2020B	R7	6	24.55	0.79	0.416546	96.2416	0.101571	48.123	-12.1259	17.1508	-207.968	0.867062	-8.01315	22.0654	-176.814	-0.419977	0.504869	0.451179	10.6343	29	4	0	0
12CS-015	Spanish	2	1	NaSARRI	2020B	R7	2	17.3	0.6	0.398573	85.854	0.060797	44.5355	-6.90462	12.0411	-83.1391	0.792614	-3.17134	15.2427	-48.3399	-0.570276	0.448847	0.379085	15.5424	29.8	6	0	0
ICGV-SM 16502	Spanish	2	1	NaSARRI	2020B	R7	6	33.05	0.54	0.386819	83.933	0.0690395	43.4278	-6.99117	12.4515	-87.0505	0.781813	-3.09661	15.5777	-48.238	-0.583557	0.44009	0.361099	17.9489	33.9	6	1	16.6667
SGV 0805	Valencia	2	1	NaSARRI	2020B	R7	11	31.1	0.63	0.408027	78.689	0.110653	46.5517	-8.65336	16.5698	-143.385	0.736246	-3.57143	20.6102	-73.6079	-0.636924	0.509048	0.368842	27.5428	30.6	4	0	0
Serenut 9T	Virginia	2	1	NaSARRI	2020B	R7	7	24.05	0.67	0.388094	78.95	0.122878	44.6652	-8.93038	17.0208	-152.003	0.736915	-3.75669	20.839	-78.2857	-0.628321	0.505264	0.371248	26.524	30.9	4	1	14.2857
ICGV-SM 08556	Spanish	2	1	NaSARRI	2020B	R7	6	28.5	0.47	0.395051	103.138	0.094298	45.9329	-12.7308	16.291	-207.398	0.914724	-9.09733	20.9563	-190.647	-0.349685	0.592529	0.51053	13.8389	34.1	6	0	0
Serenut 11T	Virginia	2	1	NaSARRI	2020B	R7	9	24.85	0.71	0.414353	81.4927	0.0725478	46.4012	-7.22276	13.3593	-96.4909	0.762	-3.02294	16.9322	-51.1852	-0.616043	0.459038	0.35409	22.8626	31.1	4	0	0
ICGV 01502	Spanish	2	2	NaSARRI	2020B	R7	7	33.65	0.51	0.380664	102.222	0.0875806	44.033	-11.4781	15.0485	-172.727	0.90662	-7.89913	19.1726	-151.447	-0.365971	0.651368	0.548374	15.8119	29.9	6	0	0
SGV 990400	Virginia	2	2	NaSARRI	2020B	R7	7	36.05	0.6	0.379159	80.8799	0.122798	43.7675	-9.17454	16.8311	-154.417	0.753513	-4.15557	20.5496	-85.3954	-0.59887	0.47409	0.363917	23.2388	27.2	4	1	14.2857
SGV 0071	Virginia	2	2	NaSARRI	2020B	R7	7	25.25	0.58	0.36566	93.1903	0.106368	42.4496	-10.5744	15.7241	-166.273	0.847991	-6.4134	19.473	-124.888	-0.448538	0.510717	0.406924	20.3228	25.8	4	0	0
ICGV 01510	Spanish	2	2	NaSARRI	2020B	R7	13	29.65	0.49	0.385054	91.8143	0.107475	44.5701	-10.7734	16.361	-176.263	0.836938	-6.46436	20.4812	-132.398	-0.465793	0.515271	0.42013	18.4643	27.7	6	0	0
ICGV-SM 95355	Virginia	2	2	NaSARRI	2020B	R7	10	16.1	0.65	0.405977	75.6722	0.083348	45.5915	-6.88864	13.9096	-95.8181	0.723787	-2.32877	17.3698	-40.4503	-0.678358	0.427063	0.322332	24.5235	24	5	0	0
DOK 1R	Spanish	2	2	NaSARRI	2020B	R7	5	35.05	0.52	0.407167	95.7404	0.132268	48.0612	-14.2663	19.9208	-284.196	0.867724	-9.77032	25.2795	-246.989	-0.402476	0.585063	0.492009	15.905	27.4	6	0	0
ICGVS-SM 0205	Spanish	2	2	NaSARRI	2020B	R7	4	28.35	0.59	0.389388	100.631	0.10986	45.6751	-13.3433	17.4759	-233.187	0.901551	-9.42332	22.2436	-209.609	-0.361843	0.621294	0.514869	17.1295	28.7	6	1	25
Serenut 8R	Virginia	2	2	NaSARRI	2020B	R7	12	26.3	0.64	0.383147	84.5695	0.0819132	43.3648	-7.74791	13.5338	-104.858	0.785211	-3.62874	16.8498	-61.1437	-0.56899	0.473455	0.378788	19.9951	28.9	4	0	0
SGV 10010 ER	Spanish	2	2	NaSARRI	2020B	R7	8	26.1	0.55	0.400784	100.564	0.094543	46.4094	-12.1945	16.2658	-198.354	0.895748	-8.41819	20.9052	-175.984	-0.378818	0.645342	0.537585	16.6976	29.4	5	1	12.5
SGV 0060	Virginia	2	2	NaSARRI	2020B	R7	7	30.15	0.58	0.372063	96.8711	0.118283	43.7453	-12.5466	17.3437	-217.604	0.877079	-8.37554	21.6539	-181.363	-0.395701	0.584357	0.480873	17.7091	29.1	5	0	0
DOK 1T	Spanish	2	3	NaSARRI	2020B	R7	1	8	0.62	0.381115	100.961	0.0970888	44.3355	-12.0768	15.925	-192.324	0.901792	-8.33663	20.2268	-168.623	-0.368366	0.664933	0.543714	18.2302	29.1	5	0	0
ICGV-SM 88710	Virginia	2	3	NaSARRI	2020B	R7	10	31.9	0.53	0.371221	101.576	0.124019	44.1737	-14.372	18.3158	-263.235	0.912615	-10.3836	23.0135	-238.964	-0.338106	0.624465	0.534588	14.3926	32.3	5	0	0
SGV 0065	Virginia	2	3	NaSARRI	2020B	R7	8	25.3	0.63	0.392144	92.3874	0.105155	45.3183	-10.8909	16.4196	-178.825	0.840036	-6.61018	20.6747	-136.664	-0.461891	0.594662	0.484158	18.5826	33.8	5	0	0
RedBeauty	Valencia	2	3	NaSARRI	2020B	R7	8	16.5	0.49	0.397896	95.4048	0.122901	46.6894	-13.1511	18.6004	-244.616	0.864152	-8.76513	23.5164	-206.125	-0.413181	0.574563	0.469625	18.264	35.1	6	0	0
ICGV 9555	Spanish	2	3	NaSARRI	2020B	R7	9	34	0.52	0.381358	73.5326	0.117472	43.5803	-7.58695	16.04	-121.694	0.697363	-2.36537	19.4393	-45.9811	-0.704852	0.399227	0.29127	27.0416	30.7	6	0	0
ICGV-SM 95526	Valencia	2	3	NaSARRI	2020B	R7	9	26.95	0.44	0.396009	77.9545	0.116484	45.3436	-8.56822	16.6678	-142.814	0.729394	-3.41603	20.5189	-70.0933	-0.645796	0.443683	0.318923	28.1191	31.3	6	0	0
ICGV 01504	Spanish	2	3	NaSARRI	2020B	R7	12	50.3	0.41	0.35701	84.5178	0.14052	41.8818	-10.3962	17.7647	-184.685	0.781607	-5.38209	21.3671	-114.999	-0.540016	0.494872	0.368375	25.5616	33.7	7	0	0
SGV 0080	Virginia	2	3	NaSARRI	2020B	R7	5	22.45	0.74	0.392046	81.0185	0.0898331	44.4096	-7.76875	14.3456	-111.447	0.758728	-3.31731	17.8399	-59.1806	-0.610303	0.468082	0.349355	25.3646	31.6	4	0	0
ICGV-SM 01709	Virginia	2	3	NaSARRI	2020B	R7	8	24.85	0.65	0.386061	99.2206	0.0984582	44.8287	-11.8676	16.0888	-190.935	0.888759	-8.0141	20.4326	-163.749	-0.387769	0.552473	0.47461	14.0936	29.9	4	0	0
SGV 0075	Virginia	2	3	NaSARRI	2020B	R7	10	19.5	0.65	0.372857	103.358	0.0879468	43.2429	-11.5947	14.9415	-173.242	0.914774	-8.06675	18.9688	-153.016	-0.353196	0.640815	0.546947	14.6482	30.4	5	0	0
Serenut 5R	Virginia	2	4	NaSARRI	2020B	R7	11	23.75	0.56	0.353712	100.337	0.107932	41.5577	-12.1319	16.014	-194.281	0.901117	-8.27739	19.8897	-164.634	-0.363844	0.636897	0.531905	16.4848	30.2	5	1	9.09091
SGV 0084	Virginia	2	4	NaSARRI	2020B	R7	8	28.5	0.57	0.383297	100.044	0.111808	45.0169	-13.1873	17.405	-229.525	0.898149	-9.22513	22.0379	-203.303	-0.36614	0.703018	0.575332	18.1626	30.8	5	0	0
ICGV-SM 96714	Valencia	2	4	NaSARRI	2020B	R7	12	21	0.44	0.357686	60.7164	0.325609	43.9845	-8.69657	29.8521	-259.611	0.490361	1.16394	32.1797	37.4552	-1.01024	0.471232	0.201693	57.1988	30.1	6	2	16.6667
ICGV 01515	Spanish	2	4	NaSARRI	2020B	R7	9	36.1	0.53	0.369377	58.1142	0.301468	44.7643	-7.67417	28.6822	-220.112	0.464401	2.2591	31.2798	70.6644	-1.08388	0.440662	0.203229	53.8809	29.3	6	0	0
Acholi White	Valencia	2	4	NaSARRI	2020B	R7	9	25.6	0.37	0.393208	58.7853	0.310357	47.7228	-8.39487	30.8471	-258.958	0.466919	2.17325	34.0476	73.994	-1.07138	0.434035	0.174907	59.7021	34.3	6	1	11.1111
ICGV 01514	Spanish	2	4	NaSARRI	2020B	R7	6	32.8	0.6	0.379069	52.5381	0.285647	45.204	-5.58013	27.6148	-154.094	0.384861	4.86649	30.1131	146.545	-1.29463	0.347934	0.141821	59.239	30.1	6	1	16.6667
Serenut 14R	Virginia	2	4	NaSARRI	2020B	R7	11	29.9	0.72	0.38818	50.4018	0.301828	46.3196	-4.84492	29.1247	-141.107	0.334286	6.53169	31.5286	205.935	-1.42556	0.304703	0.104576	65.6795	31.2	4	1	9.09091
ICGV-SM 95714	Valencia	2	4	NaSARRI	2020B	R7	6	26.85	0.59	0.417552	57.0564	0.275736	49.7496	-7.67875	29.4505	-226.143	0.455227	2.85602	33.2926	95.0843	-1.11808	0.417862	0.203269	51.355	30.8	5	0	0
ICGV-SM 01731	Virginia	2	4	NaSARRI	2020B	R7	4	24.75	0.78	0.378092	64.1458	0.297571	46.1638	-9.9271	29.4577	-292.43	0.541149	-0.529386	32.7559	-17.3405	-0.910785	0.520371	0.28233	45.7445	28.7	4	1	25
B7-30-9-3	Spanish	2	4	NaSARRI	2020B	R7	6	20.35	0.6	0.406188	53.0925	0.278322	48.2079	-6.04091	28.6476	-173.058	0.394576	4.80728	31.8762	153.238	-1.27128	0.355201	0.139748	60.6566	29.2	6	2	33.3333
JL 24	Spanish	2	5	NaSARRI	2020B	R7	8	14.4	0.46	0.382942	53.3924	0.261727	45.3309	-5.78434	26.1411	-151.209	0.412103	4.06675	28.9338	117.667	-1.23712	0.378089	0.207289	45.1746	29.1	7	0	0
SGV 0047	Virginia	2	5	NaSARRI	2020B	R7	10	20.45	0.64	0.407337	53.2333	0.258756	48.0224	-5.97243	27.2072	-162.493	0.407988	4.37245	30.5677	133.656	-1.24802	0.342974	0.15733	54.1277	28.6	5	0	0
Serenut 6T	Spanish	2	5	NaSARRI	2020B	R7	15	30.65	0.57	0.37488	54.1855	0.289503	44.9101	-6.17647	27.7979	-171.693	0.410384	4.06706	30.3021	123.24	-1.22523	0.352205	0.148991	57.6977	28.5	6	0	0
SGV 0023	Virginia	2	5	NaSARRI	2020B	R7	6	32.6	0.66	0.387454	67.0697	0.314266	47.8282	-11.6403	31.6065	-367.908	0.571353	-2.12861	35.3319	-75.2078	-0.837308	0.578743	0.286827	50.4396	27.8	5	1	16.6667
ICGV-SM 16501	Spanish	2	5	NaSARRI	2020B	R7	9	35.45	0.54	0.414043	54.1816	0.284849	49.291	-6.62486	29.7013	-196.767	0.408553	4.42402	33.1771	146.776	-1.23016	0.378917	0.140853	62.8274	31.6	7	0	0
ICGV-SM 16520	Spanish	2	5	NaSARRI	2020B	R7	11	39.3	0.56	0.410258	57.6502	0.260761	48.7047	-7.59382	27.9039	-211.897	0.470923	2.36087	31.6661	74.7595	-1.08981	0.439679	0.235628	46.4091	32.8	7	0	0
SGV 10005	Spanish	2	5	NaSARRI	2020B	R7	6	36.1	0.54	0.411503	50.281	0.270634	48.4534	-4.93061	28.0798	-138.451	0.348753	6.21761	31.229	194.169	-1.40118	0.303617	0.107539	64.5807	35	6	0	0
Serenut 7T	Virginia	2	5	NaSARRI	2020B	R7	8	26.75	0.73	0.37822	61.0144	0.304931	46.065	-8.89161	29.721	-264.267	0.499418	0.990972	32.7418	32.4462	-0.999449	0.449465	0.204894	54.4137	32.8	5	1	12.5
ICGV 02501	Spanish	2	5	NaSARRI	2020B	R7	10	35.35	0.57	0.383758	59.6427	0.281377	46.1885	-8.15613	28.1757	-229.805	0.490527	1.50979	31.3535	47.3374	-1.03306	0.456427	0.240002	47.4172	30.2	7	1	10
SGV 07010	Virginia	2	5	NaSARRI	2020B	R7	8	20.7	0.58	0.394659	62.1897	0.266517	47.3531	-8.95282	27.8809	-249.613	0.526135	0.361114	31.5668	11.3992	-0.960325	0.50984	0.257032	49.5858	32.5	5	0	0
Acholi White	Valencia	3	1	NaSARRI	2020B	R7	11	28.65	0.49	0.430137	48.4937	0.234928	49.812	-4.316	26.0328	-112.358	0.339151	6.43713	29.6031	190.559	-1.44998	0.292334	0.120826	58.6686	34.2	6	1	9.09091
ICGV-SM 95714	Valencia	3	1	NaSARRI	2020B	R7	12	33.95	0.65	0.376691	56.4663	0.240619	44.4921	-6.5405	24.4899	-160.176	0.470834	2.36232	27.4329	64.8053	-1.10451	0.410348	0.230094	43.927	30.5	5	2	16.6667
Serenut 5R	Virginia	3	1	NaSARRI	2020B	R7	12	26.05	0.55	0.430762	64.4222	0.0754272	47.7697	-5.51227	13.4197	-73.9729	0.65345	-0.66548	16.8405	-11.207	-0.820007	0.364552	0.277528	23.8716	31.7	5	0	0
SGV 07010	Virginia	3	1	NaSARRI	2020B	R7	7	23.65	0.66	0.393911	80.5733	0.11309	45.1489	-8.89985	16.4553	-146.45	0.751264	-3.94752	20.3319	-80.2606	-0.608573	0.519607	0.390022	24.9391	31.2	5	1	14.2857
ICGV 01510	Spanish	3	1	NaSARRI	2020B	R7	9	35.7	0.57	0.392189	83.8481	0.118539	45.2464	-9.83093	17.0781	-167.893	0.77616	-4.93747	21.1489	-104.422	-0.56159	0.507988	0.38693	23.831	29.5	6	1	11.1111
SGV 0047	Virginia	3	1	NaSARRI	2020B	R7	7	29.6	0.62	0.41239	87.0181	0.0673798	46.2254	-7.6581	13.047	-99.9149	0.797795	-3.74557	16.6512	-62.3683	-0.556423	0.469096	0.404129	13.8494	30.2	5	0	0
RedBeauty	Valencia	3	1	NaSARRI	2020B	R7	12	27.55	0.43	0.403744	71.2585	0.0824768	45.2083	-6.22922	13.6037	-84.7404	0.694018	-1.57535	16.8801	-26.592	-0.735257	0.396971	0.318129	19.861	33.3	6	0	0
SGV 0075	Virginia	3	1	NaSARRI	2020B	R7	12	34.4	0.65	0.412845	82.4662	0.102552	47.039	-9.04691	16.1954	-146.518	0.765703	-4.26098	20.3596	-86.7521	-0.589317	0.446355	0.364361	18.3697	32.1	5	0	0
ICGV SM 03590	Spanish	3	1	NaSARRI	2020B	R7	10	29.95	0.8	0.383998	64.2195	0.122203	43.6294	-6.21217	16.0706	-99.8334	0.619528	-0.508368	19.2307	-9.77629	-0.854539	0.341221	0.233793	31.4835	26.8	4	0	0
SGV 0071	Virginia	3	1	NaSARRI	2020B	R7	10	23.95	0.68	0.389394	94.9896	0.114987	45.4657	-12.2015	17.477	-213.246	0.860636	-7.9203	22.0101	-174.327	-0.423202	0.663978	0.54558	17.8316	29.8	4	1	10
ICGV-SM 08556	Spanish	3	2	NaSARRI	2020B	R7	14	32.8	0.52	0.393347	111.115	0.10559	46.8184	-16.4103	18.3075	-300.432	0.974882	-13.1401	23.8137	-312.914	-0.25488	0.763157	0.695841	8.8207	26.9	6	1	7.14286
ICGV 01514	Spanish	3	2	NaSARRI	2020B	R7	10	26.8	0.51	0.389403	96.1505	0.102787	45.1531	-11.5328	16.3907	-189.031	0.866616	-7.46362	20.7335	-154.747	-0.420243	0.553799	0.467301	15.619	30.2	6	0	0
SGV 0023	Virginia	3	2	NaSARRI	2020B	R7	9	29.45	0.6	0.398453	69.4082	0.105636	45.0553	-6.70549	15.3783	-103.119	0.667612	-1.44896	18.8136	-27.2601	-0.769646	0.419409	0.295915	29.4448	32.6	4	0	0
ICGV-SM 96714	Valencia	3	2	NaSARRI	2020B	R7	14	27.8	0.49	0.404983	67.8038	0.0882921	45.3689	-6.04312	14.0253	-84.7568	0.668594	-1.13714	17.3146	-19.6892	-0.780262	0.376679	0.280149	25.6266	30.4	6	0	0
ICGV 9555	Spanish	3	2	NaSARRI	2020B	R7	11	35.95	0.46	0.395301	96.2174	0.0952648	45.5748	-11.0891	15.8329	-175.573	0.865918	-7.11486	20.1397	-143.291	-0.42559	0.600732	0.507121	15.5828	30.3	7	0	0
ICGV-SM 99568	Spanish	3	2	NaSARRI	2020B	R7	10	36.2	0.36	0.401261	70.8876	0.130727	45.9329	-7.86641	17.6941	-139.189	0.667639	-2.04303	21.5256	-43.9775	-0.752284	0.411227	0.286497	30.3313	31.6	6	0	0
ICGV-SM 16502	Spanish	3	2	NaSARRI	2020B	R7	11	30.35	0.39	0.412814	51.3985	0.0831133	45.7168	-4.10592	13.2547	-54.4229	0.55618	1.15993	16.1829	18.771	-1.01996	0.301911	0.207647	31.2227	30.6	7	0	0
DOK 1T	Spanish	3	2	NaSARRI	2020B	R7	6	31.45	0.46	0.4091	53.5317	0.0891932	45.4699	-4.40172	13.7286	-60.4293	0.56473	0.965089	16.7151	16.1315	-0.995832	0.302518	0.21515	28.8801	31.3	5	0	0
ICGV-SM 16501	Spanish	3	2	NaSARRI	2020B	R7	9	14.15	0.51	0.421793	43.1896	0.0873315	46.4949	-3.04845	13.5116	-41.1893	0.461098	2.75235	16.3524	45.0076	-1.24005	0.231981	0.1255	45.9007	28.1	6	0	0
ICGV-SM 16520	Spanish	3	2	NaSARRI	2020B	R7	11	33.45	0.45	0.396368	72.1338	0.0934505	44.6695	-6.67694	14.392	-96.0943	0.695725	-1.83645	17.7279	-32.5564	-0.724139	0.42776	0.330876	22.649	27.8	6	0	0
B7-30-9-3	Spanish	3	3	NaSARRI	2020B	R7	14	26.5	0.43	0.405516	61.287	0.121437	45.8624	-6.01862	16.5789	-99.7818	0.594862	0.00853775	20.041	0.171105	-0.905721	0.330088	0.24739	25.0532	32.8	6	3	21.4286
SGV 0060	Virginia	3	3	NaSARRI	2020B	R7	10	27.8	0.63	0.391563	69.935	0.140795	45.0297	-7.8581	18.1402	-142.548	0.656197	-1.86065	21.8262	-40.6109	-0.768246	0.401784	0.301336	25.0003	30.2	5	1	10
JL 24	Spanish	3	3	NaSARRI	2020B	R7	13	24.4	0.45	0.405336	66.9655	0.0996063	45.6041	-6.26	14.9555	-93.6214	0.653598	-1.02241	18.3649	-18.7764	-0.801601	0.378969	0.297929	21.3844	32.5	7	0	0
Serenut 9T	Virginia	3	3	NaSARRI	2020B	R7	3	21.4	0.66	0.411718	85.7458	0.123483	47.6327	-10.9627	18.3457	-201.118	0.789396	-5.96322	23.0177	-137.259	-0.53549	0.491103	0.405294	17.4728	30.8	4	0	0
12CS-015	Spanish	3	3	NaSARRI	2020B	R7	5	29.6	0.47	0.404908	70.0506	0.097138	45.6041	-6.63886	14.8676	-98.7042	0.678814	-1.57413	18.341	-28.8711	-0.75385	0.400848	0.294325	26.5744	33.6	6	2	40
ICGV-SM 88710	Virginia	3	3	NaSARRI	2020B	R7	8	34.05	0.57	0.401781	86.9906	0.102615	46.0403	-9.73898	16.1297	-157.087	0.799367	-5.20946	20.2754	-105.624	-0.531094	0.47709	0.404049	15.3098	32.1	5	0	0
Serenut 14R	Virginia	3	3	NaSARRI	2020B	R7	3	16.9	0.76	0.391336	65.8079	0.108652	44.2307	-6.20301	15.2646	-94.6863	0.641192	-0.827666	18.4922	-15.3054	-0.820111	0.371981	0.285507	23.2468	32.3	4	0	0
Serenut 4T	Spanish	3	3	NaSARRI	2020B	R7	15	30.6	0.43	0.39258	79.5708	0.10963	44.8802	-8.52828	16.0538	-136.911	0.744919	-3.61548	19.8138	-71.6366	-0.622136	0.427671	0.358085	16.2709	40.8	7	0	0
SGV 990400	Virginia	3	3	NaSARRI	2020B	R7	9	36.35	0.64	0.390105	77.7798	0.105622	44.4444	-7.95855	15.5087	-123.427	0.732288	-3.08004	19.0885	-58.7932	-0.647795	0.414908	0.349398	15.789	30.6	4	0	0
SGV 0080	Virginia	3	3	NaSARRI	2020B	R7	10	25.15	0.55	0.428979	37.9553	0.0809475	47.007	-2.31256	12.9595	-29.9696	0.407147	3.53149	15.6745	55.3546	-1.38522	0.202873	0.10673	47.3908	35.7	4	0	0
SGV 0084	Virginia	3	4	NaSARRI	2020B	R7	9	24.6	0.63	0.401925	94.8821	0.119622	47.003	-12.8774	18.3752	-236.625	0.860546	-8.49833	23.291	-197.934	-0.420645	0.581122	0.475214	18.2246	28.5	4	2	22.2222
SGV 10005	Spanish	3	4	NaSARRI	2020B	R7	11	27.45	0.41	0.421171	80.7188	0.0833684	47.3768	-7.80332	14.5217	-113.318	0.754838	-3.2989	18.4035	-60.7113	-0.621283	0.468578	0.382157	18.4433	30.8	6	0	0
ICGV 02501	Spanish	3	4	NaSARRI	2020B	R7	7	38.45	0.39	0.383218	91.0557	0.130121	44.9743	-12.1101	18.3785	-222.565	0.832687	-7.43935	22.8187	-169.756	-0.46002	0.562895	0.467338	16.976	37.2	6	0	0
SGV 0065	Virginia	3	4	NaSARRI	2020B	R7	10	21.8	0.55	0.414139	57.3513	0.0861949	46.0527	-4.85097	13.7401	-66.6527	0.597311	0.365712	16.8763	6.17187	-0.927554	0.327188	0.262011	19.9202	29.7	5	0	0
Serenut 6T	Spanish	3	4	NaSARRI	2020B	R7	12	31.6	0.34	0.414998	50.0655	0.0857415	45.9536	-3.98196	13.4757	-53.6596	0.539827	1.43522	16.424	23.572	-1.05444	0.294563	0.214046	27.3342	34.1	7	2	16.6667
SGV 10010 ER	Spanish	3	4	NaSARRI	2020B	R7	10	17.5	0.53	0.4063	80.4006	0.0978705	46.1268	-8.30522	15.4482	-128.301	0.751834	-3.57348	19.319	-69.036	-0.617161	0.48495	0.392584	19.0465	28.1	5	1	10
ICGV 01515	Spanish	3	4	NaSARRI	2020B	R7	13	35.7	0.4	0.394599	52.2155	0.0907754	43.9094	-4.12728	13.4228	-55.3995	0.552805	1.17159	16.1572	18.9296	-1.02147	0.295626	0.20807	29.6171	29.4	6	0	0
DOK 1R	Spanish	3	4	NaSARRI	2020B	R7	11	36.15	0.39	0.40667	65.6406	0.0890545	45.5035	-5.78865	14.0454	-81.3038	0.651688	-0.782289	17.3065	-13.5387	-0.813263	0.391109	0.313746	19.7805	30.8	6	0	0
ICGV-SM 03702	Virginia	3	4	NaSARRI	2020B	R7	7	27.25	0.53	0.406781	58.6972	0.132631	46.1104	-5.83915	17.4296	-101.774	0.563619	0.620963	20.9128	12.986	-0.964396	0.328569	0.221835	32.4845	32.9	4	0	0
SGV 0805	Valencia	3	4	NaSARRI	2020B	R7	11	35.1	0.46	0.409882	48.2504	0.0960098	45.5077	-3.7431	14.1007	-52.7805	0.503412	2.0367	16.9949	34.6134	-1.12993	0.288892	0.192621	33.3241	37.4	4	0	0
Serenut 8R	Virginia	3	5	NaSARRI	2020B	R7	9	25.15	0.71	0.41813	60.4913	0.110106	46.987	-5.78052	15.9728	-92.3309	0.596003	0.0950258	19.5253	1.85541	-0.911409	0.333213	0.264964	20.4818	32.5	4	0	0
ICGV 01502	Spanish	3	5	NaSARRI	2020B	R7	10	37.05	0.45	0.424357	44.5434	0.1261	47.3372	-3.19344	16.7382	-53.4524	0.40068	4.03932	19.8883	80.3353	-1.36077	0.265301	0.167875	36.723	35.1	6	0	0
Serenut 7T	Virginia	3	5	NaSARRI	2020B	R7	9	36.8	0.53	0.356868	57.6891	0.297454	43.2067	-7.27308	27.5756	-200.559	0.461555	2.34015	29.8512	69.8562	-1.09401	0.441054	0.255136	42.1532	33.7	4	0	0
Serenut 11T	Virginia	3	5	NaSARRI	2020B	R7	8	23.5	0.63	0.439449	39.2031	0.194687	49.5618	-1.07087	22.3692	-23.9544	0.169465	9.65272	25.4634	245.791	-2.02943	0.19626	0.0761703	61.189	31.6	4	0	0
ICGV-SM 01709	Virginia	3	5	NaSARRI	2020B	R7	10	28.7	0.49	0.408602	49.7277	0.271047	48.096	-4.67665	27.9024	-130.49	0.338106	6.49027	30.9347	200.774	-1.43155	0.333171	0.154443	53.6444	30.5	4	0	0
ICGVS-SM 0205	Spanish	3	5	NaSARRI	2020B	R7	3	33.7	0.4	0.439147	46.5827	0.242625	50.7695	-3.59088	26.9134	-96.6427	0.291445	7.90643	30.4727	240.93	-1.58613	0.289839	0.134895	53.4587	31.2	6	1	33.3333
ICGV-SM 95526	Valencia	3	5	NaSARRI	2020B	R7	10	33.85	0.48	0.411944	49.533	0.25541	48.2079	-4.60843	26.8617	-123.79	0.345452	6.21288	30.0385	186.626	-1.41996	0.317289	0.1625	48.7848	29.5	6	1	10
ICGV-SM 01731	Virginia	3	5	NaSARRI	2020B	R7	6	17.45	0.67	0.421656	41.766	0.273473	48.8975	-1.10941	27.9814	-31.0427	0.140203	11.8009	30.4816	359.711	-2.09761	0.199899	0.0734868	63.238	29	4	0	0
ICGV-SM 95355	Virginia	3	5	NaSARRI	2020B	R7	7	15.8	0.58	0.395247	46.9796	0.301802	46.8265	-3.33536	29.1847	-97.3415	0.258673	8.77596	31.4163	275.708	-1.65785	0.264973	0.0997337	62.3609	29.3	5	0	0
ICGV 01504	Spanish	3	5	NaSARRI	2020B	R7	11	35.65	0.33	0.431077	46.0955	0.245805	49.9035	-3.34847	26.7369	-89.5276	0.279776	8.12416	30.0696	244.29	-1.62096	0.296703	0.164657	44.5044	37.8	7	0	0
SGV 10010 ER	Spanish	1	1	Nakabango	2020B	R7	10	14.05	0.78	0.338313	50.7727	0.307256	40.6718	-4.53753	26.5008	-120.248	0.345681	5.55846	27.7221	154.092	-1.39359	0.397232	0.285511	28.1248	32.6	4	2	20
Serenut 14R	Virginia	1	1	Nakabango	2020B	R7	7	20.2	0.87	0.342398	61.9433	0.26442	41.2638	-7.93296	24.7574	-196.4	0.530297	0.380455	27.1076	10.3132	-0.955311	0.53684	0.428421	20.1958	29.9	3	0	0
DOK 1T	Spanish	1	1	Nakabango	2020B	R7	3	21.6	0.69	0.344215	24.1326	0.302351	38.9752	9.34178	23.8657	222.948	-1.0747	24.2882	22.3773	543.504	50.1291	0.132214	0.0834135	36.9102	32.9	5	1	33.3333
ICGV SM 03590	Spanish	1	1	Nakabango	2020B	R7	8	27.1	0.87	0.294642	65.0259	0.387632	37.6511	-9.87927	29.6498	-292.919	0.536863	-0.92415	30.0759	-27.7946	-0.879741	0.479957	0.380549	20.7119	30.6	3	1	12.5
ICGV 02501	Spanish	1	1	Nakabango	2020B	R7	15	30.75	0.77	0.32352	69.4358	0.38396	41.6295	-12.51	32.179	-402.559	0.591389	-3.47695	33.8508	-117.697	-0.766386	0.589693	0.382276	35.1736	32.5	5	2	13.3333
SGV 0080	Virginia	1	1	Nakabango	2020B	R7	7	23.2	0.81	0.38224	53.1514	0.222481	44.6264	-5.41842	23.1551	-125.464	0.434065	3.4346	26.0574	89.4969	-1.20612	0.478198	0.349899	26.8297	30	4	0	0
JL 24	Spanish	1	1	Nakabango	2020B	R7	5	25.3	0.75	0.34508	30.3129	0.307417	39.7011	5.54035	24.8914	137.907	-0.446202	19.2005	24.1708	464.092	-7.09701	0.207162	0.107529	48.0943	31.1	6	4	80
Acholi White	Valencia	1	1	Nakabango	2020B	R7	8	29.65	0.66	0.339745	44.3465	0.324806	40.543	-1.74646	27.1068	-47.3409	0.183997	9.64443	27.6181	266.361	-1.9112	0.323782	0.14968	53.7713	30.5	6	7	87.5
ICGV-SM 16502	Spanish	1	1	Nakabango	2020B	R7	8	31.45	0.74	0.338098	52.1875	0.356353	41.4472	-5.25383	29.8012	-156.57	0.346904	5.706	30.6521	174.901	-1.36275	0.386915	0.21899	43.4009	28.7	6	3	37.5
SGV 0060	Virginia	1	1	Nakabango	2020B	R7	12	22.75	0.85	0.343266	58.9251	0.281276	41.4424	-7.26325	25.7256	-186.851	0.486233	1.6223	27.8349	45.1567	-1.04574	0.526191	0.373611	28.997	28.5	4	5	41.6667
SGV 0075	Virginia	1	2	Nakabango	2020B	R7	12	29.5	0.86	0.366554	85.0719	0.256132	45.8873	-16.6945	27.8916	-465.637	0.776312	-10.1842	32.6398	-332.411	-0.489584	0.804716	0.64147	20.2861	29.5	3	2	16.6667
ICGV 01502	Spanish	1	2	Nakabango	2020B	R7	6	40.5	0.71	0.311291	34.4289	0.327772	36.409	3.24234	24.5212	79.5058	-0.201297	15.2082	23.4031	355.918	-4.09046	0.231392	0.142227	38.5341	31.5	5	3	50
SGV 07010	Virginia	1	2	Nakabango	2020B	R7	11	19.15	0.84	0.350272	72.23	0.319135	43.989	-12.9629	30.0708	-389.804	0.634191	-4.58086	33.1665	-151.931	-0.711936	0.616597	0.48318	21.6376	29.9	4	1	9.09091
Serenut 5R	Virginia	1	2	Nakabango	2020B	R7	18	21.55	0.81	0.372622	65.4335	0.248134	44.7169	-9.23312	25.5215	-235.643	0.572407	-0.967861	28.9028	-27.9739	-0.872509	0.585773	0.405539	30.7685	31.1	5	1	5.55556
12CS-015	Spanish	1	2	Nakabango	2020B	R7	7	12.65	0.61	0.361346	28.37	0.318993	41.4376	7.46896	26.3742	196.988	-0.649974	22.9334	25.4307	583.213	-13.5432	0.161545	0.0476672	70.4929	29.8	6	6	85.7143
DOK 1R	Spanish	1	2	Nakabango	2020B	R7	12	30.6	0.73	0.334164	60.8391	0.397985	42.3565	-9.23821	33.0026	-304.885	0.473544	1.23022	34.0827	41.9291	-1.0136	0.496887	0.281044	43.4389	28.8	5	0	0
B7-30-9-3	Spanish	1	2	Nakabango	2020B	R7	9	22.55	0.66	0.329995	44.2814	0.358372	39.8084	-1.4369	28.5914	-41.083	0.157076	10.481	28.4558	298.245	-1.99933	0.328708	0.135046	58.916	30.9	5	8	88.8889
ICGV-SM 08556	Spanish	1	2	Nakabango	2020B	R7	13	34.1	0.59	0.329098	42.6983	0.348418	39.4389	-0.71472	27.7415	-19.8274	0.116425	11.1728	27.5579	307.898	-2.17028	0.320804	0.151382	52.8118	29.8	6	10	76.9231
Serenut 7T	Virginia	1	2	Nakabango	2020B	R7	12	23.65	0.83	0.379773	73.4233	0.320303	47.6797	-14.3959	32.3011	-465.002	0.64557	-5.71974	36.3753	-208.057	-0.688143	0.636876	0.4741	25.5585	29.1	3	0	0
ICGV-SM 01709	Virginia	1	2	Nakabango	2020B	R7	9	20.55	0.85	0.386996	64.5439	0.302656	47.3253	-10.3366	30.4234	-314.476	0.542941	-0.719595	33.9657	-24.4415	-0.903624	0.534533	0.409191	23.4489	28.1	4	0	0
ICGV-SM 95526	Valencia	1	3	Nakabango	2020B	R7	11	32.5	0.66	0.331735	45.9239	0.341744	39.9558	-2.36194	27.829	-65.7303	0.215571	8.94999	28.1132	251.613	-1.78856	0.345767	0.163744	52.6432	26.9	6	8	72.7273
ICGV-SM 95355	Virginia	1	3	Nakabango	2020B	R7	10	19.75	0.83	0.34676	43.6361	0.312769	41.1474	-1.51822	26.716	-40.5608	0.172279	9.90381	27.4442	271.803	-1.96048	0.335041	0.22646	32.4085	26.6	4	5	50
Serenut 6T	Spanish	1	3	Nakabango	2020B	R7	14	30.55	0.71	0.328329	31.3519	0.344121	38.2404	5.69901	26.2638	149.677	-0.435805	19.6816	24.7833	487.776	-7.12345	0.185322	0.0778225	58.0069	26.6	5	9	64.2857
ICGV-SM 16520	Spanish	1	3	Nakabango	2020B	R7	11	32	0.68	0.321301	51.3923	0.391648	39.8491	-4.79034	30.6973	-147.051	0.317387	6.4466	30.6584	197.643	-1.43207	0.400208	0.160175	59.977	31.2	6	0	0
ICGV 01504	Spanish	1	3	Nakabango	2020B	R7	10	31.3	0.73	0.331605	45.7334	0.390177	40.5281	-1.96487	30.7887	-60.496	0.175677	10.5283	30.4076	320.142	-1.91271	0.337616	0.168366	50.1309	27.3	6	2	20
SGV 0805	Valencia	1	3	Nakabango	2020B	R7	10	19.9	0.6	0.336893	33.0765	0.337779	39.325	4.56302	26.6035	121.392	-0.309284	18.3409	25.6006	469.537	-5.1989	0.233448	0.105224	54.9261	31.2	5	11	110
ICGV-SM 01731	Virginia	1	3	Nakabango	2020B	R7	10	20.3	0.83	0.344091	50.8496	0.258486	40.6767	-4.49248	23.5968	-106.008	0.377629	4.61853	25.3298	116.986	-1.33333	0.44862	0.33974	24.2701	30.4	3	2	20
ICGV-SM 95714	Valencia	1	3	Nakabango	2020B	R7	13	38.6	0.68	0.337738	50.8298	0.386726	41.7059	-4.64912	31.5795	-146.817	0.303483	7.12772	31.9278	227.573	-1.47502	0.406249	0.20587	49.3242	25.9	4	7	53.8462
Serenut 11T	Virginia	1	3	Nakabango	2020B	R7	8	20.35	0.83	0.364644	71.6493	0.271248	44.6997	-11.7791	27.3942	-322.68	0.6362	-3.79911	30.9788	-117.692	-0.731728	0.646198	0.46231	28.4568	26.9	5	2	25
Serenut 8R	Virginia	1	3	Nakabango	2020B	R7	11	25.8	0.89	0.357055	80.9293	0.360334	46.7298	-18.79	34.7359	-652.687	0.725893	-10.9706	38.7687	-425.317	-0.528151	0.715632	0.578563	19.1537	27.4	4	0	0
ICGV-SM 99568	Spanish	1	4	Nakabango	2020B	R7	13	21.25	0.73	0.335929	37.5823	0.331152	39.5729	1.80359	26.5865	47.9511	-0.0623348	14.3829	26.2189	377.103	-3.08522	0.251512	0.116666	53.6143	29.4	5	7	53.8462
ICGV-SM 88710	Virginia	1	4	Nakabango	2020B	R7	9	23.3	0.82	0.342054	54.7936	0.340062	41.896	-6.32528	29.2593	-185.073	0.400457	4.09113	30.5977	125.179	-1.22476	0.447196	0.318304	28.8222	29.8	4	5	55.5556
SGV 0071	Virginia	1	4	Nakabango	2020B	R7	10	20.85	0.84	0.359272	68.2581	0.353879	45.352	-12.3301	32.7246	-403.499	0.578882	-2.87549	35.5448	-102.209	-0.803376	0.567442	0.417493	26.4253	29.1	3	2	20
SGV 0084	Virginia	1	4	Nakabango	2020B	R7	12	20	0.82	0.334035	53.8433	0.333847	40.7804	-5.80458	28.2297	-163.862	0.388452	4.38407	29.3505	128.675	-1.26065	0.426506	0.322645	24.3516	28.6	4	3	25
ICGV 01514	Spanish	1	4	Nakabango	2020B	R7	12	31	0.7	0.326816	60.6056	0.352953	40.7261	-8.4336	29.5567	-249.269	0.483895	1.19653	30.8402	36.9011	-1.01283	0.47694	0.301687	36.7452	29.9	5	1	8.33333
RedBeauty	Valencia	1	4	Nakabango	2020B	R7	11	31.35	0.57	0.337309	30.9068	0.335511	39.1376	5.90773	26.246	155.054	-0.459993	20.1468	24.9964	503.597	-7.54623	0.190516	0.0652364	65.7581	28.5	6	10	90.9091
ICGV-SM 03702	Virginia	1	4	Nakabango	2020B	R7	11	19.05	0.84	0.36738	69.017	0.311265	45.579	-11.8762	30.2842	-359.661	0.596668	-2.97859	33.6273	-100.162	-0.788406	0.60612	0.453573	25.1678	27.3	4	1	9.09091
SGV 0023	Virginia	1	4	Nakabango	2020B	R7	11	21.1	0.84	0.34819	77.5828	0.323763	44.3922	-15.4196	30.9175	-476.737	0.693731	-7.59972	34.4195	-261.578	-0.600191	0.694054	0.534431	22.9987	26	4	0	0
SGV 990400	Virginia	1	4	Nakabango	2020B	R7	11	29.6	0.81	0.317106	68.9797	0.366802	40.4833	-11.7567	30.529	-358.92	0.589419	-2.99097	32.0981	-96.0045	-0.778827	0.574124	0.413829	27.9199	27.1	3	4	36.3636
ICGV-SM 16501	Spanish	1	4	Nakabango	2020B	R7	10	27.8	0.69	0.324572	36.7646	0.365358	38.541	2.79652	27.8607	77.9131	-0.137854	16.0832	26.6539	428.679	-3.60712	0.248411	0.0966037	61.1114	31.7	6	7	70
ICGVS-SM 0205	Spanish	1	5	Nakabango	2020B	R7	6	15.05	0.51	0.342232	27.8554	0.322126	39.2782	7.55253	25.3893	191.753	-0.695718	22.2806	24.0356	535.527	-16.4489	0.140402	0.0468825	66.6084	31.6	6	2	33.3333
ICGV 9555	Spanish	1	5	Nakabango	2020B	R7	13	33.75	0.65	0.332631	38.838	0.340238	39.4027	1.24218	27.0832	33.6422	-0.0180455	13.7262	26.6598	365.938	-2.82671	0.249401	0.109423	56.1259	26.3	6	9	69.2308
SGV 10005	Spanish	1	5	Nakabango	2020B	R7	7	27.95	0.64	0.344638	29.8583	0.305743	39.5934	5.75132	24.7219	142.183	-0.475833	19.4268	23.9631	465.527	-7.65673	0.16844	0.0812017	51.7918	30.1	6	7	100
ICGV 01515	Spanish	1	5	Nakabango	2020B	R7	9	30.05	0.77	0.351081	42.9796	0.324802	41.7345	-1.09302	27.6967	-30.2732	0.14052	10.9176	28.3074	309.047	-2.07859	0.321578	0.189572	41.0493	32.9	5	2	22.2222
Serenut 4T	Spanish	1	5	Nakabango	2020B	R7	18	42	0.67	0.325945	56.4529	0.405051	41.0646	-7.23031	32.3608	-233.978	0.405523	3.68921	32.7558	120.843	-1.17888	0.466621	0.177018	62.0638	29.1	7	3	16.6667
ICGV 01510	Spanish	1	5	Nakabango	2020B	R7	12	30.55	0.73	0.360367	46.0195	0.330198	43.1523	-2.56861	28.9624	-74.3932	0.219397	9.40986	30.0208	282.491	-1.7783	0.365859	0.214797	41.2898	26.1	5	5	41.6667
Serenut 9T	Virginia	1	5	Nakabango	2020B	R7	7	21.55	0.85	0.351724	47.5797	0.331304	42.3052	-3.28408	28.6335	-94.0346	0.260291	8.18688	29.6475	242.72	-1.63995	0.42211	0.322379	23.6268	30.3	3	0	0
ICGV-SM 96714	Valencia	1	5	Nakabango	2020B	R7	12	16.2	0.46	0.359699	25.9926	0.330323	41.1182	9.56704	26.7605	256.019	-0.941771	26.1945	25.2044	660.216	-5086.69	0.135512	0.0479495	64.6159	29.6	6	12	100
SGV 0065	Virginia	1	5	Nakabango	2020B	R7	10	18.85	0.83	0.379904	45.9636	0.325897	45.3309	-2.64651	29.8848	-79.0903	0.217499	9.85963	31.4183	309.772	-1.78548	0.383024	0.260222	32.0612	28.9	5	2	20
[truncated: 401 more rows]
