# Supplementary material for: Exploration of Alternative Approaches to Phenotyping of Late Leaf Spot and Groundnut Rosette Virus Disease for Groundnut Breeding
Source: Front Plant Sci. 2022 Jun 14;13:912332. doi: 10.3389/fpls.2022.912332 (PMC9238324; doi:10.3389/fpls.2022.912332)
Supplement: Supplementary file 4 [file Table_4.xlsx]

## Sheet: Sheet1
Traits	Phenological stage	MT	PearsonCorrelation
NDVI	R2	Spanish	-0.07
Intensity	R2	Spanish	-0.86
Hue	R2	Spanish	-0.19
Saturation	R2	Spanish	-0.7
Lightness	R2	Spanish	-0.76
a*	R2	Spanish	-0.58
b*	R2	Spanish	-0.7
ab	R2	Spanish	-0.8
NDLab	R2	Spanish	0.12
u*	R2	Spanish	-0.82
v*	R2	Spanish	-0.66
uv	R2	Spanish	-0.82
NDLuv	R2	Spanish	-0.1
GA	R2	Spanish	-0.3
GGA	R2	Spanish	0.1
CSI	R2	Spanish	-0.8
Canopy Temp	R2	Spanish
NDVI	R2	Valencia	-0.23
Intensity	R2	Valencia	-0.73
Hue	R2	Valencia	-0.36
Saturation	R2	Valencia	-0.8
Lightness	R2	Valencia	-0.81
a*	R2	Valencia	-0.55
b*	R2	Valencia	-0.78
ab	R2	Valencia	-0.77
NDLab	R2	Valencia	0.22
u*	R2	Valencia	-0.79
v*	R2	Valencia	-0.75
uv	R2	Valencia	-0.82
NDLuv	R2	Valencia	0.69
GA	R2	Valencia	-0.57
GGA	R2	Valencia	-0.18
CSI	R2	Valencia	-0.79
Canopy Temp	R2	Valencia
NDVI	R2	Virginia	0.08
Intensity	R2	Virginia	-0.6
Hue	R2	Virginia	-0.06
Saturation	R2	Virginia	-0.64
Lightness	R2	Virginia	-0.55
a*	R2	Virginia	-0.71
b*	R2	Virginia	-0.61
ab	R2	Virginia	-0.78
NDLab	R2	Virginia	0.29
u*	R2	Virginia	-0.8
v*	R2	Virginia	-0.57
uv	R2	Virginia	-0.73
NDLuv	R2	Virginia	0
GA	R2	Virginia	-0.23
GGA	R2	Virginia	0.26
CSI	R2	Virginia	-0.73
Canopy Temp	R2	Virginia
NDVI	R2	All	-0.02
Intensity	R2	All	-0.69
Hue	R2	All	-0.14
Saturation	R2	All	-0.66
Lightness	R2	All	-0.69
a*	R2	All	-0.6
b*	R2	All	-0.65
ab	R2	All	-0.76
NDLab	R2	All	0.15
u*	R2	All	-0.78
v*	R2	All	-0.61
uv	R2	All	-0.76
NDLuv	R2	All	0.04
GA	R2	All	-0.27
GGA	R2	All	0.14
CSI	R2	All	-0.74
Canopy Temp	R2	All
NDVI	R4	Spanish	-0.44
Intensity	R4	Spanish	-0.4
Hue	R4	Spanish	0.3
Saturation	R4	Spanish	0.59
Lightness	R4	Spanish	0.04
a*	R4	Spanish	-0.24
b*	R4	Spanish	0.55
ab	R4	Spanish	-0.23
NDLab	R4	Spanish	0.14
u*	R4	Spanish	-0.17
v*	R4	Spanish	0.48
uv	R4	Spanish	-0.1
NDLuv	R4	Spanish	0
GA	R4	Spanish	0.26
GGA	R4	Spanish	0.19
CSI	R4	Spanish	0.72
Canopy Temp	R4	Spanish
NDVI	R4	Valencia	0.41
Intensity	R4	Valencia	-0.05
Hue	R4	Valencia	0.02
Saturation	R4	Valencia	-0.08
Lightness	R4	Valencia	-0.05
a*	R4	Valencia	-0.04
b*	R4	Valencia	-0.08
ab	R4	Valencia	-0.04
NDLab	R4	Valencia	0.06
u*	R4	Valencia	-0.04
v*	R4	Valencia	0
uv	R4	Valencia	-0.04
NDLuv	R4	Valencia	0
GA	R4	Valencia	0.05
GGA	R4	Valencia	-0.02
CSI	R4	Valencia	0.8
Canopy Temp	R4	Valencia
NDVI	R4	Virginia	-0.01
Intensity	R4	Virginia	0.17
Hue	R4	Virginia	0.45
Saturation	R4	Virginia	0.43
Lightness	R4	Virginia	0.51
a*	R4	Virginia	-0.46
b*	R4	Virginia	0.53
ab	R4	Virginia	-0.5
NDLab	R4	Virginia	0.35
u*	R4	Virginia	-0.44
v*	R4	Virginia	0.53
uv	R4	Virginia	-0.43
NDLuv	R4	Virginia	0
GA	R4	Virginia	0.48
GGA	R4	Virginia	0.44
CSI	R4	Virginia	0.78
Canopy Temp	R4	Virginia
NDVI	R4	All	-0.42
Intensity	R4	All	-0.22
Hue	R4	All	0.16
Saturation	R4	All	0.54
Lightness	R4	All	0.07
a*	R4	All	-0.12
b*	R4	All	0.46
ab	R4	All	-0.13
NDLab	R4	All	0.04
u*	R4	All	-0.06
v*	R4	All	0.35
uv	R4	All	-0.01
NDLuv	R4	All	0
GA	R4	All	0.13
GGA	R4	All	0.05
CSI	R4	All	0.76
Canopy Temp	R4	All
NDVI	R7	Spanish	-0.54
Intensity	R7	Spanish	-0.12
Hue	R7	Spanish	-0.67
Saturation	R7	Spanish	0.06
Lightness	R7	Spanish	-0.53
a*	R7	Spanish	0.68
b*	R7	Spanish	-0.56
ab	R7	Spanish	0.67
NDLab	R7	Spanish	-0.71
u*	R7	Spanish	0.68
v*	R7	Spanish	-0.66
uv	R7	Spanish	0.65
NDLuv	R7	Spanish	0.71
GA	R7	Spanish	-0.64
GGA	R7	Spanish	-0.52
CSI	R7	Spanish	-0.24
Canopy Temp	R7	Spanish	0.01
NDVI	R7	Valencia	-0.22
Intensity	R7	Valencia	-0.26
Hue	R7	Valencia	-0.87
Saturation	R7	Valencia	0.06
Lightness	R7	Valencia	-0.57
a*	R7	Valencia	0.84
b*	R7	Valencia	-0.82
ab	R7	Valencia	0.82
NDLab	R7	Valencia	-0.88
u*	R7	Valencia	0.84
v*	R7	Valencia	-0.82
uv	R7	Valencia	0.82
NDLuv	R7	Valencia	0.78
GA	R7	Valencia	-0.83
GGA	R7	Valencia	-0.65
CSI	R7	Valencia	-0.48
Canopy Temp	R7	Valencia	0.28
NDVI	R7	Virginia	-0.59
Intensity	R7	Virginia	-0.53
Hue	R7	Virginia	-0.62
Saturation	R7	Virginia	0.42
Lightness	R7	Virginia	-0.66
a*	R7	Virginia	0.61
b*	R7	Virginia	-0.42
ab	R7	Virginia	0.63
NDLab	R7	Virginia	-0.44
u*	R7	Virginia	0.61
v*	R7	Virginia	-0.58
uv	R7	Virginia	0.64
NDLuv	R7	Virginia	-0.22
GA	R7	Virginia	-0.61
GGA	R7	Virginia	-0.62
CSI	R7	Virginia	0.39
Canopy Temp	R7	Virginia	0.25
NDVI	R7	All	-0.59
Intensity	R7	All	-0.27
Hue	R7	All	-0.66
Saturation	R7	All	0.16
Lightness	R7	All	-0.6
a*	R7	All	0.65
b*	R7	All	-0.54
ab	R7	All	0.65
NDLab	R7	All	-0.58
u*	R7	All	0.65
v*	R7	All	-0.63
uv	R7	All	0.64
NDLuv	R7	All	0.2
GA	R7	All	-0.64
GGA	R7	All	-0.59
CSI	R7	All	0.02
Canopy Temp	R7	All	0.26
NDVI	R8	Spanish	-0.89
Intensity	R8	Spanish	-0.52
Hue	R8	Spanish	-0.62
Saturation	R8	Spanish	-0.66
Lightness	R8	Spanish	-0.74
a*	R8	Spanish	0.29
b*	R8	Spanish	-0.72
ab	R8	Spanish	0.12
NDLab	R8	Spanish	-0.57
u*	R8	Spanish	-0.05
v*	R8	Spanish	-0.77
uv	R8	Spanish	-0.3
NDLuv	R8	Spanish	-0.07
GA	R8	Spanish	-0.69
GGA	R8	Spanish	-0.59
CSI	R8	Spanish	0.02
Canopy Temp	R8	Spanish	0.4
NDVI	R8	Valencia	-0.83
Intensity	R8	Valencia	-0.65
Hue	R8	Valencia	-0.9
Saturation	R8	Valencia	-0.81
Lightness	R8	Valencia	-0.74
a*	R8	Valencia	-0.09
b*	R8	Valencia	-0.82
ab	R8	Valencia	-0.36
NDLab	R8	Valencia	-0.5
u*	R8	Valencia	-0.56
v*	R8	Valencia	-0.84
uv	R8	Valencia	-0.7
NDLuv	R8	Valencia	-0.08
GA	R8	Valencia	-0.79
GGA	R8	Valencia	-0.53
CSI	R8	Valencia	-0.71
Canopy Temp	R8	Valencia	0.64
NDVI	R8	Virginia	-0.64
Intensity	R8	Virginia	-0.6
Hue	R8	Virginia	-0.04
Saturation	R8	Virginia	-0.74
Lightness	R8	Virginia	-0.67
a*	R8	Virginia	-0.04
b*	R8	Virginia	-0.75
ab	R8	Virginia	-0.03
NDLab	R8	Virginia	-0.02
u*	R8	Virginia	-0.23
v*	R8	Virginia	-0.74
uv	R8	Virginia	-0.35
NDLuv	R8	Virginia	-0.68
GA	R8	Virginia	-0.31
GGA	R8	Virginia	-0.23
CSI	R8	Virginia	-0.03
Canopy Temp	R8	Virginia	0.16
NDVI	R8	All	-0.85
Intensity	R8	All	-0.47
Hue	R8	All	-0.55
Saturation	R8	All	-0.68
Lightness	R8	All	-0.74
a*	R8	All	0.37
b*	R8	All	-0.75
ab	R8	All	0.29
NDLab	R8	All	-0.55
u*	R8	All	0.11
v*	R8	All	-0.8
uv	R8	All	-0.12
NDLuv	R8	All	-0.15
GA	R8	All	-0.66
GGA	R8	All	-0.59
CSI	R8	All	0.14
Canopy Temp	R8	All	0.42
